# Supplementary material for: Meteorological and Agricultural Drought Risk Assessment via Kaplan-Meier Survivability Estimator
Source: Preprints.org preprint supplement (doi:10.20944/preprints202402.1389.v1), 2024-02-23
Supplement: Supplementary file 1 [file supplementary]

**METEOROLOGICAL AND AGRICULTURAL DROUGHT RISK ASSESSMENT VIA KAPLAN-MEIER SURVIVABILITY ESTIMATOR**

Cem P. Cetinkaya. Mert C. Gunacti

**SUPPLEMENTARY DATA**

**List of Abbreviations**

**c**

**LCL:** Lower Confidence Limit

**UCL:** Upper Confidence Limit

**Survival:** Kaplan-Meier survival estimate

**Std.err:** Standard error

**Table S1.** Data availability of the selected 27 meteorological stations.

| Year | Station Name | | | | | | | | | | | | | | | | | | | | | | | | | | | |
| --- | --- | --- | --- | --- | --- | --- | --- | --- | --- | --- | --- | --- | --- | --- | --- | --- | --- | --- | --- | --- | --- | --- | --- | --- | --- | --- | --- | --- |
| Ahmetli | Akhisar | Alaşehir | Aliağa | Bornova | Buldan | Demirci | Eşme | Foça | Gediz | Gölmarmara | Gördes | Güney | Kınık | Kiraz | Kırkağaç | | Kula | Manisa | Menemen | Ödemiş | Salihli | Sarıgöl | Saruhanlı | Selendi | Turgutlu | Ulubey | Uşak |
| 1929 |  |  |  |  |  |  |  |  |  |  |  |  |  |  |  | |  |  |  |  |  |  |  |  |  |  |  |  |
| 1930 |  |  |  |  |  |  |  |  |  |  |  |  |  |  |  | |  |  |  |  |  |  |  |  |  |  |  |  |
| 1931 |  |  |  |  |  |  |  |  |  |  |  |  |  |  |  | |  |  |  |  |  |  |  |  |  |  |  |  |
| 1932 |  |  |  |  |  |  |  |  |  |  |  |  |  |  |  | |  |  |  |  |  |  |  |  |  |  |  |  |
| 1933 |  |  |  |  |  |  |  |  |  |  |  |  |  |  |  | |  |  |  |  |  |  |  |  |  |  |  |  |
| 1934 |  |  |  |  |  |  |  |  |  |  |  |  |  |  |  | |  |  |  |  |  |  |  |  |  |  |  |  |
| 1935 |  |  |  |  |  |  |  |  |  |  |  |  |  |  |  | |  |  |  |  |  |  |  |  |  |  |  |  |
| 1936 |  |  |  |  |  |  |  |  |  |  |  |  |  |  |  | |  |  |  |  |  |  |  |  |  |  |  |  |
| 1937 |  |  |  |  |  |  |  |  |  |  |  |  |  |  |  | |  |  |  |  |  |  |  |  |  |  |  |  |
| 1938 |  |  |  |  |  |  |  |  |  |  |  |  |  |  |  | |  |  |  |  |  |  |  |  |  |  |  |  |
| 1939 |  |  |  |  |  |  |  |  |  |  |  |  |  |  |  | |  |  |  |  |  |  |  |  |  |  |  |  |
| 1940 |  |  |  |  |  |  |  |  |  |  |  |  |  |  |  | |  |  |  |  |  |  |  |  |  |  |  |  |
| 1941 |  |  |  |  |  |  |  |  |  |  |  |  |  |  |  | |  |  |  |  |  |  |  |  |  |  |  |  |
| 1942 |  |  |  |  |  |  |  |  |  |  |  |  |  |  |  | |  |  |  |  |  |  |  |  |  |  |  |  |
| 1943 |  |  |  |  |  |  |  |  |  |  |  |  |  |  |  | |  |  |  |  |  |  |  |  |  |  |  |  |
| 1944 |  |  |  |  |  |  |  |  |  |  |  |  |  |  |  | |  |  |  |  |  |  |  |  |  |  |  |  |
| 1945 |  |  |  |  |  |  |  |  |  |  |  |  |  |  |  | |  |  |  |  |  |  |  |  |  |  |  |  |
| 1946 |  |  |  |  |  |  |  |  |  |  |  |  |  |  |  | |  |  |  |  |  |  |  |  |  |  |  |  |
| 1947 |  |  |  |  |  |  |  |  |  |  |  |  |  |  |  | |  |  |  |  |  |  |  |  |  |  |  |  |
| 1948 |  |  |  |  |  |  |  |  |  |  |  |  |  |  |  | |  |  |  |  |  |  |  |  |  |  |  |  |
| 1949 |  |  |  |  |  |  |  |  |  |  |  |  |  |  |  | |  |  |  |  |  |  |  |  |  |  |  |  |
| 1950 |  |  |  |  |  |  |  |  |  |  |  |  |  |  |  | |  |  |  |  |  |  |  |  |  |  |  |  |
| 1951 |  |  |  |  |  |  |  |  |  |  |  |  |  |  |  | |  |  |  |  |  |  |  |  |  |  |  |  |
| 1952 |  |  |  |  |  |  |  |  |  |  |  |  |  |  |  | |  |  |  |  |  |  |  |  |  |  |  |  |
| 1953 |  |  |  |  |  |  |  |  |  |  |  |  |  |  |  | |  |  |  |  |  |  |  |  |  |  |  |  |
| 1954 |  |  |  |  |  |  |  |  |  |  |  |  |  |  |  | |  |  |  |  |  |  |  |  |  |  |  |  |
| 1955 |  |  |  |  |  |  |  |  |  |  |  |  |  |  |  | |  |  |  |  |  |  |  |  |  |  |  |  |
| 1956 |  |  |  |  |  |  |  |  |  |  |  |  |  |  |  | |  |  |  |  |  |  |  |  |  |  |  |  |
| 1957 |  |  |  |  |  |  |  |  |  |  |  |  |  |  |  | |  |  |  |  |  |  |  |  |  |  |  |  |
| 1958 |  |  |  |  |  |  |  |  |  |  |  |  |  |  |  | |  |  |  |  |  |  |  |  |  |  |  |  |
| 1959 |  |  |  |  |  |  |  |  |  |  |  |  |  |  |  | |  |  |  |  |  |  |  |  |  |  |  |  |
| 1960 |  |  |  |  |  |  |  |  |  |  |  |  |  |  |  | |  |  |  |  |  |  |  |  |  |  |  |  |
| 1961 |  |  |  |  |  |  |  |  |  |  |  |  |  |  |  | |  |  |  |  |  |  |  |  |  |  |  |  |
| 1962 |  |  |  |  |  |  |  |  |  |  |  |  |  |  |  | |  |  |  |  |  |  |  |  |  |  |  |  |
| 1963 |  |  |  |  |  |  |  |  |  |  |  |  |  |  |  | |  |  |  |  |  |  |  |  |  |  |  |  |
| 1964 |  |  |  |  |  |  |  |  |  |  |  |  |  |  |  | |  |  |  |  |  |  |  |  |  |  |  |  |
| 1965 |  |  |  |  |  |  |  |  |  |  |  |  |  |  |  | |  |  |  |  |  |  |  |  |  |  |  |  |
| 1966 |  |  |  |  |  |  |  |  |  |  |  |  |  |  |  | |  |  |  |  |  |  |  |  |  |  |  |  |
| 1967 |  |  |  |  |  |  |  |  |  |  |  |  |  |  |  | |  |  |  |  |  |  |  |  |  |  |  |  |
| 1968 |  |  |  |  |  |  |  |  |  |  |  |  |  |  |  | |  |  |  |  |  |  |  |  |  |  |  |  |
| 1969 |  |  |  |  |  |  |  |  |  |  |  |  |  |  |  | |  |  |  |  |  |  |  |  |  |  |  |  |
| 1970 |  |  |  |  |  |  |  |  |  |  |  |  |  |  |  | |  |  |  |  |  |  |  |  |  |  |  |  |
| 1971 |  |  |  |  |  |  |  |  |  |  |  |  |  |  |  | |  |  |  |  |  |  |  |  |  |  |  |  |
| 1972 |  |  |  |  |  |  |  |  |  |  |  |  |  |  |  | |  |  |  |  |  |  |  |  |  |  |  |  |
| 1973 |  |  |  |  |  |  |  |  |  |  |  |  |  |  |  | |  |  |  |  |  |  |  |  |  |  |  |  |
| 1974 |  |  |  |  |  |  |  |  |  |  |  |  |  |  |  | |  |  |  |  |  |  |  |  |  |  |  |  |
| 1975 |  |  |  |  |  |  |  |  |  |  |  |  |  |  |  | |  |  |  |  |  |  |  |  |  |  |  |  |
| 1976 |  |  |  |  |  |  |  |  |  |  |  |  |  |  |  | |  |  |  |  |  |  |  |  |  |  |  |  |
| 1977 |  |  |  |  |  |  |  |  |  |  |  |  |  |  |  | |  |  |  |  |  |  |  |  |  |  |  |  |
| 1978 |  |  |  |  |  |  |  |  |  |  |  |  |  |  |  | |  |  |  |  |  |  |  |  |  |  |  |  |
| 1979 |  |  |  |  |  |  |  |  |  |  |  |  |  |  |  | |  |  |  |  |  |  |  |  |  |  |  |  |
| 1980 |  |  |  |  |  |  |  |  |  |  |  |  |  |  |  | |  |  |  |  |  |  |  |  |  |  |  |  |
| 1981 |  |  |  |  |  |  |  |  |  |  |  |  |  |  |  | |  |  |  |  |  |  |  |  |  |  |  |  |
| 1982 |  |  |  |  |  |  |  |  |  |  |  |  |  |  |  | |  |  |  |  |  |  |  |  |  |  |  |  |
| 1983 |  |  |  |  |  |  |  |  |  |  |  |  |  |  |  | |  |  |  |  |  |  |  |  |  |  |  |  |
| 1984 |  |  |  |  |  |  |  |  |  |  |  |  |  |  |  | |  |  |  |  |  |  |  |  |  |  |  |  |
| 1985 |  |  |  |  |  |  |  |  |  |  |  |  |  |  |  | |  |  |  |  |  |  |  |  |  |  |  |  |
| 1986 |  |  |  |  |  |  |  |  |  |  |  |  |  |  |  | |  |  |  |  |  |  |  |  |  |  |  |  |
| 1987 |  |  |  |  |  |  |  |  |  |  |  |  |  |  |  | |  |  |  |  |  |  |  |  |  |  |  |  |
| 1988 |  |  |  |  |  |  |  |  |  |  |  |  |  |  |  | |  |  |  |  |  |  |  |  |  |  |  |  |
| 1989 |  |  |  |  |  |  |  |  |  |  |  |  |  |  |  | |  |  |  |  |  |  |  |  |  |  |  |  |
| 1990 |  |  |  |  |  |  |  |  |  |  |  |  |  |  |  | |  |  |  |  |  |  |  |  |  |  |  |  |
| 1991 |  |  |  |  |  |  |  |  |  |  |  |  |  |  |  | |  |  |  |  |  |  |  |  |  |  |  |  |
| 1992 |  |  |  |  |  |  |  |  |  |  |  |  |  |  |  | |  |  |  |  |  |  |  |  |  |  |  |  |
| 1993 |  |  |  |  |  |  |  |  |  |  |  |  |  |  |  | |  |  |  |  |  |  |  |  |  |  |  |  |
| 1994 |  |  |  |  |  |  |  |  |  |  |  |  |  |  |  | |  |  |  |  |  |  |  |  |  |  |  |  |
| 1995 |  |  |  |  |  |  |  |  |  |  |  |  |  |  |  | |  |  |  |  |  |  |  |  |  |  |  |  |
| 1996 |  |  |  |  |  |  |  |  |  |  |  |  |  |  |  | |  |  |  |  |  |  |  |  |  |  |  |  |
| 1997 |  |  |  |  |  |  |  |  |  |  |  |  |  |  |  | |  |  |  |  |  |  |  |  |  |  |  |  |
| 1998 |  |  |  |  |  |  |  |  |  |  |  |  |  |  |  | |  |  |  |  |  |  |  |  |  |  |  |  |
| 1999 |  |  |  |  |  |  |  |  |  |  |  |  |  |  |  | |  |  |  |  |  |  |  |  |  |  |  |  |
| 2000 |  |  |  |  |  |  |  |  |  |  |  |  |  |  |  | |  |  |  |  |  |  |  |  |  |  |  |  |
| 2001 |  |  |  |  |  |  |  |  |  |  |  |  |  |  |  | |  |  |  |  |  |  |  |  |  |  |  |  |
| 2002 |  |  |  |  |  |  |  |  |  |  |  |  |  |  |  | |  |  |  |  |  |  |  |  |  |  |  |  |
| 2003 |  |  |  |  |  |  |  |  |  |  |  |  |  |  |  | |  |  |  |  |  |  |  |  |  |  |  |  |
| 2004 |  |  |  |  |  |  |  |  |  |  |  |  |  |  |  | |  |  |  |  |  |  |  |  |  |  |  |  |
| 2005 |  |  |  |  |  |  |  |  |  |  |  |  |  |  |  | |  |  |  |  |  |  |  |  |  |  |  |  |
| 2006 |  |  |  |  |  |  |  |  |  |  |  |  |  |  |  | |  |  |  |  |  |  |  |  |  |  |  |  |
| 2007 |  |  |  |  |  |  |  |  |  |  |  |  |  |  |  | |  |  |  |  |  |  |  |  |  |  |  |  |
| 2008 |  |  |  |  |  |  |  |  |  |  |  |  |  |  |  | |  |  |  |  |  |  |  |  |  |  |  |  |
| 2009 |  |  |  |  |  |  |  |  |  |  |  |  |  |  |  | |  |  |  |  |  |  |  |  |  |  |  |  |
| 2010 |  |  |  |  |  |  |  |  |  |  |  |  |  |  |  | |  |  |  |  |  |  |  |  |  |  |  |  |
| 2011 |  |  |  |  |  |  |  |  |  |  |  |  |  |  |  | |  |  |  |  |  |  |  |  |  |  |  |  |
| 2012 |  |  |  |  |  |  |  |  |  |  |  |  |  |  |  | |  |  |  |  |  |  |  |  |  |  |  |  |
| 2013 |  |  |  |  |  |  |  |  |  |  |  |  |  |  |  | |  |  |  |  |  |  |  |  |  |  |  |  |
| *Blue cell: complete data; orange cell: semi-missing data; grey cell: totally missing data* | | | | | | | | | | | | | | | | | | | | | | | | | | | | |

**Table S2.** Ahmetli station Kaplan-Meier survival estimates according to SPI-3

| Kaplan-Meier Wet to Dry (SPI3) | | | | | | |
| --- | --- | --- | --- | --- | --- | --- |
|  |  | n | events | median | 0.95LCL | 0.95UCL |
|  |  | 44 | 44 | 4.5 | 4 | 8 |
| time | n.risk | n.event | survival | std.err | lower 95% CL | upper 95% CL |
| 1 | 44 | 5 | 0.8864 | 0.0478 | 0.79738 | 0.985 |
| 2 | 39 | 5 | 0.7727 | 0.0632 | 0.65831 | 0.907 |
| 3 | 34 | 6 | 0.6364 | 0.0725 | 0.50898 | 0.796 |
| 4 | 28 | 6 | 0.5 | 0.0754 | 0.37209 | 0.672 |
| 5 | 22 | 3 | 0.4318 | 0.0747 | 0.30768 | 0.606 |
| 6 | 19 | 2 | 0.3864 | 0.0734 | 0.26624 | 0.561 |
| 7 | 17 | 2 | 0.3409 | 0.0715 | 0.22605 | 0.514 |
| 8 | 15 | 4 | 0.25 | 0.0653 | 0.14986 | 0.417 |
| 9 | 11 | 2 | 0.2045 | 0.0608 | 0.11422 | 0.366 |
| 10 | 9 | 2 | 0.1591 | 0.0551 | 0.08065 | 0.314 |
| 14 | 7 | 1 | 0.1364 | 0.0517 | 0.06483 | 0.287 |
| 15 | 6 | 1 | 0.1136 | 0.0478 | 0.04979 | 0.259 |
| 17 | 5 | 1 | 0.0909 | 0.0433 | 0.03571 | 0.231 |
| 18 | 4 | 1 | 0.0682 | 0.038 | 0.02287 | 0.203 |
| 24 | 3 | 1 | 0.0455 | 0.0314 | 0.01174 | 0.176 |
| 25 | 2 | 1 | 0.0227 | 0.0225 | 0.00327 | 0.158 |
| 27 | 1 | 1 | 0 | NaN | NA | NA |

**Table S3.** Ahmetli station Kaplan-Meier survival estimates according to SPI-6

| Kaplan-Meier Wet to Dry (SPI6) | | | | | | |
| --- | --- | --- | --- | --- | --- | --- |
|  |  | n | events | median | 0.95LCL | 0.95UCL |
|  |  | 40 | 40 | 8.5 | 7 | 23 |
| time | n.risk | n.event | survival | std.err | lower 95% CL | upper 95% CL |
| 1 | 40 | 3 | 0.925 | 0.0416 | 0.84687 | 1 |
| 2 | 37 | 6 | 0.775 | 0.066 | 0.65582 | 0.916 |
| 3 | 31 | 3 | 0.7 | 0.0725 | 0.57147 | 0.857 |
| 6 | 28 | 2 | 0.65 | 0.0754 | 0.51779 | 0.816 |
| 7 | 26 | 3 | 0.575 | 0.0782 | 0.44051 | 0.751 |
| 8 | 23 | 3 | 0.5 | 0.0791 | 0.36676 | 0.682 |
| 9 | 20 | 3 | 0.425 | 0.0782 | 0.29638 | 0.609 |
| 10 | 17 | 1 | 0.4 | 0.0775 | 0.27367 | 0.585 |
| 11 | 16 | 1 | 0.375 | 0.0765 | 0.25135 | 0.559 |
| 19 | 15 | 1 | 0.35 | 0.0754 | 0.22943 | 0.534 |
| 23 | 14 | 2 | 0.3 | 0.0725 | 0.18687 | 0.482 |
| 24 | 12 | 1 | 0.275 | 0.0706 | 0.16627 | 0.455 |
| 25 | 11 | 1 | 0.25 | 0.0685 | 0.14616 | 0.428 |
| 28 | 10 | 1 | 0.225 | 0.066 | 0.12659 | 0.4 |
| 30 | 9 | 1 | 0.2 | 0.0632 | 0.10761 | 0.372 |
| 36 | 8 | 1 | 0.175 | 0.0601 | 0.08929 | 0.343 |
| 37 | 7 | 1 | 0.15 | 0.0565 | 0.07173 | 0.314 |
| 38 | 6 | 1 | 0.125 | 0.0523 | 0.05506 | 0.284 |
| 39 | 5 | 1 | 0.1 | 0.0474 | 0.03947 | 0.253 |
| 40 | 4 | 1 | 0.075 | 0.0416 | 0.02526 | 0.223 |
| 41 | 3 | 1 | 0.05 | 0.0345 | 0.01295 | 0.193 |
| 42 | 2 | 1 | 0.025 | 0.0247 | 0.00361 | 0.173 |
| 43 | 1 | 1 | 0 | NaN | NA | NA |

**Table S4.** Ahmetli station Kaplan-Meier survival estimates according to SPI-12

| Kaplan-Meier Wet to Dry (SPI12) | | | | | | |
| --- | --- | --- | --- | --- | --- | --- |
|  |  | n | events | median | 0.95LCL | 0.95UCL |
|  |  | 26 | 26 | 64.5 | 14 | 70 |
| time | n.risk | n.event | survival | std.err | lower 95% CL | upper 95% CL |
| 2 | 26 | 1 | 0.9615 | 0.0377 | 0.89039 | 1 |
| 3 | 25 | 1 | 0.9231 | 0.0523 | 0.82613 | 1 |
| 9 | 24 | 2 | 0.8462 | 0.0708 | 0.71824 | 0.997 |
| 10 | 22 | 1 | 0.8077 | 0.0773 | 0.66956 | 0.974 |
| 11 | 21 | 1 | 0.7692 | 0.0826 | 0.62319 | 0.949 |
| 12 | 20 | 1 | 0.7308 | 0.087 | 0.5787 | 0.923 |
| 13 | 19 | 1 | 0.6923 | 0.0905 | 0.53581 | 0.895 |
| 14 | 18 | 1 | 0.6538 | 0.0933 | 0.49433 | 0.865 |
| 15 | 17 | 1 | 0.6154 | 0.0954 | 0.45412 | 0.834 |
| 16 | 16 | 1 | 0.5769 | 0.0969 | 0.41511 | 0.802 |
| 63 | 15 | 1 | 0.5385 | 0.0978 | 0.37723 | 0.769 |
| 64 | 14 | 1 | 0.5 | 0.0981 | 0.34044 | 0.734 |
| 65 | 13 | 1 | 0.4615 | 0.0978 | 0.30472 | 0.699 |
| 66 | 12 | 1 | 0.4231 | 0.0969 | 0.27007 | 0.663 |
| 67 | 11 | 1 | 0.3846 | 0.0954 | 0.23652 | 0.625 |
| 68 | 10 | 1 | 0.3462 | 0.0933 | 0.2041 | 0.587 |
| 69 | 9 | 1 | 0.3077 | 0.0905 | 0.17287 | 0.548 |
| 70 | 8 | 2 | 0.2308 | 0.0826 | 0.11439 | 0.466 |
| 71 | 6 | 1 | 0.1923 | 0.0773 | 0.08747 | 0.423 |
| 72 | 5 | 1 | 0.1538 | 0.0708 | 0.06246 | 0.379 |
| 73 | 4 | 1 | 0.1154 | 0.0627 | 0.0398 | 0.334 |
| 74 | 3 | 1 | 0.0769 | 0.0523 | 0.02031 | 0.291 |
| 82 | 2 | 1 | 0.0385 | 0.0377 | 0.00563 | 0.263 |
| 83 | 1 | 1 | 0 | NaN | NA | NA |

**Table S5.** Ahmetli station Kaplan-Meier drought risk estimates according to SPI-3. 6. and 12

| Drought Risk (SPI3) | | Drought Risk (SPI6) | | Drought Risk (SPI12) | |
| --- | --- | --- | --- | --- | --- |
| Time | Drought Risk | Time | Drought Risk | Time | Drought Risk |
| 1 | 0.1136 | 1 | 0.075 | 2 | 0.0385 |
| 2 | 0.2273 | 2 | 0.225 | 3 | 0.0769 |
| 3 | 0.3636 | 3 | 0.3 | 6 | 0.11535 |
| 4 | 0.5 | 6 | 0.35 | 9 | 0.1538 |
| 5 | 0.5682 | 7 | 0.425 | 10 | 0.1923 |
| 6 | 0.6136 | 8 | 0.5 | 11 | 0.2308 |
| 7 | 0.6591 | 9 | 0.575 | 12 | 0.2692 |
| 8 | 0.75 | 10 | 0.6 | 13 | 0.3077 |
| 9 | 0.7955 | 11 | 0.625 | 14 | 0.3462 |
| 10 | 0.8409 | 12 | 0.628125 | 15 | 0.3846 |
| 11 | 0.846575 | 19 | 0.65 | 16 | 0.4231 |
| 12 | 0.85225 | 23 | 0.7 | 63 | 0.4615 |
| 14 | 0.8636 | 24 | 0.725 | 64 | 0.5 |
| 15 | 0.8864 | 25 | 0.75 | 65 | 0.5385 |
| 17 | 0.9091 | 28 | 0.775 | 66 | 0.5769 |
| 18 | 0.9318 | 30 | 0.8 | 67 | 0.6154 |
| 24 | 0.9545 | 36 | 0.825 | 68 | 0.6538 |
| 25 | 0.9773 | 37 | 0.85 | 69 | 0.6923 |
| 27 | 1 | 38 | 0.875 | 70 | 0.7692 |
|  |  | 39 | 0.9 | 71 | 0.8077 |
|  |  | 40 | 0.925 | 72 | 0.8462 |
|  |  | 41 | 0.95 | 73 | 0.8846 |
|  |  | 42 | 0.975 | 74 | 0.9231 |
|  |  | 43 | 1 | 82 | 0.9615 |
|  |  |  |  | 83 | 1 |

**Table S6.** Ahmetli station Kaplan-Meier survival estimates according to SPEI-3

| Kaplan-Meier Wet to Dry (SPEI3) | | | | | | |
| --- | --- | --- | --- | --- | --- | --- |
|  |  | n | events | median | 0.95LCL | 0.95UCL |
|  |  | 47 | 47 | 8 | 5 | 10 |
| time | n.risk | n.event | survival | std.err | lower 95% CI | upper 95% CI |
| 1 | 47 | 5 | 0.8936 | 0.045 | 0.80968 | 0.986 |
| 2 | 42 | 3 | 0.8298 | 0.0548 | 0.72901 | 0.944 |
| 3 | 39 | 4 | 0.7447 | 0.0636 | 0.6299 | 0.88 |
| 4 | 35 | 5 | 0.6383 | 0.0701 | 0.51471 | 0.792 |
| 5 | 30 | 3 | 0.5745 | 0.0721 | 0.44916 | 0.735 |
| 6 | 27 | 1 | 0.5532 | 0.0725 | 0.42785 | 0.715 |
| 7 | 26 | 2 | 0.5106 | 0.0729 | 0.38598 | 0.676 |
| 8 | 24 | 3 | 0.4468 | 0.0725 | 0.32506 | 0.614 |
| 9 | 21 | 3 | 0.383 | 0.0709 | 0.26643 | 0.551 |
| 10 | 18 | 4 | 0.2979 | 0.0667 | 0.19205 | 0.462 |
| 11 | 14 | 1 | 0.2766 | 0.0652 | 0.1742 | 0.439 |
| 12 | 13 | 2 | 0.234 | 0.0618 | 0.13953 | 0.393 |
| 13 | 11 | 1 | 0.2128 | 0.0597 | 0.12277 | 0.369 |
| 14 | 10 | 1 | 0.1915 | 0.0574 | 0.10642 | 0.345 |
| 15 | 9 | 1 | 0.1702 | 0.0548 | 0.09054 | 0.32 |
| 16 | 8 | 1 | 0.1489 | 0.0519 | 0.0752 | 0.295 |
| 17 | 7 | 2 | 0.1064 | 0.045 | 0.04645 | 0.244 |
| 18 | 5 | 1 | 0.0851 | 0.0407 | 0.03333 | 0.217 |
| 25 | 4 | 2 | 0.0426 | 0.0294 | 0.01096 | 0.165 |
| 26 | 2 | 1 | 0.0213 | 0.021 | 0.00306 | 0.148 |
| 27 | 1 | 1 | 0 | NaN | NA | NA |

**Table S7.** Ahmetli station Kaplan-Meier survival estimates according to SPEI-6

| Kaplan-Meier Wet to Dry (SPEI6) | | | | | | |
| --- | --- | --- | --- | --- | --- | --- |
|  |  | n | events | median | 0.95LCL | 0.95UCL |
|  |  | 45 | 45 | 18 | 6 | 26 |
| time | n.risk | n.event | survival | std.err | lower 95% CI | upper 95% CI |
| 1 | 45 | 4 | 0.9111 | 0.0424 | 0.8316 | 0.998 |
| 2 | 41 | 4 | 0.8222 | 0.057 | 0.7178 | 0.942 |
| 3 | 37 | 2 | 0.7778 | 0.062 | 0.6653 | 0.909 |
| 4 | 35 | 1 | 0.7556 | 0.0641 | 0.6399 | 0.892 |
| 5 | 34 | 2 | 0.7111 | 0.0676 | 0.5903 | 0.857 |
| 6 | 32 | 4 | 0.6222 | 0.0723 | 0.4955 | 0.781 |
| 7 | 28 | 1 | 0.6 | 0.073 | 0.4727 | 0.762 |
| 9 | 27 | 1 | 0.5778 | 0.0736 | 0.4501 | 0.742 |
| 14 | 26 | 1 | 0.5556 | 0.0741 | 0.4278 | 0.721 |
| 17 | 25 | 1 | 0.5333 | 0.0744 | 0.4058 | 0.701 |
| 18 | 24 | 2 | 0.4889 | 0.0745 | 0.3626 | 0.659 |
| 19 | 22 | 1 | 0.4667 | 0.0744 | 0.3415 | 0.638 |
| 20 | 21 | 1 | 0.4444 | 0.0741 | 0.3206 | 0.616 |
| 21 | 20 | 1 | 0.4222 | 0.0736 | 0.3 | 0.594 |
| 22 | 19 | 1 | 0.4 | 0.073 | 0.2797 | 0.572 |
| 23 | 18 | 1 | 0.3778 | 0.0723 | 0.2597 | 0.55 |
| 24 | 17 | 1 | 0.3556 | 0.0714 | 0.2399 | 0.527 |
| 25 | 16 | 1 | 0.3333 | 0.0703 | 0.2205 | 0.504 |
| 26 | 15 | 1 | 0.3111 | 0.069 | 0.2014 | 0.481 |
| 27 | 14 | 1 | 0.2889 | 0.0676 | 0.1827 | 0.457 |
| 28 | 13 | 1 | 0.2667 | 0.0659 | 0.1643 | 0.433 |
| 29 | 12 | 2 | 0.2222 | 0.062 | 0.1286 | 0.384 |
| 30 | 10 | 1 | 0.2 | 0.0596 | 0.1115 | 0.359 |
| 31 | 9 | 1 | 0.1778 | 0.057 | 0.0948 | 0.333 |
| 32 | 8 | 1 | 0.1556 | 0.054 | 0.0787 | 0.307 |
| 38 | 7 | 1 | 0.1333 | 0.0507 | 0.0633 | 0.281 |
| 39 | 6 | 1 | 0.1111 | 0.0468 | 0.0486 | 0.254 |
| 40 | 5 | 1 | 0.0889 | 0.0424 | 0.0349 | 0.227 |
| 41 | 4 | 1 | 0.0667 | 0.0372 | 0.0223 | 0.199 |
| 42 | 3 | 1 | 0.0444 | 0.0307 | 0.0115 | 0.172 |
| 43 | 2 | 1 | 0.0222 | 0.022 | 0.0032 | 0.154 |
| 62 | 1 | 1 | 0 | NaN | NA | NA |

**Table S8.** Ahmetli station Kaplan-Meier survival estimates according to SPEI-12

| Kaplan-Meier Wet to Dry (SPEI12) | | | | | | |
| --- | --- | --- | --- | --- | --- | --- |
|  |  | n | events | median | 0.95LCL | 0.95UCL |
|  |  | 42 | 42 | 34.5 | 8 | 64 |
| time | n.risk | n.event | survival | std.err | lower 95% CI | upper 95% CI |
| 2 | 42 | 3 | 0.9286 | 0.0397 | 0.85386 | 1.000 |
| 3 | 39 | 4 | 0.8333 | 0.0575 | 0.72791 | 0.954 |
| 4 | 35 | 2 | 0.7857 | 0.0633 | 0.67092 | 0.92 |
| 5 | 33 | 2 | 0.7381 | 0.0678 | 0.61642 | 0.884 |
| 6 | 31 | 3 | 0.6667 | 0.0727 | 0.53831 | 0.826 |
| 7 | 28 | 1 | 0.6429 | 0.0739 | 0.51312 | 0.805 |
| 8 | 27 | 1 | 0.619 | 0.0749 | 0.4883 | 0.785 |
| 24 | 26 | 1 | 0.5952 | 0.0757 | 0.46386 | 0.764 |
| 25 | 25 | 1 | 0.5714 | 0.0764 | 0.43976 | 0.743 |
| 26 | 24 | 1 | 0.5476 | 0.0768 | 0.41601 | 0.721 |
| 27 | 23 | 1 | 0.5238 | 0.0771 | 0.39259 | 0.699 |
| 28 | 22 | 1 | 0.5 | 0.0772 | 0.36951 | 0.677 |
| 41 | 21 | 1 | 0.4762 | 0.0771 | 0.34676 | 0.654 |
| 42 | 20 | 1 | 0.4524 | 0.0768 | 0.32434 | 0.631 |
| 43 | 19 | 1 | 0.4286 | 0.0764 | 0.30225 | 0.608 |
| 60 | 18 | 1 | 0.4048 | 0.0757 | 0.28049 | 0.584 |
| 61 | 17 | 1 | 0.381 | 0.0749 | 0.25908 | 0.56 |
| 62 | 16 | 1 | 0.3571 | 0.0739 | 0.23803 | 0.536 |
| 63 | 15 | 1 | 0.3333 | 0.0727 | 0.21734 | 0.511 |
| 64 | 14 | 1 | 0.3095 | 0.0713 | 0.19703 | 0.486 |
| 65 | 13 | 1 | 0.2857 | 0.0697 | 0.17712 | 0.461 |
| 66 | 12 | 1 | 0.2619 | 0.0678 | 0.15763 | 0.435 |
| 67 | 11 | 1 | 0.2381 | 0.0657 | 0.13861 | 0.409 |
| 68 | 10 | 1 | 0.2143 | 0.0633 | 0.12009 | 0.382 |
| 69 | 9 | 1 | 0.1905 | 0.0606 | 0.10211 | 0.355 |
| 70 | 8 | 1 | 0.1667 | 0.0575 | 0.08475 | 0.328 |
| 71 | 7 | 1 | 0.1429 | 0.054 | 0.0681 | 0.3 |
| 72 | 6 | 2 | 0.0952 | 0.0453 | 0.0375 | 0.242 |
| 73 | 4 | 1 | 0.0714 | 0.0397 | 0.02401 | 0.213 |
| 74 | 3 | 1 | 0.0476 | 0.0329 | 0.01231 | 0.184 |
| 75 | 2 | 1 | 0.0238 | 0.0235 | 0.00343 | 0.165 |
| 76 | 1 | 1 | 0 | NaN | NA | NA |

**Table S9.** Ahmetli station Kaplan-Meier drought risk estimates according to SPEI-3, 6, and 12

| Drought Risk (SPEI3) | | Drought Risk (SPEI6) | | Drought Risk (SPEI12) | |
| --- | --- | --- | --- | --- | --- |
| Time | Drought Risk | Time | Drought Risk | Time | Drought Risk |
| 1 | 0.1064 | 1 | 0.0889 | 2 | 0.0714 |
| 2 | 0.1702 | 2 | 0.1778 | 3 | 0.1667 |
| 3 | 0.2553 | 3 | 0.2222 | 4 | 0.2143 |
| 4 | 0.3617 | 4 | 0.2444 | 5 | 0.2619 |
| 5 | 0.4255 | 5 | 0.2889 | 6 | 0.3333 |
| 6 | 0.4468 | 6 | 0.3778 | 7 | 0.3571 |
| 7 | 0.4894 | 7 | 0.4 | 8 | 0.381 |
| 8 | 0.5532 | 9 | 0.4222 | 12 | 0.38695 |
| 9 | 0.617 | 12 | 0.43552 | 24 | 0.4048 |
| 10 | 0.7021 | 14 | 0.4444 | 25 | 0.4286 |
| 11 | 0.7234 | 17 | 0.4667 | 26 | 0.4524 |
| 12 | 0.766 | 18 | 0.5111 | 27 | 0.4762 |
| 13 | 0.7872 | 19 | 0.5333 | 28 | 0.5 |
| 14 | 0.8085 | 20 | 0.5556 | 41 | 0.5238 |
| 15 | 0.8298 | 21 | 0.5778 | 42 | 0.5476 |
| 16 | 0.8511 | 22 | 0.6 | 43 | 0.5714 |
| 17 | 0.8936 | 23 | 0.6222 | 60 | 0.5952 |
| 18 | 0.9149 | 24 | 0.6444 | 61 | 0.619 |
| 25 | 0.9574 | 25 | 0.6667 | 62 | 0.6429 |
| 26 | 0.9787 | 26 | 0.6889 | 63 | 0.6667 |
| 27 | 1 | 27 | 0.7111 | 64 | 0.6905 |
|  |  | 28 | 0.7333 | 65 | 0.7143 |
|  |  | 29 | 0.7778 | 66 | 0.7381 |
|  |  | 30 | 0.8 | 67 | 0.7619 |
|  |  | 31 | 0.8222 | 68 | 0.7857 |
|  |  | 32 | 0.8444 | 69 | 0.8095 |
|  |  | 38 | 0.8667 | 70 | 0.8333 |
|  |  | 39 | 0.8889 | 71 | 0.8571 |
|  |  | 40 | 0.9111 | 72 | 0.9048 |
|  |  | 41 | 0.9333 | 73 | 0.9286 |
|  |  | 42 | 0.9556 | 74 | 0.9524 |
|  |  | 43 | 0.9778 | 75 | 0.9762 |
|  |  | 62 | 1 | 76 | 1 |

**Table S10.** Akhisar station Kaplan-Meier survival estimates according to SPI-3

| Kaplan-Meier Wet to Dry (SPI3) | | | | | | |
| --- | --- | --- | --- | --- | --- | --- |
|  |  | n | events | median | 0.95LCL | 0.95UCL |
|  |  | 143 | 143 | 10 | 8 | 12 |
| time | n.risk | n.event | survival | std.err | lower 95% CL | upper 95% CL |
| 1 | 143 | 6 | 0.95804 | 0.01677 | 0.925738 | 0.9915 |
| 2 | 137 | 6 | 0.91608 | 0.02319 | 0.871749 | 0.9627 |
| 3 | 131 | 10 | 0.84615 | 0.03017 | 0.789037 | 0.9074 |
| 4 | 121 | 12 | 0.76224 | 0.0356 | 0.695562 | 0.8353 |
| 5 | 109 | 9 | 0.6993 | 0.03835 | 0.62804 | 0.7786 |
| 6 | 100 | 5 | 0.66434 | 0.03949 | 0.591277 | 0.7464 |
| 7 | 95 | 12 | 0.58042 | 0.04127 | 0.504919 | 0.6672 |
| 8 | 83 | 5 | 0.54545 | 0.04164 | 0.469656 | 0.6335 |
| 9 | 78 | 6 | 0.5035 | 0.04181 | 0.42787 | 0.5925 |
| 10 | 72 | 8 | 0.44755 | 0.04158 | 0.373044 | 0.5369 |
| 11 | 64 | 5 | 0.41259 | 0.04117 | 0.339299 | 0.5017 |
| 12 | 59 | 6 | 0.37063 | 0.04039 | 0.299352 | 0.4589 |
| 13 | 53 | 5 | 0.33566 | 0.03949 | 0.266542 | 0.4227 |
| 14 | 48 | 1 | 0.32867 | 0.03928 | 0.260035 | 0.4154 |
| 15 | 47 | 5 | 0.29371 | 0.03809 | 0.227788 | 0.3787 |
| 16 | 42 | 5 | 0.25874 | 0.03662 | 0.196058 | 0.3415 |
| 17 | 37 | 6 | 0.21678 | 0.03446 | 0.158755 | 0.296 |
| 18 | 31 | 6 | 0.17483 | 0.03176 | 0.12245 | 0.2496 |
| 19 | 25 | 1 | 0.16783 | 0.03125 | 0.116513 | 0.2418 |
| 20 | 24 | 1 | 0.16084 | 0.03072 | 0.110612 | 0.2339 |
| 21 | 23 | 2 | 0.14685 | 0.0296 | 0.098927 | 0.218 |
| 22 | 21 | 2 | 0.13287 | 0.02838 | 0.087413 | 0.202 |
| 23 | 19 | 2 | 0.11888 | 0.02706 | 0.07609 | 0.1857 |
| 24 | 17 | 3 | 0.0979 | 0.02485 | 0.059528 | 0.161 |
| 25 | 14 | 2 | 0.08392 | 0.02319 | 0.048827 | 0.1442 |
| 26 | 12 | 3 | 0.06294 | 0.02031 | 0.033438 | 0.1185 |
| 27 | 9 | 2 | 0.04895 | 0.01804 | 0.023769 | 0.1008 |
| 33 | 7 | 1 | 0.04196 | 0.01677 | 0.019173 | 0.0918 |
| 34 | 6 | 1 | 0.03497 | 0.01536 | 0.01478 | 0.0827 |
| 35 | 5 | 1 | 0.02797 | 0.01379 | 0.010644 | 0.0735 |
| 43 | 4 | 1 | 0.02098 | 0.01198 | 0.006847 | 0.0643 |
| 44 | 3 | 1 | 0.01399 | 0.00982 | 0.003532 | 0.0554 |
| 45 | 2 | 1 | 0.00699 | 0.00697 | 0.000992 | 0.0493 |
| 46 | 1 | 1 | 0 | NaN | NA | NA |

**Table S11.** Akhisar station Kaplan-Meier survival estimates according to SPI-6

| Kaplan-Meier Wet to Dry (SPI6) | | | | | | |
| --- | --- | --- | --- | --- | --- | --- |
|  |  | n | events | median | 0.95LCL | 0.95UCL |
|  |  | 145 | 145 | 15 | 12 | 17 |
| time | n.risk | n.event | survival | std.err | lower 95% CL | upper 95% CL |
| 1 | 145 | 12 | 0.9172 | 0.02288 | 0.873475 | 0.9632 |
| 2 | 133 | 9 | 0.8552 | 0.02923 | 0.799767 | 0.9144 |
| 3 | 124 | 5 | 0.8207 | 0.03186 | 0.760567 | 0.8856 |
| 4 | 119 | 7 | 0.7724 | 0.03482 | 0.707098 | 0.8438 |
| 5 | 112 | 4 | 0.7448 | 0.0362 | 0.677144 | 0.8193 |
| 6 | 108 | 4 | 0.7172 | 0.0374 | 0.647562 | 0.7944 |
| 7 | 104 | 3 | 0.6966 | 0.03818 | 0.6256 | 0.7756 |
| 8 | 101 | 4 | 0.669 | 0.03908 | 0.596592 | 0.7501 |
| 9 | 97 | 4 | 0.6414 | 0.03983 | 0.567881 | 0.7244 |
| 10 | 93 | 4 | 0.6138 | 0.04043 | 0.539448 | 0.6984 |
| 11 | 89 | 3 | 0.5931 | 0.0408 | 0.518299 | 0.6787 |
| 12 | 86 | 4 | 0.5655 | 0.04116 | 0.490327 | 0.6522 |
| 13 | 82 | 5 | 0.531 | 0.04144 | 0.455715 | 0.6188 |
| 14 | 77 | 4 | 0.5034 | 0.04152 | 0.428304 | 0.5918 |
| 15 | 73 | 5 | 0.469 | 0.04144 | 0.394385 | 0.5577 |
| 16 | 68 | 4 | 0.4414 | 0.04124 | 0.367525 | 0.5301 |
| 17 | 64 | 6 | 0.4 | 0.04068 | 0.327706 | 0.4882 |
| 18 | 58 | 6 | 0.3586 | 0.03983 | 0.28847 | 0.4458 |
| 19 | 52 | 3 | 0.3379 | 0.03928 | 0.269082 | 0.4244 |
| 20 | 49 | 3 | 0.3172 | 0.03865 | 0.249855 | 0.4028 |
| 21 | 46 | 2 | 0.3034 | 0.03818 | 0.23713 | 0.3883 |
| 22 | 44 | 2 | 0.2897 | 0.03767 | 0.224483 | 0.3737 |
| 23 | 42 | 3 | 0.269 | 0.03682 | 0.205664 | 0.3518 |
| 24 | 39 | 2 | 0.2552 | 0.0362 | 0.193225 | 0.337 |
| 25 | 37 | 2 | 0.2414 | 0.03554 | 0.180877 | 0.3221 |
| 26 | 35 | 3 | 0.2207 | 0.03444 | 0.162535 | 0.2997 |
| 27 | 32 | 2 | 0.2069 | 0.03364 | 0.150436 | 0.2845 |
| 28 | 30 | 2 | 0.1931 | 0.03278 | 0.13845 | 0.2693 |
| 29 | 28 | 3 | 0.1724 | 0.03137 | 0.120698 | 0.2463 |
| 30 | 25 | 2 | 0.1586 | 0.03034 | 0.109033 | 0.2308 |
| 31 | 23 | 2 | 0.1448 | 0.02923 | 0.097517 | 0.2151 |
| 32 | 21 | 1 | 0.1379 | 0.02864 | 0.091821 | 0.2072 |
| 33 | 20 | 1 | 0.131 | 0.02802 | 0.086169 | 0.1993 |
| 34 | 19 | 1 | 0.1241 | 0.02738 | 0.080564 | 0.1913 |
| 35 | 18 | 2 | 0.1103 | 0.02602 | 0.069508 | 0.1752 |
| 36 | 16 | 2 | 0.0966 | 0.02453 | 0.058685 | 0.1589 |
| 37 | 14 | 2 | 0.0828 | 0.02288 | 0.048137 | 0.1423 |
| 38 | 12 | 3 | 0.0621 | 0.02004 | 0.032968 | 0.1169 |
| 39 | 9 | 1 | 0.0552 | 0.01896 | 0.028132 | 0.1082 |
| 40 | 8 | 2 | 0.0414 | 0.01654 | 0.018904 | 0.0906 |
| 44 | 6 | 1 | 0.0345 | 0.01515 | 0.014573 | 0.0816 |
| 45 | 5 | 1 | 0.0276 | 0.0136 | 0.010495 | 0.0725 |
| 46 | 4 | 1 | 0.0207 | 0.01182 | 0.006752 | 0.0634 |
| 47 | 3 | 1 | 0.0138 | 0.00969 | 0.003483 | 0.0546 |
| 48 | 2 | 1 | 0.0069 | 0.00687 | 0.000978 | 0.0486 |
| 77 | 1 | 1 | 0 | NaN | NA | NA |

**Table S12.** Akhisar station Kaplan-Meier survival estimates according to SPI-12

| Kaplan-Meier Wet to Dry (SPI3) | | | | | | |
| --- | --- | --- | --- | --- | --- | --- |
|  |  | n | events | median | 0.95LCL | 0.95UCL |
|  |  | 156 | 156 | 22 | 18 | 25 |
| time | n.risk | n.event | survival | std.err | lower 95% CL | upper 95% CL |
| 1 | 156 | 7 | 0.95513 | 0.01658 | 0.923188 | 0.9882 |
| 2 | 149 | 9 | 0.89744 | 0.02429 | 0.851068 | 0.9463 |
| 3 | 140 | 6 | 0.85897 | 0.02787 | 0.806058 | 0.9154 |
| 4 | 134 | 5 | 0.82692 | 0.03029 | 0.769638 | 0.8885 |
| 5 | 129 | 4 | 0.80128 | 0.03195 | 0.741049 | 0.8664 |
| 6 | 125 | 3 | 0.78205 | 0.03305 | 0.719876 | 0.8496 |
| 7 | 122 | 3 | 0.76282 | 0.03406 | 0.69891 | 0.8326 |
| 8 | 119 | 5 | 0.73077 | 0.03551 | 0.664377 | 0.8038 |
| 9 | 114 | 4 | 0.70513 | 0.03651 | 0.637085 | 0.7804 |
| 10 | 110 | 1 | 0.69872 | 0.03673 | 0.630305 | 0.7746 |
| 11 | 109 | 2 | 0.6859 | 0.03716 | 0.616795 | 0.7627 |
| 12 | 107 | 2 | 0.67308 | 0.03756 | 0.603349 | 0.7509 |
| 13 | 105 | 3 | 0.65385 | 0.03809 | 0.583296 | 0.7329 |
| 14 | 102 | 2 | 0.64103 | 0.03841 | 0.570002 | 0.7209 |
| 15 | 100 | 4 | 0.61538 | 0.03895 | 0.543587 | 0.6967 |
| 16 | 96 | 3 | 0.59615 | 0.03928 | 0.523922 | 0.6783 |
| 17 | 93 | 3 | 0.57692 | 0.03956 | 0.504379 | 0.6599 |
| 18 | 90 | 3 | 0.55769 | 0.03976 | 0.484956 | 0.6413 |
| 19 | 87 | 3 | 0.53846 | 0.03991 | 0.46565 | 0.6227 |
| 20 | 84 | 2 | 0.52564 | 0.03998 | 0.452844 | 0.6101 |
| 21 | 82 | 2 | 0.51282 | 0.04002 | 0.440089 | 0.5976 |
| 22 | 80 | 4 | 0.48718 | 0.04002 | 0.414732 | 0.5723 |
| 23 | 76 | 4 | 0.46154 | 0.03991 | 0.38958 | 0.5468 |
| 24 | 72 | 4 | 0.4359 | 0.0397 | 0.364634 | 0.5211 |
| 25 | 68 | 5 | 0.40385 | 0.03928 | 0.333744 | 0.4887 |
| 26 | 63 | 1 | 0.39744 | 0.03918 | 0.327606 | 0.4821 |
| 27 | 62 | 3 | 0.37821 | 0.03883 | 0.309274 | 0.4625 |
| 28 | 59 | 1 | 0.37179 | 0.03869 | 0.303191 | 0.4559 |
| 29 | 58 | 1 | 0.36538 | 0.03855 | 0.297122 | 0.4493 |
| 30 | 57 | 1 | 0.35897 | 0.03841 | 0.291067 | 0.4427 |
| 31 | 56 | 1 | 0.35256 | 0.03825 | 0.285027 | 0.4361 |
| 32 | 55 | 1 | 0.34615 | 0.03809 | 0.279001 | 0.4295 |
| 33 | 54 | 1 | 0.33974 | 0.03792 | 0.272989 | 0.4228 |
| 34 | 53 | 1 | 0.33333 | 0.03774 | 0.266993 | 0.4162 |
| 35 | 52 | 2 | 0.32051 | 0.03736 | 0.255045 | 0.4028 |
| 36 | 50 | 2 | 0.30769 | 0.03695 | 0.243159 | 0.3894 |
| 37 | 48 | 2 | 0.29487 | 0.03651 | 0.231338 | 0.3759 |
| 38 | 46 | 3 | 0.27564 | 0.03578 | 0.21373 | 0.3555 |
| 39 | 43 | 2 | 0.26282 | 0.03524 | 0.202079 | 0.3418 |
| 40 | 41 | 2 | 0.25 | 0.03467 | 0.190502 | 0.3281 |
| 41 | 39 | 2 | 0.23718 | 0.03406 | 0.179002 | 0.3143 |
| 42 | 37 | 2 | 0.22436 | 0.0334 | 0.167582 | 0.3004 |
| 43 | 35 | 2 | 0.21154 | 0.0327 | 0.156249 | 0.2864 |
| 44 | 33 | 2 | 0.19872 | 0.03195 | 0.145006 | 0.2723 |
| 45 | 31 | 2 | 0.1859 | 0.03115 | 0.133862 | 0.2582 |
| 46 | 29 | 2 | 0.17308 | 0.03029 | 0.122822 | 0.2439 |
| 47 | 27 | 1 | 0.16667 | 0.02984 | 0.117344 | 0.2367 |
| 71 | 26 | 1 | 0.16026 | 0.02937 | 0.111895 | 0.2295 |
| 72 | 25 | 2 | 0.14744 | 0.02839 | 0.101093 | 0.215 |
| 73 | 23 | 2 | 0.13462 | 0.02733 | 0.090428 | 0.2004 |
| 74 | 21 | 2 | 0.12179 | 0.02618 | 0.079915 | 0.1856 |
| 75 | 19 | 2 | 0.10897 | 0.02495 | 0.069575 | 0.1707 |
| 76 | 17 | 2 | 0.09615 | 0.0236 | 0.059432 | 0.1556 |
| 77 | 15 | 2 | 0.08333 | 0.02213 | 0.049521 | 0.1402 |
| 78 | 13 | 2 | 0.07051 | 0.0205 | 0.039887 | 0.1247 |
| 79 | 11 | 2 | 0.05769 | 0.01867 | 0.030598 | 0.1088 |
| 80 | 9 | 2 | 0.04487 | 0.01658 | 0.021755 | 0.0926 |
| 81 | 7 | 2 | 0.03205 | 0.0141 | 0.013531 | 0.0759 |
| 82 | 5 | 1 | 0.02564 | 0.01266 | 0.009746 | 0.0675 |
| 83 | 4 | 1 | 0.01923 | 0.011 | 0.006271 | 0.059 |
| 84 | 3 | 1 | 0.01282 | 0.00901 | 0.003235 | 0.0508 |
| 98 | 2 | 1 | 0.00641 | 0.00639 | 0.000909 | 0.0452 |
| 118 | 1 | 1 | 0 | NaN | NA | NA |

**Table S13.** Akhisar station Kaplan-Meier drought risk estimates according to SPI-3, 6, and 12

| Drought Risk (SPI3) | | Drought Risk (SPI6) | | Drought Risk (SPI12) | |
| --- | --- | --- | --- | --- | --- |
| Time | Drought Risk | Time | Drought Risk | Time | Drought Risk |
| 1 | 0.04196 | 1 | 0.0828 | 1 | 0.04487 |
| 2 | 0.08392 | 2 | 0.1448 | 2 | 0.10256 |
| 3 | 0.15385 | 3 | 0.1793 | 3 | 0.14103 |
| 4 | 0.23776 | 4 | 0.2276 | 4 | 0.17308 |
| 5 | 0.3007 | 5 | 0.2552 | 5 | 0.19872 |
| 6 | 0.33566 | 6 | 0.2828 | 6 | 0.21795 |
| 7 | 0.41958 | 7 | 0.3034 | 7 | 0.23718 |
| 8 | 0.45455 | 8 | 0.331 | 8 | 0.26923 |
| 9 | 0.4965 | 9 | 0.3586 | 9 | 0.29487 |
| 10 | 0.55245 | 10 | 0.3862 | 10 | 0.30128 |
| 11 | 0.58741 | 11 | 0.4069 | 11 | 0.3141 |
| 12 | 0.62937 | 12 | 0.4345 | 12 | 0.32692 |
| 13 | 0.66434 | 13 | 0.469 | 13 | 0.34615 |
| 14 | 0.67133 | 14 | 0.4966 | 14 | 0.35897 |
| 15 | 0.70629 | 15 | 0.531 | 15 | 0.38462 |
| 16 | 0.74126 | 16 | 0.5586 | 16 | 0.40385 |
| 17 | 0.78322 | 17 | 0.6 | 17 | 0.42308 |
| 18 | 0.82517 | 18 | 0.6414 | 18 | 0.44231 |
| 19 | 0.83217 | 19 | 0.6621 | 19 | 0.46154 |
| 20 | 0.83916 | 20 | 0.6828 | 20 | 0.47436 |
| 21 | 0.85315 | 21 | 0.6966 | 21 | 0.48718 |
| 22 | 0.86713 | 22 | 0.7103 | 22 | 0.51282 |
| 23 | 0.88112 | 23 | 0.731 | 23 | 0.53846 |
| 24 | 0.9021 | 24 | 0.7448 | 24 | 0.5641 |
| 25 | 0.91608 | 25 | 0.7586 | 25 | 0.59615 |
| 26 | 0.93706 | 26 | 0.7793 | 26 | 0.60256 |
| 27 | 0.95105 | 27 | 0.7931 | 27 | 0.62179 |
| 33 | 0.95804 | 28 | 0.8069 | 28 | 0.62821 |
| 34 | 0.96503 | 29 | 0.8276 | 29 | 0.63462 |
| 35 | 0.97203 | 30 | 0.8414 | 30 | 0.64103 |
| 43 | 0.97902 | 31 | 0.8552 | 31 | 0.64744 |
| 44 | 0.98601 | 32 | 0.8621 | 32 | 0.65385 |
| 45 | 0.99301 | 33 | 0.869 | 33 | 0.66026 |
| 46 | 1 | 34 | 0.8759 | 34 | 0.66667 |
|  |  | 35 | 0.8897 | 35 | 0.67949 |
|  |  | 36 | 0.9034 | 36 | 0.69231 |
|  |  | 37 | 0.9172 | 37 | 0.70513 |
|  |  | 38 | 0.9379 | 38 | 0.72436 |
|  |  | 39 | 0.9448 | 39 | 0.73718 |
|  |  | 40 | 0.9586 | 40 | 0.75 |
|  |  | 44 | 0.9655 | 41 | 0.76282 |
|  |  | 45 | 0.9724 | 42 | 0.77564 |
|  |  | 46 | 0.9793 | 43 | 0.78846 |
|  |  | 47 | 0.9862 | 44 | 0.80128 |
|  |  | 48 | 0.9931 | 45 | 0.8141 |
|  |  | 77 | 1 | 46 | 0.82692 |
|  |  |  |  | 47 | 0.83333 |
|  |  |  |  | 71 | 0.83974 |
|  |  |  |  | 72 | 0.85256 |
|  |  |  |  | 73 | 0.86538 |
|  |  |  |  | 74 | 0.87821 |
|  |  |  |  | 75 | 0.89103 |
|  |  |  |  | 76 | 0.90385 |
|  |  |  |  | 77 | 0.91667 |
|  |  |  |  | 78 | 0.92949 |
|  |  |  |  | 79 | 0.94231 |
|  |  |  |  | 80 | 0.95513 |
|  |  |  |  | 81 | 0.96795 |
|  |  |  |  | 82 | 0.97436 |
|  |  |  |  | 83 | 0.98077 |
|  |  |  |  | 84 | 0.98718 |
|  |  |  |  | 98 | 0.99359 |
|  |  |  |  | 118 | 1 |

**Table S14.** Akhisar station Kaplan-Meier survival estimates according to SPEI-3

| Kaplan-Meier Wet to Dry (SPEI3) | | | | | | |
| --- | --- | --- | --- | --- | --- | --- |
|  |  | n | events | median | 0.95LCL | 0.95UCL |
|  |  | 151 | 151 | 8 | 7 | 10 |
| time | n.risk | n.event | survival | std.err | lower 95% CI | upper 95% CI |
| 0 | 151 | 1 | 0.99338 | 0.0066 | 0.980525 | 10.000 |
| 1 | 150 | 9 | 0.93377 | 0.0202 | 0.894942 | 0.9743 |
| 2 | 141 | 5 | 0.90066 | 0.0243 | 0.854195 | 0.9497 |
| 3 | 136 | 7 | 0.8543 | 0.0287 | 0.799846 | 0.9125 |
| 4 | 129 | 14 | 0.76159 | 0.0347 | 0.696569 | 0.8327 |
| 5 | 115 | 10 | 0.69536 | 0.0375 | 0.625696 | 0.7728 |
| 6 | 105 | 13 | 0.60927 | 0.0397 | 0.536215 | 0.6923 |
| 7 | 92 | 10 | 0.54305 | 0.0405 | 0.469132 | 0.6286 |
| 8 | 82 | 11 | 0.4702 | 0.0406 | 0.396965 | 0.5569 |
| 9 | 71 | 4 | 0.44371 | 0.0404 | 0.371139 | 0.5305 |
| 10 | 67 | 7 | 0.39735 | 0.0398 | 0.326487 | 0.4836 |
| 11 | 60 | 4 | 0.37086 | 0.0393 | 0.301293 | 0.4565 |
| 12 | 56 | 3 | 0.35099 | 0.0388 | 0.282557 | 0.436 |
| 13 | 53 | 5 | 0.31788 | 0.0379 | 0.251648 | 0.4015 |
| 14 | 48 | 5 | 0.28477 | 0.0367 | 0.221163 | 0.3667 |
| 15 | 43 | 4 | 0.25828 | 0.0356 | 0.197106 | 0.3384 |
| 16 | 39 | 6 | 0.21854 | 0.0336 | 0.16164 | 0.2955 |
| 17 | 33 | 4 | 0.19205 | 0.0321 | 0.138466 | 0.2664 |
| 18 | 29 | 5 | 0.15894 | 0.0298 | 0.110126 | 0.2294 |
| 19 | 24 | 3 | 0.13907 | 0.0282 | 0.093518 | 0.2068 |
| 20 | 21 | 2 | 0.12583 | 0.027 | 0.082641 | 0.1916 |
| 21 | 19 | 1 | 0.11921 | 0.0264 | 0.077269 | 0.1839 |
| 22 | 18 | 2 | 0.10596 | 0.025 | 0.06667 | 0.1684 |
| 23 | 16 | 1 | 0.09934 | 0.0243 | 0.061452 | 0.1606 |
| 24 | 15 | 1 | 0.09272 | 0.0236 | 0.056294 | 0.1527 |
| 25 | 14 | 1 | 0.08609 | 0.0228 | 0.051201 | 0.1448 |
| 26 | 13 | 2 | 0.07285 | 0.0211 | 0.041238 | 0.1287 |
| 27 | 11 | 1 | 0.06623 | 0.0202 | 0.036384 | 0.1205 |
| 28 | 10 | 1 | 0.0596 | 0.0193 | 0.031631 | 0.1123 |
| 29 | 9 | 1 | 0.05298 | 0.0182 | 0.026993 | 0.104 |
| 32 | 8 | 1 | 0.04636 | 0.0171 | 0.022488 | 0.0956 |
| 40 | 7 | 1 | 0.03974 | 0.0159 | 0.01814 | 0.087 |
| 41 | 6 | 1 | 0.03311 | 0.0146 | 0.013986 | 0.0784 |
| 42 | 5 | 1 | 0.02649 | 0.0131 | 0.010073 | 0.0697 |
| 49 | 4 | 1 | 0.01987 | 0.0114 | 0.006481 | 0.0609 |
| 50 | 3 | 1 | 0.01325 | 0.0093 | 0.003343 | 0.0525 |
| 51 | 2 | 1 | 0.00662 | 0.0066 | 0.000939 | 0.0467 |
| 52 | 1 | 1 | 0 | NaN | NA | NA |

**Table S15.** Akhisar station Kaplan-Meier survival estimates according to SPEI-6

| Kaplan-Meier Wet to Dry (SPEI6) | | | | | | |
| --- | --- | --- | --- | --- | --- | --- |
|  |  | n | events | median | 0.95LCL | 0.95UCL |
|  |  | 150 | 150 | 13 | 11 | 16 |
| time | n.risk | n.event | survival | std.err | lower 95% CI | upper 95% CI |
| 0 | 150 | 1 | 0.99333 | 0.00664 | 0.980396 | 10.000 |
| 1 | 149 | 9 | 0.93333 | 0.02037 | 0.894256 | 0.9741 |
| 2 | 140 | 12 | 0.85333 | 0.02889 | 0.798556 | 0.9119 |
| 3 | 128 | 7 | 0.80667 | 0.03224 | 0.745881 | 0.8724 |
| 4 | 121 | 5 | 0.77333 | 0.03418 | 0.709153 | 0.8433 |
| 5 | 116 | 2 | 0.76 | 0.03487 | 0.694637 | 0.8315 |
| 6 | 114 | 3 | 0.74 | 0.03581 | 0.673032 | 0.8136 |
| 7 | 111 | 5 | 0.70667 | 0.03717 | 0.637437 | 0.7834 |
| 8 | 106 | 5 | 0.67333 | 0.03829 | 0.602312 | 0.7527 |
| 9 | 101 | 6 | 0.63333 | 0.03935 | 0.560726 | 0.7153 |
| 10 | 95 | 6 | 0.59333 | 0.04011 | 0.519709 | 0.6774 |
| 11 | 89 | 5 | 0.56 | 0.04053 | 0.48594 | 0.6453 |
| 12 | 84 | 6 | 0.52 | 0.04079 | 0.445892 | 0.6064 |
| 13 | 78 | 5 | 0.48667 | 0.04081 | 0.412907 | 0.5736 |
| 14 | 73 | 6 | 0.44667 | 0.04059 | 0.373791 | 0.5338 |
| 15 | 67 | 4 | 0.42 | 0.0403 | 0.347998 | 0.5069 |
| 16 | 63 | 4 | 0.39333 | 0.03989 | 0.322438 | 0.4798 |
| 17 | 59 | 5 | 0.36 | 0.03919 | 0.290827 | 0.4456 |
| 18 | 54 | 5 | 0.32667 | 0.03829 | 0.259611 | 0.411 |
| 19 | 49 | 3 | 0.30667 | 0.03765 | 0.241082 | 0.3901 |
| 20 | 46 | 1 | 0.3 | 0.03742 | 0.23494 | 0.3831 |
| 21 | 45 | 2 | 0.28667 | 0.03692 | 0.222712 | 0.369 |
| 22 | 43 | 3 | 0.26667 | 0.03611 | 0.20451 | 0.3477 |
| 23 | 40 | 1 | 0.26 | 0.03581 | 0.198483 | 0.3406 |
| 24 | 39 | 3 | 0.24 | 0.03487 | 0.180524 | 0.3191 |
| 25 | 36 | 1 | 0.23333 | 0.03453 | 0.174581 | 0.3119 |
| 26 | 35 | 1 | 0.22667 | 0.03418 | 0.168661 | 0.3046 |
| 27 | 34 | 2 | 0.21333 | 0.03345 | 0.156891 | 0.2901 |
| 28 | 32 | 2 | 0.2 | 0.03266 | 0.145221 | 0.2754 |
| 29 | 30 | 1 | 0.19333 | 0.03224 | 0.139425 | 0.2681 |
| 30 | 29 | 2 | 0.18 | 0.03137 | 0.127918 | 0.2533 |
| 31 | 27 | 2 | 0.16667 | 0.03043 | 0.116531 | 0.2384 |
| 32 | 25 | 1 | 0.16 | 0.02993 | 0.110885 | 0.2309 |
| 33 | 24 | 1 | 0.15333 | 0.02942 | 0.105274 | 0.2233 |
| 34 | 23 | 1 | 0.14667 | 0.02889 | 0.099699 | 0.2158 |
| 41 | 22 | 1 | 0.14 | 0.02833 | 0.094161 | 0.2082 |
| 42 | 21 | 2 | 0.12667 | 0.02716 | 0.083209 | 0.1928 |
| 43 | 19 | 1 | 0.12 | 0.02653 | 0.077799 | 0.1851 |
| 44 | 18 | 1 | 0.11333 | 0.02588 | 0.072437 | 0.1773 |
| 45 | 17 | 1 | 0.10667 | 0.0252 | 0.067127 | 0.1695 |
| 46 | 16 | 1 | 0.1 | 0.02449 | 0.061873 | 0.1616 |
| 47 | 15 | 1 | 0.09333 | 0.02375 | 0.056679 | 0.1537 |
| 48 | 14 | 1 | 0.08667 | 0.02297 | 0.051551 | 0.1457 |
| 64 | 13 | 1 | 0.08 | 0.02215 | 0.046495 | 0.1377 |
| 65 | 12 | 1 | 0.07333 | 0.02128 | 0.041519 | 0.1295 |
| 66 | 11 | 1 | 0.06667 | 0.02037 | 0.036632 | 0.1213 |
| 75 | 10 | 1 | 0.06 | 0.01939 | 0.031846 | 0.113 |
| 76 | 9 | 1 | 0.05333 | 0.01835 | 0.027176 | 0.1047 |
| 77 | 8 | 1 | 0.04667 | 0.01722 | 0.02264 | 0.0962 |
| 78 | 7 | 1 | 0.04 | 0.016 | 0.018263 | 0.0876 |
| 79 | 6 | 1 | 0.03333 | 0.01466 | 0.01408 | 0.0789 |
| 80 | 5 | 1 | 0.02667 | 0.01315 | 0.010141 | 0.0701 |
| 81 | 4 | 1 | 0.02 | 0.01143 | 0.006524 | 0.0613 |
| 82 | 3 | 1 | 0.01333 | 0.00937 | 0.003366 | 0.0528 |
| 83 | 2 | 1 | 0.00667 | 0.00664 | 0.000945 | 0.047 |
| 84 | 1 | 1 | 0 | NaN | NA | NA |

**Table S16.** Akhisar station Kaplan-Meier survival estimates according to SPEI-12

| Kaplan-Meier Wet to Dry (SPEI12) | | | | | | |
| --- | --- | --- | --- | --- | --- | --- |
|  |  | n | events | median | 0.95LCL | 0.95UCL |
|  |  | 148 | 148 | 16 | 13 | 20 |
| time | n.risk | n.event | survival | std.err | lower 95% CI | upper 95% CI |
| 1 | 148 | 8 | 0.94595 | 0.01859 | 0.910208 | 0.9831 |
| 2 | 140 | 5 | 0.91216 | 0.02327 | 0.86768 | 0.9589 |
| 3 | 135 | 4 | 0.88514 | 0.02621 | 0.835227 | 0.938 |
| 4 | 131 | 3 | 0.86486 | 0.0281 | 0.811504 | 0.9217 |
| 5 | 128 | 5 | 0.83108 | 0.0308 | 0.772857 | 0.8937 |
| 6 | 123 | 4 | 0.80405 | 0.03263 | 0.742583 | 0.8706 |
| 7 | 119 | 4 | 0.77703 | 0.03421 | 0.71278 | 0.8471 |
| 8 | 115 | 4 | 0.75 | 0.03559 | 0.683384 | 0.8231 |
| 9 | 111 | 5 | 0.71622 | 0.03706 | 0.647145 | 0.7927 |
| 10 | 106 | 5 | 0.68243 | 0.03827 | 0.611406 | 0.7617 |
| 11 | 101 | 6 | 0.64189 | 0.03941 | 0.569116 | 0.724 |
| 12 | 95 | 6 | 0.60135 | 0.04025 | 0.527424 | 0.6856 |
| 13 | 89 | 4 | 0.57432 | 0.04064 | 0.499943 | 0.6598 |
| 14 | 85 | 4 | 0.5473 | 0.04092 | 0.472703 | 0.6337 |
| 15 | 81 | 4 | 0.52027 | 0.04107 | 0.445699 | 0.6073 |
| 16 | 77 | 4 | 0.49324 | 0.0411 | 0.418929 | 0.5807 |
| 17 | 73 | 4 | 0.46622 | 0.04101 | 0.392392 | 0.5539 |
| 18 | 69 | 4 | 0.43919 | 0.04079 | 0.366089 | 0.5269 |
| 19 | 65 | 2 | 0.42568 | 0.04064 | 0.353026 | 0.5133 |
| 20 | 63 | 2 | 0.41216 | 0.04046 | 0.340023 | 0.4996 |
| 21 | 61 | 1 | 0.40541 | 0.04036 | 0.333544 | 0.4927 |
| 22 | 60 | 1 | 0.39865 | 0.04025 | 0.327081 | 0.4859 |
| 23 | 59 | 1 | 0.39189 | 0.04013 | 0.320633 | 0.479 |
| 24 | 58 | 2 | 0.37838 | 0.03987 | 0.307783 | 0.4652 |
| 25 | 56 | 1 | 0.37162 | 0.03972 | 0.301382 | 0.4582 |
| 26 | 55 | 1 | 0.36486 | 0.03957 | 0.294997 | 0.4513 |
| 27 | 54 | 1 | 0.35811 | 0.03941 | 0.288628 | 0.4443 |
| 28 | 53 | 1 | 0.35135 | 0.03924 | 0.282276 | 0.4373 |
| 29 | 52 | 1 | 0.34459 | 0.03906 | 0.27594 | 0.4303 |
| 30 | 51 | 1 | 0.33784 | 0.03888 | 0.26962 | 0.4233 |
| 31 | 50 | 1 | 0.33108 | 0.03868 | 0.263318 | 0.4163 |
| 32 | 49 | 1 | 0.32432 | 0.03848 | 0.257033 | 0.4092 |
| 33 | 48 | 1 | 0.31757 | 0.03827 | 0.250766 | 0.4022 |
| 34 | 47 | 1 | 0.31081 | 0.03804 | 0.244516 | 0.3951 |
| 35 | 46 | 1 | 0.30405 | 0.03781 | 0.238284 | 0.388 |
| 36 | 45 | 1 | 0.2973 | 0.03757 | 0.232071 | 0.3809 |
| 37 | 44 | 1 | 0.29054 | 0.03732 | 0.225876 | 0.3737 |
| 38 | 43 | 2 | 0.27703 | 0.03679 | 0.213545 | 0.3594 |
| 39 | 41 | 1 | 0.27027 | 0.0365 | 0.207409 | 0.3522 |
| 40 | 40 | 1 | 0.26351 | 0.03621 | 0.201294 | 0.345 |
| 41 | 39 | 1 | 0.25676 | 0.03591 | 0.195199 | 0.3377 |
| 42 | 38 | 1 | 0.25 | 0.03559 | 0.189126 | 0.3305 |
| 43 | 37 | 1 | 0.24324 | 0.03527 | 0.183075 | 0.3232 |
| 44 | 36 | 1 | 0.23649 | 0.03493 | 0.177046 | 0.3159 |
| 45 | 35 | 1 | 0.22973 | 0.03458 | 0.17104 | 0.3086 |
| 46 | 34 | 2 | 0.21622 | 0.03384 | 0.159101 | 0.2938 |
| 47 | 32 | 1 | 0.20946 | 0.03345 | 0.153169 | 0.2864 |
| 48 | 31 | 1 | 0.2027 | 0.03305 | 0.147263 | 0.279 |
| 60 | 30 | 1 | 0.19595 | 0.03263 | 0.141384 | 0.2716 |
| 64 | 29 | 1 | 0.18919 | 0.03219 | 0.135534 | 0.2641 |
| 65 | 28 | 1 | 0.18243 | 0.03175 | 0.129713 | 0.2566 |
| 74 | 27 | 1 | 0.17568 | 0.03128 | 0.123922 | 0.249 |
| 75 | 26 | 1 | 0.16892 | 0.0308 | 0.118163 | 0.2415 |
| 76 | 25 | 1 | 0.16216 | 0.0303 | 0.112437 | 0.2339 |
| 77 | 24 | 1 | 0.15541 | 0.02978 | 0.106746 | 0.2262 |
| 78 | 23 | 1 | 0.14865 | 0.02924 | 0.101092 | 0.2186 |
| 79 | 22 | 1 | 0.14189 | 0.02868 | 0.095476 | 0.2109 |
| 80 | 21 | 1 | 0.13514 | 0.0281 | 0.0899 | 0.2031 |
| 81 | 20 | 1 | 0.12838 | 0.0275 | 0.084368 | 0.1953 |
| 82 | 19 | 1 | 0.12162 | 0.02687 | 0.078882 | 0.1875 |
| 83 | 18 | 1 | 0.11486 | 0.02621 | 0.073444 | 0.1796 |
| 84 | 17 | 1 | 0.10811 | 0.02552 | 0.06806 | 0.1717 |
| 85 | 16 | 2 | 0.09459 | 0.02406 | 0.057465 | 0.1557 |
| 86 | 14 | 2 | 0.08108 | 0.02244 | 0.047138 | 0.1395 |
| 87 | 12 | 1 | 0.07432 | 0.02156 | 0.042093 | 0.1312 |
| 88 | 11 | 1 | 0.06757 | 0.02063 | 0.037138 | 0.1229 |
| 89 | 10 | 1 | 0.06081 | 0.01964 | 0.032286 | 0.1145 |
| 90 | 9 | 1 | 0.05405 | 0.01859 | 0.027551 | 0.1061 |
| 91 | 8 | 1 | 0.0473 | 0.01745 | 0.022952 | 0.0975 |
| 92 | 7 | 1 | 0.04054 | 0.01621 | 0.018514 | 0.0888 |
| 93 | 6 | 1 | 0.03378 | 0.01485 | 0.014273 | 0.08 |
| 94 | 5 | 1 | 0.02703 | 0.01333 | 0.01028 | 0.0711 |
| 95 | 4 | 1 | 0.02027 | 0.01158 | 0.006613 | 0.0621 |
| 96 | 3 | 2 | 0.00676 | 0.00673 | 0.000958 | 0.0476 |
| 97 | 1 | 1 | 0 | NaN | NA | NA |

**Table S17.** Akhisar station Kaplan-Meier drought risk estimates according to SPEI-3, 6, and 12

| Drought Risk (SPEI3) | | Drought Risk (SPEI6) | | Drought Risk (SPEI12) | |
| --- | --- | --- | --- | --- | --- |
| Time | Drought Risk | Time | Drought Risk | Time | Drought Risk |
| 0 | 0.00662 | 0 | 0.00667 | 1 | 0.05405 |
| 1 | 0.06623 | 1 | 0.06667 | 2 | 0.08784 |
| 2 | 0.09934 | 2 | 0.14667 | 3 | 0.11486 |
| 3 | 0.1457 | 3 | 0.19333 | 4 | 0.13514 |
| 4 | 0.23841 | 4 | 0.22667 | 5 | 0.16892 |
| 5 | 0.30464 | 5 | 0.24 | 6 | 0.19595 |
| 6 | 0.39073 | 6 | 0.26 | 7 | 0.22297 |
| 7 | 0.45695 | 7 | 0.29333 | 8 | 0.25 |
| 8 | 0.5298 | 8 | 0.32667 | 9 | 0.28378 |
| 9 | 0.55629 | 9 | 0.36667 | 10 | 0.31757 |
| 10 | 0.60265 | 10 | 0.40667 | 11 | 0.35811 |
| 11 | 0.62914 | 11 | 0.44 | 12 | 0.39865 |
| 12 | 0.64901 | 12 | 0.48 | 13 | 0.42568 |
| 13 | 0.68212 | 13 | 0.51333 | 14 | 0.4527 |
| 14 | 0.71523 | 14 | 0.55333 | 15 | 0.47973 |
| 15 | 0.74172 | 15 | 0.58 | 16 | 0.50676 |
| 16 | 0.78146 | 16 | 0.60667 | 17 | 0.53378 |
| 17 | 0.80795 | 17 | 0.64 | 18 | 0.56081 |
| 18 | 0.84106 | 18 | 0.67333 | 19 | 0.57432 |
| 19 | 0.86093 | 19 | 0.69333 | 20 | 0.58784 |
| 20 | 0.87417 | 20 | 0.7 | 21 | 0.59459 |
| 21 | 0.88079 | 21 | 0.71333 | 22 | 0.60135 |
| 22 | 0.89404 | 22 | 0.73333 | 23 | 0.60811 |
| 23 | 0.90066 | 23 | 0.74 | 24 | 0.62162 |
| 24 | 0.90728 | 24 | 0.76 | 25 | 0.62838 |
| 25 | 0.91391 | 25 | 0.76667 | 26 | 0.63514 |
| 26 | 0.92715 | 26 | 0.77333 | 27 | 0.64189 |
| 27 | 0.93377 | 27 | 0.78667 | 28 | 0.64865 |
| 28 | 0.9404 | 28 | 0.8 | 29 | 0.65541 |
| 29 | 0.94702 | 29 | 0.80667 | 30 | 0.66216 |
| 32 | 0.95364 | 30 | 0.82 | 31 | 0.66892 |
| 40 | 0.96026 | 31 | 0.83333 | 32 | 0.67568 |
| 41 | 0.96689 | 32 | 0.84 | 33 | 0.68243 |
| 42 | 0.97351 | 33 | 0.84667 | 34 | 0.68919 |
| 49 | 0.98013 | 34 | 0.85333 | 35 | 0.69595 |
| 50 | 0.98675 | 41 | 0.86 | 36 | 0.7027 |
| 51 | 0.99338 | 42 | 0.87333 | 37 | 0.70946 |
| 52 | 1 | 43 | 0.88 | 38 | 0.72297 |
|  |  | 44 | 0.88667 | 39 | 0.72973 |
|  |  | 45 | 0.89333 | 40 | 0.73649 |
|  |  | 46 | 0.9 | 41 | 0.74324 |
|  |  | 47 | 0.90667 | 42 | 0.75 |
|  |  | 48 | 0.91333 | 43 | 0.75676 |
|  |  | 64 | 0.92 | 44 | 0.76351 |
|  |  | 65 | 0.92667 | 45 | 0.77027 |
|  |  | 66 | 0.93333 | 46 | 0.78378 |
|  |  | 75 | 0.94 | 47 | 0.79054 |
|  |  | 76 | 0.94667 | 48 | 0.7973 |
|  |  | 77 | 0.95333 | 60 | 0.80405 |
|  |  | 78 | 0.96 | 64 | 0.81081 |
|  |  | 79 | 0.96667 | 65 | 0.81757 |
|  |  | 80 | 0.97333 | 74 | 0.82432 |
|  |  | 81 | 0.98 | 75 | 0.83108 |
|  |  | 82 | 0.98667 | 76 | 0.83784 |
|  |  | 83 | 0.99333 | 77 | 0.84459 |
|  |  | 84 | 1 | 78 | 0.85135 |
|  |  |  |  | 79 | 0.85811 |
|  |  |  |  | 80 | 0.86486 |
|  |  |  |  | 81 | 0.87162 |
|  |  |  |  | 82 | 0.87838 |
|  |  |  |  | 83 | 0.88514 |
|  |  |  |  | 84 | 0.89189 |
|  |  |  |  | 85 | 0.90541 |
|  |  |  |  | 86 | 0.91892 |
|  |  |  |  | 87 | 0.92568 |
|  |  |  |  | 88 | 0.93243 |
|  |  |  |  | 89 | 0.93919 |
|  |  |  |  | 90 | 0.94595 |
|  |  |  |  | 91 | 0.9527 |
|  |  |  |  | 92 | 0.95946 |
|  |  |  |  | 93 | 0.96622 |
|  |  |  |  | 94 | 0.97297 |
|  |  |  |  | 95 | 0.97973 |
|  |  |  |  | 96 | 0.99324 |
|  |  |  |  | 97 | 1 |

**Table S18.** Alasehir station Kaplan-Meier survival estimates according to SPI-3

| Kaplan-Meier Wet to Dry (SPI3) | | | | | | |
| --- | --- | --- | --- | --- | --- | --- |
|  |  | n | events | median | 0.95LCL | 0.95UCL |
|  |  | 162 | 162 | 9 | 8 | 11 |
| time | n.risk | n.event | survival | std.err | lower 95% CL | upper 95% CL |
| 1 | 162 | 11 | 0.9321 | 0.01977 | 0.894153 | 0.9717 |
| 2 | 151 | 3 | 0.91358 | 0.02208 | 0.871321 | 0.9579 |
| 3 | 148 | 9 | 0.85802 | 0.02742 | 0.805927 | 0.9135 |
| 4 | 139 | 9 | 0.80247 | 0.03128 | 0.743444 | 0.8662 |
| 5 | 130 | 13 | 0.72222 | 0.03519 | 0.656441 | 0.7946 |
| 6 | 117 | 11 | 0.65432 | 0.03737 | 0.585035 | 0.7318 |
| 7 | 106 | 13 | 0.57407 | 0.03885 | 0.502763 | 0.6555 |
| 8 | 93 | 10 | 0.51235 | 0.03927 | 0.440877 | 0.5954 |
| 9 | 83 | 6 | 0.47531 | 0.03924 | 0.404306 | 0.5588 |
| 10 | 77 | 5 | 0.44444 | 0.03904 | 0.374151 | 0.5279 |
| 11 | 72 | 6 | 0.40741 | 0.0386 | 0.338355 | 0.4906 |
| 12 | 66 | 5 | 0.37654 | 0.03807 | 0.308859 | 0.4591 |
| 13 | 61 | 3 | 0.35802 | 0.03767 | 0.291313 | 0.44 |
| 14 | 58 | 1 | 0.35185 | 0.03752 | 0.285491 | 0.4336 |
| 15 | 57 | 4 | 0.32716 | 0.03686 | 0.262334 | 0.408 |
| 16 | 53 | 4 | 0.30247 | 0.03609 | 0.239399 | 0.3822 |
| 17 | 49 | 3 | 0.28395 | 0.03543 | 0.222353 | 0.3626 |
| 18 | 46 | 6 | 0.24691 | 0.03388 | 0.18869 | 0.3231 |
| 19 | 40 | 4 | 0.22222 | 0.03266 | 0.166599 | 0.2964 |
| 20 | 36 | 4 | 0.19753 | 0.03128 | 0.144824 | 0.2694 |
| 21 | 32 | 4 | 0.17284 | 0.02971 | 0.123408 | 0.2421 |
| 22 | 28 | 3 | 0.15432 | 0.02838 | 0.107614 | 0.2213 |
| 23 | 25 | 2 | 0.14198 | 0.02742 | 0.097231 | 0.2073 |
| 24 | 23 | 4 | 0.11728 | 0.02528 | 0.076872 | 0.1789 |
| 25 | 19 | 3 | 0.09877 | 0.02344 | 0.062028 | 0.1573 |
| 26 | 16 | 2 | 0.08642 | 0.02208 | 0.052381 | 0.1426 |
| 27 | 14 | 2 | 0.07407 | 0.02058 | 0.042976 | 0.1277 |
| 28 | 12 | 2 | 0.06173 | 0.01891 | 0.033865 | 0.1125 |
| 34 | 10 | 1 | 0.05556 | 0.018 | 0.029443 | 0.1048 |
| 35 | 9 | 1 | 0.04938 | 0.01702 | 0.025128 | 0.097 |
| 36 | 8 | 2 | 0.03704 | 0.01484 | 0.01689 | 0.0812 |
| 37 | 6 | 3 | 0.01852 | 0.01059 | 0.006036 | 0.0568 |
| 38 | 3 | 2 | 0.00617 | 0.00615 | 0.000875 | 0.0436 |
| 39 | 1 | 1 | 0 | NaN | NA | NA |

**Table S19.** Alasehir station Kaplan-Meier survival estimates according to SPI-6

| Kaplan-Meier Wet to Dry (SPI6) | | | | | | |
| --- | --- | --- | --- | --- | --- | --- |
|  |  | n | events | median | 0.95LCL | 0.95UCL |
|  |  | 143 | 143 | 13 | 10 | 16 |
| time | n.risk | n.event | survival | std.err | lower 95% CL | upper 95% CL |
| 1 | 143 | 7 | 0.95105 | 0.01804 | 0.916334 | 0.9871 |
| 2 | 136 | 7 | 0.9021 | 0.02485 | 0.854681 | 0.9521 |
| 3 | 129 | 4 | 0.87413 | 0.02774 | 0.821415 | 0.9302 |
| 4 | 125 | 5 | 0.83916 | 0.03072 | 0.781056 | 0.9016 |
| 5 | 120 | 4 | 0.81119 | 0.03273 | 0.749515 | 0.8779 |
| 6 | 116 | 5 | 0.77622 | 0.03485 | 0.710834 | 0.8476 |
| 7 | 111 | 9 | 0.71329 | 0.03782 | 0.642888 | 0.7914 |
| 8 | 102 | 6 | 0.67133 | 0.03928 | 0.59859 | 0.7529 |
| 9 | 96 | 7 | 0.62238 | 0.04054 | 0.547783 | 0.7071 |
| 10 | 89 | 8 | 0.56643 | 0.04144 | 0.490765 | 0.6538 |
| 11 | 81 | 5 | 0.53147 | 0.04173 | 0.455663 | 0.6199 |
| 12 | 76 | 4 | 0.5035 | 0.04181 | 0.42787 | 0.5925 |
| 13 | 72 | 3 | 0.48252 | 0.04179 | 0.407191 | 0.5718 |
| 14 | 69 | 3 | 0.46154 | 0.04169 | 0.386655 | 0.5509 |
| 15 | 66 | 6 | 0.41958 | 0.04127 | 0.346015 | 0.5088 |
| 16 | 60 | 5 | 0.38462 | 0.04068 | 0.3126 | 0.4732 |
| 17 | 55 | 2 | 0.37063 | 0.04039 | 0.299352 | 0.4589 |
| 18 | 53 | 2 | 0.35664 | 0.04006 | 0.286174 | 0.4445 |
| 19 | 51 | 2 | 0.34266 | 0.03969 | 0.273068 | 0.43 |
| 20 | 49 | 2 | 0.32867 | 0.03928 | 0.260035 | 0.4154 |
| 21 | 47 | 2 | 0.31469 | 0.03883 | 0.247077 | 0.4008 |
| 22 | 45 | 3 | 0.29371 | 0.03809 | 0.227788 | 0.3787 |
| 23 | 42 | 3 | 0.27273 | 0.03724 | 0.208685 | 0.3564 |
| 24 | 39 | 4 | 0.24476 | 0.03595 | 0.183524 | 0.3264 |
| 25 | 35 | 5 | 0.20979 | 0.03405 | 0.152629 | 0.2884 |
| 26 | 30 | 2 | 0.1958 | 0.03318 | 0.140464 | 0.2729 |
| 27 | 28 | 2 | 0.18182 | 0.03225 | 0.128422 | 0.2574 |
| 28 | 26 | 2 | 0.16783 | 0.03125 | 0.116513 | 0.2418 |
| 29 | 24 | 3 | 0.14685 | 0.0296 | 0.098927 | 0.218 |
| 30 | 21 | 1 | 0.13986 | 0.029 | 0.093147 | 0.21 |
| 31 | 20 | 1 | 0.13287 | 0.02838 | 0.087413 | 0.202 |
| 33 | 19 | 2 | 0.11888 | 0.02706 | 0.07609 | 0.1857 |
| 34 | 17 | 2 | 0.1049 | 0.02562 | 0.064986 | 0.1693 |
| 35 | 15 | 2 | 0.09091 | 0.02404 | 0.054139 | 0.1527 |
| 36 | 13 | 3 | 0.06993 | 0.02133 | 0.038466 | 0.1271 |
| 37 | 10 | 3 | 0.04895 | 0.01804 | 0.023769 | 0.1008 |
| 38 | 7 | 2 | 0.03497 | 0.01536 | 0.01478 | 0.0827 |
| 39 | 5 | 1 | 0.02797 | 0.01379 | 0.010644 | 0.0735 |
| 40 | 4 | 1 | 0.02098 | 0.01198 | 0.006847 | 0.0643 |
| 49 | 3 | 1 | 0.01399 | 0.00982 | 0.003532 | 0.0554 |
| 50 | 2 | 1 | 0.00699 | 0.00697 | 0.000992 | 0.0493 |
| 70 | 1 | 1 | 0 | NaN | NA | NA |

**Table S20.** Alasehir station Kaplan-Meier survival estimates according to SPI-12

| Kaplan-Meier Wet to Dry (SPI12) | | | | | | |
| --- | --- | --- | --- | --- | --- | --- |
|  |  | n | events | median | 0.95LCL | 0.95UCL |
|  |  | 134 | 134 | 29 | 25 | 34 |
| time | n.risk | n.event | survival | std.err | lower 95% CL | upper 95% CL |
| 1 | 134 | 3 | 0.97761 | 0.01278 | 0.95288 | 1 |
| 2 | 131 | 3 | 0.95522 | 0.01787 | 0.92084 | 0.9909 |
| 3 | 128 | 3 | 0.93284 | 0.02162 | 0.8914 | 0.9762 |
| 4 | 125 | 2 | 0.91791 | 0.02371 | 0.87259 | 0.9656 |
| 5 | 123 | 3 | 0.89552 | 0.02642 | 0.8452 | 0.9488 |
| 6 | 120 | 1 | 0.88806 | 0.02724 | 0.83625 | 0.9431 |
| 7 | 119 | 1 | 0.8806 | 0.02801 | 0.82737 | 0.9372 |
| 8 | 118 | 3 | 0.85821 | 0.03013 | 0.80113 | 0.9194 |
| 9 | 115 | 3 | 0.83582 | 0.032 | 0.7754 | 0.901 |
| 10 | 112 | 2 | 0.8209 | 0.03312 | 0.75847 | 0.8885 |
| 11 | 110 | 1 | 0.81343 | 0.03365 | 0.75008 | 0.8821 |
| 12 | 109 | 3 | 0.79104 | 0.03512 | 0.72512 | 0.863 |
| 13 | 106 | 4 | 0.76119 | 0.03683 | 0.69232 | 0.8369 |
| 14 | 102 | 3 | 0.73881 | 0.03795 | 0.66805 | 0.8171 |
| 15 | 99 | 3 | 0.71642 | 0.03894 | 0.64403 | 0.7969 |
| 16 | 96 | 3 | 0.69403 | 0.03981 | 0.62023 | 0.7766 |
| 17 | 93 | 3 | 0.67164 | 0.04057 | 0.59665 | 0.7561 |
| 18 | 90 | 2 | 0.65672 | 0.04102 | 0.58105 | 0.7422 |
| 19 | 88 | 2 | 0.64179 | 0.04142 | 0.56553 | 0.7283 |
| 20 | 86 | 2 | 0.62687 | 0.04178 | 0.5501 | 0.7143 |
| 21 | 84 | 1 | 0.6194 | 0.04194 | 0.54242 | 0.7073 |
| 22 | 83 | 1 | 0.61194 | 0.0421 | 0.53475 | 0.7003 |
| 23 | 82 | 1 | 0.60448 | 0.04224 | 0.52711 | 0.6932 |
| 24 | 81 | 3 | 0.58209 | 0.04261 | 0.50429 | 0.6719 |
| 25 | 78 | 3 | 0.5597 | 0.04288 | 0.48166 | 0.6504 |
| 26 | 75 | 2 | 0.54478 | 0.04302 | 0.46666 | 0.636 |
| 27 | 73 | 2 | 0.52985 | 0.04312 | 0.45174 | 0.6215 |
| 28 | 71 | 2 | 0.51493 | 0.04317 | 0.43689 | 0.6069 |
| 29 | 69 | 3 | 0.49254 | 0.04319 | 0.41476 | 0.5849 |
| 30 | 66 | 3 | 0.47015 | 0.04312 | 0.3928 | 0.5627 |
| 31 | 63 | 3 | 0.44776 | 0.04296 | 0.37101 | 0.5404 |
| 32 | 60 | 2 | 0.43284 | 0.0428 | 0.35657 | 0.5254 |
| 33 | 58 | 3 | 0.41045 | 0.04249 | 0.33507 | 0.5028 |
| 34 | 55 | 2 | 0.39552 | 0.04224 | 0.32082 | 0.4876 |
| 35 | 53 | 1 | 0.38806 | 0.0421 | 0.31373 | 0.48 |
| 36 | 52 | 1 | 0.3806 | 0.04194 | 0.30666 | 0.4724 |
| 37 | 51 | 1 | 0.37313 | 0.04178 | 0.29961 | 0.4647 |
| 38 | 50 | 1 | 0.36567 | 0.04161 | 0.29258 | 0.457 |
| 39 | 49 | 1 | 0.35821 | 0.04142 | 0.28557 | 0.4493 |
| 40 | 48 | 1 | 0.35075 | 0.04122 | 0.27858 | 0.4416 |
| 41 | 47 | 1 | 0.34328 | 0.04102 | 0.27161 | 0.4339 |
| 42 | 46 | 1 | 0.33582 | 0.0408 | 0.26466 | 0.4261 |
| 43 | 45 | 1 | 0.32836 | 0.04057 | 0.25774 | 0.4183 |
| 44 | 44 | 1 | 0.3209 | 0.04033 | 0.25084 | 0.4105 |
| 45 | 43 | 1 | 0.31343 | 0.04007 | 0.24396 | 0.4027 |
| 46 | 42 | 2 | 0.29851 | 0.03953 | 0.23027 | 0.387 |
| 47 | 40 | 1 | 0.29104 | 0.03924 | 0.22346 | 0.3791 |
| 48 | 39 | 1 | 0.28358 | 0.03894 | 0.21667 | 0.3712 |
| 49 | 38 | 2 | 0.26866 | 0.03829 | 0.20318 | 0.3552 |
| 50 | 36 | 1 | 0.26119 | 0.03795 | 0.19647 | 0.3472 |
| 51 | 35 | 1 | 0.25373 | 0.03759 | 0.18979 | 0.3392 |
| 52 | 34 | 1 | 0.24627 | 0.03722 | 0.18313 | 0.3312 |
| 53 | 33 | 1 | 0.23881 | 0.03683 | 0.17651 | 0.3231 |
| 54 | 32 | 1 | 0.23134 | 0.03643 | 0.16991 | 0.315 |
| 55 | 31 | 1 | 0.22388 | 0.03601 | 0.16335 | 0.3069 |
| 56 | 30 | 1 | 0.21642 | 0.03557 | 0.15681 | 0.2987 |
| 57 | 29 | 1 | 0.20896 | 0.03512 | 0.15031 | 0.2905 |
| 58 | 28 | 1 | 0.20149 | 0.03465 | 0.14384 | 0.2823 |
| 82 | 27 | 1 | 0.19403 | 0.03416 | 0.1374 | 0.274 |
| 83 | 26 | 1 | 0.18657 | 0.03365 | 0.13101 | 0.2657 |
| 84 | 25 | 1 | 0.1791 | 0.03312 | 0.12465 | 0.2574 |
| 85 | 24 | 1 | 0.17164 | 0.03257 | 0.11833 | 0.249 |
| 86 | 23 | 1 | 0.16418 | 0.032 | 0.11205 | 0.2406 |
| 87 | 22 | 1 | 0.15672 | 0.0314 | 0.10581 | 0.2321 |
| 88 | 21 | 1 | 0.14925 | 0.03078 | 0.09963 | 0.2236 |
| 89 | 20 | 1 | 0.14179 | 0.03013 | 0.09349 | 0.2151 |
| 90 | 19 | 1 | 0.13433 | 0.02946 | 0.0874 | 0.2065 |
| 97 | 18 | 1 | 0.12687 | 0.02875 | 0.08136 | 0.1978 |
| 98 | 17 | 1 | 0.1194 | 0.02801 | 0.07539 | 0.1891 |
| 99 | 16 | 1 | 0.11194 | 0.02724 | 0.06948 | 0.1803 |
| 100 | 15 | 2 | 0.09701 | 0.02557 | 0.05788 | 0.1626 |
| 101 | 13 | 2 | 0.08209 | 0.02371 | 0.0466 | 0.1446 |
| 102 | 11 | 2 | 0.06716 | 0.02162 | 0.03574 | 0.1262 |
| 103 | 9 | 1 | 0.0597 | 0.02047 | 0.03049 | 0.1169 |
| 104 | 8 | 1 | 0.05224 | 0.01922 | 0.0254 | 0.1074 |
| 105 | 7 | 1 | 0.04478 | 0.01787 | 0.02048 | 0.0979 |
| 107 | 6 | 1 | 0.03731 | 0.01637 | 0.01579 | 0.0882 |
| 108 | 5 | 1 | 0.02985 | 0.0147 | 0.01137 | 0.0784 |
| 152 | 4 | 1 | 0.02239 | 0.01278 | 0.00731 | 0.0685 |
| 153 | 3 | 1 | 0.01493 | 0.01047 | 0.00377 | 0.0591 |
| 154 | 2 | 1 | 0.00746 | 0.00743 | 0.00106 | 0.0526 |
| 155 | 1 | 1 | 0 | NaN | NA | NA |

**Table S21.** Alasehir station Kaplan-Meier drought risk estimates according to SPI-3, 6, and 12

| Drought Risk (SPI3) | | Drought Risk (SPI6) | | Drought Risk (SPI12) | |
| --- | --- | --- | --- | --- | --- |
| Time | Drought Risk | Time | Drought Risk | Time | Drought Risk |
| 1 | 0.0679 | 1 | 0.04895 | 1 | 0.02239 |
| 2 | 0.08642 | 2 | 0.0979 | 2 | 0.04478 |
| 3 | 0.14198 | 3 | 0.12587 | 3 | 0.06716 |
| 4 | 0.19753 | 4 | 0.16084 | 4 | 0.08209 |
| 5 | 0.27778 | 5 | 0.18881 | 5 | 0.10448 |
| 6 | 0.34568 | 6 | 0.22378 | 6 | 0.11194 |
| 7 | 0.42593 | 7 | 0.28671 | 7 | 0.1194 |
| 8 | 0.48765 | 8 | 0.32867 | 8 | 0.14179 |
| 9 | 0.52469 | 9 | 0.37762 | 9 | 0.16418 |
| 10 | 0.55556 | 10 | 0.43357 | 10 | 0.1791 |
| 11 | 0.59259 | 11 | 0.46853 | 11 | 0.18657 |
| 12 | 0.62346 | 12 | 0.4965 | 12 | 0.20896 |
| 13 | 0.64198 | 13 | 0.51748 | 13 | 0.23881 |
| 14 | 0.64815 | 14 | 0.53846 | 14 | 0.26119 |
| 15 | 0.67284 | 15 | 0.58042 | 15 | 0.28358 |
| 16 | 0.69753 | 16 | 0.61538 | 16 | 0.30597 |
| 17 | 0.71605 | 17 | 0.62937 | 17 | 0.32836 |
| 18 | 0.75309 | 18 | 0.64336 | 18 | 0.34328 |
| 19 | 0.77778 | 19 | 0.65734 | 19 | 0.35821 |
| 20 | 0.80247 | 20 | 0.67133 | 20 | 0.37313 |
| 21 | 0.82716 | 21 | 0.68531 | 21 | 0.3806 |
| 22 | 0.84568 | 22 | 0.70629 | 22 | 0.38806 |
| 23 | 0.85802 | 23 | 0.72727 | 23 | 0.39552 |
| 24 | 0.88272 | 24 | 0.75524 | 24 | 0.41791 |
| 25 | 0.90123 | 25 | 0.79021 | 25 | 0.4403 |
| 26 | 0.91358 | 26 | 0.8042 | 26 | 0.45522 |
| 27 | 0.92593 | 27 | 0.81818 | 27 | 0.47015 |
| 28 | 0.93827 | 28 | 0.83217 | 28 | 0.48507 |
| 34 | 0.94444 | 29 | 0.85315 | 29 | 0.50746 |
| 35 | 0.95062 | 30 | 0.86014 | 30 | 0.52985 |
| 36 | 0.96296 | 31 | 0.86713 | 31 | 0.55224 |
| 37 | 0.98148 | 33 | 0.88112 | 32 | 0.56716 |
| 38 | 0.99383 | 34 | 0.8951 | 33 | 0.58955 |
| 39 | 1 | 35 | 0.90909 | 34 | 0.60448 |
|  |  | 36 | 0.93007 | 35 | 0.61194 |
|  |  | 37 | 0.95105 | 36 | 0.6194 |
|  |  | 38 | 0.96503 | 37 | 0.62687 |
|  |  | 39 | 0.97203 | 38 | 0.63433 |
|  |  | 40 | 0.97902 | 39 | 0.64179 |
|  |  | 49 | 0.98601 | 40 | 0.64925 |
|  |  | 50 | 0.99301 | 41 | 0.65672 |
|  |  | 70 | 1 | 42 | 0.66418 |
|  |  |  |  | 43 | 0.67164 |
|  |  |  |  | 44 | 0.6791 |
|  |  |  |  | 45 | 0.68657 |
|  |  |  |  | 46 | 0.70149 |
|  |  |  |  | 47 | 0.70896 |
|  |  |  |  | 48 | 0.71642 |
|  |  |  |  | 49 | 0.73134 |
|  |  |  |  | 50 | 0.73881 |
|  |  |  |  | 51 | 0.74627 |
|  |  |  |  | 52 | 0.75373 |
|  |  |  |  | 53 | 0.76119 |
|  |  |  |  | 54 | 0.76866 |
|  |  |  |  | 55 | 0.77612 |
|  |  |  |  | 56 | 0.78358 |
|  |  |  |  | 57 | 0.79104 |
|  |  |  |  | 58 | 0.79851 |
|  |  |  |  | 82 | 0.80597 |
|  |  |  |  | 83 | 0.81343 |
|  |  |  |  | 84 | 0.8209 |
|  |  |  |  | 85 | 0.82836 |
|  |  |  |  | 86 | 0.83582 |
|  |  |  |  | 87 | 0.84328 |
|  |  |  |  | 88 | 0.85075 |
|  |  |  |  | 89 | 0.85821 |
|  |  |  |  | 90 | 0.86567 |
|  |  |  |  | 97 | 0.87313 |
|  |  |  |  | 98 | 0.8806 |
|  |  |  |  | 99 | 0.88806 |
|  |  |  |  | 100 | 0.90299 |
|  |  |  |  | 101 | 0.91791 |
|  |  |  |  | 102 | 0.93284 |
|  |  |  |  | 103 | 0.9403 |
|  |  |  |  | 104 | 0.94776 |
|  |  |  |  | 105 | 0.95522 |
|  |  |  |  | 107 | 0.96269 |
|  |  |  |  | 108 | 0.97015 |
|  |  |  |  | 152 | 0.97761 |
|  |  |  |  | 153 | 0.98507 |
|  |  |  |  | 154 | 0.99254 |
|  |  |  |  | 155 | 1 |

**Table S22.** Alasehir station Kaplan-Meier survival estimates according to SPEI-3

| Kaplan-Meier Wet to Dry (SPEI3) | | | | | | |
| --- | --- | --- | --- | --- | --- | --- |
|  |  | n | events | median | 0.95LCL | 0.95UCL |
|  |  | 99 | 99 | 9 | 8 | 10 |
| time | n.risk | n.event | survival | std.err | lower 95% CI | upper 95% CI |
| 1 | 99 | 3 | 0.9697 | 0.0172 | 0.93651 | 10.000 |
| 2 | 96 | 1 | 0.9596 | 0.0198 | 0.92158 | 0.9992 |
| 3 | 95 | 6 | 0.899 | 0.0303 | 0.84155 | 0.9604 |
| 4 | 89 | 5 | 0.8485 | 0.036 | 0.78072 | 0.9221 |
| 5 | 84 | 7 | 0.7778 | 0.0418 | 0.70005 | 0.8641 |
| 6 | 77 | 8 | 0.697 | 0.0462 | 0.61207 | 0.7936 |
| 7 | 69 | 10 | 0.596 | 0.0493 | 0.50673 | 0.7009 |
| 8 | 59 | 8 | 0.5152 | 0.0502 | 0.42554 | 0.6236 |
| 9 | 51 | 7 | 0.4444 | 0.0499 | 0.35659 | 0.5539 |
| 10 | 44 | 6 | 0.3838 | 0.0489 | 0.29906 | 0.4926 |
| 11 | 38 | 4 | 0.3434 | 0.0477 | 0.26155 | 0.451 |
| 12 | 34 | 4 | 0.303 | 0.0462 | 0.22477 | 0.4085 |
| 13 | 30 | 2 | 0.2828 | 0.0453 | 0.20668 | 0.387 |
| 14 | 28 | 2 | 0.2626 | 0.0442 | 0.1888 | 0.3653 |
| 15 | 26 | 1 | 0.2525 | 0.0437 | 0.17994 | 0.3544 |
| 18 | 25 | 2 | 0.2323 | 0.0424 | 0.1624 | 0.3324 |
| 19 | 23 | 1 | 0.2222 | 0.0418 | 0.15372 | 0.3212 |
| 20 | 22 | 1 | 0.2121 | 0.0411 | 0.14511 | 0.3101 |
| 24 | 21 | 2 | 0.1919 | 0.0396 | 0.12811 | 0.2875 |
| 25 | 19 | 2 | 0.1717 | 0.0379 | 0.11141 | 0.2647 |
| 26 | 17 | 2 | 0.1515 | 0.036 | 0.09506 | 0.2415 |
| 27 | 15 | 2 | 0.1313 | 0.0339 | 0.07912 | 0.2179 |
| 28 | 13 | 2 | 0.1111 | 0.0316 | 0.06365 | 0.194 |
| 29 | 11 | 1 | 0.101 | 0.0303 | 0.05612 | 0.1818 |
| 30 | 10 | 2 | 0.0808 | 0.0274 | 0.04158 | 0.157 |
| 31 | 8 | 1 | 0.0707 | 0.0258 | 0.03462 | 0.1444 |
| 32 | 7 | 1 | 0.0606 | 0.024 | 0.02791 | 0.1316 |
| 33 | 6 | 1 | 0.0505 | 0.022 | 0.0215 | 0.1186 |
| 34 | 5 | 1 | 0.0404 | 0.0198 | 0.01547 | 0.1055 |
| 43 | 4 | 1 | 0.0303 | 0.0172 | 0.00994 | 0.0923 |
| 62 | 3 | 1 | 0.0202 | 0.0141 | 0.00512 | 0.0796 |
| 63 | 2 | 1 | 0.0101 | 0.01 | 0.00144 | 0.071 |
| 67 | 1 | 1 | 0 | NaN | NA | NA |

**Table S23.** Alasehir station Kaplan-Meier survival estimates according to SPEI-6

| Kaplan-Meier Wet to Dry (SPEI6) | | | | | | |
| --- | --- | --- | --- | --- | --- | --- |
|  |  | n | events | median | 0.95LCL | 0.95UCL |
|  |  | 89 | 89 | 15 | 10 | 23 |
| time | n.risk | n.event | survival | std.err | lower 95% CI | upper 95% CI |
| 1 | 89 | 3 | 0.9663 | 0.0191 | 0.92952 | 10.000 |
| 2 | 86 | 5 | 0.9101 | 0.0303 | 0.85259 | 0.9715 |
| 3 | 81 | 4 | 0.8652 | 0.0362 | 0.79704 | 0.9391 |
| 4 | 77 | 3 | 0.8315 | 0.0397 | 0.75721 | 0.913 |
| 5 | 74 | 2 | 0.809 | 0.0417 | 0.73131 | 0.8949 |
| 6 | 72 | 5 | 0.7528 | 0.0457 | 0.66832 | 0.848 |
| 7 | 67 | 3 | 0.7191 | 0.0476 | 0.63154 | 0.8188 |
| 8 | 64 | 4 | 0.6742 | 0.0497 | 0.58349 | 0.7789 |
| 9 | 60 | 3 | 0.6404 | 0.0509 | 0.54813 | 0.7483 |
| 10 | 57 | 6 | 0.573 | 0.0524 | 0.47896 | 0.6856 |
| 11 | 51 | 2 | 0.5506 | 0.0527 | 0.45634 | 0.6642 |
| 12 | 49 | 2 | 0.5281 | 0.0529 | 0.43393 | 0.6427 |
| 13 | 47 | 1 | 0.5169 | 0.053 | 0.4228 | 0.6318 |
| 14 | 46 | 1 | 0.5056 | 0.053 | 0.41172 | 0.6209 |
| 15 | 45 | 1 | 0.4944 | 0.053 | 0.4007 | 0.61 |
| 16 | 44 | 1 | 0.4831 | 0.053 | 0.38972 | 0.599 |
| 17 | 43 | 2 | 0.4607 | 0.0528 | 0.36793 | 0.5768 |
| 18 | 41 | 2 | 0.4382 | 0.0526 | 0.34635 | 0.5544 |
| 19 | 39 | 1 | 0.427 | 0.0524 | 0.33563 | 0.5432 |
| 20 | 38 | 1 | 0.4157 | 0.0522 | 0.32497 | 0.5318 |
| 21 | 37 | 2 | 0.3933 | 0.0518 | 0.30381 | 0.509 |
| 23 | 35 | 1 | 0.382 | 0.0515 | 0.29331 | 0.4976 |
| 24 | 34 | 1 | 0.3708 | 0.0512 | 0.28287 | 0.486 |
| 25 | 33 | 1 | 0.3596 | 0.0509 | 0.27248 | 0.4744 |
| 26 | 32 | 1 | 0.3483 | 0.0505 | 0.26215 | 0.4628 |
| 27 | 31 | 1 | 0.3371 | 0.0501 | 0.25188 | 0.4511 |
| 28 | 30 | 1 | 0.3258 | 0.0497 | 0.24167 | 0.4393 |
| 29 | 29 | 1 | 0.3146 | 0.0492 | 0.23152 | 0.4275 |
| 30 | 28 | 2 | 0.2921 | 0.0482 | 0.21141 | 0.4037 |
| 31 | 26 | 2 | 0.2697 | 0.047 | 0.19157 | 0.3796 |
| 32 | 24 | 1 | 0.2584 | 0.0464 | 0.18176 | 0.3674 |
| 33 | 23 | 1 | 0.2472 | 0.0457 | 0.17202 | 0.3552 |
| 34 | 22 | 1 | 0.236 | 0.045 | 0.16236 | 0.3429 |
| 35 | 21 | 1 | 0.2247 | 0.0442 | 0.15277 | 0.3305 |
| 36 | 20 | 1 | 0.2135 | 0.0434 | 0.14328 | 0.3181 |
| 37 | 19 | 1 | 0.2022 | 0.0426 | 0.13387 | 0.3055 |
| 38 | 18 | 1 | 0.191 | 0.0417 | 0.12456 | 0.2929 |
| 39 | 17 | 1 | 0.1798 | 0.0407 | 0.11535 | 0.2802 |
| 40 | 16 | 1 | 0.1685 | 0.0397 | 0.10624 | 0.2674 |
| 41 | 15 | 1 | 0.1573 | 0.0386 | 0.09725 | 0.2544 |
| 42 | 14 | 1 | 0.1461 | 0.0374 | 0.08839 | 0.2414 |
| 43 | 13 | 1 | 0.1348 | 0.0362 | 0.07966 | 0.2282 |
| 46 | 12 | 1 | 0.1236 | 0.0349 | 0.07108 | 0.2149 |
| 47 | 11 | 1 | 0.1124 | 0.0335 | 0.06266 | 0.2015 |
| 48 | 10 | 1 | 0.1011 | 0.032 | 0.05443 | 0.1879 |
| 49 | 9 | 1 | 0.0899 | 0.0303 | 0.04641 | 0.1741 |
| 50 | 8 | 1 | 0.0787 | 0.0285 | 0.03863 | 0.1601 |
| 51 | 7 | 1 | 0.0674 | 0.0266 | 0.03113 | 0.146 |
| 52 | 6 | 1 | 0.0562 | 0.0244 | 0.02397 | 0.1316 |
| 62 | 5 | 1 | 0.0449 | 0.022 | 0.01725 | 0.1171 |
| 63 | 4 | 1 | 0.0337 | 0.0191 | 0.01108 | 0.1025 |
| 69 | 3 | 1 | 0.0225 | 0.0157 | 0.00571 | 0.0885 |
| 70 | 2 | 1 | 0.0112 | 0.0112 | 0.0016 | 0.0789 |
| 94 | 1 | 1 | 0 | NaN | NA | NA |

**Table S24.** Alasehir station Kaplan-Meier survival estimates according to SPEI-12

| Kaplan-Meier Wet to Dry (SPEI12) | | | | | | |
| --- | --- | --- | --- | --- | --- | --- |
|  |  | n | events | median | 0.95LCL | 0.95UCL |
|  |  | 91 | 91 | 39 | 35 | 44 |
| time | n.risk | n.event | survival | std.err | lower 95% CI | upper 95% CI |
| 1 | 91 | 3 | 0.967 | 0.0187 | 0.93104 | 10.000 |
| 2 | 88 | 4 | 0.9231 | 0.0279 | 0.86992 | 0.9795 |
| 3 | 84 | 3 | 0.8901 | 0.0328 | 0.82812 | 0.9567 |
| 4 | 81 | 3 | 0.8571 | 0.0367 | 0.78818 | 0.9321 |
| 5 | 78 | 2 | 0.8352 | 0.0389 | 0.76231 | 0.915 |
| 6 | 76 | 1 | 0.8242 | 0.0399 | 0.74956 | 0.9062 |
| 10 | 75 | 1 | 0.8132 | 0.0409 | 0.73692 | 0.8973 |
| 11 | 74 | 1 | 0.8022 | 0.0418 | 0.72439 | 0.8884 |
| 12 | 73 | 3 | 0.7692 | 0.0442 | 0.68736 | 0.8609 |
| 13 | 70 | 2 | 0.7473 | 0.0456 | 0.66309 | 0.8421 |
| 14 | 68 | 2 | 0.7253 | 0.0468 | 0.63912 | 0.823 |
| 15 | 66 | 2 | 0.7033 | 0.0479 | 0.61543 | 0.8037 |
| 16 | 64 | 1 | 0.6923 | 0.0484 | 0.60369 | 0.7939 |
| 17 | 63 | 1 | 0.6813 | 0.0488 | 0.592 | 0.7841 |
| 28 | 62 | 1 | 0.6703 | 0.0493 | 0.58038 | 0.7742 |
| 29 | 61 | 1 | 0.6593 | 0.0497 | 0.56882 | 0.7643 |
| 30 | 60 | 1 | 0.6484 | 0.0501 | 0.55731 | 0.7543 |
| 31 | 59 | 1 | 0.6374 | 0.0504 | 0.54586 | 0.7442 |
| 32 | 58 | 1 | 0.6264 | 0.0507 | 0.53446 | 0.7341 |
| 33 | 57 | 1 | 0.6154 | 0.051 | 0.52312 | 0.7239 |
| 34 | 56 | 2 | 0.5934 | 0.0515 | 0.5006 | 0.7034 |
| 35 | 54 | 2 | 0.5714 | 0.0519 | 0.47828 | 0.6827 |
| 36 | 52 | 2 | 0.5495 | 0.0522 | 0.45617 | 0.6618 |
| 37 | 50 | 2 | 0.5275 | 0.0523 | 0.43426 | 0.6407 |
| 38 | 48 | 2 | 0.5055 | 0.0524 | 0.41254 | 0.6194 |
| 39 | 46 | 2 | 0.4835 | 0.0524 | 0.39101 | 0.5979 |
| 40 | 44 | 2 | 0.4615 | 0.0523 | 0.36968 | 0.5762 |
| 41 | 42 | 2 | 0.4396 | 0.052 | 0.34855 | 0.5543 |
| 42 | 40 | 2 | 0.4176 | 0.0517 | 0.32761 | 0.5323 |
| 43 | 38 | 1 | 0.4066 | 0.0515 | 0.31722 | 0.5211 |
| 44 | 37 | 2 | 0.3846 | 0.051 | 0.29659 | 0.4988 |
| 45 | 35 | 2 | 0.3626 | 0.0504 | 0.27617 | 0.4762 |
| 46 | 33 | 2 | 0.3407 | 0.0497 | 0.25597 | 0.4534 |
| 47 | 31 | 2 | 0.3187 | 0.0488 | 0.23599 | 0.4304 |
| 48 | 29 | 2 | 0.2967 | 0.0479 | 0.21624 | 0.4071 |
| 49 | 27 | 1 | 0.2857 | 0.0474 | 0.20647 | 0.3954 |
| 50 | 26 | 1 | 0.2747 | 0.0468 | 0.19675 | 0.3836 |
| 51 | 25 | 1 | 0.2637 | 0.0462 | 0.1871 | 0.3718 |
| 52 | 24 | 1 | 0.2527 | 0.0456 | 0.17752 | 0.3598 |
| 53 | 23 | 1 | 0.2418 | 0.0449 | 0.16802 | 0.3479 |
| 54 | 22 | 1 | 0.2308 | 0.0442 | 0.15859 | 0.3358 |
| 55 | 21 | 1 | 0.2198 | 0.0434 | 0.14923 | 0.3237 |
| 56 | 20 | 1 | 0.2088 | 0.0426 | 0.13996 | 0.3115 |
| 57 | 19 | 1 | 0.1978 | 0.0418 | 0.13078 | 0.2992 |
| 58 | 18 | 1 | 0.1868 | 0.0409 | 0.12169 | 0.2868 |
| 76 | 17 | 1 | 0.1758 | 0.0399 | 0.11269 | 0.2743 |
| 77 | 16 | 1 | 0.1648 | 0.0389 | 0.1038 | 0.2618 |
| 78 | 15 | 1 | 0.1538 | 0.0378 | 0.09502 | 0.2491 |
| 79 | 14 | 1 | 0.1429 | 0.0367 | 0.08636 | 0.2363 |
| 80 | 13 | 1 | 0.1319 | 0.0355 | 0.07784 | 0.2234 |
| 81 | 12 | 1 | 0.1209 | 0.0342 | 0.06946 | 0.2104 |
| 82 | 11 | 1 | 0.1099 | 0.0328 | 0.06124 | 0.1972 |
| 83 | 10 | 1 | 0.0989 | 0.0313 | 0.05319 | 0.1839 |
| 84 | 9 | 1 | 0.0879 | 0.0297 | 0.04536 | 0.1704 |
| 85 | 8 | 1 | 0.0769 | 0.0279 | 0.03775 | 0.1567 |
| 86 | 7 | 1 | 0.0659 | 0.026 | 0.03043 | 0.1429 |
| 87 | 6 | 1 | 0.0549 | 0.0239 | 0.02344 | 0.1288 |
| 88 | 5 | 1 | 0.044 | 0.0215 | 0.01686 | 0.1146 |
| 89 | 4 | 1 | 0.033 | 0.0187 | 0.01083 | 0.1003 |
| 94 | 3 | 1 | 0.022 | 0.0154 | 0.00558 | 0.0865 |
| 95 | 2 | 1 | 0.011 | 0.0109 | 0.00156 | 0.0772 |
| 98 | 1 | 1 | 0 | NaN | NA | NA |

**Table S25.** Alasehir station Kaplan-Meier drought risk estimates according to SPEI-3, 6, and 12

| Drought Risk (SPEI3) | | Drought Risk (SPEI6) | | Drought Risk (SPEI12) | |
| --- | --- | --- | --- | --- | --- |
| Time | Drought Risk | Time | Drought Risk | Time | Drought Risk |
| 1 | 0.0303 | 1 | 0.0337 | 1 | 0.033 |
| 2 | 0.0404 | 2 | 0.0899 | 2 | 0.0769 |
| 3 | 0.101 | 3 | 0.1348 | 3 | 0.1099 |
| 4 | 0.1515 | 4 | 0.1685 | 4 | 0.1429 |
| 5 | 0.2222 | 5 | 0.191 | 5 | 0.1648 |
| 6 | 0.303 | 6 | 0.2472 | 6 | 0.1758 |
| 7 | 0.404 | 7 | 0.2809 | 10 | 0.1868 |
| 8 | 0.4848 | 8 | 0.3258 | 11 | 0.1978 |
| 9 | 0.5556 | 9 | 0.3596 | 12 | 0.2308 |
| 10 | 0.6162 | 10 | 0.427 | 13 | 0.2527 |
| 11 | 0.6566 | 11 | 0.4494 | 14 | 0.2747 |
| 12 | 0.697 | 12 | 0.4719 | 15 | 0.2967 |
| 13 | 0.7172 | 13 | 0.4831 | 16 | 0.3077 |
| 14 | 0.7374 | 14 | 0.4944 | 17 | 0.3187 |
| 15 | 0.7475 | 15 | 0.5056 | 28 | 0.3297 |
| 18 | 0.7677 | 16 | 0.5169 | 29 | 0.3407 |
| 19 | 0.7778 | 17 | 0.5393 | 30 | 0.3516 |
| 20 | 0.7879 | 18 | 0.5618 | 31 | 0.3626 |
| 24 | 0.8081 | 19 | 0.573 | 32 | 0.3736 |
| 25 | 0.8283 | 20 | 0.5843 | 33 | 0.3846 |
| 26 | 0.8485 | 21 | 0.6067 | 34 | 0.4066 |
| 27 | 0.8687 | 23 | 0.618 | 35 | 0.4286 |
| 28 | 0.8889 | 24 | 0.6292 | 36 | 0.4505 |
| 29 | 0.899 | 25 | 0.6404 | 37 | 0.4725 |
| 30 | 0.9192 | 26 | 0.6517 | 38 | 0.4945 |
| 31 | 0.9293 | 27 | 0.6629 | 39 | 0.5165 |
| 32 | 0.9394 | 28 | 0.6742 | 40 | 0.5385 |
| 33 | 0.9495 | 29 | 0.6854 | 41 | 0.5604 |
| 34 | 0.9596 | 30 | 0.7079 | 42 | 0.5824 |
| 43 | 0.9697 | 31 | 0.7303 | 43 | 0.5934 |
| 62 | 0.9798 | 32 | 0.7416 | 44 | 0.6154 |
| 63 | 0.9899 | 33 | 0.7528 | 45 | 0.6374 |
| 67 | 1 | 34 | 0.764 | 46 | 0.6593 |
|  |  | 35 | 0.7753 | 47 | 0.6813 |
|  |  | 36 | 0.7865 | 48 | 0.7033 |
|  |  | 37 | 0.7978 | 49 | 0.7143 |
|  |  | 38 | 0.809 | 50 | 0.7253 |
|  |  | 39 | 0.8202 | 51 | 0.7363 |
|  |  | 40 | 0.8315 | 52 | 0.7473 |
|  |  | 41 | 0.8427 | 53 | 0.7582 |
|  |  | 42 | 0.8539 | 54 | 0.7692 |
|  |  | 43 | 0.8652 | 55 | 0.7802 |
|  |  | 46 | 0.8764 | 56 | 0.7912 |
|  |  | 47 | 0.8876 | 57 | 0.8022 |
|  |  | 48 | 0.8989 | 58 | 0.8132 |
|  |  | 49 | 0.9101 | 76 | 0.8242 |
|  |  | 50 | 0.9213 | 77 | 0.8352 |
|  |  | 51 | 0.9326 | 78 | 0.8462 |
|  |  | 52 | 0.9438 | 79 | 0.8571 |
|  |  | 62 | 0.9551 | 80 | 0.8681 |
|  |  | 63 | 0.9663 | 81 | 0.8791 |
|  |  | 69 | 0.9775 | 82 | 0.8901 |
|  |  | 70 | 0.9888 | 83 | 0.9011 |
|  |  | 94 | 1 | 84 | 0.9121 |
|  |  |  |  | 85 | 0.9231 |
|  |  |  |  | 86 | 0.9341 |
|  |  |  |  | 87 | 0.9451 |
|  |  |  |  | 88 | 0.956 |
|  |  |  |  | 89 | 0.967 |
|  |  |  |  | 94 | 0.978 |
|  |  |  |  | 95 | 0.989 |
|  |  |  |  | 98 | 1 |

**Table S26.** Aliaga station Kaplan-Meier survival estimates according to SPI-3

| Kaplan-Meier Wet to Dry (SPI3) | | | | | | |
| --- | --- | --- | --- | --- | --- | --- |
|  |  | n | events | median | 0.95LCL | 0.95UCL |
|  |  | 50 | 50 | 10.5 | 8 | 14 |
| time | n.risk | n.event | survival | std.err | lower 95% CL | upper 95% CL |
| 1 | 50 | 4 | 0.92 | 0.0384 | 0.84779 | 0.998 |
| 2 | 46 | 2 | 0.88 | 0.046 | 0.79438 | 0.975 |
| 3 | 44 | 3 | 0.82 | 0.0543 | 0.72014 | 0.934 |
| 4 | 41 | 5 | 0.72 | 0.0635 | 0.60571 | 0.856 |
| 5 | 36 | 1 | 0.7 | 0.0648 | 0.58384 | 0.839 |
| 7 | 35 | 3 | 0.64 | 0.0679 | 0.51987 | 0.788 |
| 8 | 32 | 1 | 0.62 | 0.0686 | 0.49906 | 0.77 |
| 9 | 31 | 3 | 0.56 | 0.0702 | 0.43801 | 0.716 |
| 10 | 28 | 3 | 0.5 | 0.0707 | 0.37896 | 0.66 |
| 11 | 25 | 3 | 0.44 | 0.0702 | 0.32185 | 0.602 |
| 12 | 22 | 2 | 0.4 | 0.0693 | 0.28486 | 0.562 |
| 13 | 20 | 2 | 0.36 | 0.0679 | 0.24877 | 0.521 |
| 14 | 18 | 4 | 0.28 | 0.0635 | 0.17952 | 0.437 |
| 15 | 14 | 2 | 0.24 | 0.0604 | 0.14655 | 0.393 |
| 16 | 12 | 2 | 0.2 | 0.0566 | 0.11489 | 0.348 |
| 17 | 10 | 1 | 0.18 | 0.0543 | 0.09962 | 0.325 |
| 18 | 9 | 2 | 0.14 | 0.0491 | 0.07043 | 0.278 |
| 19 | 7 | 1 | 0.12 | 0.046 | 0.05665 | 0.254 |
| 20 | 6 | 1 | 0.1 | 0.0424 | 0.04354 | 0.23 |
| 23 | 5 | 1 | 0.08 | 0.0384 | 0.03125 | 0.205 |
| 25 | 4 | 1 | 0.06 | 0.0336 | 0.02003 | 0.18 |
| 26 | 3 | 1 | 0.04 | 0.0277 | 0.01029 | 0.156 |
| 27 | 2 | 1 | 0.02 | 0.0198 | 0.00287 | 0.139 |
| 37 | 1 | 1 | 0 | NaN | NA | NA |

**Table S27.** Aliaga station Kaplan-Meier survival estimates according to SPI-6

| Kaplan-Meier Wet to Dry (SPI6) | | | | | | |
| --- | --- | --- | --- | --- | --- | --- |
|  |  | n | events | median | 0.95LCL | 0.95UCL |
|  |  | 51 | 51 | 14 | 10 | 19 |
| time | n.risk | n.event | survival | std.err | lower 95% CL | upper 95% CL |
| 1 | 51 | 5 | 0.902 | 0.0416 | 0.82393 | 0.987 |
| 2 | 46 | 3 | 0.8431 | 0.0509 | 0.74901 | 0.949 |
| 3 | 43 | 4 | 0.7647 | 0.0594 | 0.65672 | 0.89 |
| 4 | 39 | 3 | 0.7059 | 0.0638 | 0.59128 | 0.843 |
| 5 | 36 | 1 | 0.6863 | 0.065 | 0.57005 | 0.826 |
| 6 | 35 | 1 | 0.6667 | 0.066 | 0.54907 | 0.809 |
| 7 | 34 | 1 | 0.6471 | 0.0669 | 0.52834 | 0.792 |
| 8 | 33 | 1 | 0.6275 | 0.0677 | 0.50785 | 0.775 |
| 10 | 32 | 1 | 0.6078 | 0.0684 | 0.48759 | 0.758 |
| 11 | 31 | 2 | 0.5686 | 0.0694 | 0.44773 | 0.722 |
| 12 | 29 | 1 | 0.549 | 0.0697 | 0.42812 | 0.704 |
| 13 | 28 | 1 | 0.5294 | 0.0699 | 0.40871 | 0.686 |
| 14 | 27 | 2 | 0.4902 | 0.07 | 0.37052 | 0.649 |
| 15 | 25 | 1 | 0.4706 | 0.0699 | 0.35174 | 0.63 |
| 16 | 24 | 2 | 0.4314 | 0.0694 | 0.31478 | 0.591 |
| 17 | 22 | 2 | 0.3922 | 0.0684 | 0.27866 | 0.552 |
| 18 | 20 | 2 | 0.3529 | 0.0669 | 0.2434 | 0.512 |
| 19 | 18 | 3 | 0.2941 | 0.0638 | 0.19225 | 0.45 |
| 20 | 15 | 2 | 0.2549 | 0.061 | 0.15944 | 0.408 |
| 21 | 13 | 2 | 0.2157 | 0.0576 | 0.1278 | 0.364 |
| 22 | 11 | 2 | 0.1765 | 0.0534 | 0.09754 | 0.319 |
| 25 | 9 | 1 | 0.1569 | 0.0509 | 0.08302 | 0.296 |
| 26 | 8 | 1 | 0.1373 | 0.0482 | 0.06898 | 0.273 |
| 27 | 7 | 1 | 0.1176 | 0.0451 | 0.05548 | 0.249 |
| 28 | 6 | 1 | 0.098 | 0.0416 | 0.04265 | 0.225 |
| 29 | 5 | 1 | 0.0784 | 0.0376 | 0.03061 | 0.201 |
| 30 | 4 | 1 | 0.0588 | 0.0329 | 0.01962 | 0.176 |
| 37 | 3 | 1 | 0.0392 | 0.0272 | 0.01008 | 0.153 |
| 40 | 2 | 1 | 0.0196 | 0.0194 | 0.00282 | 0.137 |
| 41 | 1 | 1 | 0 | NaN | NA | NA |

**Table S28.** Aliaga station Kaplan-Meier survival estimates according to SPI-12

| Kaplan-Meier Wet to Dry (SPI12) | | | | | | |
| --- | --- | --- | --- | --- | --- | --- |
|  |  | n | events | median | 0.95LCL | 0.95UCL |
|  |  | 55 | 55 | 20 | 16 | 50 |
| time | n.risk | n.event | survival | std.err | lower 95% CL | upper 95% CL |
| 1 | 55 | 1 | 0.9818 | 0.018 | 0.94714 | 1 |
| 2 | 54 | 2 | 0.9455 | 0.0306 | 0.8873 | 1 |
| 3 | 52 | 2 | 0.9091 | 0.0388 | 0.8362 | 0.988 |
| 4 | 50 | 3 | 0.8545 | 0.0475 | 0.76627 | 0.953 |
| 5 | 47 | 1 | 0.8364 | 0.0499 | 0.74409 | 0.94 |
| 6 | 46 | 2 | 0.8 | 0.0539 | 0.70097 | 0.913 |
| 7 | 44 | 2 | 0.7636 | 0.0573 | 0.65922 | 0.885 |
| 8 | 42 | 1 | 0.7455 | 0.0587 | 0.63878 | 0.87 |
| 12 | 41 | 1 | 0.7273 | 0.0601 | 0.6186 | 0.855 |
| 13 | 40 | 1 | 0.7091 | 0.0612 | 0.59867 | 0.84 |
| 14 | 39 | 1 | 0.6909 | 0.0623 | 0.57896 | 0.824 |
| 15 | 38 | 3 | 0.6364 | 0.0649 | 0.52113 | 0.777 |
| 16 | 35 | 2 | 0.6 | 0.0661 | 0.48355 | 0.745 |
| 17 | 33 | 2 | 0.5636 | 0.0669 | 0.44669 | 0.711 |
| 18 | 31 | 1 | 0.5455 | 0.0671 | 0.42853 | 0.694 |
| 19 | 30 | 2 | 0.5091 | 0.0674 | 0.39272 | 0.66 |
| 20 | 28 | 2 | 0.4727 | 0.0673 | 0.3576 | 0.625 |
| 21 | 26 | 1 | 0.4545 | 0.0671 | 0.34029 | 0.607 |
| 22 | 25 | 1 | 0.4364 | 0.0669 | 0.32315 | 0.589 |
| 23 | 24 | 1 | 0.4182 | 0.0665 | 0.30618 | 0.571 |
| 24 | 23 | 1 | 0.4 | 0.0661 | 0.28939 | 0.553 |
| 25 | 22 | 1 | 0.3818 | 0.0655 | 0.27278 | 0.534 |
| 39 | 21 | 1 | 0.3636 | 0.0649 | 0.25635 | 0.516 |
| 50 | 20 | 1 | 0.3455 | 0.0641 | 0.24011 | 0.497 |
| 51 | 19 | 1 | 0.3273 | 0.0633 | 0.22405 | 0.478 |
| 52 | 18 | 1 | 0.3091 | 0.0623 | 0.2082 | 0.459 |
| 53 | 17 | 1 | 0.2909 | 0.0612 | 0.19256 | 0.439 |
| 54 | 16 | 1 | 0.2727 | 0.0601 | 0.17713 | 0.42 |
| 55 | 15 | 1 | 0.2545 | 0.0587 | 0.16194 | 0.4 |
| 56 | 14 | 1 | 0.2364 | 0.0573 | 0.14699 | 0.38 |
| 57 | 13 | 1 | 0.2182 | 0.0557 | 0.1323 | 0.36 |
| 58 | 12 | 1 | 0.2 | 0.0539 | 0.11789 | 0.339 |
| 59 | 11 | 1 | 0.1818 | 0.052 | 0.10379 | 0.319 |
| 60 | 10 | 1 | 0.1636 | 0.0499 | 0.09003 | 0.297 |
| 85 | 9 | 1 | 0.1455 | 0.0475 | 0.07665 | 0.276 |
| 86 | 8 | 1 | 0.1273 | 0.0449 | 0.06371 | 0.254 |
| 87 | 7 | 1 | 0.1091 | 0.042 | 0.05126 | 0.232 |
| 88 | 6 | 1 | 0.0909 | 0.0388 | 0.03941 | 0.21 |
| 89 | 5 | 1 | 0.0727 | 0.035 | 0.02831 | 0.187 |
| 90 | 4 | 1 | 0.0545 | 0.0306 | 0.01815 | 0.164 |
| 91 | 3 | 1 | 0.0364 | 0.0252 | 0.00933 | 0.142 |
| 92 | 2 | 1 | 0.0182 | 0.018 | 0.00261 | 0.127 |
| 93 | 1 | 1 | 0 | NaN | NA | NA |

**Table S29.** Aliaga station Kaplan-Meier drought risk estimates according to SPI-3, 6, and 12

| Drought Risk (SPI3) | | Drought Risk (SPI6) | | Drought Risk (SPI12) | |
| --- | --- | --- | --- | --- | --- |
| Time | Drought Risk | Time | Drought Risk | Time | Drought Risk |
| 1 | 0.08 | 1 | 0.098 | 1 | 0.0182 |
| 2 | 0.12 | 2 | 0.1569 | 2 | 0.0545 |
| 3 | 0.18 | 3 | 0.2353 | 3 | 0.0909 |
| 4 | 0.28 | 4 | 0.2941 | 4 | 0.1455 |
| 5 | 0.3 | 5 | 0.3137 | 5 | 0.1636 |
| 6 | 0.3414 | 6 | 0.3333 | 6 | 0.2 |
| 7 | 0.36 | 7 | 0.3529 | 7 | 0.2364 |
| 8 | 0.38 | 8 | 0.3725 | 8 | 0.2545 |
| 9 | 0.44 | 10 | 0.3922 | 12 | 0.2727 |
| 10 | 0.5 | 11 | 0.4314 | 13 | 0.2909 |
| 11 | 0.56 | 12 | 0.451 | 14 | 0.3091 |
| 12 | 0.6 | 13 | 0.4706 | 15 | 0.3636 |
| 13 | 0.64 | 14 | 0.5098 | 16 | 0.4 |
| 14 | 0.72 | 15 | 0.5294 | 17 | 0.4364 |
| 15 | 0.76 | 16 | 0.5686 | 18 | 0.4545 |
| 16 | 0.8 | 17 | 0.6078 | 19 | 0.4909 |
| 17 | 0.82 | 18 | 0.6471 | 20 | 0.5273 |
| 18 | 0.86 | 19 | 0.7059 | 21 | 0.5455 |
| 19 | 0.88 | 20 | 0.7451 | 22 | 0.5636 |
| 20 | 0.9 | 21 | 0.7843 | 23 | 0.5818 |
| 23 | 0.92 | 22 | 0.8235 | 24 | 0.6 |
| 25 | 0.94 | 25 | 0.8431 | 25 | 0.6182 |
| 26 | 0.96 | 26 | 0.8627 | 39 | 0.6364 |
| 27 | 0.98 | 27 | 0.8824 | 50 | 0.6545 |
| 37 | 1 | 28 | 0.902 | 51 | 0.6727 |
|  |  | 29 | 0.9216 | 52 | 0.6909 |
|  |  | 30 | 0.9412 | 53 | 0.7091 |
|  |  | 37 | 0.9608 | 54 | 0.7273 |
|  |  | 40 | 0.9804 | 55 | 0.7455 |
|  |  | 41 | 1 | 56 | 0.7636 |
|  |  |  |  | 57 | 0.7818 |
|  |  |  |  | 58 | 0.8 |
|  |  |  |  | 59 | 0.8182 |
|  |  |  |  | 60 | 0.8364 |
|  |  |  |  | 85 | 0.8545 |
|  |  |  |  | 86 | 0.8727 |
|  |  |  |  | 87 | 0.8909 |
|  |  |  |  | 88 | 0.9091 |
|  |  |  |  | 89 | 0.9273 |
|  |  |  |  | 90 | 0.9455 |
|  |  |  |  | 91 | 0.9636 |
|  |  |  |  | 92 | 0.9818 |
|  |  |  |  | 93 | 1 |

**Table S30.** Aliaga station Kaplan-Meier survival estimates according to SPEI-3

| Kaplan-Meier Wet to Dry (SPEI3) | | | | | | | |
| --- | --- | --- | --- | --- | --- | --- | --- |
|  |  | n | events | median | 0.95LCL | 0.95UCL |
|  |  | 58 | 58 | 8 | 6 | 11 |
| time | n.risk | n.event | survival | std.err | lower 95% CI | upper 95% CI |
| 1 | 58 | 4 | 0.931 | 0.0333 | 0.86805 | 0.999 |
| 2 | 54 | 2 | 0.8966 | 0.04 | 0.8215 | 0.978 |
| 3 | 52 | 7 | 0.7759 | 0.0548 | 0.67563 | 0.891 |
| 4 | 45 | 4 | 0.7069 | 0.0598 | 0.59894 | 0.834 |
| 5 | 41 | 4 | 0.6379 | 0.0631 | 0.5255 | 0.774 |
| 6 | 37 | 3 | 0.5862 | 0.0647 | 0.47222 | 0.728 |
| 7 | 34 | 4 | 0.5172 | 0.0656 | 0.40338 | 0.663 |
| 8 | 30 | 3 | 0.4655 | 0.0655 | 0.35332 | 0.613 |
| 9 | 27 | 3 | 0.4138 | 0.0647 | 0.30462 | 0.562 |
| 10 | 24 | 3 | 0.3621 | 0.0631 | 0.2573 | 0.51 |
| 11 | 21 | 3 | 0.3103 | 0.0607 | 0.21146 | 0.455 |
| 12 | 18 | 1 | 0.2931 | 0.0598 | 0.19654 | 0.437 |
| 13 | 17 | 3 | 0.2414 | 0.0562 | 0.15295 | 0.381 |
| 14 | 14 | 2 | 0.2069 | 0.0532 | 0.125 | 0.342 |
| 15 | 12 | 1 | 0.1897 | 0.0515 | 0.11141 | 0.323 |
| 16 | 11 | 2 | 0.1552 | 0.0475 | 0.08512 | 0.283 |
| 17 | 9 | 1 | 0.1379 | 0.0453 | 0.07248 | 0.262 |
| 18 | 8 | 3 | 0.0862 | 0.0369 | 0.0373 | 0.199 |
| 19 | 5 | 1 | 0.069 | 0.0333 | 0.02679 | 0.178 |
| 24 | 4 | 1 | 0.0517 | 0.0291 | 0.01718 | 0.156 |
| 25 | 3 | 1 | 0.0345 | 0.024 | 0.00883 | 0.135 |
| 26 | 2 | 1 | 0.0172 | 0.0171 | 0.00247 | 0.12 |
| 27 | 1 | 1 | 0 | NaN | NA | NA |

**Table S31.** Aliaga station Kaplan-Meier survival estimates according to SPEI-6

| Kaplan-Meier Wet to Dry (SPEI6) | | | | | | |
| --- | --- | --- | --- | --- | --- | --- |
|  |  | n | events | median | 0.95LCL | 0.95UCL |
|  |  | 63 | 63 | 12 | 6 | 16 |
| time | n.risk | n.event | survival | std.err | lower 95% CI | upper 95% CI |
| 1 | 63 | 6 | 0.9048 | 0.037 | 0.8351 | 0.98 |
| 2 | 57 | 5 | 0.8254 | 0.0478 | 0.73678 | 0.925 |
| 3 | 52 | 4 | 0.7619 | 0.0537 | 0.66367 | 0.875 |
| 4 | 48 | 5 | 0.6825 | 0.0586 | 0.57675 | 0.808 |
| 5 | 43 | 2 | 0.6508 | 0.0601 | 0.54311 | 0.78 |
| 6 | 41 | 3 | 0.6032 | 0.0616 | 0.4937 | 0.737 |
| 7 | 38 | 2 | 0.5714 | 0.0623 | 0.46141 | 0.708 |
| 8 | 36 | 1 | 0.5556 | 0.0626 | 0.44546 | 0.693 |
| 10 | 35 | 1 | 0.5397 | 0.0628 | 0.42963 | 0.678 |
| 11 | 34 | 1 | 0.5238 | 0.0629 | 0.41393 | 0.663 |
| 12 | 33 | 2 | 0.4921 | 0.063 | 0.38288 | 0.632 |
| 13 | 31 | 2 | 0.4603 | 0.0628 | 0.35232 | 0.601 |
| 14 | 29 | 3 | 0.4127 | 0.062 | 0.3074 | 0.554 |
| 15 | 26 | 2 | 0.381 | 0.0612 | 0.27808 | 0.522 |
| 16 | 24 | 3 | 0.3333 | 0.0594 | 0.23508 | 0.473 |
| 17 | 21 | 2 | 0.3016 | 0.0578 | 0.20712 | 0.439 |
| 18 | 19 | 2 | 0.2698 | 0.0559 | 0.17976 | 0.405 |
| 19 | 17 | 2 | 0.2381 | 0.0537 | 0.15308 | 0.37 |
| 20 | 15 | 1 | 0.2222 | 0.0524 | 0.14001 | 0.353 |
| 21 | 14 | 1 | 0.2063 | 0.051 | 0.12714 | 0.335 |
| 22 | 13 | 1 | 0.1905 | 0.0495 | 0.11449 | 0.317 |
| 23 | 12 | 1 | 0.1746 | 0.0478 | 0.10207 | 0.299 |
| 24 | 11 | 1 | 0.1587 | 0.046 | 0.0899 | 0.28 |
| 25 | 10 | 1 | 0.1429 | 0.0441 | 0.07802 | 0.262 |
| 26 | 9 | 1 | 0.127 | 0.0419 | 0.06646 | 0.243 |
| 27 | 8 | 1 | 0.1111 | 0.0396 | 0.05526 | 0.223 |
| 28 | 7 | 1 | 0.0952 | 0.037 | 0.04449 | 0.204 |
| 29 | 6 | 1 | 0.0794 | 0.0341 | 0.03423 | 0.184 |
| 30 | 5 | 1 | 0.0635 | 0.0307 | 0.0246 | 0.164 |
| 31 | 4 | 1 | 0.0476 | 0.0268 | 0.01578 | 0.144 |
| 64 | 3 | 1 | 0.0317 | 0.0221 | 0.00812 | 0.124 |
| 65 | 2 | 1 | 0.0159 | 0.0157 | 0.00227 | 0.111 |
| 66 | 1 | 1 | 0 | NaN | NA | NA |

**Table S32.** Aliaga station Kaplan-Meier survival estimates according to SPEI-12

| Kaplan-Meier Wet to Dry (SPEI12) | | | | | | | |
| --- | --- | --- | --- | --- | --- | --- | --- |
|  |  | n | events | median | 0.95LCL | 0.95UCL |
|  |  | 61 | 61 | 15 | 12 | 21 |
| time | n.risk | n.event | survival | std.err | lower 95% CI | upper 95% CI |
| 1 | 61 | 3 | 0.9508 | 0.0277 | 0.89807 | 1.000 |
| 2 | 58 | 3 | 0.9016 | 0.0381 | 0.82992 | 0.98 |
| 3 | 55 | 3 | 0.8525 | 0.0454 | 0.76795 | 0.946 |
| 4 | 52 | 1 | 0.8361 | 0.0474 | 0.74814 | 0.934 |
| 5 | 51 | 3 | 0.7869 | 0.0524 | 0.69055 | 0.897 |
| 6 | 48 | 3 | 0.7377 | 0.0563 | 0.63518 | 0.857 |
| 7 | 45 | 2 | 0.7049 | 0.0584 | 0.59927 | 0.829 |
| 8 | 43 | 2 | 0.6721 | 0.0601 | 0.56407 | 0.801 |
| 9 | 41 | 1 | 0.6557 | 0.0608 | 0.54672 | 0.786 |
| 10 | 40 | 1 | 0.6393 | 0.0615 | 0.52952 | 0.772 |
| 11 | 39 | 1 | 0.623 | 0.0621 | 0.51247 | 0.757 |
| 12 | 38 | 3 | 0.5738 | 0.0633 | 0.46217 | 0.712 |
| 13 | 35 | 1 | 0.5574 | 0.0636 | 0.44569 | 0.697 |
| 14 | 34 | 2 | 0.5246 | 0.0639 | 0.41311 | 0.666 |
| 15 | 32 | 2 | 0.4918 | 0.064 | 0.38107 | 0.635 |
| 16 | 30 | 2 | 0.459 | 0.0638 | 0.34955 | 0.603 |
| 17 | 28 | 2 | 0.4262 | 0.0633 | 0.31856 | 0.57 |
| 18 | 26 | 1 | 0.4098 | 0.063 | 0.30327 | 0.554 |
| 19 | 25 | 1 | 0.3934 | 0.0625 | 0.28811 | 0.537 |
| 20 | 24 | 2 | 0.3607 | 0.0615 | 0.25822 | 0.504 |
| 21 | 22 | 3 | 0.3115 | 0.0593 | 0.21448 | 0.452 |
| 63 | 19 | 1 | 0.2951 | 0.0584 | 0.20021 | 0.435 |
| 64 | 18 | 1 | 0.2787 | 0.0574 | 0.18612 | 0.417 |
| 65 | 17 | 1 | 0.2623 | 0.0563 | 0.17219 | 0.4 |
| 66 | 16 | 1 | 0.2459 | 0.0551 | 0.15846 | 0.382 |
| 67 | 15 | 1 | 0.2295 | 0.0538 | 0.14491 | 0.363 |
| 68 | 14 | 1 | 0.2131 | 0.0524 | 0.13158 | 0.345 |
| 69 | 13 | 1 | 0.1967 | 0.0509 | 0.11847 | 0.327 |
| 70 | 12 | 1 | 0.1803 | 0.0492 | 0.10561 | 0.308 |
| 71 | 11 | 1 | 0.1639 | 0.0474 | 0.09301 | 0.289 |
| 72 | 10 | 1 | 0.1475 | 0.0454 | 0.08071 | 0.27 |
| 73 | 9 | 1 | 0.1311 | 0.0432 | 0.06875 | 0.25 |
| 74 | 8 | 1 | 0.1148 | 0.0408 | 0.05716 | 0.23 |
| 90 | 7 | 1 | 0.0984 | 0.0381 | 0.04601 | 0.21 |
| 91 | 6 | 1 | 0.082 | 0.0351 | 0.03539 | 0.19 |
| 92 | 5 | 1 | 0.0656 | 0.0317 | 0.02543 | 0.169 |
| 93 | 4 | 1 | 0.0492 | 0.0277 | 0.01631 | 0.148 |
| 94 | 3 | 1 | 0.0328 | 0.0228 | 0.00839 | 0.128 |
| 95 | 2 | 1 | 0.0164 | 0.0163 | 0.00235 | 0.115 |
| 96 | 1 | 1 | 0 | NaN | NA | NA |

**Table S33.** Aliaga station Kaplan-Meier drought risk estimates according to SPEI-3, 6, and 12

| Drought Risk (SPEI3) | | Drought Risk (SPEI6) | | Drought Risk (SPEI12) | |
| --- | --- | --- | --- | --- | --- |
| Time | Drought Risk | Time | Drought Risk | Time | Drought Risk |
| 1 | 0.069 | 1 | 0.0952 | 1 | 0.0492 |
| 2 | 0.1034 | 2 | 0.1746 | 2 | 0.0984 |
| 3 | 0.2241 | 3 | 0.2381 | 3 | 0.1475 |
| 4 | 0.2931 | 4 | 0.3175 | 4 | 0.1639 |
| 5 | 0.3621 | 5 | 0.3492 | 5 | 0.2131 |
| 6 | 0.4138 | 6 | 0.3968 | 6 | 0.2623 |
| 7 | 0.4828 | 7 | 0.4286 | 7 | 0.2951 |
| 8 | 0.5345 | 8 | 0.4444 | 8 | 0.3279 |
| 9 | 0.5862 | 10 | 0.4603 | 9 | 0.3443 |
| 10 | 0.6379 | 11 | 0.4762 | 10 | 0.3607 |
| 11 | 0.6897 | 12 | 0.5079 | 11 | 0.377 |
| 12 | 0.7069 | 13 | 0.5397 | 12 | 0.4262 |
| 13 | 0.7586 | 14 | 0.5873 | 13 | 0.4426 |
| 14 | 0.7931 | 15 | 0.619 | 14 | 0.4754 |
| 15 | 0.8103 | 16 | 0.6667 | 15 | 0.5082 |
| 16 | 0.8448 | 17 | 0.6984 | 16 | 0.541 |
| 17 | 0.8621 | 18 | 0.7302 | 17 | 0.5738 |
| 18 | 0.9138 | 19 | 0.7619 | 18 | 0.5902 |
| 19 | 0.931 | 20 | 0.7778 | 19 | 0.6066 |
| 24 | 0.9483 | 21 | 0.7937 | 20 | 0.6393 |
| 25 | 0.9655 | 22 | 0.8095 | 21 | 0.6885 |
| 26 | 0.9828 | 23 | 0.8254 | 63 | 0.7049 |
| 27 | 1 | 24 | 0.8413 | 64 | 0.7213 |
|  |  | 25 | 0.8571 | 65 | 0.7377 |
|  |  | 26 | 0.873 | 66 | 0.7541 |
|  |  | 27 | 0.8889 | 67 | 0.7705 |
|  |  | 28 | 0.9048 | 68 | 0.7869 |
|  |  | 29 | 0.9206 | 69 | 0.8033 |
|  |  | 30 | 0.9365 | 70 | 0.8197 |
|  |  | 31 | 0.9524 | 71 | 0.8361 |
|  |  | 64 | 0.9683 | 72 | 0.8525 |
|  |  | 65 | 0.9841 | 73 | 0.8689 |
|  |  | 66 | 1 | 74 | 0.8852 |
|  |  |  |  | 90 | 0.9016 |
|  |  |  |  | 91 | 0.918 |
|  |  |  |  | 92 | 0.9344 |
|  |  |  |  | 93 | 0.9508 |
|  |  |  |  | 94 | 0.9672 |
|  |  |  |  | 95 | 0.9836 |
|  |  |  |  | 96 | 1 |

**Table S34.** Bornova station Kaplan-Meier survival estimates according to SPI-3

| Kaplan-Meier Wet to Dry (SPI3) | | | | | | |
| --- | --- | --- | --- | --- | --- | --- |
|  |  | n | events | median | 0.95LCL | 0.95UCL |
|  |  | 74 | 74 | 8 | 6 | 10 |
| time | n.risk | n.event | survival | std.err | lower 95% CL | upper 95% CL |
| 1 | 74 | 5 | 0.9324 | 0.0292 | 0.87696 | 0.9914 |
| 2 | 69 | 5 | 0.8649 | 0.0397 | 0.79038 | 0.9464 |
| 3 | 64 | 5 | 0.7973 | 0.0467 | 0.71077 | 0.8944 |
| 4 | 59 | 5 | 0.7297 | 0.0516 | 0.63525 | 0.8383 |
| 5 | 54 | 5 | 0.6622 | 0.055 | 0.56271 | 0.7792 |
| 6 | 49 | 5 | 0.5946 | 0.0571 | 0.49262 | 0.7177 |
| 7 | 44 | 6 | 0.5135 | 0.0581 | 0.41138 | 0.641 |
| 8 | 38 | 6 | 0.4324 | 0.0576 | 0.33309 | 0.5614 |
| 9 | 32 | 3 | 0.3919 | 0.0567 | 0.29506 | 0.5205 |
| 10 | 29 | 2 | 0.3649 | 0.056 | 0.27013 | 0.4928 |
| 11 | 27 | 3 | 0.3243 | 0.0544 | 0.23343 | 0.4506 |
| 12 | 24 | 2 | 0.2973 | 0.0531 | 0.20944 | 0.422 |
| 13 | 22 | 2 | 0.2703 | 0.0516 | 0.18587 | 0.393 |
| 14 | 20 | 1 | 0.2568 | 0.0508 | 0.17425 | 0.3783 |
| 15 | 19 | 3 | 0.2162 | 0.0479 | 0.14012 | 0.3336 |
| 16 | 16 | 2 | 0.1892 | 0.0455 | 0.11805 | 0.3032 |
| 17 | 14 | 2 | 0.1622 | 0.0428 | 0.09661 | 0.2722 |
| 18 | 12 | 2 | 0.1351 | 0.0397 | 0.07593 | 0.2405 |
| 20 | 10 | 1 | 0.1216 | 0.038 | 0.06593 | 0.2244 |
| 21 | 9 | 2 | 0.0946 | 0.034 | 0.04675 | 0.1914 |
| 22 | 7 | 1 | 0.0811 | 0.0317 | 0.03765 | 0.1746 |
| 23 | 6 | 1 | 0.0676 | 0.0292 | 0.02898 | 0.1575 |
| 26 | 5 | 1 | 0.0541 | 0.0263 | 0.02084 | 0.1402 |
| 27 | 4 | 1 | 0.0405 | 0.0229 | 0.01338 | 0.1228 |
| 28 | 3 | 1 | 0.027 | 0.0189 | 0.00689 | 0.106 |
| 37 | 2 | 1 | 0.0135 | 0.0134 | 0.00193 | 0.0947 |
| 38 | 1 | 1 | 0 | NaN | NA | NA |

**Table S35.** Bornova station Kaplan-Meier survival estimates according to SPI-6

| Kaplan-Meier Wet to Dry (SPI6) | | | | | | |
| --- | --- | --- | --- | --- | --- | --- |
|  |  | n | events | median | 0.95LCL | 0.95UCL |
|  |  | 85 | 85 | 11 | 8 | 14 |
| time | n.risk | n.event | survival | std.err | lower 95% CL | upper 95% CL |
| 1 | 85 | 6 | 0.9294 | 0.0278 | 0.87652 | 0.9855 |
| 2 | 79 | 8 | 0.8353 | 0.0402 | 0.76005 | 0.918 |
| 3 | 71 | 2 | 0.8118 | 0.0424 | 0.73278 | 0.8993 |
| 4 | 69 | 2 | 0.7882 | 0.0443 | 0.70599 | 0.8801 |
| 5 | 67 | 4 | 0.7412 | 0.0475 | 0.65368 | 0.8404 |
| 6 | 63 | 5 | 0.6824 | 0.0505 | 0.59022 | 0.7889 |
| 7 | 58 | 5 | 0.6235 | 0.0526 | 0.52859 | 0.7355 |
| 8 | 53 | 4 | 0.5765 | 0.0536 | 0.48044 | 0.6917 |
| 9 | 49 | 2 | 0.5529 | 0.0539 | 0.45673 | 0.6694 |
| 10 | 47 | 4 | 0.5059 | 0.0542 | 0.41002 | 0.6242 |
| 11 | 43 | 3 | 0.4706 | 0.0541 | 0.37559 | 0.5896 |
| 12 | 40 | 2 | 0.4471 | 0.0539 | 0.35293 | 0.5663 |
| 13 | 38 | 3 | 0.4118 | 0.0534 | 0.31937 | 0.5309 |
| 14 | 35 | 3 | 0.3765 | 0.0526 | 0.28636 | 0.4949 |
| 15 | 32 | 2 | 0.3529 | 0.0518 | 0.26466 | 0.4707 |
| 16 | 30 | 3 | 0.3176 | 0.0505 | 0.23261 | 0.4338 |
| 17 | 27 | 2 | 0.2941 | 0.0494 | 0.21159 | 0.4088 |
| 18 | 25 | 3 | 0.2588 | 0.0475 | 0.18062 | 0.3709 |
| 19 | 22 | 2 | 0.2353 | 0.046 | 0.16039 | 0.3452 |
| 20 | 20 | 2 | 0.2118 | 0.0443 | 0.14052 | 0.3191 |
| 21 | 18 | 1 | 0.2 | 0.0434 | 0.13073 | 0.306 |
| 27 | 17 | 1 | 0.1882 | 0.0424 | 0.12105 | 0.2927 |
| 36 | 16 | 1 | 0.1765 | 0.0413 | 0.11149 | 0.2793 |
| 37 | 15 | 1 | 0.1647 | 0.0402 | 0.10205 | 0.2658 |
| 38 | 14 | 2 | 0.1412 | 0.0378 | 0.08357 | 0.2385 |
| 39 | 12 | 1 | 0.1294 | 0.0364 | 0.07456 | 0.2246 |
| 40 | 11 | 1 | 0.1176 | 0.0349 | 0.06573 | 0.2106 |
| 41 | 10 | 2 | 0.0941 | 0.0317 | 0.04867 | 0.182 |
| 42 | 8 | 2 | 0.0706 | 0.0278 | 0.03264 | 0.1527 |
| 43 | 6 | 1 | 0.0588 | 0.0255 | 0.02513 | 0.1377 |
| 44 | 5 | 1 | 0.0471 | 0.023 | 0.01808 | 0.1225 |
| 45 | 4 | 2 | 0.0235 | 0.0164 | 0.00598 | 0.0926 |
| 46 | 2 | 1 | 0.0118 | 0.0117 | 0.00168 | 0.0826 |
| 47 | 1 | 1 | 0 | NaN | NA | NA |

**Table S36.** Bornova station Kaplan-Meier survival estimates according to SPI-12

| Kaplan-Meier Wet to Dry (SPI12) | | | | | | |
| --- | --- | --- | --- | --- | --- | --- |
|  |  | n | events | median | 0.95LCL | 0.95UCL |
|  |  | 79 | 79 | 15 | 11 | 21 |
| time | n.risk | n.event | survival | std.err | lower 95% CL | upper 95% CL |
| 1 | 79 | 4 | 0.9494 | 0.0247 | 0.90223 | 0.999 |
| 2 | 75 | 5 | 0.8861 | 0.0357 | 0.81871 | 0.959 |
| 3 | 70 | 3 | 0.8481 | 0.0404 | 0.77253 | 0.9311 |
| 4 | 67 | 3 | 0.8101 | 0.0441 | 0.7281 | 0.9014 |
| 5 | 64 | 2 | 0.7848 | 0.0462 | 0.69923 | 0.8809 |
| 6 | 62 | 1 | 0.7722 | 0.0472 | 0.68498 | 0.8704 |
| 7 | 61 | 2 | 0.7468 | 0.0489 | 0.65685 | 0.8491 |
| 8 | 59 | 4 | 0.6962 | 0.0517 | 0.60183 | 0.8054 |
| 9 | 55 | 4 | 0.6456 | 0.0538 | 0.54826 | 0.7602 |
| 10 | 51 | 2 | 0.6203 | 0.0546 | 0.52196 | 0.7371 |
| 11 | 49 | 3 | 0.5823 | 0.0555 | 0.48308 | 0.7019 |
| 12 | 46 | 2 | 0.557 | 0.0559 | 0.45752 | 0.678 |
| 13 | 44 | 2 | 0.5316 | 0.0561 | 0.43225 | 0.6539 |
| 14 | 42 | 2 | 0.5063 | 0.0562 | 0.40726 | 0.6295 |
| 15 | 40 | 1 | 0.4937 | 0.0562 | 0.39487 | 0.6172 |
| 16 | 39 | 1 | 0.481 | 0.0562 | 0.38254 | 0.6048 |
| 17 | 38 | 2 | 0.4557 | 0.056 | 0.3581 | 0.5799 |
| 18 | 36 | 2 | 0.4304 | 0.0557 | 0.33395 | 0.5547 |
| 19 | 34 | 2 | 0.4051 | 0.0552 | 0.31007 | 0.5292 |
| 20 | 32 | 2 | 0.3797 | 0.0546 | 0.28648 | 0.5034 |
| 21 | 30 | 1 | 0.3671 | 0.0542 | 0.2748 | 0.4904 |
| 22 | 29 | 1 | 0.3544 | 0.0538 | 0.2632 | 0.4773 |
| 36 | 28 | 2 | 0.3291 | 0.0529 | 0.24022 | 0.4509 |
| 37 | 26 | 2 | 0.3038 | 0.0517 | 0.21757 | 0.4242 |
| 38 | 24 | 1 | 0.2911 | 0.0511 | 0.20638 | 0.4107 |
| 39 | 23 | 1 | 0.2785 | 0.0504 | 0.19527 | 0.3971 |
| 40 | 22 | 2 | 0.2532 | 0.0489 | 0.17335 | 0.3697 |
| 41 | 20 | 3 | 0.2152 | 0.0462 | 0.14123 | 0.3279 |
| 42 | 17 | 3 | 0.1772 | 0.043 | 0.11019 | 0.285 |
| 43 | 14 | 2 | 0.1519 | 0.0404 | 0.09021 | 0.2558 |
| 44 | 12 | 2 | 0.1266 | 0.0374 | 0.07093 | 0.2259 |
| 45 | 10 | 2 | 0.1013 | 0.0339 | 0.0525 | 0.1953 |
| 46 | 8 | 1 | 0.0886 | 0.032 | 0.04368 | 0.1797 |
| 47 | 7 | 1 | 0.0759 | 0.0298 | 0.03519 | 0.1639 |
| 48 | 6 | 1 | 0.0633 | 0.0274 | 0.0271 | 0.1478 |
| 49 | 5 | 1 | 0.0506 | 0.0247 | 0.01949 | 0.1316 |
| 50 | 4 | 2 | 0.0253 | 0.0177 | 0.00644 | 0.0995 |
| 51 | 2 | 1 | 0.0127 | 0.0126 | 0.00181 | 0.0888 |
| 118 | 1 | 1 | 0 | NaN | NA | NA |

**Table S37.** Bornova station Kaplan-Meier drought risk estimates according to SPI-3, 6, and 12

| Drought Risk (SPI3) | | Drought Risk (SPI6) | | Drought Risk (SPI12) | |
| --- | --- | --- | --- | --- | --- |
| Time | Drought Risk | Time | Drought Risk | Time | Drought Risk |
| 1 | 0.0676 | 1 | 0.0706 | 1 | 0.0506 |
| 2 | 0.1351 | 2 | 0.1647 | 2 | 0.1139 |
| 3 | 0.2027 | 3 | 0.1882 | 3 | 0.1519 |
| 4 | 0.2703 | 4 | 0.2118 | 4 | 0.1899 |
| 5 | 0.3378 | 5 | 0.2588 | 5 | 0.2152 |
| 6 | 0.4054 | 6 | 0.3176 | 6 | 0.2278 |
| 7 | 0.4865 | 7 | 0.3765 | 7 | 0.2532 |
| 8 | 0.5676 | 8 | 0.4235 | 8 | 0.3038 |
| 9 | 0.6081 | 9 | 0.4471 | 9 | 0.3544 |
| 10 | 0.6351 | 10 | 0.4941 | 10 | 0.3797 |
| 11 | 0.6757 | 11 | 0.5294 | 11 | 0.4177 |
| 12 | 0.7027 | 12 | 0.5529 | 12 | 0.443 |
| 13 | 0.7297 | 13 | 0.5882 | 13 | 0.4684 |
| 14 | 0.7432 | 14 | 0.6235 | 14 | 0.4937 |
| 15 | 0.7838 | 15 | 0.6471 | 15 | 0.5063 |
| 16 | 0.8108 | 16 | 0.6824 | 16 | 0.519 |
| 17 | 0.8378 | 17 | 0.7059 | 17 | 0.5443 |
| 18 | 0.8649 | 18 | 0.7412 | 18 | 0.5696 |
| 20 | 0.8784 | 19 | 0.7647 | 19 | 0.5949 |
| 21 | 0.9054 | 20 | 0.7882 | 20 | 0.6203 |
| 22 | 0.9189 | 21 | 0.8 | 21 | 0.6329 |
| 23 | 0.9324 | 27 | 0.8118 | 22 | 0.6456 |
| 26 | 0.9459 | 36 | 0.8235 | 36 | 0.6709 |
| 27 | 0.9595 | 37 | 0.8353 | 37 | 0.6962 |
| 28 | 0.973 | 38 | 0.8588 | 38 | 0.7089 |
| 37 | 0.9865 | 39 | 0.8706 | 39 | 0.7215 |
| 38 | 1 | 40 | 0.8824 | 40 | 0.7468 |
|  |  | 41 | 0.9059 | 41 | 0.7848 |
|  |  | 42 | 0.9294 | 42 | 0.8228 |
|  |  | 43 | 0.9412 | 43 | 0.8481 |
|  |  | 44 | 0.9529 | 44 | 0.8734 |
|  |  | 45 | 0.9765 | 45 | 0.8987 |
|  |  | 46 | 0.9882 | 46 | 0.9114 |
|  |  | 47 | 1 | 47 | 0.9241 |
|  |  |  |  | 48 | 0.9367 |
|  |  |  |  | 49 | 0.9494 |
|  |  |  |  | 50 | 0.9747 |
|  |  |  |  | 51 | 0.9873 |
|  |  |  |  | 118 | 1 |

**Table S38.** Bornova station Kaplan-Meier survival estimates according to SPEI-3

| Kaplan-Meier Wet to Dry (SPEI3) | | | | | | |
| --- | --- | --- | --- | --- | --- | --- |
|  |  | n | events | median | 0.95LCL | 0.95UCL |
|  |  | 94 | 94 | 8 | 6 | 10 |
| time | n.risk | n.event | survival | std.err | lower 95% CI | upper 95% CI |
| 1 | 94 | 7 | 0.9255 | 0.0271 | 0.87395 | 0.9802 |
| 2 | 87 | 3 | 0.8936 | 0.0318 | 0.83341 | 0.9582 |
| 3 | 84 | 6 | 0.8298 | 0.0388 | 0.75719 | 0.9093 |
| 4 | 78 | 8 | 0.7447 | 0.045 | 0.66155 | 0.8383 |
| 5 | 70 | 9 | 0.6489 | 0.0492 | 0.55928 | 0.753 |
| 6 | 61 | 6 | 0.5851 | 0.0508 | 0.49352 | 0.6937 |
| 7 | 55 | 7 | 0.5106 | 0.0516 | 0.41895 | 0.6224 |
| 8 | 48 | 6 | 0.4468 | 0.0513 | 0.35681 | 0.5595 |
| 9 | 42 | 4 | 0.4043 | 0.0506 | 0.31628 | 0.5167 |
| 10 | 38 | 5 | 0.3511 | 0.0492 | 0.2667 | 0.4621 |
| 11 | 33 | 6 | 0.2872 | 0.0467 | 0.2089 | 0.3949 |
| 12 | 27 | 2 | 0.266 | 0.0456 | 0.19009 | 0.3721 |
| 13 | 25 | 4 | 0.2234 | 0.043 | 0.15325 | 0.3257 |
| 14 | 21 | 2 | 0.2021 | 0.0414 | 0.13527 | 0.302 |
| 15 | 19 | 3 | 0.1702 | 0.0388 | 0.10893 | 0.266 |
| 16 | 16 | 3 | 0.1383 | 0.0356 | 0.0835 | 0.2291 |
| 17 | 13 | 1 | 0.1277 | 0.0344 | 0.07526 | 0.2165 |
| 18 | 12 | 2 | 0.1064 | 0.0318 | 0.05921 | 0.1911 |
| 19 | 10 | 1 | 0.0957 | 0.0303 | 0.05144 | 0.1782 |
| 21 | 9 | 1 | 0.0851 | 0.0288 | 0.04386 | 0.1651 |
| 25 | 8 | 1 | 0.0745 | 0.0271 | 0.03651 | 0.1519 |
| 26 | 7 | 2 | 0.0532 | 0.0231 | 0.02267 | 0.1248 |
| 27 | 5 | 1 | 0.0426 | 0.0208 | 0.01631 | 0.111 |
| 30 | 4 | 1 | 0.0319 | 0.0181 | 0.01048 | 0.0972 |
| 31 | 3 | 1 | 0.0213 | 0.0149 | 0.0054 | 0.0838 |
| 36 | 2 | 1 | 0.0106 | 0.0106 | 0.00151 | 0.0747 |
| 37 | 1 | 1 | 0 | NaN | NA | NA |

**Table S39.** Bornova station Kaplan-Meier survival estimates according to SPEI-6

| Kaplan-Meier Wet to Dry (SPEI6) | | | | | | |
| --- | --- | --- | --- | --- | --- | --- |
|  |  | n | events | median | 0.95LCL | 0.95UCL |
|  |  | 97 | 97 | 8 | 7 | 11 |
| time | n.risk | n.event | survival | std.err | lower 95% CI | upper 95% CI |
| 1 | 97 | 8 | 0.9175 | 0.0279 | 0.86438 | 0.9739 |
| 2 | 89 | 9 | 0.8247 | 0.0386 | 0.75245 | 0.904 |
| 3 | 80 | 9 | 0.732 | 0.045 | 0.64891 | 0.8256 |
| 4 | 71 | 4 | 0.6907 | 0.0469 | 0.6046 | 0.7891 |
| 5 | 67 | 3 | 0.6598 | 0.0481 | 0.57194 | 0.7611 |
| 6 | 64 | 6 | 0.5979 | 0.0498 | 0.50791 | 0.7039 |
| 7 | 58 | 5 | 0.5464 | 0.0505 | 0.45578 | 0.655 |
| 8 | 53 | 5 | 0.4948 | 0.0508 | 0.40471 | 0.6051 |
| 9 | 48 | 4 | 0.4536 | 0.0505 | 0.36461 | 0.5643 |
| 10 | 44 | 4 | 0.4124 | 0.05 | 0.32518 | 0.5229 |
| 11 | 40 | 5 | 0.3608 | 0.0488 | 0.27686 | 0.4702 |
| 12 | 35 | 2 | 0.3402 | 0.0481 | 0.25786 | 0.4489 |
| 13 | 33 | 2 | 0.3196 | 0.0473 | 0.23905 | 0.4273 |
| 14 | 31 | 2 | 0.299 | 0.0465 | 0.22044 | 0.4055 |
| 15 | 29 | 3 | 0.268 | 0.045 | 0.19292 | 0.3724 |
| 16 | 26 | 3 | 0.2371 | 0.0432 | 0.16593 | 0.3388 |
| 17 | 23 | 2 | 0.2165 | 0.0418 | 0.14826 | 0.3161 |
| 18 | 21 | 2 | 0.1959 | 0.0403 | 0.13088 | 0.2932 |
| 19 | 19 | 1 | 0.1856 | 0.0395 | 0.1223 | 0.2816 |
| 20 | 18 | 2 | 0.1649 | 0.0377 | 0.10541 | 0.2581 |
| 21 | 16 | 2 | 0.1443 | 0.0357 | 0.0889 | 0.2343 |
| 22 | 14 | 2 | 0.1237 | 0.0334 | 0.07284 | 0.2101 |
| 26 | 12 | 1 | 0.1134 | 0.0322 | 0.06501 | 0.1978 |
| 27 | 11 | 1 | 0.1031 | 0.0309 | 0.05732 | 0.1854 |
| 30 | 10 | 1 | 0.0928 | 0.0295 | 0.0498 | 0.1729 |
| 39 | 9 | 1 | 0.0825 | 0.0279 | 0.04247 | 0.1602 |
| 57 | 8 | 1 | 0.0722 | 0.0263 | 0.03535 | 0.1473 |
| 58 | 7 | 1 | 0.0619 | 0.0245 | 0.0285 | 0.1343 |
| 59 | 6 | 1 | 0.0515 | 0.0225 | 0.02195 | 0.121 |
| 60 | 5 | 1 | 0.0412 | 0.0202 | 0.0158 | 0.1077 |
| 61 | 4 | 1 | 0.0309 | 0.0176 | 0.01015 | 0.0942 |
| 62 | 3 | 1 | 0.0206 | 0.0144 | 0.00523 | 0.0813 |
| 64 | 2 | 1 | 0.0103 | 0.0103 | 0.00147 | 0.0724 |
| 65 | 1 | 1 | 0 | NaN | NA | NA |

**Table S40.** Bornova station Kaplan-Meier survival estimates according to SPEI-12

| Kaplan-Meier Wet to Dry (SPEI12) | | | | | | |
| --- | --- | --- | --- | --- | --- | --- |
|  |  | n | events | median | 0.95LCL | 0.95UCL |
|  |  | 99 | 99 | 12 | 9 | 16 |
| time | n.risk | n.event | survival | std.err | lower 95% CI | upper 95% CI |
| 1 | 99 | 9 | 0.9091 | 0.0289 | 0.85419 | 0.9675 |
| 2 | 90 | 7 | 0.8384 | 0.037 | 0.76892 | 0.9141 |
| 3 | 83 | 5 | 0.7879 | 0.0411 | 0.71133 | 0.8727 |
| 4 | 78 | 5 | 0.7374 | 0.0442 | 0.65559 | 0.8294 |
| 5 | 73 | 5 | 0.6869 | 0.0466 | 0.60133 | 0.7846 |
| 6 | 68 | 2 | 0.6667 | 0.0474 | 0.57998 | 0.7663 |
| 7 | 66 | 3 | 0.6364 | 0.0483 | 0.54832 | 0.7385 |
| 8 | 63 | 3 | 0.6061 | 0.0491 | 0.51706 | 0.7104 |
| 9 | 60 | 4 | 0.5657 | 0.0498 | 0.47598 | 0.6722 |
| 10 | 56 | 4 | 0.5253 | 0.0502 | 0.43555 | 0.6334 |
| 11 | 52 | 2 | 0.5051 | 0.0502 | 0.41557 | 0.6138 |
| 12 | 50 | 4 | 0.4646 | 0.0501 | 0.37609 | 0.5741 |
| 13 | 46 | 3 | 0.4343 | 0.0498 | 0.3469 | 0.5438 |
| 14 | 43 | 2 | 0.4141 | 0.0495 | 0.32764 | 0.5235 |
| 15 | 41 | 2 | 0.3939 | 0.0491 | 0.30855 | 0.503 |
| 16 | 39 | 2 | 0.3737 | 0.0486 | 0.28962 | 0.4823 |
| 17 | 37 | 2 | 0.3535 | 0.048 | 0.27086 | 0.4614 |
| 18 | 35 | 3 | 0.3232 | 0.047 | 0.24307 | 0.4298 |
| 19 | 32 | 3 | 0.2929 | 0.0457 | 0.2157 | 0.3978 |
| 20 | 29 | 1 | 0.2828 | 0.0453 | 0.20668 | 0.387 |
| 24 | 28 | 1 | 0.2727 | 0.0448 | 0.19771 | 0.3762 |
| 27 | 27 | 1 | 0.2626 | 0.0442 | 0.1888 | 0.3653 |
| 28 | 26 | 1 | 0.2525 | 0.0437 | 0.17994 | 0.3544 |
| 29 | 25 | 1 | 0.2424 | 0.0431 | 0.17114 | 0.3434 |
| 30 | 24 | 1 | 0.2323 | 0.0424 | 0.1624 | 0.3324 |
| 31 | 23 | 1 | 0.2222 | 0.0418 | 0.15372 | 0.3212 |
| 32 | 22 | 1 | 0.2121 | 0.0411 | 0.14511 | 0.3101 |
| 33 | 21 | 1 | 0.202 | 0.0404 | 0.13657 | 0.2988 |
| 34 | 20 | 1 | 0.1919 | 0.0396 | 0.12811 | 0.2875 |
| 35 | 19 | 1 | 0.1818 | 0.0388 | 0.11972 | 0.2761 |
| 36 | 18 | 1 | 0.1717 | 0.0379 | 0.11141 | 0.2647 |
| 37 | 17 | 1 | 0.1616 | 0.037 | 0.10319 | 0.2531 |
| 38 | 16 | 1 | 0.1515 | 0.036 | 0.09506 | 0.2415 |
| 39 | 15 | 1 | 0.1414 | 0.035 | 0.08704 | 0.2298 |
| 41 | 14 | 1 | 0.1313 | 0.0339 | 0.07912 | 0.2179 |
| 42 | 13 | 1 | 0.1212 | 0.0328 | 0.07132 | 0.206 |
| 46 | 12 | 1 | 0.1111 | 0.0316 | 0.06365 | 0.194 |
| 47 | 11 | 1 | 0.101 | 0.0303 | 0.05612 | 0.1818 |
| 48 | 10 | 1 | 0.0909 | 0.0289 | 0.04876 | 0.1695 |
| 86 | 9 | 1 | 0.0808 | 0.0274 | 0.04158 | 0.157 |
| 87 | 8 | 1 | 0.0707 | 0.0258 | 0.03462 | 0.1444 |
| 88 | 7 | 1 | 0.0606 | 0.024 | 0.02791 | 0.1316 |
| 89 | 6 | 1 | 0.0505 | 0.022 | 0.0215 | 0.1186 |
| 90 | 5 | 1 | 0.0404 | 0.0198 | 0.01547 | 0.1055 |
| 91 | 4 | 1 | 0.0303 | 0.0172 | 0.00994 | 0.0923 |
| 92 | 3 | 1 | 0.0202 | 0.0141 | 0.00512 | 0.0796 |
| 93 | 2 | 1 | 0.0101 | 0.01 | 0.00144 | 0.071 |
| 96 | 1 | 1 | 0 | NaN | NA | NA |

**Table S41.** Bornova station Kaplan-Meier drought risk estimates according to SPEI-3, 6, and 12

| Drought Risk (SPEI3) | | Drought Risk (SPEI6) | | Drought Risk (SPEI12) | |
| --- | --- | --- | --- | --- | --- |
| Time | Drought Risk | Time | Drought Risk | Time | Drought Risk |
| 1 | 0.0745 | 1 | 0.0825 | 1 | 0.0909 |
| 2 | 0.1064 | 2 | 0.1753 | 2 | 0.1616 |
| 3 | 0.1702 | 3 | 0.268 | 3 | 0.2121 |
| 4 | 0.2553 | 4 | 0.3093 | 4 | 0.2626 |
| 5 | 0.3511 | 5 | 0.3402 | 5 | 0.3131 |
| 6 | 0.4149 | 6 | 0.4021 | 6 | 0.3333 |
| 7 | 0.4894 | 7 | 0.4536 | 7 | 0.3636 |
| 8 | 0.5532 | 8 | 0.5052 | 8 | 0.3939 |
| 9 | 0.5957 | 9 | 0.5464 | 9 | 0.4343 |
| 10 | 0.6489 | 10 | 0.5876 | 10 | 0.4747 |
| 11 | 0.7128 | 11 | 0.6392 | 11 | 0.4949 |
| 12 | 0.734 | 12 | 0.6598 | 12 | 0.5354 |
| 13 | 0.7766 | 13 | 0.6804 | 13 | 0.5657 |
| 14 | 0.7979 | 14 | 0.701 | 14 | 0.5859 |
| 15 | 0.8298 | 15 | 0.732 | 15 | 0.6061 |
| 16 | 0.8617 | 16 | 0.7629 | 16 | 0.6263 |
| 17 | 0.8723 | 17 | 0.7835 | 17 | 0.6465 |
| 18 | 0.8936 | 18 | 0.8041 | 18 | 0.6768 |
| 19 | 0.9043 | 19 | 0.8144 | 19 | 0.7071 |
| 21 | 0.9149 | 20 | 0.8351 | 20 | 0.7172 |
| 25 | 0.9255 | 21 | 0.8557 | 24 | 0.7273 |
| 26 | 0.9468 | 22 | 0.8763 | 27 | 0.7374 |
| 27 | 0.9574 | 26 | 0.8866 | 28 | 0.7475 |
| 30 | 0.9681 | 27 | 0.8969 | 29 | 0.7576 |
| 31 | 0.9787 | 30 | 0.9072 | 30 | 0.7677 |
| 36 | 0.9894 | 39 | 0.9175 | 31 | 0.7778 |
| 37 | 1 | 57 | 0.9278 | 32 | 0.7879 |
|  |  | 58 | 0.9381 | 33 | 0.798 |
|  |  | 59 | 0.9485 | 34 | 0.8081 |
|  |  | 60 | 0.9588 | 35 | 0.8182 |
|  |  | 61 | 0.9691 | 36 | 0.8283 |
|  |  | 62 | 0.9794 | 37 | 0.8384 |
|  |  | 64 | 0.9897 | 38 | 0.8485 |
|  |  | 65 | 1 | 39 | 0.8586 |
|  |  |  |  | 41 | 0.8687 |
|  |  |  |  | 42 | 0.8788 |
|  |  |  |  | 46 | 0.8889 |
|  |  |  |  | 47 | 0.899 |
|  |  |  |  | 48 | 0.9091 |
|  |  |  |  | 86 | 0.9192 |
|  |  |  |  | 87 | 0.9293 |
|  |  |  |  | 88 | 0.9394 |
|  |  |  |  | 89 | 0.9495 |
|  |  |  |  | 90 | 0.9596 |
|  |  |  |  | 91 | 0.9697 |
|  |  |  |  | 92 | 0.9798 |
|  |  |  |  | 93 | 0.9899 |
|  |  |  |  | 96 | 1 |

**Table S42.** Buldan station Kaplan-Meier survival estimates according to SPI-3

| Kaplan-Meier Wet to Dry (SPI3) | | | | | | |
| --- | --- | --- | --- | --- | --- | --- |
|  |  | n | events | median | 0.95LCL | 0.95UCL |
|  |  | 52 | 52 | 8.5 | 7 | 11 |
| time | n.risk | n.event | survival | std.err | lower 95% CL | upper 95% CL |
| 1 | 52 | 3 | 0.9423 | 0.0323 | 0.88102 | 1 |
| 2 | 49 | 2 | 0.9038 | 0.0409 | 0.82717 | 0.988 |
| 3 | 47 | 5 | 0.8077 | 0.0547 | 0.70737 | 0.922 |
| 4 | 42 | 4 | 0.7308 | 0.0615 | 0.61963 | 0.862 |
| 5 | 38 | 2 | 0.6923 | 0.064 | 0.57757 | 0.83 |
| 6 | 36 | 3 | 0.6346 | 0.0668 | 0.51635 | 0.78 |
| 7 | 33 | 4 | 0.5577 | 0.0689 | 0.4378 | 0.71 |
| 8 | 29 | 3 | 0.5 | 0.0693 | 0.381 | 0.656 |
| 9 | 26 | 3 | 0.4423 | 0.0689 | 0.32597 | 0.6 |
| 10 | 23 | 3 | 0.3846 | 0.0675 | 0.27272 | 0.542 |
| 11 | 20 | 5 | 0.2885 | 0.0628 | 0.18823 | 0.442 |
| 12 | 15 | 3 | 0.2308 | 0.0584 | 0.1405 | 0.379 |
| 13 | 12 | 3 | 0.1731 | 0.0525 | 0.09555 | 0.314 |
| 14 | 9 | 2 | 0.1346 | 0.0473 | 0.06758 | 0.268 |
| 15 | 7 | 1 | 0.1154 | 0.0443 | 0.05436 | 0.245 |
| 18 | 6 | 2 | 0.0769 | 0.037 | 0.03 | 0.197 |
| 22 | 4 | 1 | 0.0577 | 0.0323 | 0.01923 | 0.173 |
| 23 | 3 | 1 | 0.0385 | 0.0267 | 0.00988 | 0.15 |
| 25 | 2 | 1 | 0.0192 | 0.019 | 0.00276 | 0.134 |
| 37 | 1 | 1 | 0 | NaN | NA | NA |

**Table S43.** Buldan station Kaplan-Meier survival estimates according to SPI-6

| Kaplan-Meier Wet to Dry (SPI6) | | | | | | |
| --- | --- | --- | --- | --- | --- | --- |
|  |  | n | events | median | 0.95LCL | 0.95UCL |
|  |  | 50 | 50 | 8.5 | 6 | 13 |
| time | n.risk | n.event | survival | std.err | lower 95% CL | upper 95% CL |
| 0 | 50 | 1 | 0.98 | 0.0198 | 0.942 | 1 |
| 1 | 49 | 3 | 0.92 | 0.0384 | 0.8478 | 0.998 |
| 2 | 46 | 6 | 0.8 | 0.0566 | 0.6965 | 0.919 |
| 3 | 40 | 5 | 0.7 | 0.0648 | 0.5838 | 0.839 |
| 4 | 35 | 2 | 0.66 | 0.067 | 0.5409 | 0.805 |
| 5 | 33 | 1 | 0.64 | 0.0679 | 0.5199 | 0.788 |
| 6 | 32 | 1 | 0.62 | 0.0686 | 0.4991 | 0.77 |
| 7 | 31 | 4 | 0.54 | 0.0705 | 0.4181 | 0.697 |
| 8 | 27 | 2 | 0.5 | 0.0707 | 0.379 | 0.66 |
| 9 | 25 | 2 | 0.46 | 0.0705 | 0.3407 | 0.621 |
| 10 | 23 | 2 | 0.42 | 0.0698 | 0.3032 | 0.582 |
| 11 | 21 | 2 | 0.38 | 0.0686 | 0.2667 | 0.541 |
| 12 | 19 | 1 | 0.36 | 0.0679 | 0.2488 | 0.521 |
| 13 | 18 | 2 | 0.32 | 0.066 | 0.2136 | 0.479 |
| 14 | 16 | 2 | 0.28 | 0.0635 | 0.1795 | 0.437 |
| 15 | 14 | 1 | 0.26 | 0.062 | 0.1629 | 0.415 |
| 16 | 13 | 2 | 0.22 | 0.0586 | 0.1305 | 0.371 |
| 17 | 11 | 2 | 0.18 | 0.0543 | 0.0996 | 0.325 |
| 18 | 9 | 2 | 0.14 | 0.0491 | 0.0704 | 0.278 |
| 19 | 7 | 1 | 0.12 | 0.046 | 0.0566 | 0.254 |
| 33 | 6 | 1 | 0.1 | 0.0424 | 0.0435 | 0.23 |
| 34 | 5 | 1 | 0.08 | 0.0384 | 0.0313 | 0.205 |
| 35 | 4 | 1 | 0.06 | 0.0336 | 0.02 | 0.18 |
| 39 | 3 | 1 | 0.04 | 0.0277 | 0.0103 | 0.156 |
| 40 | 2 | 2 | 0 | NaN | NA | NA |

**Table S44.** Buldan station Kaplan-Meier survival estimates according to SPI-12

| Kaplan-Meier Wet to Dry (SPI12) | | | | | | |
| --- | --- | --- | --- | --- | --- | --- |
|  |  | n | events | median | 0.95LCL | 0.95UCL |
|  |  | 63 | 63 | 11 | 9 | 14 |
| time | n.risk | n.event | survival | std.err | lower 95% CL | upper 95% CL |
| 1 | 63 | 3 | 0.9524 | 0.0268 | 0.90122 | 1 |
| 2 | 60 | 2 | 0.9206 | 0.0341 | 0.85625 | 0.99 |
| 3 | 58 | 4 | 0.8571 | 0.0441 | 0.77495 | 0.948 |
| 4 | 54 | 4 | 0.7937 | 0.051 | 0.69976 | 0.9 |
| 5 | 50 | 2 | 0.7619 | 0.0537 | 0.66367 | 0.875 |
| 6 | 48 | 2 | 0.7302 | 0.0559 | 0.62838 | 0.848 |
| 7 | 46 | 3 | 0.6825 | 0.0586 | 0.57675 | 0.808 |
| 8 | 43 | 4 | 0.619 | 0.0612 | 0.51003 | 0.751 |
| 9 | 39 | 3 | 0.5714 | 0.0623 | 0.46141 | 0.708 |
| 10 | 36 | 3 | 0.5238 | 0.0629 | 0.41393 | 0.663 |
| 11 | 33 | 3 | 0.4762 | 0.0629 | 0.36754 | 0.617 |
| 12 | 30 | 3 | 0.4286 | 0.0623 | 0.32225 | 0.57 |
| 13 | 27 | 3 | 0.381 | 0.0612 | 0.27808 | 0.522 |
| 14 | 24 | 3 | 0.3333 | 0.0594 | 0.23508 | 0.473 |
| 15 | 21 | 1 | 0.3175 | 0.0586 | 0.22103 | 0.456 |
| 16 | 20 | 1 | 0.3016 | 0.0578 | 0.20712 | 0.439 |
| 17 | 19 | 1 | 0.2857 | 0.0569 | 0.19336 | 0.422 |
| 18 | 18 | 1 | 0.2698 | 0.0559 | 0.17976 | 0.405 |
| 19 | 17 | 1 | 0.254 | 0.0548 | 0.16633 | 0.388 |
| 30 | 16 | 1 | 0.2381 | 0.0537 | 0.15308 | 0.37 |
| 31 | 15 | 1 | 0.2222 | 0.0524 | 0.14001 | 0.353 |
| 32 | 14 | 1 | 0.2063 | 0.051 | 0.12714 | 0.335 |
| 33 | 13 | 1 | 0.1905 | 0.0495 | 0.11449 | 0.317 |
| 34 | 12 | 1 | 0.1746 | 0.0478 | 0.10207 | 0.299 |
| 35 | 11 | 1 | 0.1587 | 0.046 | 0.0899 | 0.28 |
| 36 | 10 | 1 | 0.1429 | 0.0441 | 0.07802 | 0.262 |
| 37 | 9 | 1 | 0.127 | 0.0419 | 0.06646 | 0.243 |
| 38 | 8 | 1 | 0.1111 | 0.0396 | 0.05526 | 0.223 |
| 39 | 7 | 1 | 0.0952 | 0.037 | 0.04449 | 0.204 |
| 40 | 6 | 1 | 0.0794 | 0.0341 | 0.03423 | 0.184 |
| 47 | 5 | 1 | 0.0635 | 0.0307 | 0.0246 | 0.164 |
| 64 | 4 | 1 | 0.0476 | 0.0268 | 0.01578 | 0.144 |
| 65 | 3 | 1 | 0.0317 | 0.0221 | 0.00812 | 0.124 |
| 87 | 2 | 1 | 0.0159 | 0.0157 | 0.00227 | 0.111 |
| 88 | 1 | 1 | 0 | NaN | NA | NA |

**Table S45.** Buldan station Kaplan-Meier drought risk estimates according to SPI-3, 6, and 12

| Drought Risk (SPI3) | | Drought Risk (SPI6) | | Drought Risk (SPI12) | |
| --- | --- | --- | --- | --- | --- |
| Time | Drought Risk | Time | Drought Risk | Time | Drought Risk |
| 1 | 0.0577 | 0 | 0.02 | 1 | 0.0476 |
| 2 | 0.0962 | 1 | 0.08 | 2 | 0.0794 |
| 3 | 0.1923 | 2 | 0.2 | 3 | 0.1429 |
| 4 | 0.2692 | 3 | 0.3 | 4 | 0.2063 |
| 5 | 0.3077 | 4 | 0.34 | 5 | 0.2381 |
| 6 | 0.3654 | 5 | 0.36 | 6 | 0.2698 |
| 7 | 0.4423 | 6 | 0.38 | 7 | 0.3175 |
| 8 | 0.5 | 7 | 0.46 | 8 | 0.381 |
| 9 | 0.5577 | 8 | 0.5 | 9 | 0.4286 |
| 10 | 0.6154 | 9 | 0.54 | 10 | 0.4762 |
| 11 | 0.7115 | 10 | 0.58 | 11 | 0.5238 |
| 12 | 0.7692 | 11 | 0.62 | 12 | 0.5714 |
| 13 | 0.8269 | 12 | 0.64 | 13 | 0.619 |
| 14 | 0.8654 | 13 | 0.68 | 14 | 0.6667 |
| 15 | 0.8846 | 14 | 0.72 | 15 | 0.6825 |
| 18 | 0.9231 | 15 | 0.74 | 16 | 0.6984 |
| 22 | 0.9423 | 16 | 0.78 | 17 | 0.7143 |
| 23 | 0.9615 | 17 | 0.82 | 18 | 0.7302 |
| 25 | 0.9808 | 18 | 0.86 | 19 | 0.746 |
| 37 | 1 | 19 | 0.88 | 30 | 0.7619 |
|  |  | 33 | 0.9 | 31 | 0.7778 |
|  |  | 34 | 0.92 | 32 | 0.7937 |
|  |  | 35 | 0.94 | 33 | 0.8095 |
|  |  | 39 | 0.96 | 34 | 0.8254 |
|  |  | 40 | 1 | 35 | 0.8413 |
|  |  |  |  | 36 | 0.8571 |
|  |  |  |  | 37 | 0.873 |
|  |  |  |  | 38 | 0.8889 |
|  |  |  |  | 39 | 0.9048 |
|  |  |  |  | 40 | 0.9206 |
|  |  |  |  | 47 | 0.9365 |
|  |  |  |  | 64 | 0.9524 |
|  |  |  |  | 65 | 0.9683 |
|  |  |  |  | 87 | 0.9841 |
|  |  |  |  | 88 | 1 |

**Table S46.** Buldan station Kaplan-Meier survival estimates according to SPEI-3

| Kaplan-Meier Wet to Dry (SPEI3) | | | | | | |
| --- | --- | --- | --- | --- | --- | --- |
|  |  | n | events | median | 0.95LCL | 0.95UCL |
|  |  | 61 | 61 | 8 | 7 | 10 |
| time | n.risk | n.event | survival | std.err | lower 95% CI | upper 95% CI |
| 1 | 61 | 4 | 0.9344 | 0.0317 | 0.87433 | 0.999 |
| 2 | 57 | 4 | 0.8689 | 0.0432 | 0.78814 | 0.958 |
| 3 | 53 | 5 | 0.7869 | 0.0524 | 0.69055 | 0.897 |
| 4 | 48 | 3 | 0.7377 | 0.0563 | 0.63518 | 0.857 |
| 5 | 45 | 3 | 0.6885 | 0.0593 | 0.58159 | 0.815 |
| 6 | 42 | 4 | 0.623 | 0.0621 | 0.51247 | 0.757 |
| 7 | 38 | 6 | 0.5246 | 0.0639 | 0.41311 | 0.666 |
| 8 | 32 | 6 | 0.4262 | 0.0633 | 0.31856 | 0.57 |
| 9 | 26 | 4 | 0.3607 | 0.0615 | 0.25822 | 0.504 |
| 10 | 22 | 4 | 0.2951 | 0.0584 | 0.20021 | 0.435 |
| 11 | 18 | 3 | 0.2459 | 0.0551 | 0.15846 | 0.382 |
| 12 | 15 | 2 | 0.2131 | 0.0524 | 0.13158 | 0.345 |
| 13 | 13 | 3 | 0.1639 | 0.0474 | 0.09301 | 0.289 |
| 14 | 10 | 3 | 0.1148 | 0.0408 | 0.05716 | 0.23 |
| 15 | 7 | 2 | 0.082 | 0.0351 | 0.03539 | 0.19 |
| 16 | 5 | 1 | 0.0656 | 0.0317 | 0.02543 | 0.169 |
| 17 | 4 | 1 | 0.0492 | 0.0277 | 0.01631 | 0.148 |
| 19 | 3 | 1 | 0.0328 | 0.0228 | 0.00839 | 0.128 |
| 22 | 2 | 1 | 0.0164 | 0.0163 | 0.00235 | 0.115 |
| 31 | 1 | 1 | 0 | NaN | NA | NA |

**Table S47.** Buldan station Kaplan-Meier survival estimates according to SPEI-6

| Kaplan-Meier Wet to Dry (SPEI6) | | | | | | |
| --- | --- | --- | --- | --- | --- | --- |
|  |  | n | events | median | 0.95LCL | 0.95UCL |
|  |  | 65 | 65 | 11 | 8 | 14 |
| time | n.risk | n.event | survival | std.err | lower 95% CI | upper 95% CI |
| 1 | 65 | 6 | 0.9077 | 0.0359 | 0.83998 | 0.981 |
| 2 | 59 | 6 | 0.8154 | 0.0481 | 0.72631 | 0.915 |
| 3 | 53 | 5 | 0.7385 | 0.0545 | 0.63899 | 0.853 |
| 4 | 48 | 3 | 0.6923 | 0.0572 | 0.58873 | 0.814 |
| 5 | 45 | 1 | 0.6769 | 0.058 | 0.57227 | 0.801 |
| 6 | 44 | 1 | 0.6615 | 0.0587 | 0.55595 | 0.787 |
| 7 | 43 | 2 | 0.6308 | 0.0599 | 0.52371 | 0.76 |
| 8 | 41 | 2 | 0.6 | 0.0608 | 0.49198 | 0.732 |
| 9 | 39 | 3 | 0.5538 | 0.0617 | 0.44528 | 0.689 |
| 10 | 36 | 3 | 0.5077 | 0.062 | 0.39961 | 0.645 |
| 11 | 33 | 4 | 0.4462 | 0.0617 | 0.34029 | 0.585 |
| 12 | 29 | 3 | 0.4 | 0.0608 | 0.297 | 0.539 |
| 13 | 26 | 2 | 0.3692 | 0.0599 | 0.26872 | 0.507 |
| 14 | 24 | 1 | 0.3538 | 0.0593 | 0.25477 | 0.491 |
| 15 | 23 | 2 | 0.3231 | 0.058 | 0.22724 | 0.459 |
| 16 | 21 | 3 | 0.2769 | 0.0555 | 0.18696 | 0.41 |
| 17 | 18 | 5 | 0.2 | 0.0496 | 0.12299 | 0.325 |
| 18 | 13 | 2 | 0.1692 | 0.0465 | 0.09875 | 0.29 |
| 19 | 11 | 1 | 0.1538 | 0.0448 | 0.08699 | 0.272 |
| 30 | 10 | 1 | 0.1385 | 0.0428 | 0.0755 | 0.254 |
| 37 | 9 | 1 | 0.1231 | 0.0407 | 0.06432 | 0.236 |
| 38 | 8 | 1 | 0.1077 | 0.0384 | 0.05349 | 0.217 |
| 39 | 7 | 1 | 0.0923 | 0.0359 | 0.04307 | 0.198 |
| 40 | 6 | 1 | 0.0769 | 0.0331 | 0.03314 | 0.179 |
| 41 | 5 | 1 | 0.0615 | 0.0298 | 0.02381 | 0.159 |
| 42 | 4 | 1 | 0.0462 | 0.026 | 0.01528 | 0.139 |
| 43 | 3 | 1 | 0.0308 | 0.0214 | 0.00786 | 0.12 |
| 44 | 2 | 1 | 0.0154 | 0.0153 | 0.0022 | 0.108 |
| 64 | 1 | 1 | 0 | NaN | NA | NA |

**Table S48.** Buldan station Kaplan-Meier survival estimates according to SPEI-12

| Kaplan-Meier Wet to Dry (SPEI12) | | | | | | |
| --- | --- | --- | --- | --- | --- | --- |
|  |  | n | events | median | 0.95LCL | 0.95UCL |
|  |  | 69 | 69 | 8 | 7 | 11 |
| time | n.risk | n.event | survival | std.err | lower 95% CI | upper 95% CI |
| 1 | 69 | 5 | 0.9275 | 0.0312 | 0.86834 | 0.991 |
| 2 | 64 | 5 | 0.8551 | 0.0424 | 0.77592 | 0.942 |
| 3 | 59 | 5 | 0.7826 | 0.0497 | 0.69109 | 0.886 |
| 4 | 54 | 4 | 0.7246 | 0.0538 | 0.62655 | 0.838 |
| 5 | 50 | 4 | 0.6667 | 0.0568 | 0.56422 | 0.788 |
| 6 | 46 | 4 | 0.6087 | 0.0588 | 0.50378 | 0.735 |
| 7 | 42 | 4 | 0.5507 | 0.0599 | 0.44502 | 0.682 |
| 8 | 38 | 4 | 0.4928 | 0.0602 | 0.38785 | 0.626 |
| 9 | 34 | 3 | 0.4493 | 0.0599 | 0.34599 | 0.583 |
| 10 | 31 | 3 | 0.4058 | 0.0591 | 0.30501 | 0.54 |
| 11 | 28 | 3 | 0.3623 | 0.0579 | 0.26494 | 0.495 |
| 12 | 25 | 3 | 0.3188 | 0.0561 | 0.22584 | 0.45 |
| 13 | 22 | 4 | 0.2609 | 0.0529 | 0.17536 | 0.388 |
| 14 | 18 | 4 | 0.2029 | 0.0484 | 0.12711 | 0.324 |
| 15 | 14 | 1 | 0.1884 | 0.0471 | 0.11545 | 0.307 |
| 16 | 13 | 1 | 0.1739 | 0.0456 | 0.10399 | 0.291 |
| 17 | 12 | 1 | 0.1594 | 0.0441 | 0.09273 | 0.274 |
| 31 | 11 | 1 | 0.1449 | 0.0424 | 0.0817 | 0.257 |
| 38 | 10 | 1 | 0.1304 | 0.0405 | 0.07093 | 0.24 |
| 39 | 9 | 1 | 0.1159 | 0.0385 | 0.06043 | 0.222 |
| 40 | 8 | 1 | 0.1014 | 0.0363 | 0.05027 | 0.205 |
| 41 | 7 | 1 | 0.087 | 0.0339 | 0.04048 | 0.187 |
| 42 | 6 | 1 | 0.0725 | 0.0312 | 0.03115 | 0.169 |
| 43 | 5 | 1 | 0.058 | 0.0281 | 0.02239 | 0.15 |
| 44 | 4 | 1 | 0.0435 | 0.0246 | 0.01438 | 0.131 |
| 45 | 3 | 1 | 0.029 | 0.0202 | 0.0074 | 0.114 |
| 64 | 2 | 1 | 0.0145 | 0.0144 | 0.00207 | 0.101 |
| 87 | 1 | 1 | 0 | NaN | NA | NA |

**Table S49.** Buldan station Kaplan-Meier drought risk estimates according to SPEI-3, 6, and 12

| Drought Risk (SPEI3) | | Drought Risk (SPEI6) | | Drought Risk (SPEI12) | |
| --- | --- | --- | --- | --- | --- |
| Time | Drought Risk | Time | Drought Risk | Time | Drought Risk |
| 1 | 0.0656 | 1 | 0.0923 | 1 | 0.0725 |
| 2 | 0.1311 | 2 | 0.1846 | 2 | 0.1449 |
| 3 | 0.2131 | 3 | 0.2615 | 3 | 0.2174 |
| 4 | 0.2623 | 4 | 0.3077 | 4 | 0.2754 |
| 5 | 0.3115 | 5 | 0.3231 | 5 | 0.3333 |
| 6 | 0.377 | 6 | 0.3385 | 6 | 0.3913 |
| 7 | 0.4754 | 7 | 0.3692 | 7 | 0.4493 |
| 8 | 0.5738 | 8 | 0.4 | 8 | 0.5072 |
| 9 | 0.6393 | 9 | 0.4462 | 9 | 0.5507 |
| 10 | 0.7049 | 10 | 0.4923 | 10 | 0.5942 |
| 11 | 0.7541 | 11 | 0.5538 | 11 | 0.6377 |
| 12 | 0.7869 | 12 | 0.6 | 12 | 0.6812 |
| 13 | 0.8361 | 13 | 0.6308 | 13 | 0.7391 |
| 14 | 0.8852 | 14 | 0.6462 | 14 | 0.7971 |
| 15 | 0.918 | 15 | 0.6769 | 15 | 0.8116 |
| 16 | 0.9344 | 16 | 0.7231 | 16 | 0.8261 |
| 17 | 0.9508 | 17 | 0.8 | 17 | 0.8406 |
| 19 | 0.9672 | 18 | 0.8308 | 31 | 0.8551 |
| 22 | 0.9836 | 19 | 0.8462 | 38 | 0.8696 |
| 31 | 1 | 30 | 0.8615 | 39 | 0.8841 |
|  |  | 37 | 0.8769 | 40 | 0.8986 |
|  |  | 38 | 0.8923 | 41 | 0.913 |
|  |  | 39 | 0.9077 | 42 | 0.9275 |
|  |  | 40 | 0.9231 | 43 | 0.942 |
|  |  | 41 | 0.9385 | 44 | 0.9565 |
|  |  | 42 | 0.9538 | 45 | 0.971 |
|  |  | 43 | 0.9692 | 64 | 0.9855 |
|  |  | 44 | 0.9846 | 87 | 1 |
|  |  | 64 | 1 |  |  |

**Table S50.** Demirci station Kaplan-Meier survival estimates according to SPI-3

| Kaplan-Meier Wet to Dry (SPI3) | | | | | | | |
| --- | --- | --- | --- | --- | --- | --- | --- |
|  |  | n | events | median | 0.95LCL | 0.95UCL |
|  |  | 118 | 118 | 9.5 | 8 | 12 |
| time | n.risk | n.event | survival | std.err | lower 95% CL | upper 95% CL |
| 1 | 118 | 3 | 0.97458 | 0.01449 | 0.94659 | 1 |
| 2 | 115 | 4 | 0.94068 | 0.02175 | 0.89901 | 0.9843 |
| 3 | 111 | 10 | 0.85593 | 0.03233 | 0.79486 | 0.9217 |
| 4 | 101 | 12 | 0.75424 | 0.03963 | 0.68042 | 0.8361 |
| 5 | 89 | 9 | 0.67797 | 0.04301 | 0.59869 | 0.7677 |
| 6 | 80 | 6 | 0.62712 | 0.04452 | 0.54567 | 0.7207 |
| 7 | 74 | 4 | 0.59322 | 0.04522 | 0.51089 | 0.6888 |
| 8 | 70 | 7 | 0.5339 | 0.04592 | 0.45107 | 0.6319 |
| 9 | 63 | 4 | 0.5 | 0.04603 | 0.41746 | 0.5989 |
| 10 | 59 | 4 | 0.4661 | 0.04592 | 0.38425 | 0.5654 |
| 11 | 55 | 4 | 0.4322 | 0.0456 | 0.35146 | 0.5315 |
| 12 | 51 | 5 | 0.38983 | 0.0449 | 0.31106 | 0.4886 |
| 13 | 46 | 4 | 0.35593 | 0.04408 | 0.27923 | 0.4537 |
| 14 | 42 | 4 | 0.32203 | 0.04301 | 0.24786 | 0.4184 |
| 15 | 38 | 5 | 0.27966 | 0.04132 | 0.20935 | 0.3736 |
| 16 | 33 | 3 | 0.25424 | 0.04008 | 0.18665 | 0.3463 |
| 17 | 30 | 4 | 0.22034 | 0.03816 | 0.15692 | 0.3094 |
| 18 | 26 | 4 | 0.18644 | 0.03585 | 0.12789 | 0.2718 |
| 19 | 22 | 3 | 0.16102 | 0.03384 | 0.10666 | 0.2431 |
| 20 | 19 | 4 | 0.12712 | 0.03066 | 0.07923 | 0.204 |
| 21 | 15 | 2 | 0.11017 | 0.02882 | 0.06597 | 0.184 |
| 23 | 13 | 1 | 0.10169 | 0.02782 | 0.05949 | 0.1739 |
| 24 | 12 | 2 | 0.08475 | 0.02564 | 0.04684 | 0.1533 |
| 25 | 10 | 1 | 0.07627 | 0.02443 | 0.04071 | 0.1429 |
| 26 | 9 | 1 | 0.0678 | 0.02314 | 0.03473 | 0.1324 |
| 27 | 8 | 2 | 0.05085 | 0.02022 | 0.02332 | 0.1109 |
| 28 | 6 | 1 | 0.04237 | 0.01854 | 0.01797 | 0.0999 |
| 32 | 5 | 2 | 0.02542 | 0.01449 | 0.00832 | 0.0777 |
| 33 | 3 | 1 | 0.01695 | 0.01188 | 0.00429 | 0.067 |
| 34 | 2 | 1 | 0.00847 | 0.00844 | 0.0012 | 0.0597 |
| 36 | 1 | 1 | 0 | NaN | NA | NA |

**Table S51.** Demirci station Kaplan-Meier survival estimates according to SPI-6

| Kaplan-Meier Wet to Dry (SPI6) | | | | | | |
| --- | --- | --- | --- | --- | --- | --- |
|  |  | n | events | median | 0.95LCL | 0.95UCL |
|  |  | 107 | 107 | 13 | 11 | 16 |
| time | n.risk | n.event | survival | std.err | lower 95% CL | upper 95% CL |
| 1 | 107 | 3 | 0.97196 | 0.016 | 0.94118 | 1 |
| 2 | 104 | 6 | 0.91589 | 0.0268 | 0.86478 | 0.97 |
| 3 | 98 | 5 | 0.86916 | 0.0326 | 0.80755 | 0.9355 |
| 4 | 93 | 4 | 0.83178 | 0.0362 | 0.76383 | 0.9058 |
| 6 | 89 | 2 | 0.81308 | 0.0377 | 0.74247 | 0.8904 |
| 7 | 87 | 7 | 0.74766 | 0.042 | 0.66973 | 0.8347 |
| 8 | 80 | 5 | 0.70093 | 0.0443 | 0.61934 | 0.7933 |
| 9 | 75 | 7 | 0.63551 | 0.0465 | 0.55056 | 0.7336 |
| 10 | 68 | 4 | 0.59813 | 0.0474 | 0.51209 | 0.6986 |
| 11 | 64 | 4 | 0.56075 | 0.048 | 0.47417 | 0.6631 |
| 12 | 60 | 4 | 0.52336 | 0.0483 | 0.43679 | 0.6271 |
| 13 | 56 | 4 | 0.48598 | 0.0483 | 0.39994 | 0.5905 |
| 14 | 52 | 3 | 0.45794 | 0.0482 | 0.37264 | 0.5628 |
| 15 | 49 | 4 | 0.42056 | 0.0477 | 0.3367 | 0.5253 |
| 16 | 45 | 3 | 0.39252 | 0.0472 | 0.3101 | 0.4969 |
| 17 | 42 | 4 | 0.35514 | 0.0463 | 0.27512 | 0.4584 |
| 18 | 38 | 5 | 0.30841 | 0.0446 | 0.23222 | 0.4096 |
| 19 | 33 | 4 | 0.27103 | 0.043 | 0.19864 | 0.3698 |
| 20 | 29 | 2 | 0.25234 | 0.042 | 0.18211 | 0.3496 |
| 21 | 27 | 1 | 0.24299 | 0.0415 | 0.17392 | 0.3395 |
| 23 | 26 | 3 | 0.21495 | 0.0397 | 0.14965 | 0.3087 |
| 24 | 23 | 2 | 0.19626 | 0.0384 | 0.13376 | 0.288 |
| 25 | 21 | 3 | 0.16822 | 0.0362 | 0.11039 | 0.2564 |
| 26 | 18 | 2 | 0.14953 | 0.0345 | 0.09517 | 0.235 |
| 27 | 16 | 2 | 0.13084 | 0.0326 | 0.08029 | 0.2132 |
| 28 | 14 | 3 | 0.1028 | 0.0294 | 0.05874 | 0.1799 |
| 29 | 11 | 3 | 0.07477 | 0.0254 | 0.03839 | 0.1456 |
| 30 | 8 | 2 | 0.05607 | 0.0222 | 0.02577 | 0.122 |
| 31 | 6 | 1 | 0.04673 | 0.0204 | 0.01986 | 0.11 |
| 36 | 5 | 1 | 0.03738 | 0.0183 | 0.01429 | 0.0978 |
| 37 | 4 | 1 | 0.02804 | 0.016 | 0.00919 | 0.0856 |
| 42 | 3 | 1 | 0.01869 | 0.0131 | 0.00474 | 0.0738 |
| 44 | 2 | 1 | 0.00935 | 0.0093 | 0.00133 | 0.0657 |
| 94 | 1 | 1 | 0 | NaN | NA | NA |

**Table S52.** Demirci station Kaplan-Meier survival estimates according to SPI-12

| Kaplan-Meier Wet to Dry (SPI12) | | | | | | |
| --- | --- | --- | --- | --- | --- | --- |
|  |  | n | events | median | 0.95LCL | 0.95UCL |
|  |  | 107 | 107 | 18 | 16 | 22 |
| time | n.risk | n.event | survival | std.err | lower 95% CL | upper 95% CL |
| 1 | 107 | 2 | 0.98131 | 0.0131 | 0.95598 | 1 |
| 2 | 105 | 3 | 0.95327 | 0.0204 | 0.91411 | 0.9941 |
| 3 | 102 | 3 | 0.92523 | 0.0254 | 0.87672 | 0.9764 |
| 4 | 99 | 4 | 0.88785 | 0.0305 | 0.83003 | 0.9497 |
| 5 | 95 | 2 | 0.86916 | 0.0326 | 0.80755 | 0.9355 |
| 6 | 93 | 2 | 0.85047 | 0.0345 | 0.78551 | 0.9208 |
| 7 | 91 | 2 | 0.83178 | 0.0362 | 0.76383 | 0.9058 |
| 8 | 89 | 4 | 0.79439 | 0.0391 | 0.72139 | 0.8748 |
| 9 | 85 | 3 | 0.76636 | 0.0409 | 0.69023 | 0.8509 |
| 10 | 82 | 2 | 0.74766 | 0.042 | 0.66973 | 0.8347 |
| 11 | 80 | 1 | 0.73832 | 0.0425 | 0.65956 | 0.8265 |
| 12 | 79 | 3 | 0.71028 | 0.0439 | 0.62932 | 0.8017 |
| 13 | 76 | 4 | 0.6729 | 0.0454 | 0.58962 | 0.7679 |
| 14 | 72 | 5 | 0.62617 | 0.0468 | 0.54089 | 0.7249 |
| 15 | 67 | 4 | 0.58879 | 0.0476 | 0.50256 | 0.6898 |
| 16 | 63 | 4 | 0.5514 | 0.0481 | 0.46478 | 0.6542 |
| 17 | 59 | 5 | 0.50467 | 0.0483 | 0.4183 | 0.6089 |
| 18 | 54 | 4 | 0.46729 | 0.0482 | 0.3817 | 0.5721 |
| 19 | 50 | 3 | 0.43925 | 0.048 | 0.3546 | 0.5441 |
| 20 | 47 | 2 | 0.42056 | 0.0477 | 0.3367 | 0.5253 |
| 21 | 45 | 2 | 0.40187 | 0.0474 | 0.31893 | 0.5064 |
| 22 | 43 | 2 | 0.38318 | 0.047 | 0.3013 | 0.4873 |
| 23 | 41 | 2 | 0.36449 | 0.0465 | 0.28381 | 0.4681 |
| 24 | 39 | 2 | 0.34579 | 0.046 | 0.26646 | 0.4487 |
| 25 | 37 | 2 | 0.3271 | 0.0454 | 0.24926 | 0.4292 |
| 26 | 35 | 1 | 0.31776 | 0.045 | 0.24072 | 0.4194 |
| 27 | 34 | 1 | 0.30841 | 0.0446 | 0.23222 | 0.4096 |
| 28 | 33 | 1 | 0.29907 | 0.0443 | 0.22376 | 0.3997 |
| 29 | 32 | 1 | 0.28972 | 0.0439 | 0.21534 | 0.3898 |
| 30 | 31 | 2 | 0.27103 | 0.043 | 0.19864 | 0.3698 |
| 31 | 29 | 1 | 0.26168 | 0.0425 | 0.19035 | 0.3597 |
| 32 | 28 | 1 | 0.25234 | 0.042 | 0.18211 | 0.3496 |
| 33 | 27 | 1 | 0.24299 | 0.0415 | 0.17392 | 0.3395 |
| 34 | 26 | 2 | 0.2243 | 0.0403 | 0.15769 | 0.319 |
| 35 | 24 | 3 | 0.19626 | 0.0384 | 0.13376 | 0.288 |
| 36 | 21 | 1 | 0.18692 | 0.0377 | 0.1259 | 0.2775 |
| 37 | 20 | 1 | 0.17757 | 0.0369 | 0.11811 | 0.267 |
| 38 | 19 | 1 | 0.16822 | 0.0362 | 0.11039 | 0.2564 |
| 39 | 18 | 1 | 0.15888 | 0.0353 | 0.10274 | 0.2457 |
| 40 | 17 | 1 | 0.14953 | 0.0345 | 0.09517 | 0.235 |
| 41 | 16 | 1 | 0.14019 | 0.0336 | 0.08768 | 0.2241 |
| 42 | 15 | 1 | 0.13084 | 0.0326 | 0.08029 | 0.2132 |
| 43 | 14 | 1 | 0.1215 | 0.0316 | 0.07299 | 0.2022 |
| 44 | 13 | 1 | 0.11215 | 0.0305 | 0.06581 | 0.1911 |
| 45 | 12 | 1 | 0.1028 | 0.0294 | 0.05874 | 0.1799 |
| 46 | 11 | 1 | 0.09346 | 0.0281 | 0.0518 | 0.1686 |
| 47 | 10 | 1 | 0.08411 | 0.0268 | 0.04501 | 0.1572 |
| 48 | 9 | 1 | 0.07477 | 0.0254 | 0.03839 | 0.1456 |
| 49 | 8 | 2 | 0.05607 | 0.0222 | 0.02577 | 0.122 |
| 50 | 6 | 1 | 0.04673 | 0.0204 | 0.01986 | 0.11 |
| 97 | 5 | 1 | 0.03738 | 0.0183 | 0.01429 | 0.0978 |
| 98 | 4 | 1 | 0.02804 | 0.016 | 0.00919 | 0.0856 |
| 99 | 3 | 1 | 0.01869 | 0.0131 | 0.00474 | 0.0738 |
| 130 | 2 | 1 | 0.00935 | 0.0093 | 0.00133 | 0.0657 |
| 131 | 1 | 1 | 0 | NaN | NA | NA |

**Table S53.** Demirci station Kaplan-Meier drought risk estimates according to SPI-3, 6, and 12

| Drought Risk (SPI3) | | Drought Risk (SPI6) | | Drought Risk (SPI12) | |
| --- | --- | --- | --- | --- | --- |
| Time | Drought Risk | Time | Drought Risk | Time | Drought Risk |
| 1 | 0.02542 | 1 | 0.02804 | 1 | 0.01869 |
| 2 | 0.05932 | 2 | 0.08411 | 2 | 0.04673 |
| 3 | 0.14407 | 3 | 0.13084 | 3 | 0.07477 |
| 4 | 0.24576 | 4 | 0.16822 | 4 | 0.11215 |
| 5 | 0.32203 | 6 | 0.18692 | 5 | 0.13084 |
| 6 | 0.37288 | 7 | 0.25234 | 6 | 0.14953 |
| 7 | 0.40678 | 8 | 0.29907 | 7 | 0.16822 |
| 8 | 0.4661 | 9 | 0.36449 | 8 | 0.20561 |
| 9 | 0.5 | 10 | 0.40187 | 9 | 0.23364 |
| 10 | 0.5339 | 11 | 0.43925 | 10 | 0.25234 |
| 11 | 0.5678 | 12 | 0.47664 | 11 | 0.26168 |
| 12 | 0.61017 | 13 | 0.51402 | 12 | 0.28972 |
| 13 | 0.64407 | 14 | 0.54206 | 13 | 0.3271 |
| 14 | 0.67797 | 15 | 0.57944 | 14 | 0.37383 |
| 15 | 0.72034 | 16 | 0.60748 | 15 | 0.41121 |
| 16 | 0.74576 | 17 | 0.64486 | 16 | 0.4486 |
| 17 | 0.77966 | 18 | 0.69159 | 17 | 0.49533 |
| 18 | 0.81356 | 19 | 0.72897 | 18 | 0.53271 |
| 19 | 0.83898 | 20 | 0.74766 | 19 | 0.56075 |
| 20 | 0.87288 | 21 | 0.75701 | 20 | 0.57944 |
| 21 | 0.88983 | 23 | 0.78505 | 21 | 0.59813 |
| 23 | 0.89831 | 24 | 0.80374 | 22 | 0.61682 |
| 24 | 0.91525 | 25 | 0.83178 | 23 | 0.63551 |
| 25 | 0.92373 | 26 | 0.85047 | 24 | 0.65421 |
| 26 | 0.9322 | 27 | 0.86916 | 25 | 0.6729 |
| 27 | 0.94915 | 28 | 0.8972 | 26 | 0.68224 |
| 28 | 0.95763 | 29 | 0.92523 | 27 | 0.69159 |
| 32 | 0.97458 | 30 | 0.94393 | 28 | 0.70093 |
| 33 | 0.98305 | 31 | 0.95327 | 29 | 0.71028 |
| 34 | 0.99153 | 36 | 0.96262 | 30 | 0.72897 |
| 36 | 1 | 37 | 0.97196 | 31 | 0.73832 |
|  |  | 42 | 0.98131 | 32 | 0.74766 |
|  |  | 44 | 0.99065 | 33 | 0.75701 |
|  |  | 94 | 1 | 34 | 0.7757 |
|  |  |  |  | 35 | 0.80374 |
|  |  |  |  | 36 | 0.81308 |
|  |  |  |  | 37 | 0.82243 |
|  |  |  |  | 38 | 0.83178 |
|  |  |  |  | 39 | 0.84112 |
|  |  |  |  | 40 | 0.85047 |
|  |  |  |  | 41 | 0.85981 |
|  |  |  |  | 42 | 0.86916 |
|  |  |  |  | 43 | 0.8785 |
|  |  |  |  | 44 | 0.88785 |
|  |  |  |  | 45 | 0.8972 |
|  |  |  |  | 46 | 0.90654 |
|  |  |  |  | 47 | 0.91589 |
|  |  |  |  | 48 | 0.92523 |
|  |  |  |  | 49 | 0.94393 |
|  |  |  |  | 50 | 0.95327 |
|  |  |  |  | 97 | 0.96262 |
|  |  |  |  | 98 | 0.97196 |
|  |  |  |  | 99 | 0.98131 |
|  |  |  |  | 130 | 0.99065 |
|  |  |  |  | 131 | 1 |

**Table S54.** Demirci station Kaplan-Meier survival estimates according to SPEI-3

| Kaplan-Meier Wet to Dry (SPEI3) | | | | | | |
| --- | --- | --- | --- | --- | --- | --- |
|  |  | n | events | median | 0.95LCL | 0.95UCL |
|  |  | 133 | 133 | 9 | 8 | 11 |
| time | n.risk | n.event | survival | std.err | lower 95% CI | upper 95% CI |
| 1 | 133 | 4 | 0.96992 | 0.01481 | 0.94133 | 0.9994 |
| 2 | 129 | 2 | 0.95489 | 0.018 | 0.92026 | 0.9908 |
| 3 | 127 | 9 | 0.88722 | 0.02743 | 0.83505 | 0.9426 |
| 4 | 118 | 13 | 0.78947 | 0.03535 | 0.72314 | 0.8619 |
| 5 | 105 | 9 | 0.7218 | 0.03886 | 0.64953 | 0.8021 |
| 6 | 96 | 10 | 0.64662 | 0.04145 | 0.57027 | 0.7332 |
| 7 | 86 | 8 | 0.58647 | 0.0427 | 0.50847 | 0.6764 |
| 8 | 78 | 8 | 0.52632 | 0.0433 | 0.44795 | 0.6184 |
| 9 | 70 | 6 | 0.4812 | 0.04332 | 0.40336 | 0.5741 |
| 10 | 64 | 5 | 0.44361 | 0.04308 | 0.36672 | 0.5366 |
| 11 | 59 | 5 | 0.40602 | 0.04258 | 0.33057 | 0.4987 |
| 12 | 54 | 3 | 0.38346 | 0.04216 | 0.30912 | 0.4757 |
| 13 | 51 | 4 | 0.35338 | 0.04145 | 0.28081 | 0.4447 |
| 14 | 47 | 4 | 0.32331 | 0.04056 | 0.25283 | 0.4134 |
| 15 | 43 | 5 | 0.28571 | 0.03917 | 0.21839 | 0.3738 |
| 16 | 38 | 3 | 0.26316 | 0.03818 | 0.19802 | 0.3497 |
| 17 | 35 | 3 | 0.2406 | 0.03706 | 0.1779 | 0.3254 |
| 18 | 32 | 2 | 0.22556 | 0.03624 | 0.16463 | 0.3091 |
| 19 | 30 | 4 | 0.19549 | 0.03439 | 0.13848 | 0.276 |
| 20 | 26 | 3 | 0.17293 | 0.03279 | 0.11925 | 0.2508 |
| 21 | 23 | 2 | 0.15789 | 0.03162 | 0.10664 | 0.2338 |
| 22 | 21 | 1 | 0.15038 | 0.03099 | 0.1004 | 0.2252 |
| 23 | 20 | 1 | 0.14286 | 0.03034 | 0.09421 | 0.2166 |
| 24 | 19 | 2 | 0.12782 | 0.02895 | 0.082 | 0.1993 |
| 25 | 17 | 3 | 0.10526 | 0.02661 | 0.06413 | 0.1728 |
| 26 | 14 | 3 | 0.08271 | 0.02388 | 0.04696 | 0.1457 |
| 27 | 11 | 3 | 0.06015 | 0.02062 | 0.03072 | 0.1178 |
| 28 | 8 | 2 | 0.04511 | 0.018 | 0.02064 | 0.0986 |
| 29 | 6 | 1 | 0.03759 | 0.01649 | 0.01591 | 0.0888 |
| 30 | 5 | 1 | 0.03008 | 0.01481 | 0.01146 | 0.079 |
| 31 | 4 | 2 | 0.01504 | 0.01055 | 0.0038 | 0.0595 |
| 32 | 2 | 1 | 0.00752 | 0.00749 | 0.00107 | 0.053 |
| 76 | 1 | 1 | 0 | NaN | NA | NA |

**Table S55.** Demirci station Kaplan-Meier survival estimates according to SPEI-6

| Kaplan-Meier Wet to Dry (SPEI6) | | | | | | |
| --- | --- | --- | --- | --- | --- | --- |
|  |  | n | events | median | 0.95LCL | 0.95UCL |
|  |  | 116 | 116 | 13 | 11 | 16 |
| time | n.risk | n.event | survival | std.err | lower 95% CI | upper 95% CI |
| 1 | 116 | 3 | 0.97414 | 0.01474 | 0.94568 | 1 |
| 2 | 113 | 5 | 0.93103 | 0.02353 | 0.88605 | 0.9783 |
| 3 | 108 | 3 | 0.90517 | 0.0272 | 0.8534 | 0.9601 |
| 4 | 105 | 3 | 0.87931 | 0.03025 | 0.82198 | 0.9406 |
| 5 | 102 | 3 | 0.85345 | 0.03284 | 0.79146 | 0.9203 |
| 6 | 99 | 7 | 0.7931 | 0.03761 | 0.72271 | 0.8704 |
| 7 | 92 | 8 | 0.72414 | 0.0415 | 0.6472 | 0.8102 |
| 8 | 84 | 6 | 0.67241 | 0.04358 | 0.59221 | 0.7635 |
| 9 | 78 | 4 | 0.63793 | 0.04462 | 0.5562 | 0.7317 |
| 10 | 74 | 6 | 0.58621 | 0.04573 | 0.5031 | 0.683 |
| 11 | 68 | 4 | 0.55172 | 0.04617 | 0.46826 | 0.6501 |
| 12 | 64 | 4 | 0.51724 | 0.0464 | 0.43385 | 0.6167 |
| 13 | 60 | 4 | 0.48276 | 0.0464 | 0.39987 | 0.5828 |
| 14 | 56 | 3 | 0.4569 | 0.04625 | 0.37467 | 0.5572 |
| 15 | 53 | 4 | 0.42241 | 0.04586 | 0.34145 | 0.5226 |
| 16 | 49 | 6 | 0.37069 | 0.04484 | 0.29244 | 0.4699 |
| 17 | 43 | 6 | 0.31897 | 0.04327 | 0.24449 | 0.4161 |
| 18 | 37 | 4 | 0.28448 | 0.04189 | 0.21317 | 0.3797 |
| 19 | 33 | 3 | 0.25862 | 0.04066 | 0.19004 | 0.3519 |
| 20 | 30 | 3 | 0.23276 | 0.03924 | 0.16727 | 0.3239 |
| 21 | 27 | 3 | 0.2069 | 0.03761 | 0.14488 | 0.2955 |
| 22 | 24 | 2 | 0.18966 | 0.0364 | 0.1302 | 0.2763 |
| 23 | 22 | 1 | 0.18103 | 0.03575 | 0.12293 | 0.2666 |
| 24 | 21 | 2 | 0.16379 | 0.03436 | 0.10857 | 0.2471 |
| 25 | 19 | 1 | 0.15517 | 0.03362 | 0.10149 | 0.2373 |
| 26 | 18 | 1 | 0.14655 | 0.03284 | 0.09446 | 0.2274 |
| 27 | 17 | 1 | 0.13793 | 0.03202 | 0.08751 | 0.2174 |
| 28 | 16 | 2 | 0.12069 | 0.03025 | 0.07385 | 0.1972 |
| 29 | 14 | 3 | 0.09483 | 0.0272 | 0.05405 | 0.1664 |
| 30 | 11 | 2 | 0.07759 | 0.02484 | 0.04143 | 0.1453 |
| 31 | 9 | 1 | 0.06897 | 0.02353 | 0.03534 | 0.1346 |
| 32 | 8 | 1 | 0.06034 | 0.02211 | 0.02943 | 0.1237 |
| 37 | 7 | 1 | 0.05172 | 0.02056 | 0.02373 | 0.1127 |
| 38 | 6 | 1 | 0.0431 | 0.01886 | 0.01829 | 0.1016 |
| 42 | 5 | 1 | 0.03448 | 0.01694 | 0.01316 | 0.0903 |
| 43 | 4 | 1 | 0.02586 | 0.01474 | 0.00846 | 0.079 |
| 44 | 3 | 1 | 0.01724 | 0.01209 | 0.00436 | 0.0681 |
| 45 | 2 | 1 | 0.00862 | 0.00858 | 0.00122 | 0.0607 |
| 103 | 1 | 1 | 0 | NaN | NA | NA |

**Table S56.** Demirci station Kaplan-Meier survival estimates according to SPEI-12

| Kaplan-Meier Wet to Dry (SPEI12) | | | | | | |
| --- | --- | --- | --- | --- | --- | --- |
|  |  | n | events | median | 0.95LCL | 0.95UCL |
|  |  | 119 | 119 | 24 | 18 | 28 |
| time | n.risk | n.event | survival | std.err | lower 95% CI | upper 95% CI |
| 1 | 119 | 2 | 0.9832 | 0.01178 | 0.96037 | 1 |
| 2 | 117 | 3 | 0.958 | 0.01839 | 0.92261 | 0.9947 |
| 3 | 114 | 3 | 0.9328 | 0.02296 | 0.88885 | 0.9789 |
| 4 | 111 | 4 | 0.8992 | 0.0276 | 0.84665 | 0.9549 |
| 5 | 107 | 3 | 0.8739 | 0.03043 | 0.81631 | 0.9357 |
| 6 | 104 | 5 | 0.8319 | 0.03428 | 0.76739 | 0.9019 |
| 7 | 99 | 4 | 0.7983 | 0.03678 | 0.72939 | 0.8738 |
| 8 | 95 | 4 | 0.7647 | 0.03888 | 0.69217 | 0.8448 |
| 9 | 91 | 2 | 0.7479 | 0.0398 | 0.67381 | 0.8301 |
| 10 | 89 | 2 | 0.7311 | 0.04065 | 0.65562 | 0.8153 |
| 11 | 87 | 1 | 0.7227 | 0.04104 | 0.64657 | 0.8078 |
| 12 | 86 | 2 | 0.7059 | 0.04177 | 0.62859 | 0.7927 |
| 13 | 84 | 3 | 0.6807 | 0.04274 | 0.60186 | 0.7698 |
| 14 | 81 | 3 | 0.6555 | 0.04356 | 0.57541 | 0.7467 |
| 15 | 78 | 4 | 0.6218 | 0.04445 | 0.54055 | 0.7154 |
| 16 | 74 | 2 | 0.605 | 0.04481 | 0.52329 | 0.6996 |
| 17 | 72 | 2 | 0.5882 | 0.04512 | 0.50614 | 0.6837 |
| 18 | 70 | 2 | 0.5714 | 0.04536 | 0.48909 | 0.6676 |
| 19 | 68 | 1 | 0.563 | 0.04547 | 0.4806 | 0.6596 |
| 20 | 67 | 1 | 0.5546 | 0.04556 | 0.47214 | 0.6515 |
| 21 | 66 | 2 | 0.5378 | 0.0457 | 0.4553 | 0.6353 |
| 22 | 64 | 1 | 0.5294 | 0.04576 | 0.44692 | 0.6271 |
| 23 | 63 | 2 | 0.5126 | 0.04582 | 0.43023 | 0.6108 |
| 24 | 61 | 3 | 0.4874 | 0.04582 | 0.40538 | 0.586 |
| 25 | 58 | 3 | 0.4622 | 0.0457 | 0.38075 | 0.561 |
| 26 | 55 | 3 | 0.437 | 0.04547 | 0.35636 | 0.5358 |
| 27 | 52 | 2 | 0.4202 | 0.04525 | 0.34022 | 0.5189 |
| 28 | 50 | 4 | 0.3866 | 0.04464 | 0.30826 | 0.4847 |
| 29 | 46 | 3 | 0.3613 | 0.04404 | 0.28457 | 0.4588 |
| 30 | 43 | 2 | 0.3445 | 0.04356 | 0.26891 | 0.4414 |
| 31 | 41 | 2 | 0.3277 | 0.04303 | 0.25337 | 0.4239 |
| 32 | 39 | 2 | 0.3109 | 0.04243 | 0.23795 | 0.4063 |
| 33 | 37 | 1 | 0.3025 | 0.04211 | 0.23029 | 0.3974 |
| 34 | 36 | 2 | 0.2857 | 0.04141 | 0.21506 | 0.3796 |
| 35 | 34 | 3 | 0.2605 | 0.04023 | 0.19246 | 0.3526 |
| 36 | 31 | 3 | 0.2353 | 0.03888 | 0.17019 | 0.3253 |
| 37 | 28 | 2 | 0.2185 | 0.03788 | 0.15554 | 0.3069 |
| 38 | 26 | 2 | 0.2017 | 0.03678 | 0.14107 | 0.2883 |
| 39 | 24 | 2 | 0.1849 | 0.03559 | 0.12677 | 0.2696 |
| 40 | 22 | 2 | 0.1681 | 0.03428 | 0.11269 | 0.2507 |
| 41 | 20 | 2 | 0.1513 | 0.03285 | 0.09883 | 0.2315 |
| 42 | 18 | 2 | 0.1345 | 0.03127 | 0.08523 | 0.2121 |
| 43 | 16 | 2 | 0.1176 | 0.02954 | 0.07193 | 0.1924 |
| 44 | 14 | 2 | 0.1008 | 0.0276 | 0.05897 | 0.1724 |
| 45 | 12 | 2 | 0.084 | 0.02543 | 0.04643 | 0.1521 |
| 46 | 10 | 2 | 0.0672 | 0.02296 | 0.03443 | 0.1313 |
| 47 | 8 | 1 | 0.0588 | 0.02157 | 0.02867 | 0.1207 |
| 48 | 7 | 1 | 0.0504 | 0.02006 | 0.02312 | 0.11 |
| 49 | 6 | 1 | 0.042 | 0.01839 | 0.01782 | 0.0991 |
| 97 | 5 | 1 | 0.0336 | 0.01652 | 0.01283 | 0.0881 |
| 98 | 4 | 1 | 0.0252 | 0.01437 | 0.00825 | 0.0771 |
| 100 | 3 | 1 | 0.0168 | 0.01178 | 0.00425 | 0.0664 |
| 101 | 2 | 1 | 0.0084 | 0.00837 | 0.00119 | 0.0592 |
| 102 | 1 | 1 | 0 | NaN | NA | NA |

**Table S57.** Demirci station Kaplan-Meier drought risk estimates according to SPEI-3, 6, and 12

| Drought Risk (SPEI3) | | Drought Risk (SPEI6) | | Drought Risk (SPEI12) | |
| --- | --- | --- | --- | --- | --- |
| Time | Drought Risk | Time | Drought Risk | Time | Drought Risk |
| 1 | 0.03008 | 1 | 0.02586 | 1 | 0.0168 |
| 2 | 0.04511 | 2 | 0.06897 | 2 | 0.042 |
| 3 | 0.11278 | 3 | 0.09483 | 3 | 0.0672 |
| 4 | 0.21053 | 4 | 0.12069 | 4 | 0.1008 |
| 5 | 0.2782 | 5 | 0.14655 | 5 | 0.1261 |
| 6 | 0.35338 | 6 | 0.2069 | 6 | 0.1681 |
| 7 | 0.41353 | 7 | 0.27586 | 7 | 0.2017 |
| 8 | 0.47368 | 8 | 0.32759 | 8 | 0.2353 |
| 9 | 0.5188 | 9 | 0.36207 | 9 | 0.2521 |
| 10 | 0.55639 | 10 | 0.41379 | 10 | 0.2689 |
| 11 | 0.59398 | 11 | 0.44828 | 11 | 0.2773 |
| 12 | 0.61654 | 12 | 0.48276 | 12 | 0.2941 |
| 13 | 0.64662 | 13 | 0.51724 | 13 | 0.3193 |
| 14 | 0.67669 | 14 | 0.5431 | 14 | 0.3445 |
| 15 | 0.71429 | 15 | 0.57759 | 15 | 0.3782 |
| 16 | 0.73684 | 16 | 0.62931 | 16 | 0.395 |
| 17 | 0.7594 | 17 | 0.68103 | 17 | 0.4118 |
| 18 | 0.77444 | 18 | 0.71552 | 18 | 0.4286 |
| 19 | 0.80451 | 19 | 0.74138 | 19 | 0.437 |
| 20 | 0.82707 | 20 | 0.76724 | 20 | 0.4454 |
| 21 | 0.84211 | 21 | 0.7931 | 21 | 0.4622 |
| 22 | 0.84962 | 22 | 0.81034 | 22 | 0.4706 |
| 23 | 0.85714 | 23 | 0.81897 | 23 | 0.4874 |
| 24 | 0.87218 | 24 | 0.83621 | 24 | 0.5126 |
| 25 | 0.89474 | 25 | 0.84483 | 25 | 0.5378 |
| 26 | 0.91729 | 26 | 0.85345 | 26 | 0.563 |
| 27 | 0.93985 | 27 | 0.86207 | 27 | 0.5798 |
| 28 | 0.95489 | 28 | 0.87931 | 28 | 0.6134 |
| 29 | 0.96241 | 29 | 0.90517 | 29 | 0.6387 |
| 30 | 0.96992 | 30 | 0.92241 | 30 | 0.6555 |
| 31 | 0.98496 | 31 | 0.93103 | 31 | 0.6723 |
| 32 | 0.99248 | 32 | 0.93966 | 32 | 0.6891 |
| 76 | 1 | 37 | 0.94828 | 33 | 0.6975 |
|  |  | 38 | 0.9569 | 34 | 0.7143 |
|  |  | 42 | 0.96552 | 35 | 0.7395 |
|  |  | 43 | 0.97414 | 36 | 0.7647 |
|  |  | 44 | 0.98276 | 37 | 0.7815 |
|  |  | 45 | 0.99138 | 38 | 0.7983 |
|  |  | 103 | 1 | 39 | 0.8151 |
|  |  |  |  | 40 | 0.8319 |
|  |  |  |  | 41 | 0.8487 |
|  |  |  |  | 42 | 0.8655 |
|  |  |  |  | 43 | 0.8824 |
|  |  |  |  | 44 | 0.8992 |
|  |  |  |  | 45 | 0.916 |
|  |  |  |  | 46 | 0.9328 |
|  |  |  |  | 47 | 0.9412 |
|  |  |  |  | 48 | 0.9496 |
|  |  |  |  | 49 | 0.958 |
|  |  |  |  | 97 | 0.9664 |
|  |  |  |  | 98 | 0.9748 |
|  |  |  |  | 100 | 0.9832 |
|  |  |  |  | 101 | 0.9916 |
|  |  |  |  | 102 | 1 |

**Table S58.** Esme station Kaplan-Meier survival estimates according to SPI-3

| Kaplan-Meier Wet to Dry (SPI3) | | | | | | |
| --- | --- | --- | --- | --- | --- | --- |
|  |  | n | events | median | 0.95LCL | 0.95UCL |
|  |  | 61 | 61 | 8 | 7 | 10 |
| time | n.risk | n.event | survival | std.err | lower 95% CL | upper 95% CL |
| 1 | 61 | 3 | 0.9508 | 0.0277 | 0.89807 | 1 |
| 2 | 58 | 3 | 0.9016 | 0.0381 | 0.82992 | 0.98 |
| 3 | 55 | 4 | 0.8361 | 0.0474 | 0.74814 | 0.934 |
| 4 | 51 | 6 | 0.7377 | 0.0563 | 0.63518 | 0.857 |
| 5 | 45 | 4 | 0.6721 | 0.0601 | 0.56407 | 0.801 |
| 6 | 41 | 3 | 0.623 | 0.0621 | 0.51247 | 0.757 |
| 7 | 38 | 5 | 0.541 | 0.0638 | 0.42933 | 0.682 |
| 8 | 33 | 5 | 0.459 | 0.0638 | 0.34955 | 0.603 |
| 9 | 28 | 5 | 0.377 | 0.0621 | 0.27309 | 0.521 |
| 10 | 23 | 4 | 0.3115 | 0.0593 | 0.21448 | 0.452 |
| 11 | 19 | 3 | 0.2623 | 0.0563 | 0.17219 | 0.4 |
| 12 | 16 | 3 | 0.2131 | 0.0524 | 0.13158 | 0.345 |
| 13 | 13 | 2 | 0.1803 | 0.0492 | 0.10561 | 0.308 |
| 16 | 11 | 1 | 0.1639 | 0.0474 | 0.09301 | 0.289 |
| 17 | 10 | 2 | 0.1311 | 0.0432 | 0.06875 | 0.25 |
| 18 | 8 | 1 | 0.1148 | 0.0408 | 0.05716 | 0.23 |
| 21 | 7 | 2 | 0.082 | 0.0351 | 0.03539 | 0.19 |
| 22 | 5 | 1 | 0.0656 | 0.0317 | 0.02543 | 0.169 |
| 23 | 4 | 1 | 0.0492 | 0.0277 | 0.01631 | 0.148 |
| 29 | 3 | 1 | 0.0328 | 0.0228 | 0.00839 | 0.128 |
| 53 | 2 | 1 | 0.0164 | 0.0163 | 0.00235 | 0.115 |
| 64 | 1 | 1 | 0 | NaN | NA | NA |

**Table S59.** Esme station Kaplan-Meier survival estimates according to SPI-6

| Kaplan-Meier Wet to Dry (SPI6) | | | | | | |
| --- | --- | --- | --- | --- | --- | --- |
|  |  | n | events | median | 0.95LCL | 0.95UCL |
|  |  | 73 | 73 | 15 | 13 | 18 |
| time | n.risk | n.event | survival | std.err | lower 95% CL | upper 95% CL |
| 1 | 73 | 3 | 0.9589 | 0.0232 | 0.91443 | 1 |
| 2 | 70 | 5 | 0.8904 | 0.0366 | 0.82156 | 0.965 |
| 3 | 65 | 4 | 0.8356 | 0.0434 | 0.75478 | 0.9251 |
| 4 | 61 | 2 | 0.8082 | 0.0461 | 0.72277 | 0.9038 |
| 5 | 59 | 2 | 0.7808 | 0.0484 | 0.69146 | 0.8817 |
| 6 | 57 | 2 | 0.7534 | 0.0504 | 0.66076 | 0.8591 |
| 7 | 55 | 1 | 0.7397 | 0.0514 | 0.64562 | 0.8476 |
| 9 | 54 | 2 | 0.7123 | 0.053 | 0.6157 | 0.8241 |
| 10 | 52 | 1 | 0.6986 | 0.0537 | 0.60092 | 0.8122 |
| 11 | 51 | 2 | 0.6712 | 0.055 | 0.57168 | 0.7881 |
| 12 | 49 | 4 | 0.6164 | 0.0569 | 0.5144 | 0.7387 |
| 13 | 45 | 2 | 0.589 | 0.0576 | 0.48633 | 0.7134 |
| 14 | 43 | 4 | 0.5342 | 0.0584 | 0.43124 | 0.6619 |
| 15 | 39 | 3 | 0.4932 | 0.0585 | 0.39082 | 0.6223 |
| 16 | 36 | 4 | 0.4384 | 0.0581 | 0.33811 | 0.5683 |
| 17 | 32 | 3 | 0.3973 | 0.0573 | 0.29947 | 0.527 |
| 18 | 29 | 5 | 0.3288 | 0.055 | 0.23688 | 0.4563 |
| 19 | 24 | 3 | 0.2877 | 0.053 | 0.20051 | 0.4127 |
| 20 | 21 | 1 | 0.274 | 0.0522 | 0.18859 | 0.398 |
| 21 | 20 | 1 | 0.2603 | 0.0514 | 0.1768 | 0.3832 |
| 22 | 19 | 2 | 0.2329 | 0.0495 | 0.15357 | 0.3531 |
| 23 | 17 | 1 | 0.2192 | 0.0484 | 0.14215 | 0.3379 |
| 24 | 16 | 1 | 0.2055 | 0.0473 | 0.13088 | 0.3226 |
| 25 | 15 | 1 | 0.1918 | 0.0461 | 0.11975 | 0.3071 |
| 26 | 14 | 1 | 0.1781 | 0.0448 | 0.10879 | 0.2915 |
| 27 | 13 | 1 | 0.1644 | 0.0434 | 0.098 | 0.2757 |
| 28 | 12 | 2 | 0.137 | 0.0402 | 0.07702 | 0.2436 |
| 29 | 10 | 1 | 0.1233 | 0.0385 | 0.06687 | 0.2273 |
| 74 | 9 | 1 | 0.1096 | 0.0366 | 0.05699 | 0.2107 |
| 75 | 8 | 1 | 0.0959 | 0.0345 | 0.04741 | 0.1939 |
| 76 | 7 | 1 | 0.0822 | 0.0321 | 0.03819 | 0.1769 |
| 77 | 6 | 1 | 0.0685 | 0.0296 | 0.02939 | 0.1596 |
| 78 | 5 | 1 | 0.0548 | 0.0266 | 0.02113 | 0.1421 |
| 89 | 4 | 1 | 0.0411 | 0.0232 | 0.01357 | 0.1245 |
| 90 | 3 | 1 | 0.0274 | 0.0191 | 0.00698 | 0.1075 |
| 91 | 2 | 1 | 0.0137 | 0.0136 | 0.00196 | 0.0959 |
| 92 | 1 | 1 | 0 | NaN | NA | NA |

**Table S60.** Esme station Kaplan-Meier survival estimates according to SPI-12

| Kaplan-Meier Wet to Dry (SPI12) | | | | | | |
| --- | --- | --- | --- | --- | --- | --- |
|  |  | n | events | median | 0.95LCL | 0.95UCL |
|  |  | 61 | 61 | 22 | 17 | 31 |
| time | n.risk | n.event | survival | std.err | lower 95% CL | upper 95% CL |
| 0 | 61 | 1 | 0.9836 | 0.0163 | 0.95225 | 1 |
| 2 | 60 | 1 | 0.9672 | 0.0228 | 0.92354 | 1 |
| 3 | 59 | 1 | 0.9508 | 0.0277 | 0.89807 | 1 |
| 11 | 58 | 1 | 0.9344 | 0.0317 | 0.87433 | 0.999 |
| 12 | 57 | 2 | 0.9016 | 0.0381 | 0.82992 | 0.98 |
| 13 | 55 | 3 | 0.8525 | 0.0454 | 0.76795 | 0.946 |
| 14 | 52 | 4 | 0.7869 | 0.0524 | 0.69055 | 0.897 |
| 15 | 48 | 4 | 0.7213 | 0.0574 | 0.61713 | 0.843 |
| 16 | 44 | 4 | 0.6557 | 0.0608 | 0.54672 | 0.786 |
| 17 | 40 | 3 | 0.6066 | 0.0625 | 0.49556 | 0.742 |
| 18 | 37 | 2 | 0.5738 | 0.0633 | 0.46217 | 0.712 |
| 19 | 35 | 2 | 0.541 | 0.0638 | 0.42933 | 0.682 |
| 20 | 33 | 1 | 0.5246 | 0.0639 | 0.41311 | 0.666 |
| 21 | 32 | 1 | 0.5082 | 0.064 | 0.39703 | 0.65 |
| 22 | 31 | 1 | 0.4918 | 0.064 | 0.38107 | 0.635 |
| 23 | 30 | 1 | 0.4754 | 0.0639 | 0.36525 | 0.619 |
| 24 | 29 | 1 | 0.459 | 0.0638 | 0.34955 | 0.603 |
| 25 | 28 | 1 | 0.4426 | 0.0636 | 0.33399 | 0.587 |
| 26 | 27 | 1 | 0.4262 | 0.0633 | 0.31856 | 0.57 |
| 27 | 26 | 1 | 0.4098 | 0.063 | 0.30327 | 0.554 |
| 28 | 25 | 1 | 0.3934 | 0.0625 | 0.28811 | 0.537 |
| 29 | 24 | 1 | 0.377 | 0.0621 | 0.27309 | 0.521 |
| 30 | 23 | 1 | 0.3607 | 0.0615 | 0.25822 | 0.504 |
| 31 | 22 | 1 | 0.3443 | 0.0608 | 0.24349 | 0.487 |
| 32 | 21 | 1 | 0.3279 | 0.0601 | 0.22891 | 0.47 |
| 36 | 20 | 1 | 0.3115 | 0.0593 | 0.21448 | 0.452 |
| 37 | 19 | 1 | 0.2951 | 0.0584 | 0.20021 | 0.435 |
| 54 | 18 | 1 | 0.2787 | 0.0574 | 0.18612 | 0.417 |
| 55 | 17 | 1 | 0.2623 | 0.0563 | 0.17219 | 0.4 |
| 56 | 16 | 1 | 0.2459 | 0.0551 | 0.15846 | 0.382 |
| 57 | 15 | 1 | 0.2295 | 0.0538 | 0.14491 | 0.363 |
| 58 | 14 | 1 | 0.2131 | 0.0524 | 0.13158 | 0.345 |
| 59 | 13 | 1 | 0.1967 | 0.0509 | 0.11847 | 0.327 |
| 60 | 12 | 1 | 0.1803 | 0.0492 | 0.10561 | 0.308 |
| 61 | 11 | 1 | 0.1639 | 0.0474 | 0.09301 | 0.289 |
| 72 | 10 | 1 | 0.1475 | 0.0454 | 0.08071 | 0.27 |
| 73 | 9 | 1 | 0.1311 | 0.0432 | 0.06875 | 0.25 |
| 74 | 8 | 1 | 0.1148 | 0.0408 | 0.05716 | 0.23 |
| 113 | 7 | 1 | 0.0984 | 0.0381 | 0.04601 | 0.21 |
| 114 | 6 | 1 | 0.082 | 0.0351 | 0.03539 | 0.19 |
| 115 | 5 | 1 | 0.0656 | 0.0317 | 0.02543 | 0.169 |
| 116 | 4 | 1 | 0.0492 | 0.0277 | 0.01631 | 0.148 |
| 117 | 3 | 1 | 0.0328 | 0.0228 | 0.00839 | 0.128 |
| 118 | 2 | 1 | 0.0164 | 0.0163 | 0.00235 | 0.115 |
| 119 | 1 | 1 | 0 | NaN | NA | NA |

**Table S61.** Esme station Kaplan-Meier drought risk estimates according to SPI-3, 6, and 12

| Drought Risk (SPI3) | | Drought Risk (SPI6) | | Drought Risk (SPI12) | |
| --- | --- | --- | --- | --- | --- |
| Time | Drought Risk | Time | Drought Risk | Time | Drought Risk |
| 1 | 0.0492 | 1 | 0.0411 | 0 | 0.0164 |
| 2 | 0.0984 | 2 | 0.1096 | 2 | 0.0328 |
| 3 | 0.1639 | 3 | 0.1644 | 3 | 0.0492 |
| 4 | 0.2623 | 4 | 0.1918 | 6 | 0.05535 |
| 5 | 0.3279 | 5 | 0.2192 | 11 | 0.0656 |
| 6 | 0.377 | 6 | 0.2466 | 12 | 0.0984 |
| 7 | 0.459 | 7 | 0.2603 | 13 | 0.1475 |
| 8 | 0.541 | 9 | 0.2877 | 14 | 0.2131 |
| 9 | 0.623 | 10 | 0.3014 | 15 | 0.2787 |
| 10 | 0.6885 | 11 | 0.3288 | 16 | 0.3443 |
| 11 | 0.7377 | 12 | 0.3836 | 17 | 0.3934 |
| 12 | 0.7869 | 13 | 0.411 | 18 | 0.4262 |
| 13 | 0.8197 | 14 | 0.4658 | 19 | 0.459 |
| 16 | 0.8361 | 15 | 0.5068 | 20 | 0.4754 |
| 17 | 0.8689 | 16 | 0.5616 | 21 | 0.4918 |
| 18 | 0.8852 | 17 | 0.6027 | 22 | 0.5082 |
| 21 | 0.918 | 18 | 0.6712 | 23 | 0.5246 |
| 22 | 0.9344 | 19 | 0.7123 | 24 | 0.541 |
| 23 | 0.9508 | 20 | 0.726 | 25 | 0.5574 |
| 29 | 0.9672 | 21 | 0.7397 | 26 | 0.5738 |
| 53 | 0.9836 | 22 | 0.7671 | 27 | 0.5902 |
| 64 | 1 | 23 | 0.7808 | 28 | 0.6066 |
|  |  | 24 | 0.7945 | 29 | 0.623 |
|  |  | 25 | 0.8082 | 30 | 0.6393 |
|  |  | 26 | 0.8219 | 31 | 0.6557 |
|  |  | 27 | 0.8356 | 32 | 0.6721 |
|  |  | 28 | 0.863 | 36 | 0.6885 |
|  |  | 29 | 0.8767 | 37 | 0.7049 |
|  |  | 74 | 0.8904 | 54 | 0.7213 |
|  |  | 75 | 0.9041 | 55 | 0.7377 |
|  |  | 76 | 0.9178 | 56 | 0.7541 |
|  |  | 77 | 0.9315 | 57 | 0.7705 |
|  |  | 78 | 0.9452 | 58 | 0.7869 |
|  |  | 89 | 0.9589 | 59 | 0.8033 |
|  |  | 90 | 0.9726 | 60 | 0.8197 |
|  |  | 91 | 0.9863 | 61 | 0.8361 |
|  |  | 92 | 1 | 72 | 0.8525 |
|  |  |  |  | 73 | 0.8689 |
|  |  |  |  | 74 | 0.8852 |
|  |  |  |  | 113 | 0.9016 |
|  |  |  |  | 114 | 0.918 |
|  |  |  |  | 115 | 0.9344 |
|  |  |  |  | 116 | 0.9508 |
|  |  |  |  | 117 | 0.9672 |
|  |  |  |  | 118 | 0.9836 |
|  |  |  |  | 119 | 1 |

**Table S62.** Esme station Kaplan-Meier survival estimates according to SPEI-3

| Kaplan-Meier Wet to Dry (SPEI3) | | | | | | | |
| --- | --- | --- | --- | --- | --- | --- | --- |
|  |  | n | events | median | 0.95LCL | 0.95UCL |
|  |  | 75 | 75 | 11 | 9 | 13 |
| time | n.risk | n.event | survival | std.err | lower 95% CI | upper 95% CI |
| 1 | 75 | 2 | 0.9733 | 0.0186 | 0.93755 | 10.000 |
| 2 | 73 | 2 | 0.9467 | 0.0259 | 0.89716 | 0.9989 |
| 3 | 71 | 1 | 0.9333 | 0.0288 | 0.87855 | 0.9915 |
| 4 | 70 | 3 | 0.8933 | 0.0356 | 0.82613 | 0.966 |
| 5 | 67 | 3 | 0.8533 | 0.0409 | 0.77691 | 0.9373 |
| 6 | 64 | 3 | 0.8133 | 0.045 | 0.72976 | 0.9065 |
| 7 | 61 | 6 | 0.7333 | 0.0511 | 0.63978 | 0.8406 |
| 8 | 55 | 6 | 0.6533 | 0.055 | 0.55404 | 0.7704 |
| 9 | 49 | 5 | 0.5867 | 0.0569 | 0.48517 | 0.7094 |
| 10 | 44 | 6 | 0.5067 | 0.0577 | 0.40526 | 0.6334 |
| 11 | 38 | 4 | 0.4533 | 0.0575 | 0.35358 | 0.5812 |
| 12 | 34 | 3 | 0.4133 | 0.0569 | 0.31565 | 0.5412 |
| 13 | 31 | 4 | 0.36 | 0.0554 | 0.26623 | 0.4868 |
| 14 | 27 | 3 | 0.32 | 0.0539 | 0.23008 | 0.4451 |
| 15 | 24 | 3 | 0.28 | 0.0518 | 0.19478 | 0.4025 |
| 16 | 21 | 3 | 0.24 | 0.0493 | 0.16044 | 0.359 |
| 17 | 18 | 3 | 0.2 | 0.0462 | 0.12719 | 0.3145 |
| 18 | 15 | 3 | 0.16 | 0.0423 | 0.09526 | 0.2687 |
| 19 | 12 | 4 | 0.1067 | 0.0356 | 0.05541 | 0.2053 |
| 20 | 8 | 1 | 0.0933 | 0.0336 | 0.0461 | 0.189 |
| 22 | 7 | 2 | 0.0667 | 0.0288 | 0.02859 | 0.1555 |
| 23 | 5 | 2 | 0.04 | 0.0226 | 0.0132 | 0.1212 |
| 35 | 3 | 1 | 0.0267 | 0.0186 | 0.00679 | 0.1047 |
| 47 | 2 | 1 | 0.0133 | 0.0132 | 0.0019 | 0.0934 |
| 48 | 1 | 1 | 0 | NaN | NA | NA |

**Table S63.** Esme station Kaplan-Meier survival estimates according to SPEI-6

| Kaplan-Meier Wet to Dry (SPEI6) | | | | | | | |
| --- | --- | --- | --- | --- | --- | --- | --- |
|  |  | n | events | median | 0.95LCL | 0.95UCL |
|  |  | 77 | 77 | 15 | 13 | 17 |
| time | n.risk | n.event | survival | std.err | lower 95% CI | upper 95% CI |
| 1 | 77 | 4 | 0.9481 | 0.0253 | 0.89976 | 0.999 |
| 2 | 73 | 5 | 0.8831 | 0.0366 | 0.81419 | 0.958 |
| 3 | 68 | 3 | 0.8442 | 0.0413 | 0.76691 | 0.929 |
| 4 | 65 | 3 | 0.8052 | 0.0451 | 0.72142 | 0.899 |
| 5 | 62 | 2 | 0.7792 | 0.0473 | 0.69187 | 0.878 |
| 6 | 60 | 3 | 0.7403 | 0.05 | 0.64852 | 0.845 |
| 7 | 57 | 1 | 0.7273 | 0.0508 | 0.6343 | 0.834 |
| 8 | 56 | 2 | 0.7013 | 0.0522 | 0.60617 | 0.811 |
| 9 | 54 | 1 | 0.6883 | 0.0528 | 0.59226 | 0.8 |
| 10 | 53 | 1 | 0.6753 | 0.0534 | 0.57843 | 0.788 |
| 11 | 52 | 3 | 0.6364 | 0.0548 | 0.5375 | 0.753 |
| 12 | 49 | 2 | 0.6104 | 0.0556 | 0.51063 | 0.73 |
| 13 | 47 | 2 | 0.5844 | 0.0562 | 0.48408 | 0.706 |
| 14 | 45 | 3 | 0.5455 | 0.0567 | 0.44484 | 0.669 |
| 15 | 42 | 4 | 0.4935 | 0.057 | 0.39357 | 0.619 |
| 16 | 38 | 5 | 0.4286 | 0.0564 | 0.33114 | 0.555 |
| 17 | 33 | 6 | 0.3506 | 0.0544 | 0.25874 | 0.475 |
| 18 | 27 | 7 | 0.2597 | 0.05 | 0.17815 | 0.379 |
| 19 | 20 | 5 | 0.1948 | 0.0451 | 0.1237 | 0.307 |
| 20 | 15 | 4 | 0.1429 | 0.0399 | 0.08266 | 0.247 |
| 21 | 11 | 2 | 0.1169 | 0.0366 | 0.06326 | 0.216 |
| 22 | 9 | 1 | 0.1039 | 0.0348 | 0.05392 | 0.2 |
| 23 | 8 | 1 | 0.0909 | 0.0328 | 0.04486 | 0.184 |
| 28 | 7 | 1 | 0.0779 | 0.0305 | 0.03614 | 0.168 |
| 29 | 6 | 1 | 0.0649 | 0.0281 | 0.02782 | 0.152 |
| 34 | 5 | 1 | 0.0519 | 0.0253 | 0.02001 | 0.135 |
| 37 | 4 | 1 | 0.039 | 0.0221 | 0.01285 | 0.118 |
| 74 | 3 | 1 | 0.026 | 0.0181 | 0.00661 | 0.102 |
| 75 | 2 | 1 | 0.013 | 0.0129 | 0.00185 | 0.091 |
| 76 | 1 | 1 | 0 | NaN | NA | NA |

**Table S64.** Esme station Kaplan-Meier survival estimates according to SPEI-12

| Kaplan-Meier Wet to Dry (SPEI12) | | | | | | | |
| --- | --- | --- | --- | --- | --- | --- | --- |
|  |  | n | events | median | 0.95LCL | 0.95UCL |
|  |  | 82 | 82 | 18.5 | 16 | 21 |
| time | n.risk | n.event | survival | std.err | lower 95% CI | upper 95% CI |
| 1 | 82 | 3 | 0.9634 | 0.0207 | 0.92362 | 10.000 |
| 6 | 79 | 1 | 0.9512 | 0.0238 | 0.90572 | 0.999 |
| 7 | 78 | 1 | 0.939 | 0.0264 | 0.88864 | 0.9923 |
| 8 | 77 | 1 | 0.9268 | 0.0288 | 0.87214 | 0.9849 |
| 9 | 76 | 1 | 0.9146 | 0.0309 | 0.85611 | 0.9772 |
| 10 | 75 | 2 | 0.8902 | 0.0345 | 0.82509 | 0.9605 |
| 11 | 73 | 3 | 0.8537 | 0.039 | 0.78049 | 0.9337 |
| 12 | 70 | 5 | 0.7927 | 0.0448 | 0.70962 | 0.8855 |
| 13 | 65 | 4 | 0.7439 | 0.0482 | 0.65518 | 0.8446 |
| 14 | 61 | 4 | 0.6951 | 0.0508 | 0.60229 | 0.8023 |
| 15 | 57 | 4 | 0.6463 | 0.0528 | 0.55072 | 0.7586 |
| 16 | 53 | 5 | 0.5854 | 0.0544 | 0.48788 | 0.7023 |
| 17 | 48 | 4 | 0.5366 | 0.0551 | 0.43882 | 0.6561 |
| 18 | 44 | 3 | 0.5 | 0.0552 | 0.40269 | 0.6208 |
| 19 | 41 | 4 | 0.4512 | 0.055 | 0.3554 | 0.5729 |
| 20 | 37 | 3 | 0.4146 | 0.0544 | 0.32061 | 0.5362 |
| 21 | 34 | 3 | 0.378 | 0.0535 | 0.2864 | 0.499 |
| 22 | 31 | 2 | 0.3537 | 0.0528 | 0.26394 | 0.4739 |
| 23 | 29 | 2 | 0.3293 | 0.0519 | 0.24176 | 0.4484 |
| 24 | 27 | 3 | 0.2927 | 0.0502 | 0.20906 | 0.4098 |
| 25 | 24 | 2 | 0.2683 | 0.0489 | 0.18766 | 0.3836 |
| 26 | 22 | 1 | 0.2561 | 0.0482 | 0.17709 | 0.3703 |
| 27 | 21 | 1 | 0.2439 | 0.0474 | 0.16661 | 0.357 |
| 28 | 20 | 1 | 0.2317 | 0.0466 | 0.15623 | 0.3436 |
| 29 | 19 | 1 | 0.2195 | 0.0457 | 0.14595 | 0.3301 |
| 30 | 18 | 1 | 0.2073 | 0.0448 | 0.13578 | 0.3165 |
| 31 | 17 | 1 | 0.1951 | 0.0438 | 0.12572 | 0.3028 |
| 32 | 16 | 1 | 0.1829 | 0.0427 | 0.11577 | 0.289 |
| 33 | 15 | 1 | 0.1707 | 0.0416 | 0.10596 | 0.2751 |
| 34 | 14 | 1 | 0.1585 | 0.0403 | 0.09629 | 0.261 |
| 35 | 13 | 1 | 0.1463 | 0.039 | 0.08676 | 0.2468 |
| 36 | 12 | 1 | 0.1341 | 0.0376 | 0.0774 | 0.2325 |
| 37 | 11 | 1 | 0.122 | 0.0361 | 0.06823 | 0.218 |
| 41 | 10 | 1 | 0.1098 | 0.0345 | 0.05925 | 0.2033 |
| 64 | 9 | 1 | 0.0976 | 0.0328 | 0.05051 | 0.1884 |
| 65 | 8 | 1 | 0.0854 | 0.0309 | 0.04203 | 0.1734 |
| 66 | 7 | 1 | 0.0732 | 0.0288 | 0.03387 | 0.1581 |
| 67 | 6 | 1 | 0.061 | 0.0264 | 0.02608 | 0.1426 |
| 68 | 5 | 1 | 0.0488 | 0.0238 | 0.01876 | 0.1269 |
| 69 | 4 | 1 | 0.0366 | 0.0207 | 0.01205 | 0.1111 |
| 72 | 3 | 1 | 0.0244 | 0.017 | 0.0062 | 0.0959 |
| 73 | 2 | 1 | 0.0122 | 0.0121 | 0.00174 | 0.0855 |
| 74 | 1 | 1 | 0 | NaN | NA | NA |

**Table S65.** Esme station Kaplan-Meier drought risk estimates according to SPEI-3, 6, and 12

| Drought Risk (SPEI3) | | Drought Risk (SPEI6) | | Drought Risk (SPEI12) | |
| --- | --- | --- | --- | --- | --- |
| Time | Drought Risk | Time | Drought Risk | Time | Drought Risk |
| 1 | 0.0267 | 1 | 0.0519 | 1 | 0.0366 |
| 2 | 0.0533 | 2 | 0.1169 | 3 | 0.04148 |
| 3 | 0.0667 | 3 | 0.1558 | 6 | 0.0488 |
| 4 | 0.1067 | 4 | 0.1948 | 7 | 0.061 |
| 5 | 0.1467 | 5 | 0.2208 | 8 | 0.0732 |
| 6 | 0.1867 | 6 | 0.2597 | 9 | 0.0854 |
| 7 | 0.2667 | 7 | 0.2727 | 10 | 0.1098 |
| 8 | 0.3467 | 8 | 0.2987 | 11 | 0.1463 |
| 9 | 0.4133 | 9 | 0.3117 | 12 | 0.2073 |
| 10 | 0.4933 | 10 | 0.3247 | 13 | 0.2561 |
| 11 | 0.5467 | 11 | 0.3636 | 14 | 0.3049 |
| 12 | 0.5867 | 12 | 0.3896 | 15 | 0.3537 |
| 13 | 0.64 | 13 | 0.4156 | 16 | 0.4146 |
| 14 | 0.68 | 14 | 0.4545 | 17 | 0.4634 |
| 15 | 0.72 | 15 | 0.5065 | 18 | 0.5 |
| 16 | 0.76 | 16 | 0.5714 | 19 | 0.5488 |
| 17 | 0.8 | 17 | 0.6494 | 20 | 0.5854 |
| 18 | 0.84 | 18 | 0.7403 | 21 | 0.622 |
| 19 | 0.8933 | 19 | 0.8052 | 22 | 0.6463 |
| 20 | 0.9067 | 20 | 0.8571 | 23 | 0.6707 |
| 22 | 0.9333 | 21 | 0.8831 | 24 | 0.7073 |
| 23 | 0.96 | 22 | 0.8961 | 25 | 0.7317 |
| 35 | 0.9733 | 23 | 0.9091 | 26 | 0.7439 |
| 47 | 0.9867 | 28 | 0.9221 | 27 | 0.7561 |
| 48 | 1 | 29 | 0.9351 | 28 | 0.7683 |
|  |  | 34 | 0.9481 | 29 | 0.7805 |
|  |  | 37 | 0.961 | 30 | 0.7927 |
|  |  | 74 | 0.974 | 31 | 0.8049 |
|  |  | 75 | 0.987 | 32 | 0.8171 |
|  |  | 76 | 1 | 33 | 0.8293 |
|  |  |  |  | 34 | 0.8415 |
|  |  |  |  | 35 | 0.8537 |
|  |  |  |  | 36 | 0.8659 |
|  |  |  |  | 37 | 0.878 |
|  |  |  |  | 41 | 0.8902 |
|  |  |  |  | 64 | 0.9024 |
|  |  |  |  | 65 | 0.9146 |
|  |  |  |  | 66 | 0.9268 |
|  |  |  |  | 67 | 0.939 |
|  |  |  |  | 68 | 0.9512 |
|  |  |  |  | 69 | 0.9634 |
|  |  |  |  | 72 | 0.9756 |
|  |  |  |  | 73 | 0.9878 |
|  |  |  |  | 74 | 1 |

**Table S66.** Foca station Kaplan-Meier survival estimates according to SPI-3

| Kaplan-Meier Wet to Dry (SPI3) | | | | | | |
| --- | --- | --- | --- | --- | --- | --- |
|  |  | n | events | median | 0.95LCL | 0.95UCL |
|  |  | 66 | 66 | 8.5 | 6 | 10 |
| time | n.risk | n.event | survival | std.err | lower 95% CL | upper 95% CL |
| 0 | 66 | 1 | 0.9848 | 0.015 | 0.95581 | 1 |
| 1 | 65 | 5 | 0.9091 | 0.0354 | 0.84231 | 0.981 |
| 2 | 60 | 4 | 0.8485 | 0.0441 | 0.76625 | 0.94 |
| 3 | 56 | 6 | 0.7576 | 0.0528 | 0.66093 | 0.868 |
| 4 | 50 | 5 | 0.6818 | 0.0573 | 0.57822 | 0.804 |
| 5 | 45 | 4 | 0.6212 | 0.0597 | 0.51455 | 0.75 |
| 6 | 41 | 2 | 0.5909 | 0.0605 | 0.48344 | 0.722 |
| 7 | 39 | 1 | 0.5758 | 0.0608 | 0.46806 | 0.708 |
| 8 | 38 | 5 | 0.5 | 0.0615 | 0.39282 | 0.636 |
| 9 | 33 | 8 | 0.3788 | 0.0597 | 0.27811 | 0.516 |
| 10 | 25 | 6 | 0.2879 | 0.0557 | 0.19698 | 0.421 |
| 11 | 19 | 5 | 0.2121 | 0.0503 | 0.13325 | 0.338 |
| 12 | 14 | 2 | 0.1818 | 0.0475 | 0.10899 | 0.303 |
| 13 | 12 | 2 | 0.1515 | 0.0441 | 0.08561 | 0.268 |
| 14 | 10 | 2 | 0.1212 | 0.0402 | 0.0633 | 0.232 |
| 15 | 8 | 3 | 0.0758 | 0.0326 | 0.03262 | 0.176 |
| 16 | 5 | 1 | 0.0606 | 0.0294 | 0.02344 | 0.157 |
| 23 | 4 | 1 | 0.0455 | 0.0256 | 0.01505 | 0.137 |
| 26 | 3 | 1 | 0.0303 | 0.0211 | 0.00774 | 0.119 |
| 27 | 2 | 1 | 0.0152 | 0.015 | 0.00217 | 0.106 |
| 38 | 1 | 1 | 0 | NaN | NA | NA |

**Table S67.** Foca station Kaplan-Meier survival estimates according to SPI-6

| Kaplan-Meier Wet to Dry (SPI6) | | | | | | |
| --- | --- | --- | --- | --- | --- | --- |
|  |  | n | events | median | 0.95LCL | 0.95UCL |
|  |  | 70 | 70 | 11 | 9 | 13 |
| time | n.risk | n.event | survival | std.err | lower 95% CL | upper 95% CL |
| 1 | 70 | 7 | 0.9 | 0.0359 | 0.8324 | 0.973 |
| 2 | 63 | 5 | 0.8286 | 0.045 | 0.74482 | 0.922 |
| 3 | 58 | 5 | 0.7571 | 0.0513 | 0.66307 | 0.865 |
| 4 | 53 | 1 | 0.7429 | 0.0522 | 0.64721 | 0.853 |
| 6 | 52 | 3 | 0.7 | 0.0548 | 0.60047 | 0.816 |
| 7 | 49 | 2 | 0.6714 | 0.0561 | 0.56994 | 0.791 |
| 8 | 47 | 4 | 0.6143 | 0.0582 | 0.51021 | 0.74 |
| 9 | 43 | 3 | 0.5714 | 0.0591 | 0.4665 | 0.7 |
| 10 | 40 | 4 | 0.5143 | 0.0597 | 0.40957 | 0.646 |
| 11 | 36 | 3 | 0.4714 | 0.0597 | 0.36786 | 0.604 |
| 12 | 33 | 5 | 0.4 | 0.0586 | 0.30023 | 0.533 |
| 13 | 28 | 7 | 0.3 | 0.0548 | 0.20976 | 0.429 |
| 14 | 21 | 4 | 0.2429 | 0.0513 | 0.16059 | 0.367 |
| 15 | 17 | 3 | 0.2 | 0.0478 | 0.12519 | 0.32 |
| 16 | 14 | 1 | 0.1857 | 0.0465 | 0.11371 | 0.303 |
| 17 | 13 | 1 | 0.1714 | 0.045 | 0.10243 | 0.287 |
| 19 | 12 | 2 | 0.1429 | 0.0418 | 0.08048 | 0.254 |
| 20 | 10 | 2 | 0.1143 | 0.038 | 0.05953 | 0.219 |
| 23 | 8 | 1 | 0.1 | 0.0359 | 0.04952 | 0.202 |
| 26 | 7 | 1 | 0.0857 | 0.0335 | 0.03988 | 0.184 |
| 27 | 6 | 1 | 0.0714 | 0.0308 | 0.03069 | 0.166 |
| 28 | 5 | 1 | 0.0571 | 0.0277 | 0.02206 | 0.148 |
| 29 | 4 | 1 | 0.0429 | 0.0242 | 0.01417 | 0.13 |
| 39 | 3 | 1 | 0.0286 | 0.0199 | 0.00729 | 0.112 |
| 41 | 2 | 1 | 0.0143 | 0.0142 | 0.00204 | 0.1 |
| 42 | 1 | 1 | 0 | NaN | NA | NA |

**Table S68.** Foca station Kaplan-Meier survival estimates according to SPI-12

| Kaplan-Meier Wet to Dry (SPI12) | | | | | | |
| --- | --- | --- | --- | --- | --- | --- |
|  |  | n | events | median | 0.95LCL | 0.95UCL |
|  |  | 64 | 64 | 10.5 | 7 | 19 |
| time | n.risk | n.event | survival | std.err | lower 95% CL | upper 95% CL |
| 0 | 64 | 1 | 0.9844 | 0.0155 | 0.95445 | 1 |
| 1 | 63 | 4 | 0.9219 | 0.0335 | 0.85842 | 0.99 |
| 2 | 59 | 4 | 0.8594 | 0.0435 | 0.77829 | 0.949 |
| 3 | 55 | 5 | 0.7812 | 0.0517 | 0.68626 | 0.889 |
| 4 | 50 | 4 | 0.7188 | 0.0562 | 0.61662 | 0.838 |
| 5 | 46 | 4 | 0.6562 | 0.0594 | 0.54962 | 0.784 |
| 6 | 42 | 2 | 0.625 | 0.0605 | 0.51697 | 0.756 |
| 7 | 40 | 2 | 0.5938 | 0.0614 | 0.48483 | 0.727 |
| 8 | 38 | 2 | 0.5625 | 0.062 | 0.4532 | 0.698 |
| 9 | 36 | 1 | 0.5469 | 0.0622 | 0.43756 | 0.684 |
| 10 | 35 | 3 | 0.5 | 0.0625 | 0.39135 | 0.639 |
| 11 | 32 | 2 | 0.4688 | 0.0624 | 0.36114 | 0.608 |
| 13 | 30 | 1 | 0.4531 | 0.0622 | 0.3462 | 0.593 |
| 16 | 29 | 1 | 0.4375 | 0.062 | 0.33138 | 0.578 |
| 17 | 28 | 1 | 0.4219 | 0.0617 | 0.31669 | 0.562 |
| 18 | 27 | 2 | 0.3906 | 0.061 | 0.28765 | 0.53 |
| 19 | 25 | 2 | 0.3594 | 0.06 | 0.25911 | 0.498 |
| 20 | 23 | 3 | 0.3125 | 0.0579 | 0.21729 | 0.449 |
| 21 | 20 | 2 | 0.2812 | 0.0562 | 0.19011 | 0.416 |
| 22 | 18 | 1 | 0.2656 | 0.0552 | 0.17675 | 0.399 |
| 23 | 17 | 1 | 0.25 | 0.0541 | 0.16355 | 0.382 |
| 24 | 16 | 1 | 0.2344 | 0.053 | 0.15052 | 0.365 |
| 25 | 15 | 2 | 0.2031 | 0.0503 | 0.12503 | 0.33 |
| 27 | 13 | 1 | 0.1875 | 0.0488 | 0.11259 | 0.312 |
| 28 | 12 | 1 | 0.1719 | 0.0472 | 0.10038 | 0.294 |
| 29 | 11 | 1 | 0.1562 | 0.0454 | 0.08842 | 0.276 |
| 36 | 10 | 1 | 0.1406 | 0.0435 | 0.07674 | 0.258 |
| 43 | 9 | 1 | 0.125 | 0.0413 | 0.06537 | 0.239 |
| 44 | 8 | 1 | 0.1094 | 0.039 | 0.05436 | 0.22 |
| 45 | 7 | 1 | 0.0938 | 0.0364 | 0.04377 | 0.201 |
| 46 | 6 | 1 | 0.0781 | 0.0335 | 0.03367 | 0.181 |
| 47 | 5 | 1 | 0.0625 | 0.0303 | 0.0242 | 0.161 |
| 48 | 4 | 1 | 0.0469 | 0.0264 | 0.01553 | 0.141 |
| 70 | 3 | 1 | 0.0312 | 0.0217 | 0.00799 | 0.122 |
| 71 | 2 | 1 | 0.0156 | 0.0155 | 0.00224 | 0.109 |
| 72 | 1 | 1 | 0 | NaN | NA | NA |

**Table S69.** Foca station Kaplan-Meier drought risk estimates according to SPI-3, 6, and 12

| Drought Risk (SPI3) | | Drought Risk (SPI6) | | Drought Risk (SPI12) | |
| --- | --- | --- | --- | --- | --- |
| Time | Drought Risk | Time | Drought Risk | Time | Drought Risk |
| 0 | 0.0152 | 1 | 0.1 | 0 | 0.0156 |
| 1 | 0.0909 | 2 | 0.1714 | 1 | 0.0781 |
| 2 | 0.1515 | 3 | 0.2429 | 2 | 0.1406 |
| 3 | 0.2424 | 4 | 0.2571 | 3 | 0.2188 |
| 4 | 0.3182 | 6 | 0.3 | 4 | 0.2812 |
| 5 | 0.3788 | 7 | 0.3286 | 5 | 0.3438 |
| 6 | 0.4091 | 8 | 0.3857 | 6 | 0.375 |
| 7 | 0.4242 | 9 | 0.4286 | 7 | 0.4062 |
| 8 | 0.5 | 10 | 0.4857 | 8 | 0.4375 |
| 9 | 0.6212 | 11 | 0.5286 | 9 | 0.4531 |
| 10 | 0.7121 | 12 | 0.6 | 10 | 0.5 |
| 11 | 0.7879 | 13 | 0.7 | 11 | 0.5312 |
| 12 | 0.8182 | 14 | 0.7571 | 12 | 0.53905 |
| 13 | 0.8485 | 15 | 0.8 | 13 | 0.5469 |
| 14 | 0.8788 | 16 | 0.8143 | 16 | 0.5625 |
| 15 | 0.9242 | 17 | 0.8286 | 17 | 0.5781 |
| 16 | 0.9394 | 19 | 0.8571 | 18 | 0.6094 |
| 23 | 0.9545 | 20 | 0.8857 | 19 | 0.6406 |
| 26 | 0.9697 | 23 | 0.9 | 20 | 0.6875 |
| 27 | 0.9848 | 26 | 0.9143 | 21 | 0.7188 |
| 38 | 1 | 27 | 0.9286 | 22 | 0.7344 |
|  |  | 28 | 0.9429 | 23 | 0.75 |
|  |  | 29 | 0.9571 | 24 | 0.7656 |
|  |  | 39 | 0.9714 | 25 | 0.7969 |
|  |  | 41 | 0.9857 | 27 | 0.8125 |
|  |  | 42 | 1 | 28 | 0.8281 |
|  |  |  |  | 29 | 0.8438 |
|  |  |  |  | 36 | 0.8594 |
|  |  |  |  | 43 | 0.875 |
|  |  |  |  | 44 | 0.8906 |
|  |  |  |  | 45 | 0.9062 |
|  |  |  |  | 46 | 0.9219 |
|  |  |  |  | 47 | 0.9375 |
|  |  |  |  | 48 | 0.9531 |
|  |  |  |  | 70 | 0.9688 |
|  |  |  |  | 71 | 0.9844 |
|  |  |  |  | 72 | 1 |

**Table S70.** Foca station Kaplan-Meier survival estimates according to SPEI-3

| Kaplan-Meier Wet to Dry (SPEI3) | | | | | | | |
| --- | --- | --- | --- | --- | --- | --- | --- |
|  |  | n | events | median | 0.95LCL | 0.95UCL |
|  |  | 81 | 81 | 7 | 5 | 9 |
| time | n.risk | n.event | survival | std.err | lower 95% CI | upper 95% CI |
| 0 | 81 | 1 | 0.9877 | 0.0123 | 0.9639 | 10.000 |
| 1 | 80 | 9 | 0.8765 | 0.0366 | 0.80775 | 0.9512 |
| 2 | 71 | 5 | 0.8148 | 0.0432 | 0.73446 | 0.904 |
| 3 | 66 | 9 | 0.7037 | 0.0507 | 0.61097 | 0.8105 |
| 4 | 57 | 4 | 0.6543 | 0.0528 | 0.55853 | 0.7665 |
| 5 | 53 | 6 | 0.5802 | 0.0548 | 0.48214 | 0.6983 |
| 6 | 47 | 5 | 0.5185 | 0.0555 | 0.42037 | 0.6396 |
| 7 | 42 | 7 | 0.4321 | 0.055 | 0.33663 | 0.5546 |
| 8 | 35 | 3 | 0.3951 | 0.0543 | 0.30174 | 0.5172 |
| 9 | 32 | 4 | 0.3457 | 0.0528 | 0.25618 | 0.4664 |
| 10 | 28 | 5 | 0.284 | 0.0501 | 0.20093 | 0.4013 |
| 11 | 23 | 4 | 0.2346 | 0.0471 | 0.15828 | 0.3476 |
| 12 | 19 | 3 | 0.1975 | 0.0442 | 0.12735 | 0.3064 |
| 14 | 16 | 1 | 0.1852 | 0.0432 | 0.11728 | 0.2924 |
| 15 | 15 | 2 | 0.1605 | 0.0408 | 0.09753 | 0.2641 |
| 16 | 13 | 2 | 0.1358 | 0.0381 | 0.0784 | 0.2352 |
| 17 | 11 | 4 | 0.0864 | 0.0312 | 0.04257 | 0.1754 |
| 18 | 7 | 1 | 0.0741 | 0.0291 | 0.0343 | 0.16 |
| 20 | 6 | 1 | 0.0617 | 0.0267 | 0.02641 | 0.1443 |
| 21 | 5 | 1 | 0.0494 | 0.0241 | 0.01899 | 0.1284 |
| 38 | 4 | 1 | 0.037 | 0.021 | 0.0122 | 0.1124 |
| 39 | 3 | 1 | 0.0247 | 0.0172 | 0.00628 | 0.097 |
| 40 | 2 | 1 | 0.0123 | 0.0123 | 0.00176 | 0.0866 |
| 41 | 1 | 1 | 0 | NaN | NA | NA |

**Table S71.** Foca station Kaplan-Meier survival estimates according to SPEI-6

| Kaplan-Meier Wet to Dry (SPEI6) | | | | | | | |
| --- | --- | --- | --- | --- | --- | --- | --- |
|  |  | n | events | median | 0.95LCL | 0.95UCL |
|  |  | 85 | 85 | 10 | 8 | 12 |
| time | n.risk | n.event | survival | std.err | lower 95% CI | upper 95% CI |
| 0 | 85 | 1 | 0.9882 | 0.0117 | 0.96558 | 10.000 |
| 1 | 84 | 8 | 0.8941 | 0.0334 | 0.83104 | 0.962 |
| 2 | 76 | 5 | 0.8353 | 0.0402 | 0.76005 | 0.918 |
| 3 | 71 | 3 | 0.8 | 0.0434 | 0.71933 | 0.8897 |
| 4 | 68 | 2 | 0.7765 | 0.0452 | 0.69277 | 0.8703 |
| 5 | 66 | 2 | 0.7529 | 0.0468 | 0.66661 | 0.8504 |
| 6 | 64 | 6 | 0.6824 | 0.0505 | 0.59022 | 0.7889 |
| 7 | 58 | 7 | 0.6 | 0.0531 | 0.50439 | 0.7137 |
| 8 | 51 | 3 | 0.5647 | 0.0538 | 0.46856 | 0.6806 |
| 9 | 48 | 5 | 0.5059 | 0.0542 | 0.41002 | 0.6242 |
| 10 | 43 | 5 | 0.4471 | 0.0539 | 0.35293 | 0.5663 |
| 11 | 38 | 5 | 0.3882 | 0.0529 | 0.2973 | 0.507 |
| 12 | 33 | 5 | 0.3294 | 0.051 | 0.24323 | 0.4461 |
| 13 | 28 | 4 | 0.2824 | 0.0488 | 0.20119 | 0.3963 |
| 14 | 24 | 2 | 0.2588 | 0.0475 | 0.18062 | 0.3709 |
| 18 | 22 | 1 | 0.2471 | 0.0468 | 0.17046 | 0.3581 |
| 19 | 21 | 2 | 0.2235 | 0.0452 | 0.1504 | 0.3322 |
| 20 | 19 | 1 | 0.2118 | 0.0443 | 0.14052 | 0.3191 |
| 22 | 18 | 1 | 0.2 | 0.0434 | 0.13073 | 0.306 |
| 23 | 17 | 2 | 0.1765 | 0.0413 | 0.11149 | 0.2793 |
| 24 | 15 | 2 | 0.1529 | 0.039 | 0.09274 | 0.2522 |
| 26 | 13 | 1 | 0.1412 | 0.0378 | 0.08357 | 0.2385 |
| 27 | 12 | 1 | 0.1294 | 0.0364 | 0.07456 | 0.2246 |
| 28 | 11 | 1 | 0.1176 | 0.0349 | 0.06573 | 0.2106 |
| 29 | 10 | 1 | 0.1059 | 0.0334 | 0.05709 | 0.1964 |
| 38 | 9 | 1 | 0.0941 | 0.0317 | 0.04867 | 0.182 |
| 39 | 8 | 1 | 0.0824 | 0.0298 | 0.0405 | 0.1674 |
| 40 | 7 | 1 | 0.0706 | 0.0278 | 0.03264 | 0.1527 |
| 41 | 6 | 1 | 0.0588 | 0.0255 | 0.02513 | 0.1377 |
| 42 | 5 | 1 | 0.0471 | 0.023 | 0.01808 | 0.1225 |
| 63 | 4 | 1 | 0.0353 | 0.02 | 0.01161 | 0.1072 |
| 64 | 3 | 1 | 0.0235 | 0.0164 | 0.00598 | 0.0926 |
| 65 | 2 | 1 | 0.0118 | 0.0117 | 0.00168 | 0.0826 |
| 66 | 1 | 1 | 0 | NaN | NA | NA |

**Table S72.** Foca station Kaplan-Meier survival estimates according to SPEI-12

| Kaplan-Meier Wet to Dry (SPEI12) | | | | | | | |
| --- | --- | --- | --- | --- | --- | --- | --- |
|  |  | n | events | median | 0.95LCL | 0.95UCL |
|  |  | 72 | 72 | 13.5 | 9 | 18 |
| time | n.risk | n.event | survival | std.err | lower 95% CI | upper 95% CI |
| 0 | 72 | 1 | 0.9861 | 0.0138 | 0.95945 | 10.000 |
| 1 | 71 | 5 | 0.9167 | 0.0326 | 0.855 | 0.9828 |
| 2 | 66 | 3 | 0.875 | 0.039 | 0.80185 | 0.9548 |
| 3 | 63 | 3 | 0.8333 | 0.0439 | 0.75155 | 0.924 |
| 4 | 60 | 4 | 0.7778 | 0.049 | 0.68744 | 0.88 |
| 5 | 56 | 3 | 0.7361 | 0.0519 | 0.64103 | 0.8453 |
| 6 | 53 | 3 | 0.6944 | 0.0543 | 0.59579 | 0.8094 |
| 7 | 50 | 4 | 0.6389 | 0.0566 | 0.53704 | 0.7601 |
| 8 | 46 | 2 | 0.6111 | 0.0575 | 0.50827 | 0.7348 |
| 9 | 44 | 1 | 0.5972 | 0.0578 | 0.49403 | 0.722 |
| 10 | 43 | 2 | 0.5694 | 0.0584 | 0.46583 | 0.6961 |
| 11 | 41 | 1 | 0.5556 | 0.0586 | 0.45186 | 0.683 |
| 12 | 40 | 3 | 0.5139 | 0.0589 | 0.41049 | 0.6433 |
| 13 | 37 | 1 | 0.5 | 0.0589 | 0.39688 | 0.6299 |
| 14 | 36 | 1 | 0.4861 | 0.0589 | 0.38335 | 0.6164 |
| 15 | 35 | 2 | 0.4583 | 0.0587 | 0.35656 | 0.5892 |
| 16 | 33 | 3 | 0.4167 | 0.0581 | 0.31703 | 0.5476 |
| 17 | 30 | 3 | 0.375 | 0.0571 | 0.27831 | 0.5053 |
| 18 | 27 | 3 | 0.3333 | 0.0556 | 0.24044 | 0.4621 |
| 19 | 24 | 3 | 0.2917 | 0.0536 | 0.2035 | 0.418 |
| 20 | 21 | 4 | 0.2361 | 0.0501 | 0.15584 | 0.3577 |
| 21 | 17 | 2 | 0.2083 | 0.0479 | 0.1328 | 0.3268 |
| 22 | 15 | 1 | 0.1944 | 0.0466 | 0.12151 | 0.3112 |
| 23 | 14 | 1 | 0.1806 | 0.0453 | 0.11038 | 0.2953 |
| 24 | 13 | 1 | 0.1667 | 0.0439 | 0.09943 | 0.2794 |
| 25 | 12 | 1 | 0.1528 | 0.0424 | 0.08868 | 0.2632 |
| 26 | 11 | 1 | 0.1389 | 0.0408 | 0.07814 | 0.2469 |
| 27 | 10 | 2 | 0.1111 | 0.037 | 0.05781 | 0.2135 |
| 28 | 8 | 1 | 0.0972 | 0.0349 | 0.04809 | 0.1965 |
| 32 | 7 | 1 | 0.0833 | 0.0326 | 0.03874 | 0.1793 |
| 33 | 6 | 1 | 0.0694 | 0.03 | 0.02981 | 0.1618 |
| 34 | 5 | 1 | 0.0556 | 0.027 | 0.02143 | 0.144 |
| 63 | 4 | 1 | 0.0417 | 0.0235 | 0.01376 | 0.1261 |
| 65 | 3 | 1 | 0.0278 | 0.0194 | 0.00708 | 0.1089 |
| 66 | 2 | 1 | 0.0139 | 0.0138 | 0.00198 | 0.0973 |
| 67 | 1 | 1 | 0 | NaN | NA | NA |

**Table S73.** Foca station Kaplan-Meier drought risk estimates according to SPEI-3, 6, and 12

| Drought Risk (SPEI3) | | Drought Risk (SPEI6) | | Drought Risk (SPEI12) | |
| --- | --- | --- | --- | --- | --- |
| Time | Drought Risk | Time | Drought Risk | Time | Drought Risk |
| 0 | 0.0123 | 0 | 0.0118 | 0 | 0.0139 |
| 1 | 0.1235 | 1 | 0.1059 | 1 | 0.0833 |
| 2 | 0.1852 | 2 | 0.1647 | 2 | 0.125 |
| 3 | 0.2963 | 3 | 0.2 | 3 | 0.1667 |
| 4 | 0.3457 | 4 | 0.2235 | 4 | 0.2222 |
| 5 | 0.4198 | 5 | 0.2471 | 5 | 0.2639 |
| 6 | 0.4815 | 6 | 0.3176 | 6 | 0.3056 |
| 7 | 0.5679 | 7 | 0.4 | 7 | 0.3611 |
| 8 | 0.6049 | 8 | 0.4353 | 8 | 0.3889 |
| 9 | 0.6543 | 9 | 0.4941 | 9 | 0.4028 |
| 10 | 0.716 | 10 | 0.5529 | 10 | 0.4306 |
| 11 | 0.7654 | 11 | 0.6118 | 11 | 0.4444 |
| 12 | 0.8025 | 12 | 0.6706 | 12 | 0.4861 |
| 14 | 0.8148 | 13 | 0.7176 | 13 | 0.5 |
| 15 | 0.8395 | 14 | 0.7412 | 14 | 0.5139 |
| 16 | 0.8642 | 18 | 0.7529 | 15 | 0.5417 |
| 17 | 0.9136 | 19 | 0.7765 | 16 | 0.5833 |
| 18 | 0.9259 | 20 | 0.7882 | 17 | 0.625 |
| 20 | 0.9383 | 22 | 0.8 | 18 | 0.6667 |
| 21 | 0.9506 | 23 | 0.8235 | 19 | 0.7083 |
| 38 | 0.963 | 24 | 0.8471 | 20 | 0.7639 |
| 39 | 0.9753 | 26 | 0.8588 | 21 | 0.7917 |
| 40 | 0.9877 | 27 | 0.8706 | 22 | 0.8056 |
| 41 | 1 | 28 | 0.8824 | 23 | 0.8194 |
|  |  | 29 | 0.8941 | 24 | 0.8333 |
|  |  | 38 | 0.9059 | 25 | 0.8472 |
|  |  | 39 | 0.9176 | 26 | 0.8611 |
|  |  | 40 | 0.9294 | 27 | 0.8889 |
|  |  | 41 | 0.9412 | 28 | 0.9028 |
|  |  | 42 | 0.9529 | 32 | 0.9167 |
|  |  | 63 | 0.9647 | 33 | 0.9306 |
|  |  | 64 | 0.9765 | 34 | 0.9444 |
|  |  | 65 | 0.9882 | 63 | 0.9583 |
|  |  | 66 | 1 | 65 | 0.9722 |
|  |  |  |  | 66 | 0.9861 |
|  |  |  |  | 67 | 1 |

**Table S74.** Gediz station Kaplan-Meier survival estimates according to SPI-3

| Kaplan-Meier Wet to Dry (SPI3) | | | | | | |
| --- | --- | --- | --- | --- | --- | --- |
|  |  | n | events | median | 0.95LCL | 0.95UCL |
|  |  | 106 | 106 | 7 | 6 | 9 |
| time | n.risk | n.event | survival | std.err | lower 95% CL | upper 95% CL |
| 1 | 106 | 6 | 0.9434 | 0.02244 | 0.90042 | 0.9884 |
| 2 | 100 | 5 | 0.89623 | 0.02962 | 0.84001 | 0.9562 |
| 3 | 95 | 6 | 0.83962 | 0.03564 | 0.77259 | 0.9125 |
| 4 | 89 | 11 | 0.73585 | 0.04282 | 0.65653 | 0.8248 |
| 5 | 78 | 11 | 0.63208 | 0.04684 | 0.54663 | 0.7309 |
| 6 | 67 | 10 | 0.53774 | 0.04843 | 0.45073 | 0.6415 |
| 7 | 57 | 5 | 0.49057 | 0.04856 | 0.40406 | 0.5956 |
| 8 | 52 | 7 | 0.42453 | 0.04801 | 0.34013 | 0.5299 |
| 9 | 45 | 8 | 0.34906 | 0.0463 | 0.26915 | 0.4527 |
| 10 | 37 | 7 | 0.28302 | 0.04375 | 0.20904 | 0.3832 |
| 11 | 30 | 5 | 0.23585 | 0.04123 | 0.16742 | 0.3322 |
| 13 | 25 | 3 | 0.20755 | 0.03939 | 0.14308 | 0.3011 |
| 16 | 22 | 1 | 0.19811 | 0.03871 | 0.13508 | 0.2906 |
| 17 | 21 | 2 | 0.17925 | 0.03725 | 0.11927 | 0.2694 |
| 18 | 19 | 2 | 0.16038 | 0.03564 | 0.10375 | 0.2479 |
| 20 | 17 | 2 | 0.14151 | 0.03385 | 0.08854 | 0.2262 |
| 21 | 15 | 2 | 0.12264 | 0.03186 | 0.07371 | 0.2041 |
| 22 | 13 | 2 | 0.10377 | 0.02962 | 0.05931 | 0.1816 |
| 23 | 11 | 2 | 0.08491 | 0.02707 | 0.04545 | 0.1586 |
| 24 | 9 | 1 | 0.07547 | 0.02566 | 0.03876 | 0.1469 |
| 25 | 8 | 1 | 0.06604 | 0.02412 | 0.03228 | 0.1351 |
| 26 | 7 | 3 | 0.03774 | 0.01851 | 0.01443 | 0.0987 |
| 29 | 4 | 2 | 0.01887 | 0.01322 | 0.00478 | 0.0745 |
| 31 | 2 | 1 | 0.00943 | 0.00939 | 0.00134 | 0.0664 |
| 32 | 1 | 1 | 0 | NaN | NA | NA |

**Table S75.** Gediz station Kaplan-Meier survival estimates according to SPI-6

| Kaplan-Meier Wet to Dry (SPI6) | | | | | | |
| --- | --- | --- | --- | --- | --- | --- |
|  |  | n | events | median | 0.95LCL | 0.95UCL |
|  |  | 95 | 95 | 10 | 8 | 12 |
| time | n.risk | n.event | survival | std.err | lower 95% CL | upper 95% CL |
| 1 | 95 | 1 | 0.9895 | 0.0105 | 0.96916 | 1 |
| 2 | 94 | 6 | 0.9263 | 0.0268 | 0.87524 | 0.9804 |
| 3 | 88 | 4 | 0.8842 | 0.0328 | 0.82215 | 0.951 |
| 4 | 84 | 4 | 0.8421 | 0.0374 | 0.77188 | 0.9187 |
| 5 | 80 | 4 | 0.8 | 0.041 | 0.72348 | 0.8846 |
| 6 | 76 | 5 | 0.7474 | 0.0446 | 0.66491 | 0.8401 |
| 7 | 71 | 8 | 0.6632 | 0.0485 | 0.57461 | 0.7653 |
| 8 | 63 | 8 | 0.5789 | 0.0507 | 0.48771 | 0.6873 |
| 9 | 55 | 6 | 0.5158 | 0.0513 | 0.42448 | 0.6267 |
| 10 | 49 | 5 | 0.4632 | 0.0512 | 0.373 | 0.5751 |
| 11 | 44 | 4 | 0.4211 | 0.0507 | 0.33261 | 0.533 |
| 12 | 40 | 4 | 0.3789 | 0.0498 | 0.29294 | 0.4902 |
| 13 | 36 | 3 | 0.3474 | 0.0489 | 0.26369 | 0.4576 |
| 14 | 33 | 4 | 0.3053 | 0.0472 | 0.22539 | 0.4134 |
| 15 | 29 | 2 | 0.2842 | 0.0463 | 0.20656 | 0.3911 |
| 16 | 27 | 3 | 0.2526 | 0.0446 | 0.17876 | 0.357 |
| 17 | 24 | 2 | 0.2316 | 0.0433 | 0.16055 | 0.334 |
| 18 | 22 | 4 | 0.1895 | 0.0402 | 0.125 | 0.2872 |
| 19 | 18 | 2 | 0.1684 | 0.0384 | 0.10773 | 0.2633 |
| 20 | 16 | 1 | 0.1579 | 0.0374 | 0.09924 | 0.2512 |
| 21 | 15 | 1 | 0.1474 | 0.0364 | 0.09085 | 0.239 |
| 22 | 14 | 1 | 0.1368 | 0.0353 | 0.08258 | 0.2268 |
| 23 | 13 | 2 | 0.1158 | 0.0328 | 0.06643 | 0.2018 |
| 24 | 11 | 2 | 0.0947 | 0.03 | 0.05088 | 0.1764 |
| 25 | 9 | 1 | 0.0842 | 0.0285 | 0.04339 | 0.1634 |
| 30 | 8 | 1 | 0.0737 | 0.0268 | 0.03612 | 0.1503 |
| 32 | 7 | 1 | 0.0632 | 0.025 | 0.02911 | 0.137 |
| 33 | 6 | 1 | 0.0526 | 0.0229 | 0.02242 | 0.1235 |
| 39 | 5 | 1 | 0.0421 | 0.0206 | 0.01614 | 0.1099 |
| 43 | 4 | 1 | 0.0316 | 0.0179 | 0.01037 | 0.0962 |
| 55 | 3 | 1 | 0.0211 | 0.0147 | 0.00534 | 0.083 |
| 80 | 2 | 1 | 0.0105 | 0.0105 | 0.0015 | 0.074 |
| 89 | 1 | 1 | 0 | NaN | NA | NA |

**Table S76.** Gediz station Kaplan-Meier survival estimates according to SPI-12

| Kaplan-Meier Wet to Dry (SPI12) | | | | | | |
| --- | --- | --- | --- | --- | --- | --- |
|  |  | n | events | median | 0.95LCL | 0.95UCL |
|  |  | 94 | 94 | 16 | 13 | 19 |
| time | n.risk | n.event | survival | std.err | lower 95% CL | upper 95% CL |
| 0 | 94 | 1 | 0.9894 | 0.0106 | 0.96884 | 1 |
| 1 | 93 | 5 | 0.9362 | 0.0252 | 0.88804 | 0.9869 |
| 2 | 88 | 6 | 0.8723 | 0.0344 | 0.80742 | 0.9425 |
| 3 | 82 | 5 | 0.8191 | 0.0397 | 0.74492 | 0.9008 |
| 4 | 77 | 2 | 0.7979 | 0.0414 | 0.72068 | 0.8833 |
| 5 | 75 | 3 | 0.766 | 0.0437 | 0.68497 | 0.8565 |
| 6 | 72 | 2 | 0.7447 | 0.045 | 0.66155 | 0.8383 |
| 7 | 70 | 2 | 0.7234 | 0.0461 | 0.6384 | 0.8197 |
| 8 | 68 | 2 | 0.7021 | 0.0472 | 0.61551 | 0.8009 |
| 9 | 66 | 3 | 0.6702 | 0.0485 | 0.5816 | 0.7723 |
| 10 | 63 | 3 | 0.6383 | 0.0496 | 0.54819 | 0.7432 |
| 11 | 60 | 1 | 0.6277 | 0.0499 | 0.53716 | 0.7334 |
| 12 | 59 | 2 | 0.6064 | 0.0504 | 0.51524 | 0.7136 |
| 13 | 57 | 3 | 0.5745 | 0.051 | 0.48273 | 0.6836 |
| 14 | 54 | 3 | 0.5426 | 0.0514 | 0.45064 | 0.6532 |
| 15 | 51 | 3 | 0.5106 | 0.0516 | 0.41895 | 0.6224 |
| 16 | 48 | 3 | 0.4787 | 0.0515 | 0.38768 | 0.5912 |
| 17 | 45 | 3 | 0.4468 | 0.0513 | 0.35681 | 0.5595 |
| 18 | 42 | 3 | 0.4149 | 0.0508 | 0.32634 | 0.5275 |
| 19 | 39 | 3 | 0.383 | 0.0501 | 0.2963 | 0.495 |
| 20 | 36 | 2 | 0.3617 | 0.0496 | 0.27652 | 0.4731 |
| 21 | 34 | 2 | 0.3404 | 0.0489 | 0.25693 | 0.4511 |
| 22 | 32 | 3 | 0.3085 | 0.0476 | 0.22795 | 0.4176 |
| 23 | 29 | 3 | 0.2766 | 0.0461 | 0.19946 | 0.3836 |
| 24 | 26 | 3 | 0.2447 | 0.0443 | 0.17153 | 0.349 |
| 25 | 23 | 2 | 0.2234 | 0.043 | 0.15325 | 0.3257 |
| 26 | 21 | 2 | 0.2021 | 0.0414 | 0.13527 | 0.302 |
| 27 | 19 | 2 | 0.1809 | 0.0397 | 0.11762 | 0.2781 |
| 28 | 17 | 1 | 0.1702 | 0.0388 | 0.10893 | 0.266 |
| 29 | 16 | 1 | 0.1596 | 0.0378 | 0.10034 | 0.2538 |
| 30 | 15 | 1 | 0.1489 | 0.0367 | 0.09186 | 0.2415 |
| 31 | 14 | 1 | 0.1383 | 0.0356 | 0.0835 | 0.2291 |
| 32 | 13 | 1 | 0.1277 | 0.0344 | 0.07526 | 0.2165 |
| 35 | 12 | 1 | 0.117 | 0.0332 | 0.06716 | 0.2039 |
| 56 | 11 | 1 | 0.1064 | 0.0318 | 0.05921 | 0.1911 |
| 87 | 10 | 1 | 0.0957 | 0.0303 | 0.05144 | 0.1782 |
| 88 | 9 | 1 | 0.0851 | 0.0288 | 0.04386 | 0.1651 |
| 89 | 8 | 1 | 0.0745 | 0.0271 | 0.03651 | 0.1519 |
| 90 | 7 | 1 | 0.0638 | 0.0252 | 0.02943 | 0.1384 |
| 91 | 6 | 1 | 0.0532 | 0.0231 | 0.02267 | 0.1248 |
| 92 | 5 | 1 | 0.0426 | 0.0208 | 0.01631 | 0.111 |
| 93 | 4 | 1 | 0.0319 | 0.0181 | 0.01048 | 0.0972 |
| 94 | 3 | 1 | 0.0213 | 0.0149 | 0.0054 | 0.0838 |
| 301 | 2 | 1 | 0.0106 | 0.0106 | 0.00151 | 0.0747 |
| 302 | 1 | 1 | 0 | NaN | NA | NA |

**Table S77.** Gediz station Kaplan-Meier drought risk estimates according to SPI-3, 6, and 12

| Drought Risk (SPI3) | | Drought Risk (SPI6) | | Drought Risk (SPI12) | |
| --- | --- | --- | --- | --- | --- |
| Time | Drought Risk | Time | Drought Risk | Time | Drought Risk |
| 1 | 0.0566 | 1 | 0.0105 | 0 | 0.0106 |
| 2 | 0.10377 | 2 | 0.0737 | 1 | 0.0638 |
| 3 | 0.16038 | 3 | 0.1158 | 2 | 0.1277 |
| 4 | 0.26415 | 4 | 0.1579 | 3 | 0.1809 |
| 5 | 0.36792 | 5 | 0.2 | 4 | 0.2021 |
| 6 | 0.46226 | 6 | 0.2526 | 5 | 0.234 |
| 7 | 0.50943 | 7 | 0.3368 | 6 | 0.2553 |
| 8 | 0.57547 | 8 | 0.4211 | 7 | 0.2766 |
| 9 | 0.65094 | 9 | 0.4842 | 8 | 0.2979 |
| 10 | 0.71698 | 10 | 0.5368 | 9 | 0.3298 |
| 11 | 0.76415 | 11 | 0.5789 | 10 | 0.3617 |
| 12 | 0.73666 | 12 | 0.6211 | 11 | 0.3723 |
| 13 | 0.79245 | 13 | 0.6526 | 12 | 0.3936 |
| 16 | 0.80189 | 14 | 0.6947 | 13 | 0.4255 |
| 17 | 0.82075 | 15 | 0.7158 | 14 | 0.4574 |
| 18 | 0.83962 | 16 | 0.7474 | 15 | 0.4894 |
| 20 | 0.85849 | 17 | 0.7684 | 16 | 0.5213 |
| 21 | 0.87736 | 18 | 0.8105 | 17 | 0.5532 |
| 22 | 0.89623 | 19 | 0.8316 | 18 | 0.5851 |
| 23 | 0.91509 | 20 | 0.8421 | 19 | 0.617 |
| 24 | 0.92453 | 21 | 0.8526 | 20 | 0.6383 |
| 25 | 0.93396 | 22 | 0.8632 | 21 | 0.6596 |
| 26 | 0.96226 | 23 | 0.8842 | 22 | 0.6915 |
| 29 | 0.98113 | 24 | 0.9053 | 23 | 0.7234 |
| 31 | 0.99057 | 25 | 0.9158 | 24 | 0.7553 |
| 32 | 1 | 30 | 0.9263 | 25 | 0.7766 |
|  |  | 32 | 0.9368 | 26 | 0.7979 |
|  |  | 33 | 0.9474 | 27 | 0.8191 |
|  |  | 39 | 0.9579 | 28 | 0.8298 |
|  |  | 43 | 0.9684 | 29 | 0.8404 |
|  |  | 55 | 0.9789 | 30 | 0.8511 |
|  |  | 80 | 0.9895 | 31 | 0.8617 |
|  |  | 89 | 1 | 32 | 0.8723 |
|  |  |  |  | 35 | 0.883 |
|  |  |  |  | 56 | 0.8936 |
|  |  |  |  | 87 | 0.9043 |
|  |  |  |  | 88 | 0.9149 |
|  |  |  |  | 89 | 0.9255 |
|  |  |  |  | 90 | 0.9362 |
|  |  |  |  | 91 | 0.9468 |
|  |  |  |  | 92 | 0.9574 |
|  |  |  |  | 93 | 0.9681 |
|  |  |  |  | 94 | 0.9787 |
|  |  |  |  | 301 | 0.9894 |
|  |  |  |  | 302 | 1 |

**Table S78.** Gediz station Kaplan-Meier survival estimates according to SPEI-3

| Kaplan-Meier Wet to Dry (SPEI3) | | | | | | |
| --- | --- | --- | --- | --- | --- | --- |
|  |  | n | events | median | 0.95LCL | 0.95UCL |
|  |  | 115 | 115 | 9 | 9 | 10 |
| time | n.risk | n.event | survival | std.err | lower 95% CI | upper 95% CI |
| 1 | 115 | 3 | 0.9739 | 0.01486 | 0.94521 | 10.000 |
| 2 | 112 | 4 | 0.9391 | 0.0223 | 0.89643 | 0.9839 |
| 3 | 108 | 2 | 0.9217 | 0.02505 | 0.87394 | 0.9722 |
| 4 | 106 | 2 | 0.9043 | 0.02743 | 0.85216 | 0.9597 |
| 5 | 104 | 4 | 0.8696 | 0.03141 | 0.81014 | 0.9333 |
| 6 | 100 | 5 | 0.8261 | 0.03535 | 0.75964 | 0.8983 |
| 7 | 95 | 10 | 0.7391 | 0.04095 | 0.66308 | 0.8239 |
| 8 | 85 | 14 | 0.6174 | 0.04532 | 0.53466 | 0.7129 |
| 9 | 71 | 15 | 0.487 | 0.04661 | 0.40366 | 0.5874 |
| 10 | 56 | 12 | 0.3826 | 0.04532 | 0.30334 | 0.4826 |
| 11 | 44 | 12 | 0.2783 | 0.04179 | 0.20731 | 0.3735 |
| 12 | 32 | 6 | 0.2261 | 0.03901 | 0.16122 | 0.3171 |
| 13 | 26 | 2 | 0.2087 | 0.03789 | 0.1462 | 0.2979 |
| 14 | 24 | 3 | 0.1826 | 0.03603 | 0.12405 | 0.2688 |
| 15 | 21 | 4 | 0.1478 | 0.0331 | 0.09532 | 0.2293 |
| 16 | 17 | 3 | 0.1217 | 0.03049 | 0.07451 | 0.1989 |
| 17 | 14 | 2 | 0.1043 | 0.02851 | 0.06109 | 0.1783 |
| 20 | 12 | 1 | 0.0957 | 0.02743 | 0.05453 | 0.1678 |
| 21 | 11 | 2 | 0.0783 | 0.02505 | 0.0418 | 0.1465 |
| 22 | 9 | 1 | 0.0696 | 0.02372 | 0.03565 | 0.1357 |
| 23 | 8 | 1 | 0.0609 | 0.0223 | 0.02969 | 0.1248 |
| 24 | 7 | 1 | 0.0522 | 0.02074 | 0.02394 | 0.1137 |
| 25 | 6 | 1 | 0.0435 | 0.01902 | 0.01845 | 0.1025 |
| 32 | 5 | 1 | 0.0348 | 0.01709 | 0.01328 | 0.0911 |
| 36 | 4 | 1 | 0.0261 | 0.01486 | 0.00854 | 0.0797 |
| 37 | 3 | 1 | 0.0174 | 0.01219 | 0.0044 | 0.0687 |
| 42 | 2 | 1 | 0.0087 | 0.00866 | 0.00124 | 0.0612 |
| 67 | 1 | 1 | 0 | NaN | NA | NA |

**Table S79.** Gediz station Kaplan-Meier survival estimates according to SPEI-6

| Kaplan-Meier Wet to Dry (SPEI6) | | | | | | |
| --- | --- | --- | --- | --- | --- | --- |
|  |  | n | events | median | 0.95LCL | 0.95UCL |
|  |  | 104 | 104 | 10.5 | 9 | 12 |
| time | n.risk | n.event | survival | std.err | lower 95% CI | upper 95% CI |
| 1 | 104 | 1 | 0.99038 | 0.00957 | 0.97181 | 10.000 |
| 2 | 103 | 2 | 0.97115 | 0.01641 | 0.93951 | 10.000 |
| 3 | 101 | 3 | 0.94231 | 0.02286 | 0.89855 | 0.9882 |
| 4 | 98 | 2 | 0.92308 | 0.02613 | 0.87326 | 0.9757 |
| 5 | 96 | 4 | 0.88462 | 0.03133 | 0.8253 | 0.9482 |
| 6 | 92 | 5 | 0.83654 | 0.03626 | 0.7684 | 0.9107 |
| 7 | 87 | 10 | 0.74038 | 0.04299 | 0.66074 | 0.8296 |
| 8 | 77 | 9 | 0.65385 | 0.04665 | 0.56852 | 0.752 |
| 9 | 68 | 8 | 0.57692 | 0.04845 | 0.48937 | 0.6801 |
| 10 | 60 | 8 | 0.5 | 0.04903 | 0.41257 | 0.606 |
| 11 | 52 | 10 | 0.40385 | 0.04811 | 0.31975 | 0.5101 |
| 12 | 42 | 6 | 0.34615 | 0.04665 | 0.2658 | 0.4508 |
| 13 | 36 | 3 | 0.31731 | 0.04564 | 0.23936 | 0.4206 |
| 14 | 33 | 1 | 0.30769 | 0.04526 | 0.23063 | 0.4105 |
| 15 | 32 | 1 | 0.29808 | 0.04485 | 0.22194 | 0.4003 |
| 16 | 31 | 2 | 0.27885 | 0.04397 | 0.20471 | 0.3798 |
| 17 | 29 | 1 | 0.26923 | 0.04349 | 0.19616 | 0.3695 |
| 18 | 28 | 2 | 0.25 | 0.04246 | 0.17921 | 0.3487 |
| 19 | 26 | 3 | 0.22115 | 0.0407 | 0.15419 | 0.3172 |
| 20 | 23 | 2 | 0.20192 | 0.03936 | 0.1378 | 0.2959 |
| 21 | 21 | 2 | 0.18269 | 0.03789 | 0.12167 | 0.2743 |
| 22 | 19 | 3 | 0.15385 | 0.03538 | 0.09803 | 0.2415 |
| 23 | 16 | 1 | 0.14423 | 0.03445 | 0.09031 | 0.2303 |
| 24 | 15 | 2 | 0.125 | 0.03243 | 0.07518 | 0.2078 |
| 25 | 13 | 1 | 0.11538 | 0.03133 | 0.06777 | 0.1965 |
| 36 | 12 | 1 | 0.10577 | 0.03016 | 0.06049 | 0.185 |
| 37 | 11 | 1 | 0.09615 | 0.02891 | 0.05334 | 0.1733 |
| 38 | 10 | 1 | 0.08654 | 0.02757 | 0.04635 | 0.1616 |
| 39 | 9 | 1 | 0.07692 | 0.02613 | 0.03953 | 0.1497 |
| 40 | 8 | 1 | 0.06731 | 0.02457 | 0.03291 | 0.1376 |
| 44 | 7 | 1 | 0.05769 | 0.02286 | 0.02653 | 0.1254 |
| 45 | 6 | 1 | 0.04808 | 0.02098 | 0.02044 | 0.1131 |
| 46 | 5 | 1 | 0.03846 | 0.01886 | 0.01471 | 0.1005 |
| 47 | 4 | 1 | 0.02885 | 0.01641 | 0.00946 | 0.088 |
| 48 | 3 | 1 | 0.01923 | 0.01347 | 0.00487 | 0.0759 |
| 118 | 2 | 1 | 0.00962 | 0.00957 | 0.00137 | 0.0676 |
| 119 | 1 | 1 | 0 | NaN | NA | NA |

**Table S80.** Gediz station Kaplan-Meier survival estimates according to SPEI-12

| Kaplan-Meier Wet to Dry (SPEI12) | | | | | | |
| --- | --- | --- | --- | --- | --- | --- |
|  |  | n | events | median | 0.95LCL | 0.95UCL |
|  |  | 103 | 103 | 12 | 8 | 18 |
| time | n.risk | n.event | survival | std.err | lower 95% CI | upper 95% CI |
| 0 | 103 | 1 | 0.99029 | 0.00966 | 0.97153 | 10.000 |
| 1 | 102 | 8 | 0.91262 | 0.02782 | 0.85968 | 0.9688 |
| 2 | 94 | 7 | 0.84466 | 0.03569 | 0.77752 | 0.9176 |
| 3 | 87 | 8 | 0.76699 | 0.04165 | 0.68954 | 0.8531 |
| 4 | 79 | 7 | 0.69903 | 0.0452 | 0.61583 | 0.7935 |
| 5 | 72 | 3 | 0.6699 | 0.04633 | 0.58497 | 0.7672 |
| 6 | 69 | 3 | 0.64078 | 0.04727 | 0.55451 | 0.7405 |
| 7 | 66 | 3 | 0.61165 | 0.04802 | 0.52441 | 0.7134 |
| 8 | 63 | 3 | 0.58252 | 0.04859 | 0.49467 | 0.686 |
| 9 | 60 | 3 | 0.5534 | 0.04898 | 0.46526 | 0.6582 |
| 10 | 57 | 3 | 0.52427 | 0.04921 | 0.43618 | 0.6302 |
| 11 | 54 | 2 | 0.50485 | 0.04926 | 0.41697 | 0.6113 |
| 12 | 52 | 1 | 0.49515 | 0.04926 | 0.40742 | 0.6018 |
| 13 | 51 | 2 | 0.47573 | 0.04921 | 0.38843 | 0.5826 |
| 14 | 49 | 2 | 0.45631 | 0.04908 | 0.36958 | 0.5634 |
| 15 | 47 | 2 | 0.43689 | 0.04887 | 0.35088 | 0.544 |
| 16 | 45 | 2 | 0.41748 | 0.04859 | 0.33232 | 0.5245 |
| 17 | 43 | 2 | 0.39806 | 0.04823 | 0.31391 | 0.5048 |
| 18 | 41 | 1 | 0.38835 | 0.04802 | 0.30476 | 0.4949 |
| 19 | 40 | 1 | 0.37864 | 0.04779 | 0.29566 | 0.4849 |
| 20 | 39 | 1 | 0.36893 | 0.04754 | 0.28658 | 0.4749 |
| 21 | 38 | 3 | 0.33981 | 0.04667 | 0.25961 | 0.4448 |
| 22 | 35 | 3 | 0.31068 | 0.0456 | 0.23301 | 0.4142 |
| 23 | 32 | 2 | 0.29126 | 0.04477 | 0.2155 | 0.3937 |
| 24 | 30 | 3 | 0.26214 | 0.04333 | 0.18959 | 0.3624 |
| 25 | 27 | 3 | 0.23301 | 0.04165 | 0.16414 | 0.3308 |
| 26 | 24 | 2 | 0.21359 | 0.04038 | 0.14745 | 0.3094 |
| 27 | 22 | 2 | 0.19417 | 0.03898 | 0.13102 | 0.2878 |
| 28 | 20 | 2 | 0.17476 | 0.03742 | 0.11486 | 0.2659 |
| 29 | 18 | 1 | 0.16505 | 0.03658 | 0.1069 | 0.2548 |
| 30 | 17 | 1 | 0.15534 | 0.03569 | 0.09902 | 0.2437 |
| 31 | 16 | 2 | 0.13592 | 0.03377 | 0.08353 | 0.2212 |
| 32 | 14 | 2 | 0.1165 | 0.03161 | 0.06845 | 0.1983 |
| 33 | 12 | 1 | 0.1068 | 0.03043 | 0.06109 | 0.1867 |
| 35 | 11 | 1 | 0.09709 | 0.02917 | 0.05388 | 0.175 |
| 81 | 10 | 1 | 0.08738 | 0.02782 | 0.04681 | 0.1631 |
| 82 | 9 | 1 | 0.07767 | 0.02637 | 0.03992 | 0.1511 |
| 83 | 8 | 1 | 0.06796 | 0.0248 | 0.03324 | 0.139 |
| 84 | 7 | 1 | 0.05825 | 0.02308 | 0.0268 | 0.1266 |
| 85 | 6 | 1 | 0.04854 | 0.02118 | 0.02065 | 0.1141 |
| 86 | 5 | 1 | 0.03883 | 0.01904 | 0.01486 | 0.1015 |
| 87 | 4 | 1 | 0.02913 | 0.01657 | 0.00955 | 0.0888 |
| 88 | 3 | 1 | 0.01942 | 0.0136 | 0.00492 | 0.0766 |
| 133 | 2 | 1 | 0.00971 | 0.00966 | 0.00138 | 0.0683 |
| 187 | 1 | 1 | 0 | NaN | NA | NA |

**Table S81.** Gediz station Kaplan-Meier drought risk estimates according to SPEI-3, 6, and 12

| Drought Risk (SPEI3) | | Drought Risk (SPEI6) | | Drought Risk (SPEI12) | |
| --- | --- | --- | --- | --- | --- |
| Time | Drought Risk | Time | Drought Risk | Time | Drought Risk |
| 1 | 0.0261 | 1 | 0.00962 | 0 | 0.00971 |
| 2 | 0.0609 | 2 | 0.02885 | 1 | 0.08738 |
| 3 | 0.0783 | 3 | 0.05769 | 2 | 0.15534 |
| 4 | 0.0957 | 4 | 0.07692 | 3 | 0.23301 |
| 5 | 0.1304 | 5 | 0.11538 | 4 | 0.30097 |
| 6 | 0.1739 | 6 | 0.16346 | 5 | 0.3301 |
| 7 | 0.2609 | 7 | 0.25962 | 6 | 0.35922 |
| 8 | 0.3826 | 8 | 0.34615 | 7 | 0.38835 |
| 9 | 0.513 | 9 | 0.42308 | 8 | 0.41748 |
| 10 | 0.6174 | 10 | 0.5 | 9 | 0.4466 |
| 11 | 0.7217 | 11 | 0.59615 | 10 | 0.47573 |
| 12 | 0.7739 | 12 | 0.65385 | 11 | 0.49515 |
| 13 | 0.7913 | 13 | 0.68269 | 12 | 0.50485 |
| 14 | 0.8174 | 14 | 0.69231 | 13 | 0.52427 |
| 15 | 0.8522 | 15 | 0.70192 | 14 | 0.54369 |
| 16 | 0.8783 | 16 | 0.72115 | 15 | 0.56311 |
| 17 | 0.8957 | 17 | 0.73077 | 16 | 0.58252 |
| 20 | 0.9043 | 18 | 0.75 | 17 | 0.60194 |
| 21 | 0.9217 | 19 | 0.77885 | 18 | 0.61165 |
| 22 | 0.9304 | 20 | 0.79808 | 19 | 0.62136 |
| 23 | 0.9391 | 21 | 0.81731 | 20 | 0.63107 |
| 24 | 0.9478 | 22 | 0.84615 | 21 | 0.66019 |
| 25 | 0.9565 | 23 | 0.85577 | 22 | 0.68932 |
| 32 | 0.9652 | 24 | 0.875 | 23 | 0.70874 |
| 36 | 0.9739 | 25 | 0.88462 | 24 | 0.73786 |
| 37 | 0.9826 | 36 | 0.89423 | 25 | 0.76699 |
| 42 | 0.9913 | 37 | 0.90385 | 26 | 0.78641 |
| 67 | 1 | 38 | 0.91346 | 27 | 0.80583 |
|  |  | 39 | 0.92308 | 28 | 0.82524 |
|  |  | 40 | 0.93269 | 29 | 0.83495 |
|  |  | 44 | 0.94231 | 30 | 0.84466 |
|  |  | 45 | 0.95192 | 31 | 0.86408 |
|  |  | 46 | 0.96154 | 32 | 0.8835 |
|  |  | 47 | 0.97115 | 33 | 0.8932 |
|  |  | 48 | 0.98077 | 35 | 0.90291 |
|  |  | 118 | 0.99038 | 81 | 0.91262 |
|  |  | 119 | 1 | 82 | 0.92233 |
|  |  |  |  | 83 | 0.93204 |
|  |  |  |  | 84 | 0.94175 |
|  |  |  |  | 85 | 0.95146 |
|  |  |  |  | 86 | 0.96117 |
|  |  |  |  | 87 | 0.97087 |
|  |  |  |  | 88 | 0.98058 |
|  |  |  |  | 133 | 0.99029 |
|  |  |  |  | 187 | 1 |

**Table S82.** Golmarmara station Kaplan-Meier survival estimates according to SPI-3

| Kaplan-Meier Wet to Dry (SPI3) | | | | | | |
| --- | --- | --- | --- | --- | --- | --- |
|  |  | n | events | median | 0.95LCL | 0.95UCL |
|  |  | 75 | 75 | 8 | 6 | 10 |
| time | n.risk | n.event | survival | std.err | lower 95% CL | upper 95% CL |
| 1 | 75 | 5 | 0.9333 | 0.0288 | 0.87855 | 0.9915 |
| 2 | 70 | 2 | 0.9067 | 0.0336 | 0.84316 | 0.975 |
| 3 | 68 | 9 | 0.7867 | 0.0473 | 0.69921 | 0.8851 |
| 4 | 59 | 7 | 0.6933 | 0.0532 | 0.59645 | 0.806 |
| 5 | 52 | 2 | 0.6667 | 0.0544 | 0.56808 | 0.7824 |
| 6 | 50 | 6 | 0.5867 | 0.0569 | 0.48517 | 0.7094 |
| 7 | 44 | 6 | 0.5067 | 0.0577 | 0.40526 | 0.6334 |
| 8 | 38 | 4 | 0.4533 | 0.0575 | 0.35358 | 0.5812 |
| 9 | 34 | 4 | 0.4 | 0.0566 | 0.30317 | 0.5278 |
| 10 | 30 | 4 | 0.3467 | 0.055 | 0.25409 | 0.473 |
| 11 | 26 | 2 | 0.32 | 0.0539 | 0.23008 | 0.4451 |
| 12 | 24 | 1 | 0.3067 | 0.0532 | 0.21821 | 0.431 |
| 13 | 23 | 3 | 0.2667 | 0.0511 | 0.18322 | 0.3881 |
| 14 | 20 | 2 | 0.24 | 0.0493 | 0.16044 | 0.359 |
| 15 | 18 | 4 | 0.1867 | 0.045 | 0.11639 | 0.2994 |
| 16 | 14 | 3 | 0.1467 | 0.0409 | 0.08497 | 0.2532 |
| 17 | 11 | 1 | 0.1333 | 0.0393 | 0.07488 | 0.2374 |
| 18 | 10 | 2 | 0.1067 | 0.0356 | 0.05541 | 0.2053 |
| 20 | 8 | 1 | 0.0933 | 0.0336 | 0.0461 | 0.189 |
| 21 | 7 | 2 | 0.0667 | 0.0288 | 0.02859 | 0.1555 |
| 25 | 5 | 1 | 0.0533 | 0.0259 | 0.02055 | 0.1384 |
| 30 | 4 | 1 | 0.04 | 0.0226 | 0.0132 | 0.1212 |
| 31 | 3 | 1 | 0.0267 | 0.0186 | 0.00679 | 0.1047 |
| 37 | 2 | 1 | 0.0133 | 0.0132 | 0.0019 | 0.0934 |
| 38 | 1 | 1 | 0 | NaN | NA | NA |

**Table S83.** Golmarmara station Kaplan-Meier survival estimates according to SPI-6

| Kaplan-Meier Wet to Dry (SPI6) | | | | | | |
| --- | --- | --- | --- | --- | --- | --- |
|  |  | n | events | median | 0.95LCL | 0.95UCL |
|  |  | 70 | 70 | 9.5 | 8 | 12 |
| time | n.risk | n.event | survival | std.err | lower 95% CL | upper 95% CL |
| 1 | 70 | 5 | 0.9286 | 0.0308 | 0.87016 | 0.991 |
| 2 | 65 | 4 | 0.8714 | 0.04 | 0.79644 | 0.953 |
| 3 | 61 | 4 | 0.8143 | 0.0465 | 0.7281 | 0.911 |
| 4 | 57 | 3 | 0.7714 | 0.0502 | 0.67907 | 0.876 |
| 5 | 54 | 3 | 0.7286 | 0.0532 | 0.6315 | 0.841 |
| 6 | 51 | 4 | 0.6714 | 0.0561 | 0.56994 | 0.791 |
| 7 | 47 | 4 | 0.6143 | 0.0582 | 0.51021 | 0.74 |
| 8 | 43 | 5 | 0.5429 | 0.0595 | 0.43785 | 0.673 |
| 9 | 38 | 3 | 0.5 | 0.0598 | 0.39558 | 0.632 |
| 10 | 35 | 4 | 0.4429 | 0.0594 | 0.34053 | 0.576 |
| 11 | 31 | 5 | 0.3714 | 0.0578 | 0.27386 | 0.504 |
| 12 | 26 | 2 | 0.3429 | 0.0567 | 0.24789 | 0.474 |
| 13 | 24 | 2 | 0.3143 | 0.0555 | 0.22236 | 0.444 |
| 14 | 22 | 1 | 0.3 | 0.0548 | 0.20976 | 0.429 |
| 15 | 21 | 1 | 0.2857 | 0.054 | 0.19727 | 0.414 |
| 16 | 20 | 1 | 0.2714 | 0.0532 | 0.18492 | 0.398 |
| 17 | 19 | 2 | 0.2429 | 0.0513 | 0.16059 | 0.367 |
| 18 | 17 | 2 | 0.2143 | 0.049 | 0.13683 | 0.336 |
| 19 | 15 | 2 | 0.1857 | 0.0465 | 0.11371 | 0.303 |
| 20 | 13 | 2 | 0.1571 | 0.0435 | 0.09134 | 0.27 |
| 21 | 11 | 1 | 0.1429 | 0.0418 | 0.08048 | 0.254 |
| 22 | 10 | 2 | 0.1143 | 0.038 | 0.05953 | 0.219 |
| 23 | 8 | 1 | 0.1 | 0.0359 | 0.04952 | 0.202 |
| 24 | 7 | 1 | 0.0857 | 0.0335 | 0.03988 | 0.184 |
| 25 | 6 | 1 | 0.0714 | 0.0308 | 0.03069 | 0.166 |
| 26 | 5 | 1 | 0.0571 | 0.0277 | 0.02206 | 0.148 |
| 41 | 4 | 1 | 0.0429 | 0.0242 | 0.01417 | 0.13 |
| 42 | 3 | 1 | 0.0286 | 0.0199 | 0.00729 | 0.112 |
| 43 | 2 | 1 | 0.0143 | 0.0142 | 0.00204 | 0.1 |
| 61 | 1 | 1 | 0 | NaN | NA | NA |

**Table S84.** Golmarmara station Kaplan-Meier survival estimates according to SPI-12

| Kaplan-Meier Wet to Dry (SPI12) | | | | | | |
| --- | --- | --- | --- | --- | --- | --- |
|  |  | n | events | median | 0.95LCL | 0.95UCL |
|  |  | 59 | 59 | 15 | 12 | 20 |
| time | n.risk | n.event | survival | std.err | lower 95% CL | upper 95% CL |
| 0 | 59 | 1 | 0.9831 | 0.0168 | 0.95066 | 1 |
| 1 | 58 | 2 | 0.9492 | 0.0286 | 0.89472 | 1 |
| 2 | 56 | 3 | 0.8983 | 0.0393 | 0.8244 | 0.979 |
| 3 | 53 | 1 | 0.8814 | 0.0421 | 0.80259 | 0.968 |
| 4 | 52 | 2 | 0.8475 | 0.0468 | 0.76051 | 0.944 |
| 5 | 50 | 2 | 0.8136 | 0.0507 | 0.72001 | 0.919 |
| 6 | 48 | 1 | 0.7966 | 0.0524 | 0.70025 | 0.906 |
| 7 | 47 | 1 | 0.7797 | 0.054 | 0.68076 | 0.893 |
| 8 | 46 | 2 | 0.7458 | 0.0567 | 0.64254 | 0.866 |
| 9 | 44 | 3 | 0.6949 | 0.0599 | 0.58682 | 0.823 |
| 10 | 41 | 1 | 0.678 | 0.0608 | 0.56863 | 0.808 |
| 11 | 40 | 1 | 0.661 | 0.0616 | 0.55062 | 0.794 |
| 12 | 39 | 3 | 0.6102 | 0.0635 | 0.49759 | 0.748 |
| 13 | 36 | 3 | 0.5593 | 0.0646 | 0.44596 | 0.701 |
| 14 | 33 | 2 | 0.5254 | 0.065 | 0.41228 | 0.67 |
| 15 | 31 | 2 | 0.4915 | 0.0651 | 0.37917 | 0.637 |
| 16 | 29 | 2 | 0.4576 | 0.0649 | 0.34663 | 0.604 |
| 17 | 27 | 2 | 0.4237 | 0.0643 | 0.31467 | 0.571 |
| 18 | 25 | 2 | 0.3898 | 0.0635 | 0.28329 | 0.536 |
| 19 | 23 | 2 | 0.3559 | 0.0623 | 0.25252 | 0.502 |
| 20 | 21 | 1 | 0.339 | 0.0616 | 0.23737 | 0.484 |
| 21 | 20 | 1 | 0.322 | 0.0608 | 0.22239 | 0.466 |
| 22 | 19 | 1 | 0.3051 | 0.0599 | 0.20757 | 0.448 |
| 23 | 18 | 2 | 0.2712 | 0.0579 | 0.17848 | 0.412 |
| 24 | 16 | 2 | 0.2373 | 0.0554 | 0.15018 | 0.375 |
| 72 | 14 | 1 | 0.2203 | 0.054 | 0.13634 | 0.356 |
| 96 | 13 | 1 | 0.2034 | 0.0524 | 0.12275 | 0.337 |
| 97 | 12 | 1 | 0.1864 | 0.0507 | 0.10941 | 0.318 |
| 135 | 11 | 1 | 0.1695 | 0.0488 | 0.09635 | 0.298 |
| 136 | 10 | 1 | 0.1525 | 0.0468 | 0.0836 | 0.278 |
| 137 | 9 | 1 | 0.1356 | 0.0446 | 0.07119 | 0.258 |
| 138 | 8 | 1 | 0.1186 | 0.0421 | 0.05918 | 0.238 |
| 139 | 7 | 1 | 0.1017 | 0.0393 | 0.04764 | 0.217 |
| 140 | 6 | 1 | 0.0847 | 0.0363 | 0.03664 | 0.196 |
| 141 | 5 | 1 | 0.0678 | 0.0327 | 0.02632 | 0.175 |
| 142 | 4 | 1 | 0.0508 | 0.0286 | 0.01688 | 0.153 |
| 143 | 3 | 1 | 0.0339 | 0.0236 | 0.00868 | 0.132 |
| 144 | 2 | 1 | 0.0169 | 0.0168 | 0.00243 | 0.118 |
| 145 | 1 | 1 | 0 | NaN | NA | NA |

**Table S85.** Golmarmara station Kaplan-Meier drought risk estimates according to SPI-3, 6, and 12

| Drought Risk (SPI3) | | Drought Risk (SPI6) | | Drought Risk (SPI12) | |
| --- | --- | --- | --- | --- | --- |
| Time | Drought Risk | Time | Drought Risk | Time | Drought Risk |
| 1 | 0.0667 | 1 | 0.0714 | 0 | 0.0169 |
| 2 | 0.0933 | 2 | 0.1286 | 1 | 0.0508 |
| 3 | 0.2133 | 3 | 0.1857 | 2 | 0.1017 |
| 4 | 0.3067 | 4 | 0.2286 | 3 | 0.1186 |
| 5 | 0.3333 | 5 | 0.2714 | 4 | 0.1525 |
| 6 | 0.4133 | 6 | 0.3286 | 5 | 0.1864 |
| 7 | 0.4933 | 7 | 0.3857 | 6 | 0.2034 |
| 8 | 0.5467 | 8 | 0.4571 | 7 | 0.2203 |
| 9 | 0.6 | 9 | 0.5 | 8 | 0.2542 |
| 10 | 0.6533 | 10 | 0.5571 | 9 | 0.3051 |
| 11 | 0.68 | 11 | 0.6286 | 10 | 0.322 |
| 12 | 0.6933 | 12 | 0.6571 | 11 | 0.339 |
| 13 | 0.7333 | 13 | 0.6857 | 12 | 0.3898 |
| 14 | 0.76 | 14 | 0.7 | 13 | 0.4407 |
| 15 | 0.8133 | 15 | 0.7143 | 14 | 0.4746 |
| 16 | 0.8533 | 16 | 0.7286 | 15 | 0.5085 |
| 17 | 0.8667 | 17 | 0.7571 | 16 | 0.5424 |
| 18 | 0.8933 | 18 | 0.7857 | 17 | 0.5763 |
| 20 | 0.9067 | 19 | 0.8143 | 18 | 0.6102 |
| 21 | 0.9333 | 20 | 0.8429 | 19 | 0.6441 |
| 25 | 0.9467 | 21 | 0.8571 | 20 | 0.661 |
| 30 | 0.96 | 22 | 0.8857 | 21 | 0.678 |
| 31 | 0.9733 | 23 | 0.9 | 22 | 0.6949 |
| 37 | 0.9867 | 24 | 0.9143 | 23 | 0.7288 |
| 38 | 1 | 25 | 0.9286 | 24 | 0.7627 |
|  |  | 26 | 0.9429 | 72 | 0.7797 |
|  |  | 41 | 0.9571 | 96 | 0.7966 |
|  |  | 42 | 0.9714 | 97 | 0.8136 |
|  |  | 43 | 0.9857 | 135 | 0.8305 |
|  |  | 61 | 1 | 136 | 0.8475 |
|  |  |  |  | 137 | 0.8644 |
|  |  |  |  | 138 | 0.8814 |
|  |  |  |  | 139 | 0.8983 |
|  |  |  |  | 140 | 0.9153 |
|  |  |  |  | 141 | 0.9322 |
|  |  |  |  | 142 | 0.9492 |
|  |  |  |  | 143 | 0.9661 |
|  |  |  |  | 144 | 0.9831 |
|  |  |  |  | 145 | 1 |

**Table S86.** Golmarmara station Kaplan-Meier survival estimates according to SPEI-3

| Kaplan-Meier Wet to Dry (SPEI3) | | | | | | | |
| --- | --- | --- | --- | --- | --- | --- | --- |
|  |  | n | events | median | 0.95LCL | 0.95UCL |
|  |  | 56 | 56 | 6 | 4 | 7 |
| time | n.risk | n.event | survival | std.err | lower 95% CI | upper 95% CI |
| 1 | 56 | 3 | 0.9464 | 0.0301 | 0.88925 | 1.000 |
| 2 | 53 | 3 | 0.8929 | 0.0413 | 0.81542 | 0.978 |
| 3 | 50 | 6 | 0.7857 | 0.0548 | 0.68527 | 0.901 |
| 4 | 44 | 10 | 0.6071 | 0.0653 | 0.49181 | 0.75 |
| 5 | 34 | 5 | 0.5179 | 0.0668 | 0.40221 | 0.667 |
| 6 | 29 | 5 | 0.4286 | 0.0661 | 0.31672 | 0.58 |
| 7 | 24 | 5 | 0.3393 | 0.0633 | 0.23542 | 0.489 |
| 8 | 19 | 4 | 0.2679 | 0.0592 | 0.17372 | 0.413 |
| 9 | 15 | 1 | 0.25 | 0.0579 | 0.15883 | 0.394 |
| 10 | 14 | 1 | 0.2321 | 0.0564 | 0.14417 | 0.374 |
| 11 | 13 | 2 | 0.1964 | 0.0531 | 0.11565 | 0.334 |
| 13 | 11 | 1 | 0.1786 | 0.0512 | 0.10182 | 0.313 |
| 14 | 10 | 1 | 0.1607 | 0.0491 | 0.08833 | 0.292 |
| 15 | 9 | 2 | 0.125 | 0.0442 | 0.06251 | 0.25 |
| 16 | 7 | 1 | 0.1071 | 0.0413 | 0.0503 | 0.228 |
| 30 | 6 | 2 | 0.0714 | 0.0344 | 0.02778 | 0.184 |
| 31 | 4 | 1 | 0.0536 | 0.0301 | 0.01782 | 0.161 |
| 43 | 3 | 1 | 0.0357 | 0.0248 | 0.00916 | 0.139 |
| 47 | 2 | 1 | 0.0179 | 0.0177 | 0.00256 | 0.125 |
| 48 | 1 | 1 | 0 | NaN | NA | NA |

**Table S87.** Golmarmara station Kaplan-Meier survival estimates according to SPEI-6

| Kaplan-Meier Wet to Dry (SPEI6) | | | | | | | |
| --- | --- | --- | --- | --- | --- | --- | --- |
|  |  | n | events | median | 0.95LCL | 0.95UCL |
|  |  | 67 | 67 | 8 | 7 | 15 |
| time | n.risk | n.event | survival | std.err | lower 95% CI | upper 95% CI |
| 1 | 67 | 4 | 0.9403 | 0.0289 | 0.88524 | 0.999 |
| 2 | 63 | 6 | 0.8507 | 0.0435 | 0.76956 | 0.94 |
| 3 | 57 | 5 | 0.7761 | 0.0509 | 0.68246 | 0.883 |
| 4 | 52 | 4 | 0.7164 | 0.0551 | 0.61623 | 0.833 |
| 5 | 48 | 3 | 0.6716 | 0.0574 | 0.5681 | 0.794 |
| 6 | 45 | 4 | 0.6119 | 0.0595 | 0.50571 | 0.74 |
| 7 | 41 | 5 | 0.5373 | 0.0609 | 0.43026 | 0.671 |
| 8 | 36 | 3 | 0.4925 | 0.0611 | 0.38626 | 0.628 |
| 9 | 33 | 2 | 0.4627 | 0.0609 | 0.35746 | 0.599 |
| 10 | 31 | 2 | 0.4328 | 0.0605 | 0.32907 | 0.569 |
| 11 | 29 | 1 | 0.4179 | 0.0603 | 0.31503 | 0.554 |
| 12 | 28 | 1 | 0.403 | 0.0599 | 0.3011 | 0.539 |
| 13 | 27 | 1 | 0.3881 | 0.0595 | 0.28728 | 0.524 |
| 14 | 26 | 1 | 0.3731 | 0.0591 | 0.27358 | 0.509 |
| 15 | 25 | 1 | 0.3582 | 0.0586 | 0.25998 | 0.494 |
| 16 | 24 | 1 | 0.3433 | 0.058 | 0.2465 | 0.478 |
| 17 | 23 | 2 | 0.3134 | 0.0567 | 0.21991 | 0.447 |
| 18 | 21 | 4 | 0.2537 | 0.0532 | 0.16828 | 0.383 |
| 19 | 17 | 3 | 0.209 | 0.0497 | 0.13114 | 0.333 |
| 20 | 14 | 1 | 0.194 | 0.0483 | 0.1191 | 0.316 |
| 21 | 13 | 1 | 0.1791 | 0.0468 | 0.10727 | 0.299 |
| 22 | 12 | 1 | 0.1642 | 0.0453 | 0.09565 | 0.282 |
| 23 | 11 | 1 | 0.1493 | 0.0435 | 0.08427 | 0.264 |
| 24 | 10 | 1 | 0.1343 | 0.0417 | 0.07314 | 0.247 |
| 27 | 9 | 1 | 0.1194 | 0.0396 | 0.06232 | 0.229 |
| 28 | 8 | 1 | 0.1045 | 0.0374 | 0.05183 | 0.211 |
| 40 | 7 | 1 | 0.0896 | 0.0349 | 0.04173 | 0.192 |
| 41 | 6 | 1 | 0.0746 | 0.0321 | 0.03211 | 0.173 |
| 42 | 5 | 2 | 0.0448 | 0.0253 | 0.01482 | 0.135 |
| 43 | 3 | 2 | 0.0149 | 0.0148 | 0.00213 | 0.104 |
| 63 | 1 | 1 | 0 | NaN | NA | NA |

**Table S88.** Golmarmara station Kaplan-Meier survival estimates according to SPEI-12

| Kaplan-Meier Wet to Dry (SPEI12) | | | | | | | |
| --- | --- | --- | --- | --- | --- | --- | --- |
|  |  | n | events | median | 0.95LCL | 0.95UCL |
|  |  | 52 | 52 | 14.5 | 11 | 19 |
| time | n.risk | n.event | survival | std.err | lower 95% CI | upper 95% CI |
| 1 | 52 | 3 | 0.9423 | 0.0323 | 0.88102 | 1.000 |
| 2 | 49 | 3 | 0.8846 | 0.0443 | 0.80191 | 0.976 |
| 3 | 46 | 2 | 0.8462 | 0.05 | 0.75356 | 0.95 |
| 4 | 44 | 2 | 0.8077 | 0.0547 | 0.70737 | 0.922 |
| 7 | 42 | 1 | 0.7885 | 0.0566 | 0.68492 | 0.908 |
| 8 | 41 | 2 | 0.75 | 0.06 | 0.64108 | 0.877 |
| 9 | 39 | 3 | 0.6923 | 0.064 | 0.57757 | 0.83 |
| 10 | 36 | 2 | 0.6538 | 0.066 | 0.53652 | 0.797 |
| 11 | 34 | 2 | 0.6154 | 0.0675 | 0.4964 | 0.763 |
| 12 | 32 | 2 | 0.5769 | 0.0685 | 0.45712 | 0.728 |
| 13 | 30 | 2 | 0.5385 | 0.0691 | 0.41867 | 0.693 |
| 14 | 28 | 2 | 0.5 | 0.0693 | 0.381 | 0.656 |
| 15 | 26 | 2 | 0.4615 | 0.0691 | 0.34412 | 0.619 |
| 16 | 24 | 2 | 0.4231 | 0.0685 | 0.30802 | 0.581 |
| 17 | 22 | 2 | 0.3846 | 0.0675 | 0.27272 | 0.542 |
| 18 | 20 | 2 | 0.3462 | 0.066 | 0.23825 | 0.503 |
| 19 | 18 | 2 | 0.3077 | 0.064 | 0.20467 | 0.463 |
| 21 | 16 | 1 | 0.2885 | 0.0628 | 0.18823 | 0.442 |
| 22 | 15 | 1 | 0.2692 | 0.0615 | 0.17205 | 0.421 |
| 64 | 14 | 1 | 0.25 | 0.06 | 0.15613 | 0.4 |
| 65 | 13 | 1 | 0.2308 | 0.0584 | 0.1405 | 0.379 |
| 66 | 12 | 1 | 0.2115 | 0.0566 | 0.12517 | 0.358 |
| 67 | 11 | 1 | 0.1923 | 0.0547 | 0.11018 | 0.336 |
| 68 | 10 | 2 | 0.1538 | 0.05 | 0.08133 | 0.291 |
| 69 | 8 | 1 | 0.1346 | 0.0473 | 0.06758 | 0.268 |
| 70 | 7 | 1 | 0.1154 | 0.0443 | 0.05436 | 0.245 |
| 71 | 6 | 1 | 0.0962 | 0.0409 | 0.04179 | 0.221 |
| 72 | 5 | 1 | 0.0769 | 0.037 | 0.03 | 0.197 |
| 73 | 4 | 1 | 0.0577 | 0.0323 | 0.01923 | 0.173 |
| 74 | 3 | 1 | 0.0385 | 0.0267 | 0.00988 | 0.15 |
| 91 | 2 | 1 | 0.0192 | 0.019 | 0.00276 | 0.134 |
| 92 | 1 | 1 | 0 | NaN | NA | NA |

**Table S89.** Golmarmara station Kaplan-Meier drought risk estimates according to SPEI-3, 6, and 12

| Drought Risk (SPEI3) | | Drought Risk (SPEI6) | | Drought Risk (SPEI12) | |
| --- | --- | --- | --- | --- | --- |
| Time | Drought Risk | Time | Drought Risk | Time | Drought Risk |
| 1 | 0.0536 | 1 | 0.0597 | 1 | 0.0577 |
| 2 | 0.1071 | 2 | 0.1493 | 2 | 0.1154 |
| 3 | 0.2143 | 3 | 0.2239 | 3 | 0.1538 |
| 4 | 0.3929 | 4 | 0.2836 | 4 | 0.1923 |
| 5 | 0.4821 | 5 | 0.3284 | 6 | 0.2051 |
| 6 | 0.5714 | 6 | 0.3881 | 7 | 0.2115 |
| 7 | 0.6607 | 7 | 0.4627 | 8 | 0.25 |
| 8 | 0.7321 | 8 | 0.5075 | 9 | 0.3077 |
| 9 | 0.75 | 9 | 0.5373 | 10 | 0.3462 |
| 10 | 0.7679 | 10 | 0.5672 | 11 | 0.3846 |
| 11 | 0.8036 | 11 | 0.5821 | 12 | 0.4231 |
| 12 | 0.8125 | 12 | 0.597 | 13 | 0.4615 |
| 13 | 0.8214 | 13 | 0.6119 | 14 | 0.5 |
| 14 | 0.8393 | 14 | 0.6269 | 15 | 0.5385 |
| 15 | 0.875 | 15 | 0.6418 | 16 | 0.5769 |
| 16 | 0.8929 | 16 | 0.6567 | 17 | 0.6154 |
| 30 | 0.9286 | 17 | 0.6866 | 18 | 0.6538 |
| 31 | 0.9464 | 18 | 0.7463 | 19 | 0.6923 |
| 43 | 0.9643 | 19 | 0.791 | 21 | 0.7115 |
| 47 | 0.9821 | 20 | 0.806 | 22 | 0.7308 |
| 48 | 1 | 21 | 0.8209 | 64 | 0.75 |
|  |  | 22 | 0.8358 | 65 | 0.7692 |
|  |  | 23 | 0.8507 | 66 | 0.7885 |
|  |  | 24 | 0.8657 | 67 | 0.8077 |
|  |  | 27 | 0.8806 | 68 | 0.8462 |
|  |  | 28 | 0.8955 | 69 | 0.8654 |
|  |  | 40 | 0.9104 | 70 | 0.8846 |
|  |  | 41 | 0.9254 | 71 | 0.9038 |
|  |  | 42 | 0.9552 | 72 | 0.9231 |
|  |  | 43 | 0.9851 | 73 | 0.9423 |
|  |  | 63 | 1 | 74 | 0.9615 |
|  |  |  |  | 91 | 0.9808 |
|  |  |  |  | 92 | 1 |

**Table S90.** Gordes station Kaplan-Meier survival estimates according to SPI-3

| Kaplan-Meier Wet to Dry (SPI3) | | | | | | |
| --- | --- | --- | --- | --- | --- | --- |
|  |  | n | events | median | 0.95LCL | 0.95UCL |
|  |  | 76 | 76 | 10 | 8 | 12 |
| time | n.risk | n.event | survival | std.err | lower 95% CL | upper 95% CL |
| 1 | 76 | 3 | 0.9605 | 0.0223 | 0.91773 | 1 |
| 3 | 73 | 1 | 0.9474 | 0.0256 | 0.89847 | 0.9989 |
| 4 | 72 | 7 | 0.8553 | 0.0404 | 0.77971 | 0.9381 |
| 5 | 65 | 9 | 0.7368 | 0.0505 | 0.6442 | 0.8428 |
| 6 | 56 | 5 | 0.6711 | 0.0539 | 0.57332 | 0.7854 |
| 7 | 51 | 5 | 0.6053 | 0.0561 | 0.50477 | 0.7258 |
| 8 | 46 | 5 | 0.5395 | 0.0572 | 0.43829 | 0.664 |
| 9 | 41 | 2 | 0.5132 | 0.0573 | 0.41224 | 0.6388 |
| 10 | 39 | 4 | 0.4605 | 0.0572 | 0.36106 | 0.5874 |
| 11 | 35 | 3 | 0.4211 | 0.0566 | 0.32348 | 0.5481 |
| 12 | 32 | 5 | 0.3553 | 0.0549 | 0.26243 | 0.4809 |
| 13 | 27 | 2 | 0.3289 | 0.0539 | 0.2386 | 0.4535 |
| 14 | 25 | 2 | 0.3026 | 0.0527 | 0.21513 | 0.4257 |
| 15 | 23 | 2 | 0.2763 | 0.0513 | 0.19204 | 0.3976 |
| 16 | 21 | 3 | 0.2368 | 0.0488 | 0.15819 | 0.3546 |
| 17 | 18 | 6 | 0.1579 | 0.0418 | 0.09395 | 0.2654 |
| 18 | 12 | 4 | 0.1053 | 0.0352 | 0.05465 | 0.2027 |
| 19 | 8 | 2 | 0.0789 | 0.0309 | 0.03663 | 0.1702 |
| 23 | 6 | 1 | 0.0658 | 0.0284 | 0.0282 | 0.1535 |
| 25 | 5 | 3 | 0.0263 | 0.0184 | 0.0067 | 0.1033 |
| 27 | 2 | 1 | 0.0132 | 0.0131 | 0.00188 | 0.0922 |
| 29 | 1 | 1 | 0 | NaN | NA | NA |

**Table S91.** Gordes station Kaplan-Meier survival estimates according to SPI-6

| Kaplan-Meier Wet to Dry (SPI6) | | | | | | |
| --- | --- | --- | --- | --- | --- | --- |
|  |  | n | events | median | 0.95LCL | 0.95UCL |
|  |  | 64 | 64 | 8 | 7 | 10 |
| time | n.risk | n.event | survival | std.err | lower 95% CL | upper 95% CL |
| 1 | 64 | 4 | 0.9375 | 0.0303 | 0.88003 | 0.999 |
| 2 | 60 | 3 | 0.8906 | 0.039 | 0.81735 | 0.97 |
| 3 | 57 | 3 | 0.8438 | 0.0454 | 0.75932 | 0.938 |
| 4 | 54 | 3 | 0.7969 | 0.0503 | 0.70416 | 0.902 |
| 5 | 51 | 3 | 0.75 | 0.0541 | 0.65108 | 0.864 |
| 6 | 48 | 6 | 0.6562 | 0.0594 | 0.54962 | 0.784 |
| 7 | 42 | 7 | 0.5469 | 0.0622 | 0.43756 | 0.684 |
| 8 | 35 | 4 | 0.4844 | 0.0625 | 0.37619 | 0.624 |
| 9 | 31 | 5 | 0.4062 | 0.0614 | 0.30211 | 0.546 |
| 10 | 26 | 3 | 0.3594 | 0.06 | 0.25911 | 0.498 |
| 11 | 23 | 2 | 0.3281 | 0.0587 | 0.23109 | 0.466 |
| 14 | 21 | 2 | 0.2969 | 0.0571 | 0.20362 | 0.433 |
| 15 | 19 | 2 | 0.2656 | 0.0552 | 0.17675 | 0.399 |
| 16 | 17 | 1 | 0.25 | 0.0541 | 0.16355 | 0.382 |
| 17 | 16 | 1 | 0.2344 | 0.053 | 0.15052 | 0.365 |
| 18 | 15 | 1 | 0.2188 | 0.0517 | 0.13768 | 0.348 |
| 19 | 14 | 1 | 0.2031 | 0.0503 | 0.12503 | 0.33 |
| 20 | 13 | 1 | 0.1875 | 0.0488 | 0.11259 | 0.312 |
| 21 | 12 | 1 | 0.1719 | 0.0472 | 0.10038 | 0.294 |
| 22 | 11 | 1 | 0.1562 | 0.0454 | 0.08842 | 0.276 |
| 26 | 10 | 1 | 0.1406 | 0.0435 | 0.07674 | 0.258 |
| 37 | 9 | 1 | 0.125 | 0.0413 | 0.06537 | 0.239 |
| 38 | 8 | 1 | 0.1094 | 0.039 | 0.05436 | 0.22 |
| 39 | 7 | 2 | 0.0781 | 0.0335 | 0.03367 | 0.181 |
| 43 | 5 | 1 | 0.0625 | 0.0303 | 0.0242 | 0.161 |
| 44 | 4 | 1 | 0.0469 | 0.0264 | 0.01553 | 0.141 |
| 45 | 3 | 1 | 0.0312 | 0.0217 | 0.00799 | 0.122 |
| 46 | 2 | 1 | 0.0156 | 0.0155 | 0.00224 | 0.109 |
| 65 | 1 | 1 | 0 | NaN | NA | NA |

**Table S92.** Gordes station Kaplan-Meier survival estimates according to SPI-12

| Kaplan-Meier Wet to Dry (SPI12) | | | | | | |
| --- | --- | --- | --- | --- | --- | --- |
|  |  | n | events | median | 0.95LCL | 0.95UCL |
|  |  | 63 | 63 | 18 | 15 | 22 |
| time | n.risk | n.event | survival | std.err | lower 95% CL | upper 95% CL |
| 1 | 63 | 1 | 0.9841 | 0.0157 | 0.95374 | 1 |
| 2 | 62 | 2 | 0.9524 | 0.0268 | 0.90122 | 1 |
| 3 | 60 | 1 | 0.9365 | 0.0307 | 0.87819 | 0.999 |
| 4 | 59 | 1 | 0.9206 | 0.0341 | 0.85625 | 0.99 |
| 5 | 58 | 1 | 0.9048 | 0.037 | 0.8351 | 0.98 |
| 6 | 57 | 1 | 0.8889 | 0.0396 | 0.81458 | 0.97 |
| 7 | 56 | 1 | 0.873 | 0.0419 | 0.79455 | 0.959 |
| 8 | 55 | 3 | 0.8254 | 0.0478 | 0.73678 | 0.925 |
| 9 | 52 | 2 | 0.7937 | 0.051 | 0.69976 | 0.9 |
| 10 | 50 | 2 | 0.7619 | 0.0537 | 0.66367 | 0.875 |
| 12 | 48 | 3 | 0.7143 | 0.0569 | 0.61101 | 0.835 |
| 13 | 45 | 3 | 0.6667 | 0.0594 | 0.55986 | 0.794 |
| 14 | 42 | 3 | 0.619 | 0.0612 | 0.51003 | 0.751 |
| 15 | 39 | 3 | 0.5714 | 0.0623 | 0.46141 | 0.708 |
| 16 | 36 | 2 | 0.5397 | 0.0628 | 0.42963 | 0.678 |
| 17 | 34 | 2 | 0.5079 | 0.063 | 0.39834 | 0.648 |
| 18 | 32 | 2 | 0.4762 | 0.0629 | 0.36754 | 0.617 |
| 19 | 30 | 2 | 0.4444 | 0.0626 | 0.33722 | 0.586 |
| 20 | 28 | 2 | 0.4127 | 0.062 | 0.3074 | 0.554 |
| 21 | 26 | 2 | 0.381 | 0.0612 | 0.27808 | 0.522 |
| 22 | 24 | 2 | 0.3492 | 0.0601 | 0.24928 | 0.489 |
| 23 | 22 | 2 | 0.3175 | 0.0586 | 0.22103 | 0.456 |
| 24 | 20 | 2 | 0.2857 | 0.0569 | 0.19336 | 0.422 |
| 25 | 18 | 3 | 0.2381 | 0.0537 | 0.15308 | 0.37 |
| 26 | 15 | 2 | 0.2063 | 0.051 | 0.12714 | 0.335 |
| 27 | 13 | 1 | 0.1905 | 0.0495 | 0.11449 | 0.317 |
| 28 | 12 | 1 | 0.1746 | 0.0478 | 0.10207 | 0.299 |
| 29 | 11 | 1 | 0.1587 | 0.046 | 0.0899 | 0.28 |
| 48 | 10 | 1 | 0.1429 | 0.0441 | 0.07802 | 0.262 |
| 49 | 9 | 1 | 0.127 | 0.0419 | 0.06646 | 0.243 |
| 112 | 8 | 1 | 0.1111 | 0.0396 | 0.05526 | 0.223 |
| 113 | 7 | 1 | 0.0952 | 0.037 | 0.04449 | 0.204 |
| 114 | 6 | 1 | 0.0794 | 0.0341 | 0.03423 | 0.184 |
| 115 | 5 | 1 | 0.0635 | 0.0307 | 0.0246 | 0.164 |
| 116 | 4 | 1 | 0.0476 | 0.0268 | 0.01578 | 0.144 |
| 117 | 3 | 1 | 0.0317 | 0.0221 | 0.00812 | 0.124 |
| 118 | 2 | 1 | 0.0159 | 0.0157 | 0.00227 | 0.111 |
| 179 | 1 | 1 | 0 | NaN | NA | NA |

**Table S93.** Gordes station Kaplan-Meier drought risk estimates according to SPI-3, 6, and 12

| Drought Risk (SPI3) | | Drought Risk (SPI6) | | Drought Risk (SPI12) | |
| --- | --- | --- | --- | --- | --- |
| Time | Drought Risk | Time | Drought Risk | Time | Drought Risk |
| 1 | 0.0395 | 1 | 0.0625 | 1 | 0.0159 |
| 3 | 0.0526 | 2 | 0.1094 | 2 | 0.0476 |
| 4 | 0.1447 | 3 | 0.1562 | 3 | 0.0635 |
| 5 | 0.2632 | 4 | 0.2031 | 4 | 0.0794 |
| 6 | 0.3289 | 5 | 0.25 | 5 | 0.0952 |
| 7 | 0.3947 | 6 | 0.3438 | 6 | 0.1111 |
| 8 | 0.4605 | 7 | 0.4531 | 7 | 0.127 |
| 9 | 0.4868 | 8 | 0.5156 | 8 | 0.1746 |
| 10 | 0.5395 | 9 | 0.5938 | 9 | 0.2063 |
| 11 | 0.5789 | 10 | 0.6406 | 10 | 0.2381 |
| 12 | 0.6447 | 11 | 0.6719 | 12 | 0.2857 |
| 13 | 0.6711 | 12 | 0.6823 | 13 | 0.3333 |
| 14 | 0.6974 | 14 | 0.7031 | 14 | 0.381 |
| 15 | 0.7237 | 15 | 0.7344 | 15 | 0.4286 |
| 16 | 0.7632 | 16 | 0.75 | 16 | 0.4603 |
| 17 | 0.8421 | 17 | 0.7656 | 17 | 0.4921 |
| 18 | 0.8947 | 18 | 0.7812 | 18 | 0.5238 |
| 19 | 0.9211 | 19 | 0.7969 | 19 | 0.5556 |
| 23 | 0.9342 | 20 | 0.8125 | 20 | 0.5873 |
| 25 | 0.9737 | 21 | 0.8281 | 21 | 0.619 |
| 27 | 0.9868 | 22 | 0.8438 | 22 | 0.6508 |
| 29 | 1 | 26 | 0.8594 | 23 | 0.6825 |
|  |  | 37 | 0.875 | 24 | 0.7143 |
|  |  | 38 | 0.8906 | 25 | 0.7619 |
|  |  | 39 | 0.9219 | 26 | 0.7937 |
|  |  | 43 | 0.9375 | 27 | 0.8095 |
|  |  | 44 | 0.9531 | 28 | 0.8254 |
|  |  | 45 | 0.9688 | 29 | 0.8413 |
|  |  | 46 | 0.9844 | 48 | 0.8571 |
|  |  | 65 | 1 | 49 | 0.873 |
|  |  |  |  | 112 | 0.8889 |
|  |  |  |  | 113 | 0.9048 |
|  |  |  |  | 114 | 0.9206 |
|  |  |  |  | 115 | 0.9365 |
|  |  |  |  | 116 | 0.9524 |
|  |  |  |  | 117 | 0.9683 |
|  |  |  |  | 118 | 0.9841 |
|  |  |  |  | 179 | 1 |

**Table S94.** Gordes station Kaplan-Meier survival estimates according to SPEI-3

| Kaplan-Meier Wet to Dry (SPEI3) | | | | | | | |
| --- | --- | --- | --- | --- | --- | --- | --- |
|  |  | n | events | median | 0.95LCL | 0.95UCL |
|  |  | 88 | 88 | 7 | 6 | 10 |
| time | n.risk | n.event | survival | std.err | lower 95% CI | upper 95% CI |
| 1 | 88 | 5 | 0.9432 | 0.0247 | 0.896 | 0.993 |
| 2 | 83 | 4 | 0.8977 | 0.0323 | 0.8366 | 0.963 |
| 3 | 79 | 7 | 0.8182 | 0.0411 | 0.7414 | 0.903 |
| 4 | 72 | 8 | 0.7273 | 0.0475 | 0.6399 | 0.827 |
| 5 | 64 | 7 | 0.6477 | 0.0509 | 0.5552 | 0.756 |
| 6 | 57 | 8 | 0.5568 | 0.053 | 0.4621 | 0.671 |
| 7 | 49 | 6 | 0.4886 | 0.0533 | 0.3946 | 0.605 |
| 8 | 43 | 5 | 0.4318 | 0.0528 | 0.3398 | 0.549 |
| 9 | 38 | 4 | 0.3864 | 0.0519 | 0.2969 | 0.503 |
| 10 | 34 | 4 | 0.3409 | 0.0505 | 0.255 | 0.456 |
| 11 | 30 | 2 | 0.3182 | 0.0497 | 0.2343 | 0.432 |
| 12 | 28 | 1 | 0.3068 | 0.0492 | 0.2241 | 0.42 |
| 13 | 27 | 2 | 0.2841 | 0.0481 | 0.2039 | 0.396 |
| 16 | 25 | 1 | 0.2727 | 0.0475 | 0.1939 | 0.384 |
| 17 | 24 | 3 | 0.2386 | 0.0454 | 0.1643 | 0.347 |
| 18 | 21 | 4 | 0.1932 | 0.0421 | 0.126 | 0.296 |
| 19 | 17 | 2 | 0.1705 | 0.0401 | 0.1075 | 0.27 |
| 20 | 15 | 2 | 0.1477 | 0.0378 | 0.0894 | 0.244 |
| 21 | 13 | 2 | 0.125 | 0.0353 | 0.0719 | 0.217 |
| 22 | 11 | 2 | 0.1023 | 0.0323 | 0.0551 | 0.19 |
| 23 | 9 | 1 | 0.0909 | 0.0306 | 0.047 | 0.176 |
| 25 | 8 | 1 | 0.0795 | 0.0288 | 0.0391 | 0.162 |
| 26 | 7 | 1 | 0.0682 | 0.0269 | 0.0315 | 0.148 |
| 41 | 6 | 1 | 0.0568 | 0.0247 | 0.0243 | 0.133 |
| 42 | 5 | 2 | 0.0341 | 0.0193 | 0.0112 | 0.104 |
| 43 | 3 | 3 | 0 | NaN | NA | NA |

**Table S95.** Gordes station Kaplan-Meier survival estimates according to SPEI-6

| Kaplan-Meier Wet to Dry (SPEI6) | | | | | | | |
| --- | --- | --- | --- | --- | --- | --- | --- |
|  |  | n | events | median | 0.95LCL | 0.95UCL |
|  |  | 91 | 91 | 7 | 6 | 10 |
| time | n.risk | n.event | survival | std.err | lower 95% CI | upper 95% CI |
| 1 | 91 | 6 | 0.9341 | 0.026 | 0.88444 | 0.9865 |
| 2 | 85 | 9 | 0.8352 | 0.0389 | 0.76231 | 0.915 |
| 3 | 76 | 8 | 0.7473 | 0.0456 | 0.66309 | 0.8421 |
| 4 | 68 | 6 | 0.6813 | 0.0488 | 0.592 | 0.7841 |
| 5 | 62 | 5 | 0.6264 | 0.0507 | 0.53446 | 0.7341 |
| 6 | 57 | 6 | 0.5604 | 0.052 | 0.4672 | 0.6723 |
| 7 | 51 | 6 | 0.4945 | 0.0524 | 0.40175 | 0.6087 |
| 8 | 45 | 5 | 0.4396 | 0.052 | 0.34855 | 0.5543 |
| 9 | 40 | 4 | 0.3956 | 0.0513 | 0.30688 | 0.51 |
| 10 | 36 | 4 | 0.3516 | 0.0501 | 0.26604 | 0.4648 |
| 11 | 32 | 2 | 0.3297 | 0.0493 | 0.24595 | 0.4419 |
| 12 | 30 | 2 | 0.3077 | 0.0484 | 0.22608 | 0.4188 |
| 13 | 28 | 1 | 0.2967 | 0.0479 | 0.21624 | 0.4071 |
| 14 | 27 | 2 | 0.2747 | 0.0468 | 0.19675 | 0.3836 |
| 15 | 25 | 2 | 0.2527 | 0.0456 | 0.17752 | 0.3598 |
| 16 | 23 | 2 | 0.2308 | 0.0442 | 0.15859 | 0.3358 |
| 17 | 21 | 3 | 0.1978 | 0.0418 | 0.13078 | 0.2992 |
| 18 | 18 | 1 | 0.1868 | 0.0409 | 0.12169 | 0.2868 |
| 19 | 17 | 2 | 0.1648 | 0.0389 | 0.1038 | 0.2618 |
| 20 | 15 | 1 | 0.1538 | 0.0378 | 0.09502 | 0.2491 |
| 22 | 14 | 1 | 0.1429 | 0.0367 | 0.08636 | 0.2363 |
| 23 | 13 | 2 | 0.1209 | 0.0342 | 0.06946 | 0.2104 |
| 24 | 11 | 1 | 0.1099 | 0.0328 | 0.06124 | 0.1972 |
| 40 | 10 | 1 | 0.0989 | 0.0313 | 0.05319 | 0.1839 |
| 41 | 9 | 1 | 0.0879 | 0.0297 | 0.04536 | 0.1704 |
| 42 | 8 | 2 | 0.0659 | 0.026 | 0.03043 | 0.1429 |
| 43 | 6 | 2 | 0.044 | 0.0215 | 0.01686 | 0.1146 |
| 44 | 4 | 2 | 0.022 | 0.0154 | 0.00558 | 0.0865 |
| 45 | 2 | 1 | 0.011 | 0.0109 | 0.00156 | 0.0772 |
| 104 | 1 | 1 | 0 | NaN | NA | NA |

**Table S96.** Gordes station Kaplan-Meier survival estimates according to SPEI-12

| Kaplan-Meier Wet to Dry (SPEI12) | | | | | | | |
| --- | --- | --- | --- | --- | --- | --- | --- |
|  |  | n | events | median | 0.95LCL | 0.95UCL |
|  |  | 84 | 84 | 16 | 14 | 19 |
| time | n.risk | n.event | survival | std.err | lower 95% CI | upper 95% CI |
| 1 | 84 | 2 | 0.9762 | 0.0166 | 0.94413 | 10.000 |
| 2 | 82 | 2 | 0.9524 | 0.0232 | 0.90791 | 0.999 |
| 3 | 80 | 2 | 0.9286 | 0.0281 | 0.8751 | 0.9853 |
| 4 | 78 | 2 | 0.9048 | 0.032 | 0.84412 | 0.9698 |
| 5 | 76 | 2 | 0.881 | 0.0353 | 0.81435 | 0.953 |
| 6 | 74 | 2 | 0.8571 | 0.0382 | 0.78548 | 0.9353 |
| 7 | 72 | 3 | 0.8214 | 0.0418 | 0.74348 | 0.9076 |
| 8 | 69 | 3 | 0.7857 | 0.0448 | 0.70269 | 0.8785 |
| 9 | 66 | 3 | 0.75 | 0.0472 | 0.66289 | 0.8486 |
| 10 | 63 | 3 | 0.7143 | 0.0493 | 0.62393 | 0.8177 |
| 11 | 60 | 2 | 0.6905 | 0.0504 | 0.59837 | 0.7968 |
| 12 | 58 | 4 | 0.6429 | 0.0523 | 0.54814 | 0.7539 |
| 13 | 54 | 3 | 0.6071 | 0.0533 | 0.51119 | 0.7211 |
| 14 | 51 | 4 | 0.5595 | 0.0542 | 0.46282 | 0.6764 |
| 15 | 47 | 4 | 0.5119 | 0.0545 | 0.41543 | 0.6308 |
| 16 | 43 | 4 | 0.4643 | 0.0544 | 0.369 | 0.5842 |
| 17 | 39 | 3 | 0.4286 | 0.054 | 0.3348 | 0.5486 |
| 18 | 36 | 4 | 0.381 | 0.053 | 0.29005 | 0.5003 |
| 19 | 32 | 3 | 0.3452 | 0.0519 | 0.25717 | 0.4635 |
| 20 | 29 | 2 | 0.3214 | 0.051 | 0.23558 | 0.4386 |
| 21 | 27 | 2 | 0.2976 | 0.0499 | 0.21428 | 0.4134 |
| 22 | 25 | 2 | 0.2738 | 0.0487 | 0.19329 | 0.3879 |
| 23 | 23 | 4 | 0.2262 | 0.0456 | 0.1523 | 0.3359 |
| 24 | 19 | 3 | 0.1905 | 0.0428 | 0.12257 | 0.296 |
| 25 | 16 | 1 | 0.1786 | 0.0418 | 0.11288 | 0.2825 |
| 26 | 15 | 1 | 0.1667 | 0.0407 | 0.10332 | 0.2689 |
| 27 | 14 | 1 | 0.1548 | 0.0395 | 0.09389 | 0.2551 |
| 28 | 13 | 1 | 0.1429 | 0.0382 | 0.08461 | 0.2412 |
| 29 | 12 | 1 | 0.131 | 0.0368 | 0.07548 | 0.2272 |
| 30 | 11 | 1 | 0.119 | 0.0353 | 0.06654 | 0.213 |
| 31 | 10 | 1 | 0.1071 | 0.0337 | 0.05779 | 0.1986 |
| 32 | 9 | 1 | 0.0952 | 0.032 | 0.04927 | 0.1841 |
| 33 | 8 | 1 | 0.0833 | 0.0302 | 0.041 | 0.1694 |
| 34 | 7 | 1 | 0.0714 | 0.0281 | 0.03304 | 0.1544 |
| 35 | 6 | 1 | 0.0595 | 0.0258 | 0.02544 | 0.1393 |
| 36 | 5 | 1 | 0.0476 | 0.0232 | 0.0183 | 0.1239 |
| 37 | 4 | 1 | 0.0357 | 0.0202 | 0.01176 | 0.1085 |
| 112 | 3 | 1 | 0.0238 | 0.0166 | 0.00605 | 0.0936 |
| 113 | 2 | 1 | 0.0119 | 0.0118 | 0.0017 | 0.0835 |
| 181 | 1 | 1 | 0 | NaN | NA | NA |

**Table S97.** Gordes station Kaplan-Meier drought risk estimates according to SPEI-3, 6, and 12

| Drought Risk (SPEI3) | | Drought Risk (SPEI6) | | Drought Risk (SPEI12) | |
| --- | --- | --- | --- | --- | --- |
| Time | Drought Risk | Time | Drought Risk | Time | Drought Risk |
| 1 | 0.0568 | 1 | 0.0659 | 1 | 0.0238 |
| 2 | 0.1023 | 2 | 0.1648 | 2 | 0.0476 |
| 3 | 0.1818 | 3 | 0.2527 | 3 | 0.0714 |
| 4 | 0.2727 | 4 | 0.3187 | 4 | 0.0952 |
| 5 | 0.3523 | 5 | 0.3736 | 5 | 0.119 |
| 6 | 0.4432 | 6 | 0.4396 | 6 | 0.1429 |
| 7 | 0.5114 | 7 | 0.5055 | 7 | 0.1786 |
| 8 | 0.5682 | 8 | 0.5604 | 8 | 0.2143 |
| 9 | 0.6136 | 9 | 0.6044 | 9 | 0.25 |
| 10 | 0.6591 | 10 | 0.6484 | 10 | 0.2857 |
| 11 | 0.6818 | 11 | 0.6703 | 11 | 0.3095 |
| 12 | 0.6932 | 12 | 0.6923 | 12 | 0.3571 |
| 13 | 0.7159 | 13 | 0.7033 | 13 | 0.3929 |
| 16 | 0.7273 | 14 | 0.7253 | 14 | 0.4405 |
| 17 | 0.7614 | 15 | 0.7473 | 15 | 0.4881 |
| 18 | 0.8068 | 16 | 0.7692 | 16 | 0.5357 |
| 19 | 0.8295 | 17 | 0.8022 | 17 | 0.5714 |
| 20 | 0.8523 | 18 | 0.8132 | 18 | 0.619 |
| 21 | 0.875 | 19 | 0.8352 | 19 | 0.6548 |
| 22 | 0.8977 | 20 | 0.8462 | 20 | 0.6786 |
| 23 | 0.9091 | 22 | 0.8571 | 21 | 0.7024 |
| 25 | 0.9205 | 23 | 0.8791 | 22 | 0.7262 |
| 26 | 0.9318 | 24 | 0.8901 | 23 | 0.7738 |
| 41 | 0.9432 | 40 | 0.9011 | 24 | 0.8095 |
| 42 | 0.9659 | 41 | 0.9121 | 25 | 0.8214 |
| 43 | 1 | 42 | 0.9341 | 26 | 0.8333 |
|  |  | 43 | 0.956 | 27 | 0.8452 |
|  |  | 44 | 0.978 | 28 | 0.8571 |
|  |  | 45 | 0.989 | 29 | 0.869 |
|  |  | 104 | 1 | 30 | 0.881 |
|  |  |  |  | 31 | 0.8929 |
|  |  |  |  | 32 | 0.9048 |
|  |  |  |  | 33 | 0.9167 |
|  |  |  |  | 34 | 0.9286 |
|  |  |  |  | 35 | 0.9405 |
|  |  |  |  | 36 | 0.9524 |
|  |  |  |  | 37 | 0.9643 |
|  |  |  |  | 112 | 0.9762 |
|  |  |  |  | 113 | 0.9881 |
|  |  |  |  | 181 | 1 |

**Table S98.** Guney station Kaplan-Meier survival estimates according to SPI-3

| Kaplan-Meier Wet to Dry (SPI3) | | | | | | |
| --- | --- | --- | --- | --- | --- | --- |
|  |  | n | events | median | 0.95LCL | 0.95UCL |
|  |  | 134 | 134 | 9 | 8 | 11 |
| time | n.risk | n.event | survival | std.err | lower 95% CL | upper 95% CL |
| 1 | 134 | 6 | 0.95522 | 0.01787 | 0.92084 | 0.9909 |
| 2 | 128 | 4 | 0.92537 | 0.0227 | 0.88193 | 0.971 |
| 3 | 124 | 11 | 0.84328 | 0.0314 | 0.78392 | 0.9071 |
| 4 | 113 | 10 | 0.76866 | 0.03643 | 0.70047 | 0.8435 |
| 5 | 103 | 9 | 0.70149 | 0.03953 | 0.62814 | 0.7834 |
| 6 | 94 | 5 | 0.66418 | 0.0408 | 0.58884 | 0.7492 |
| 7 | 89 | 7 | 0.61194 | 0.0421 | 0.53475 | 0.7003 |
| 8 | 82 | 10 | 0.53731 | 0.04307 | 0.45919 | 0.6287 |
| 9 | 72 | 7 | 0.48507 | 0.04317 | 0.40742 | 0.5775 |
| 10 | 65 | 5 | 0.44776 | 0.04296 | 0.37101 | 0.5404 |
| 11 | 60 | 7 | 0.39552 | 0.04224 | 0.32082 | 0.4876 |
| 12 | 53 | 5 | 0.35821 | 0.04142 | 0.28557 | 0.4493 |
| 13 | 48 | 6 | 0.31343 | 0.04007 | 0.24396 | 0.4027 |
| 14 | 42 | 4 | 0.28358 | 0.03894 | 0.21667 | 0.3712 |
| 15 | 38 | 5 | 0.24627 | 0.03722 | 0.18313 | 0.3312 |
| 16 | 33 | 6 | 0.20149 | 0.03465 | 0.14384 | 0.2823 |
| 17 | 27 | 6 | 0.15672 | 0.0314 | 0.10581 | 0.2321 |
| 18 | 21 | 3 | 0.13433 | 0.02946 | 0.0874 | 0.2065 |
| 19 | 18 | 1 | 0.12687 | 0.02875 | 0.08136 | 0.1978 |
| 20 | 17 | 1 | 0.1194 | 0.02801 | 0.07539 | 0.1891 |
| 21 | 16 | 1 | 0.11194 | 0.02724 | 0.06948 | 0.1803 |
| 22 | 15 | 1 | 0.10448 | 0.02642 | 0.06364 | 0.1715 |
| 23 | 14 | 2 | 0.08955 | 0.02467 | 0.05219 | 0.1537 |
| 24 | 12 | 1 | 0.08209 | 0.02371 | 0.0466 | 0.1446 |
| 25 | 11 | 1 | 0.07463 | 0.0227 | 0.04111 | 0.1355 |
| 26 | 10 | 2 | 0.0597 | 0.02047 | 0.03049 | 0.1169 |
| 30 | 8 | 1 | 0.05224 | 0.01922 | 0.0254 | 0.1074 |
| 31 | 7 | 1 | 0.04478 | 0.01787 | 0.02048 | 0.0979 |
| 32 | 6 | 1 | 0.03731 | 0.01637 | 0.01579 | 0.0882 |
| 33 | 5 | 1 | 0.02985 | 0.0147 | 0.01137 | 0.0784 |
| 40 | 4 | 1 | 0.02239 | 0.01278 | 0.00731 | 0.0685 |
| 56 | 3 | 1 | 0.01493 | 0.01047 | 0.00377 | 0.0591 |
| 57 | 2 | 1 | 0.00746 | 0.00743 | 0.00106 | 0.0526 |
| 58 | 1 | 1 | 0 | NaN | NA | NA |

**Table S99.** Guney station Kaplan-Meier survival estimates according to SPI-6

| Kaplan-Meier Wet to Dry (SPI6) | | | | | | |
| --- | --- | --- | --- | --- | --- | --- |
|  |  | n | events | median | 0.95LCL | 0.95UCL |
|  |  | 120 | 120 | 14 | 10 | 16 |
| time | n.risk | n.event | survival | std.err | lower 95% CL | upper 95% CL |
| 1 | 120 | 4 | 0.96667 | 0.0164 | 0.93508 | 0.9993 |
| 2 | 116 | 9 | 0.89167 | 0.0284 | 0.83776 | 0.949 |
| 3 | 107 | 10 | 0.80833 | 0.0359 | 0.74089 | 0.8819 |
| 4 | 97 | 7 | 0.75 | 0.0395 | 0.67639 | 0.8316 |
| 5 | 90 | 3 | 0.725 | 0.0408 | 0.64935 | 0.8095 |
| 6 | 87 | 3 | 0.7 | 0.0418 | 0.62263 | 0.787 |
| 7 | 84 | 3 | 0.675 | 0.0428 | 0.59619 | 0.7642 |
| 8 | 81 | 5 | 0.63333 | 0.044 | 0.55272 | 0.7257 |
| 9 | 76 | 3 | 0.60833 | 0.0446 | 0.52698 | 0.7022 |
| 10 | 73 | 4 | 0.575 | 0.0451 | 0.49302 | 0.6706 |
| 11 | 69 | 3 | 0.55 | 0.0454 | 0.46782 | 0.6466 |
| 12 | 66 | 2 | 0.53333 | 0.0455 | 0.45114 | 0.6305 |
| 13 | 64 | 3 | 0.50833 | 0.0456 | 0.42631 | 0.6061 |
| 14 | 61 | 5 | 0.46667 | 0.0455 | 0.38542 | 0.565 |
| 15 | 56 | 4 | 0.43333 | 0.0452 | 0.35315 | 0.5317 |
| 16 | 52 | 5 | 0.39167 | 0.0446 | 0.31338 | 0.4895 |
| 17 | 47 | 4 | 0.35833 | 0.0438 | 0.28204 | 0.4553 |
| 18 | 43 | 3 | 0.33333 | 0.043 | 0.25881 | 0.4293 |
| 19 | 40 | 4 | 0.3 | 0.0418 | 0.22826 | 0.3943 |
| 20 | 36 | 1 | 0.29167 | 0.0415 | 0.2207 | 0.3855 |
| 21 | 35 | 1 | 0.28333 | 0.0411 | 0.21317 | 0.3766 |
| 22 | 34 | 1 | 0.275 | 0.0408 | 0.20567 | 0.3677 |
| 23 | 33 | 3 | 0.25 | 0.0395 | 0.18338 | 0.3408 |
| 24 | 30 | 3 | 0.225 | 0.0381 | 0.16142 | 0.3136 |
| 25 | 27 | 3 | 0.2 | 0.0365 | 0.13984 | 0.286 |
| 26 | 24 | 3 | 0.175 | 0.0347 | 0.11867 | 0.2581 |
| 27 | 21 | 2 | 0.15833 | 0.0333 | 0.10481 | 0.2392 |
| 28 | 19 | 2 | 0.14167 | 0.0318 | 0.0912 | 0.2201 |
| 29 | 17 | 2 | 0.125 | 0.0302 | 0.07786 | 0.2007 |
| 33 | 15 | 1 | 0.11667 | 0.0293 | 0.07131 | 0.1909 |
| 34 | 14 | 1 | 0.10833 | 0.0284 | 0.06484 | 0.181 |
| 35 | 13 | 3 | 0.08333 | 0.0252 | 0.04604 | 0.1508 |
| 36 | 10 | 1 | 0.075 | 0.024 | 0.04001 | 0.1406 |
| 37 | 9 | 1 | 0.06667 | 0.0228 | 0.03413 | 0.1302 |
| 38 | 8 | 1 | 0.05833 | 0.0214 | 0.02843 | 0.1197 |
| 47 | 7 | 1 | 0.05 | 0.0199 | 0.02292 | 0.1091 |
| 48 | 6 | 1 | 0.04167 | 0.0182 | 0.01767 | 0.0983 |
| 49 | 5 | 1 | 0.03333 | 0.0164 | 0.01272 | 0.0874 |
| 50 | 4 | 1 | 0.025 | 0.0143 | 0.00818 | 0.0764 |
| 57 | 3 | 1 | 0.01667 | 0.0117 | 0.00422 | 0.0659 |
| 74 | 2 | 1 | 0.00833 | 0.0083 | 0.00118 | 0.0587 |
| 75 | 1 | 1 | 0 | NaN | NA | NA |

**Table S100.** Guney station Kaplan-Meier survival estimates according to SPI-12

| Kaplan-Meier Wet to Dry (SPI12) | | | | | | |
| --- | --- | --- | --- | --- | --- | --- |
|  |  | n | events | median | 0.95LCL | 0.95UCL |
|  |  | 109 | 109 | 26 | 20 | 34 |
| time | n.risk | n.event | survival | std.err | lower 95% CL | upper 95% CL |
| 1 | 109 | 4 | 0.9633 | 0.01801 | 0.92864 | 0.9993 |
| 2 | 105 | 5 | 0.91743 | 0.02636 | 0.86719 | 0.9706 |
| 3 | 100 | 5 | 0.87156 | 0.03205 | 0.81096 | 0.9367 |
| 4 | 95 | 2 | 0.85321 | 0.0339 | 0.78929 | 0.9223 |
| 5 | 93 | 1 | 0.84404 | 0.03475 | 0.7786 | 0.915 |
| 11 | 92 | 1 | 0.83486 | 0.03556 | 0.76799 | 0.9076 |
| 12 | 91 | 3 | 0.80734 | 0.03778 | 0.73659 | 0.8849 |
| 13 | 88 | 5 | 0.76147 | 0.04082 | 0.68552 | 0.8458 |
| 14 | 83 | 4 | 0.72477 | 0.04278 | 0.64559 | 0.8137 |
| 15 | 79 | 3 | 0.69725 | 0.04401 | 0.61612 | 0.7891 |
| 16 | 76 | 3 | 0.66972 | 0.04505 | 0.58701 | 0.7641 |
| 17 | 73 | 2 | 0.65138 | 0.04564 | 0.56779 | 0.7473 |
| 18 | 71 | 3 | 0.62385 | 0.0464 | 0.53923 | 0.7218 |
| 19 | 68 | 3 | 0.59633 | 0.04699 | 0.51098 | 0.6959 |
| 20 | 65 | 2 | 0.57798 | 0.04731 | 0.49232 | 0.6785 |
| 21 | 63 | 1 | 0.56881 | 0.04744 | 0.48304 | 0.6698 |
| 22 | 62 | 1 | 0.55963 | 0.04755 | 0.47378 | 0.661 |
| 23 | 61 | 1 | 0.55046 | 0.04765 | 0.46456 | 0.6522 |
| 24 | 60 | 2 | 0.53211 | 0.04779 | 0.44622 | 0.6345 |
| 25 | 58 | 2 | 0.51376 | 0.04787 | 0.428 | 0.6167 |
| 26 | 56 | 2 | 0.49541 | 0.04789 | 0.40991 | 0.5988 |
| 27 | 54 | 1 | 0.48624 | 0.04787 | 0.40091 | 0.5897 |
| 28 | 53 | 2 | 0.46789 | 0.04779 | 0.383 | 0.5716 |
| 29 | 51 | 2 | 0.44954 | 0.04765 | 0.36522 | 0.5533 |
| 30 | 49 | 1 | 0.44037 | 0.04755 | 0.35637 | 0.5442 |
| 31 | 48 | 1 | 0.43119 | 0.04744 | 0.34756 | 0.5349 |
| 32 | 47 | 1 | 0.42202 | 0.04731 | 0.33878 | 0.5257 |
| 33 | 46 | 1 | 0.41284 | 0.04716 | 0.33003 | 0.5164 |
| 34 | 45 | 2 | 0.3945 | 0.04681 | 0.31263 | 0.4978 |
| 35 | 43 | 1 | 0.38532 | 0.04661 | 0.30398 | 0.4884 |
| 36 | 42 | 2 | 0.36697 | 0.04617 | 0.28678 | 0.4696 |
| 37 | 40 | 2 | 0.34862 | 0.04564 | 0.26972 | 0.4506 |
| 38 | 38 | 2 | 0.33028 | 0.04505 | 0.2528 | 0.4315 |
| 39 | 36 | 2 | 0.31193 | 0.04437 | 0.23603 | 0.4122 |
| 40 | 34 | 2 | 0.29358 | 0.04362 | 0.21941 | 0.3928 |
| 41 | 32 | 2 | 0.27523 | 0.04278 | 0.20295 | 0.3732 |
| 42 | 30 | 1 | 0.26606 | 0.04233 | 0.19479 | 0.3634 |
| 43 | 29 | 1 | 0.25688 | 0.04185 | 0.18666 | 0.3535 |
| 44 | 28 | 1 | 0.24771 | 0.04135 | 0.17859 | 0.3436 |
| 45 | 27 | 1 | 0.23853 | 0.04082 | 0.17056 | 0.3336 |
| 46 | 26 | 1 | 0.22936 | 0.04027 | 0.16258 | 0.3236 |
| 47 | 25 | 2 | 0.21101 | 0.03908 | 0.14677 | 0.3034 |
| 48 | 23 | 3 | 0.18349 | 0.03707 | 0.12349 | 0.2726 |
| 49 | 20 | 1 | 0.17431 | 0.03634 | 0.11585 | 0.2623 |
| 50 | 19 | 1 | 0.16514 | 0.03556 | 0.10828 | 0.2519 |
| 51 | 18 | 1 | 0.15596 | 0.03475 | 0.10078 | 0.2414 |
| 52 | 17 | 1 | 0.14679 | 0.0339 | 0.09335 | 0.2308 |
| 53 | 16 | 1 | 0.13761 | 0.033 | 0.08601 | 0.2202 |
| 54 | 15 | 1 | 0.12844 | 0.03205 | 0.07876 | 0.2095 |
| 55 | 14 | 1 | 0.11927 | 0.03104 | 0.07161 | 0.1986 |
| 56 | 13 | 1 | 0.11009 | 0.02998 | 0.06456 | 0.1877 |
| 57 | 12 | 1 | 0.10092 | 0.02885 | 0.05763 | 0.1767 |
| 58 | 11 | 1 | 0.09174 | 0.02765 | 0.05082 | 0.1656 |
| 59 | 10 | 1 | 0.08257 | 0.02636 | 0.04416 | 0.1544 |
| 60 | 9 | 1 | 0.07339 | 0.02498 | 0.03767 | 0.143 |
| 82 | 8 | 1 | 0.06422 | 0.02348 | 0.03137 | 0.1315 |
| 83 | 7 | 1 | 0.05505 | 0.02185 | 0.02529 | 0.1198 |
| 87 | 6 | 1 | 0.04587 | 0.02004 | 0.01949 | 0.108 |
| 91 | 5 | 1 | 0.0367 | 0.01801 | 0.01403 | 0.096 |
| 92 | 4 | 1 | 0.02752 | 0.01567 | 0.00902 | 0.084 |
| 101 | 3 | 1 | 0.01835 | 0.01285 | 0.00465 | 0.0724 |
| 102 | 2 | 1 | 0.00917 | 0.00913 | 0.0013 | 0.0645 |
| 103 | 1 | 1 | 0 | NaN | NA | NA |

**Table S101.** Guney station Kaplan-Meier drought risk estimates according to SPI-3, 6, and 12

| Drought Risk (SPI3) | | Drought Risk (SPI6) | | Drought Risk (SPI12) | |
| --- | --- | --- | --- | --- | --- |
| Time | Drought Risk | Time | Drought Risk | Time | Drought Risk |
| 1 | 0.04478 | 1 | 0.03333 | 1 | 0.0367 |
| 2 | 0.07463 | 2 | 0.10833 | 2 | 0.08257 |
| 3 | 0.15672 | 3 | 0.19167 | 3 | 0.12844 |
| 4 | 0.23134 | 4 | 0.25 | 4 | 0.14679 |
| 5 | 0.29851 | 5 | 0.275 | 5 | 0.15596 |
| 6 | 0.33582 | 6 | 0.3 | 6 | 0.15749 |
| 7 | 0.38806 | 7 | 0.325 | 11 | 0.16514 |
| 8 | 0.46269 | 8 | 0.36667 | 12 | 0.19266 |
| 9 | 0.51493 | 9 | 0.39167 | 13 | 0.23853 |
| 10 | 0.55224 | 10 | 0.425 | 14 | 0.27523 |
| 11 | 0.60448 | 11 | 0.45 | 15 | 0.30275 |
| 12 | 0.64179 | 12 | 0.46667 | 16 | 0.33028 |
| 13 | 0.68657 | 13 | 0.49167 | 17 | 0.34862 |
| 14 | 0.71642 | 14 | 0.53333 | 18 | 0.37615 |
| 15 | 0.75373 | 15 | 0.56667 | 19 | 0.40367 |
| 16 | 0.79851 | 16 | 0.60833 | 20 | 0.42202 |
| 17 | 0.84328 | 17 | 0.64167 | 21 | 0.43119 |
| 18 | 0.86567 | 18 | 0.66667 | 22 | 0.44037 |
| 19 | 0.87313 | 19 | 0.7 | 23 | 0.44954 |
| 20 | 0.8806 | 20 | 0.70833 | 24 | 0.46789 |
| 21 | 0.88806 | 21 | 0.71667 | 25 | 0.48624 |
| 22 | 0.89552 | 22 | 0.725 | 26 | 0.50459 |
| 23 | 0.91045 | 23 | 0.75 | 27 | 0.51376 |
| 24 | 0.91791 | 24 | 0.775 | 28 | 0.53211 |
| 25 | 0.92537 | 25 | 0.8 | 29 | 0.55046 |
| 26 | 0.9403 | 26 | 0.825 | 30 | 0.55963 |
| 30 | 0.94776 | 27 | 0.84167 | 31 | 0.56881 |
| 31 | 0.95522 | 28 | 0.85833 | 32 | 0.57798 |
| 32 | 0.96269 | 29 | 0.875 | 33 | 0.58716 |
| 33 | 0.97015 | 33 | 0.88333 | 34 | 0.6055 |
| 40 | 0.97761 | 34 | 0.89167 | 35 | 0.61468 |
| 56 | 0.98507 | 35 | 0.91667 | 36 | 0.63303 |
| 57 | 0.99254 | 36 | 0.925 | 37 | 0.65138 |
| 58 | 1 | 37 | 0.93333 | 38 | 0.66972 |
|  |  | 38 | 0.94167 | 39 | 0.68807 |
|  |  | 47 | 0.95 | 40 | 0.70642 |
|  |  | 48 | 0.95833 | 41 | 0.72477 |
|  |  | 49 | 0.96667 | 42 | 0.73394 |
|  |  | 50 | 0.975 | 43 | 0.74312 |
|  |  | 57 | 0.98333 | 44 | 0.75229 |
|  |  | 74 | 0.99167 | 45 | 0.76147 |
|  |  | 75 | 1 | 46 | 0.77064 |
|  |  |  |  | 47 | 0.78899 |
|  |  |  |  | 48 | 0.81651 |
|  |  |  |  | 49 | 0.82569 |
|  |  |  |  | 50 | 0.83486 |
|  |  |  |  | 51 | 0.84404 |
|  |  |  |  | 52 | 0.85321 |
|  |  |  |  | 53 | 0.86239 |
|  |  |  |  | 54 | 0.87156 |
|  |  |  |  | 55 | 0.88073 |
|  |  |  |  | 56 | 0.88991 |
|  |  |  |  | 57 | 0.89908 |
|  |  |  |  | 58 | 0.90826 |
|  |  |  |  | 59 | 0.91743 |
|  |  |  |  | 60 | 0.92661 |
|  |  |  |  | 82 | 0.93578 |
|  |  |  |  | 83 | 0.94495 |
|  |  |  |  | 87 | 0.95413 |
|  |  |  |  | 91 | 0.9633 |
|  |  |  |  | 92 | 0.97248 |
|  |  |  |  | 101 | 0.98165 |
|  |  |  |  | 102 | 0.99083 |
|  |  |  |  | 103 | 1 |

**Table S102.** Guney station Kaplan-Meier survival estimates according to SPEI-3

| Kaplan-Meier Wet to Dry (SPEI3) | | | | | | | |
| --- | --- | --- | --- | --- | --- | --- | --- |
|  |  | n | events | median | 0.95LCL | 0.95UCL |
|  |  | 88 | 88 | 8.5 | 7 | 10 |
| time | n.risk | n.event | survival | std.err | lower 95% CI | upper 95% CI |
| 1 | 88 | 3 | 0.9659 | 0.0193 | 0.92873 | 10.000 |
| 2 | 85 | 2 | 0.9432 | 0.0247 | 0.89603 | 0.9928 |
| 3 | 83 | 5 | 0.8864 | 0.0338 | 0.82247 | 0.9552 |
| 4 | 78 | 5 | 0.8295 | 0.0401 | 0.75459 | 0.912 |
| 5 | 73 | 6 | 0.7614 | 0.0454 | 0.67732 | 0.8558 |
| 6 | 67 | 5 | 0.7045 | 0.0486 | 0.61539 | 0.8066 |
| 7 | 62 | 10 | 0.5909 | 0.0524 | 0.49662 | 0.7031 |
| 8 | 52 | 8 | 0.5 | 0.0533 | 0.40572 | 0.6162 |
| 9 | 44 | 10 | 0.3864 | 0.0519 | 0.29692 | 0.5027 |
| 10 | 34 | 6 | 0.3182 | 0.0497 | 0.23434 | 0.432 |
| 11 | 28 | 4 | 0.2727 | 0.0475 | 0.19389 | 0.3836 |
| 12 | 24 | 2 | 0.25 | 0.0462 | 0.17409 | 0.359 |
| 13 | 22 | 4 | 0.2045 | 0.043 | 0.13547 | 0.3088 |
| 14 | 18 | 4 | 0.1591 | 0.039 | 0.09841 | 0.2572 |
| 15 | 14 | 1 | 0.1477 | 0.0378 | 0.08944 | 0.244 |
| 16 | 13 | 2 | 0.125 | 0.0353 | 0.07192 | 0.2173 |
| 18 | 11 | 1 | 0.1136 | 0.0338 | 0.0634 | 0.2037 |
| 19 | 10 | 1 | 0.1023 | 0.0323 | 0.05507 | 0.1899 |
| 20 | 9 | 2 | 0.0795 | 0.0288 | 0.03908 | 0.1619 |
| 21 | 7 | 2 | 0.0568 | 0.0247 | 0.02425 | 0.1331 |
| 22 | 5 | 3 | 0.0227 | 0.0159 | 0.00577 | 0.0894 |
| 31 | 2 | 1 | 0.0114 | 0.0113 | 0.00162 | 0.0798 |
| 48 | 1 | 1 | 0 | NaN | NA | NA |

**Table S103.** Guney station Kaplan-Meier survival estimates according to SPEI-6

| Kaplan-Meier Wet to Dry (SPEI6) | | | | | | | |
| --- | --- | --- | --- | --- | --- | --- | --- |
|  |  | n | events | median | 0.95LCL | 0.95UCL |
|  |  | 87 | 87 | 11 | 10 | 12 |
| time | n.risk | n.event | survival | std.err | lower 95% CI | upper 95% CI |
| 1 | 87 | 5 | 0.9425 | 0.025 | 0.89487 | 0.9927 |
| 2 | 82 | 4 | 0.8966 | 0.0327 | 0.83479 | 0.9629 |
| 3 | 78 | 3 | 0.8621 | 0.037 | 0.79257 | 0.9377 |
| 4 | 75 | 3 | 0.8276 | 0.0405 | 0.7519 | 0.9109 |
| 5 | 72 | 2 | 0.8046 | 0.0425 | 0.72545 | 0.8924 |
| 6 | 70 | 3 | 0.7701 | 0.0451 | 0.68659 | 0.8638 |
| 7 | 67 | 3 | 0.7356 | 0.0473 | 0.64856 | 0.8344 |
| 8 | 64 | 6 | 0.6667 | 0.0505 | 0.57462 | 0.7735 |
| 9 | 58 | 6 | 0.5977 | 0.0526 | 0.50305 | 0.7102 |
| 10 | 52 | 8 | 0.5057 | 0.0536 | 0.41088 | 0.6225 |
| 11 | 44 | 7 | 0.4253 | 0.053 | 0.33312 | 0.543 |
| 12 | 37 | 4 | 0.3793 | 0.052 | 0.28991 | 0.4963 |
| 13 | 33 | 3 | 0.3448 | 0.051 | 0.25811 | 0.4607 |
| 14 | 30 | 2 | 0.3218 | 0.0501 | 0.23723 | 0.4366 |
| 15 | 28 | 3 | 0.2874 | 0.0485 | 0.2064 | 0.4001 |
| 16 | 25 | 2 | 0.2644 | 0.0473 | 0.1862 | 0.3754 |
| 17 | 23 | 4 | 0.2184 | 0.0443 | 0.14675 | 0.325 |
| 18 | 19 | 3 | 0.1839 | 0.0415 | 0.11813 | 0.2863 |
| 19 | 16 | 2 | 0.1609 | 0.0394 | 0.09959 | 0.26 |
| 20 | 14 | 1 | 0.1494 | 0.0382 | 0.09051 | 0.2467 |
| 21 | 13 | 2 | 0.1264 | 0.0356 | 0.07278 | 0.2197 |
| 22 | 11 | 3 | 0.092 | 0.031 | 0.04751 | 0.178 |
| 23 | 8 | 3 | 0.0575 | 0.025 | 0.02454 | 0.1346 |
| 24 | 5 | 1 | 0.046 | 0.0225 | 0.01765 | 0.1197 |
| 26 | 4 | 1 | 0.0345 | 0.0196 | 0.01134 | 0.1048 |
| 27 | 3 | 1 | 0.023 | 0.0161 | 0.00584 | 0.0905 |
| 28 | 2 | 1 | 0.0115 | 0.0114 | 0.00164 | 0.0807 |
| 75 | 1 | 1 | 0 | NaN | NA | NA |

**Table S104.** Guney station Kaplan-Meier survival estimates according to SPEI-12

| Kaplan-Meier Wet to Dry (SPEI12) | | | | | | | |
| --- | --- | --- | --- | --- | --- | --- | --- |
|  |  | n | events | median | 0.95LCL | 0.95UCL |
|  |  | 57 | 57 | 32 | 25 | 37 |
| time | n.risk | n.event | survival | std.err | lower 95% CI | upper 95% CI |
| 1 | 57 | 2 | 0.9649 | 0.0244 | 0.91831 | 1.000 |
| 2 | 55 | 1 | 0.9474 | 0.0296 | 0.89114 | 1.000 |
| 9 | 54 | 1 | 0.9298 | 0.0338 | 0.86582 | 0.999 |
| 10 | 53 | 1 | 0.9123 | 0.0375 | 0.84172 | 0.989 |
| 11 | 52 | 1 | 0.8947 | 0.0406 | 0.81851 | 0.978 |
| 12 | 51 | 2 | 0.8596 | 0.046 | 0.77404 | 0.955 |
| 13 | 49 | 2 | 0.8246 | 0.0504 | 0.73151 | 0.929 |
| 14 | 47 | 3 | 0.7719 | 0.0556 | 0.67034 | 0.889 |
| 15 | 44 | 3 | 0.7193 | 0.0595 | 0.61162 | 0.846 |
| 16 | 41 | 2 | 0.6842 | 0.0616 | 0.57358 | 0.816 |
| 17 | 39 | 1 | 0.6667 | 0.0624 | 0.55486 | 0.801 |
| 18 | 38 | 1 | 0.6491 | 0.0632 | 0.53633 | 0.786 |
| 19 | 37 | 1 | 0.6316 | 0.0639 | 0.51799 | 0.77 |
| 25 | 36 | 1 | 0.614 | 0.0645 | 0.49981 | 0.754 |
| 26 | 35 | 1 | 0.5965 | 0.065 | 0.48181 | 0.738 |
| 27 | 34 | 1 | 0.5789 | 0.0654 | 0.46397 | 0.722 |
| 28 | 33 | 1 | 0.5614 | 0.0657 | 0.4463 | 0.706 |
| 29 | 32 | 1 | 0.5439 | 0.066 | 0.42878 | 0.69 |
| 30 | 31 | 1 | 0.5263 | 0.0661 | 0.41142 | 0.673 |
| 31 | 30 | 1 | 0.5088 | 0.0662 | 0.39422 | 0.657 |
| 32 | 29 | 1 | 0.4912 | 0.0662 | 0.37718 | 0.64 |
| 33 | 28 | 1 | 0.4737 | 0.0661 | 0.36028 | 0.623 |
| 34 | 27 | 1 | 0.4561 | 0.066 | 0.34355 | 0.606 |
| 35 | 26 | 1 | 0.4386 | 0.0657 | 0.32697 | 0.588 |
| 36 | 25 | 3 | 0.386 | 0.0645 | 0.27819 | 0.535 |
| 37 | 22 | 3 | 0.3333 | 0.0624 | 0.23091 | 0.481 |
| 38 | 19 | 3 | 0.2807 | 0.0595 | 0.18525 | 0.425 |
| 39 | 16 | 2 | 0.2456 | 0.057 | 0.15583 | 0.387 |
| 40 | 14 | 1 | 0.2281 | 0.0556 | 0.14146 | 0.368 |
| 41 | 13 | 1 | 0.2105 | 0.054 | 0.12734 | 0.348 |
| 42 | 12 | 1 | 0.193 | 0.0523 | 0.11349 | 0.328 |
| 43 | 11 | 1 | 0.1754 | 0.0504 | 0.09993 | 0.308 |
| 44 | 10 | 2 | 0.1404 | 0.046 | 0.07382 | 0.267 |
| 45 | 8 | 1 | 0.1228 | 0.0435 | 0.06136 | 0.246 |
| 46 | 7 | 1 | 0.1053 | 0.0406 | 0.04938 | 0.224 |
| 47 | 6 | 1 | 0.0877 | 0.0375 | 0.03798 | 0.203 |
| 48 | 5 | 1 | 0.0702 | 0.0338 | 0.02728 | 0.181 |
| 56 | 4 | 1 | 0.0526 | 0.0296 | 0.01749 | 0.158 |
| 106 | 3 | 1 | 0.0351 | 0.0244 | 0.00899 | 0.137 |
| 107 | 2 | 1 | 0.0175 | 0.0174 | 0.00251 | 0.122 |
| 120 | 1 | 1 | 0 | NaN | NA | NA |

**Table S105.** Guney station Kaplan-Meier drought risk estimates according to SPEI-3, 6, and 12

| Drought Risk (SPEI3) | | Drought Risk (SPEI6) | | Drought Risk (SPEI12) | |
| --- | --- | --- | --- | --- | --- |
| Time | Drought Risk | Time | Drought Risk | Time | Drought Risk |
| 1 | 0.0341 | 1 | 0.0575 | 1 | 0.0351 |
| 2 | 0.0568 | 2 | 0.1034 | 2 | 0.0526 |
| 3 | 0.1136 | 3 | 0.1379 | 9 | 0.0702 |
| 4 | 0.1705 | 4 | 0.1724 | 10 | 0.0877 |
| 5 | 0.2386 | 5 | 0.1954 | 11 | 0.1053 |
| 6 | 0.2955 | 6 | 0.2299 | 12 | 0.1404 |
| 7 | 0.4091 | 7 | 0.2644 | 13 | 0.1754 |
| 8 | 0.5 | 8 | 0.3333 | 14 | 0.2281 |
| 9 | 0.6136 | 9 | 0.4023 | 15 | 0.2807 |
| 10 | 0.6818 | 10 | 0.4943 | 16 | 0.3158 |
| 11 | 0.7273 | 11 | 0.5747 | 17 | 0.3333 |
| 12 | 0.75 | 12 | 0.6207 | 18 | 0.3509 |
| 13 | 0.7955 | 13 | 0.6552 | 19 | 0.3684 |
| 14 | 0.8409 | 14 | 0.6782 | 25 | 0.386 |
| 15 | 0.8523 | 15 | 0.7126 | 26 | 0.4035 |
| 16 | 0.875 | 16 | 0.7356 | 27 | 0.4211 |
| 18 | 0.8864 | 17 | 0.7816 | 28 | 0.4386 |
| 19 | 0.8977 | 18 | 0.8161 | 29 | 0.4561 |
| 20 | 0.9205 | 19 | 0.8391 | 30 | 0.4737 |
| 21 | 0.9432 | 20 | 0.8506 | 31 | 0.4912 |
| 22 | 0.9773 | 21 | 0.8736 | 32 | 0.5088 |
| 31 | 0.9886 | 22 | 0.908 | 33 | 0.5263 |
| 48 | 1 | 23 | 0.9425 | 34 | 0.5439 |
|  |  | 24 | 0.954 | 35 | 0.5614 |
|  |  | 26 | 0.9655 | 36 | 0.614 |
|  |  | 27 | 0.977 | 37 | 0.6667 |
|  |  | 28 | 0.9885 | 38 | 0.7193 |
|  |  | 75 | 1 | 39 | 0.7544 |
|  |  |  |  | 40 | 0.7719 |
|  |  |  |  | 41 | 0.7895 |
|  |  |  |  | 42 | 0.807 |
|  |  |  |  | 43 | 0.8246 |
|  |  |  |  | 44 | 0.8596 |
|  |  |  |  | 45 | 0.8772 |
|  |  |  |  | 46 | 0.8947 |
|  |  |  |  | 47 | 0.9123 |
|  |  |  |  | 48 | 0.9298 |
|  |  |  |  | 56 | 0.9474 |
|  |  |  |  | 106 | 0.9649 |
|  |  |  |  | 107 | 0.9825 |
|  |  |  |  | 120 | 1 |

**Table S106.** Kinik station Kaplan-Meier survival estimates according to SPI-3

| Kaplan-Meier Wet to Dry (SPI3) | | | | | | |
| --- | --- | --- | --- | --- | --- | --- |
|  |  | n | events | median | 0.95LCL | 0.95UCL |
|  |  | 62 | 62 | 6 | 5 | 9 |
| time | n.risk | n.event | survival | std.err | lower 95% CL | upper 95% CL |
| 1 | 62 | 4 | 0.9355 | 0.0312 | 0.87629 | 0.999 |
| 2 | 58 | 3 | 0.8871 | 0.0402 | 0.81172 | 0.969 |
| 3 | 55 | 7 | 0.7742 | 0.0531 | 0.67681 | 0.886 |
| 4 | 48 | 6 | 0.6774 | 0.0594 | 0.57051 | 0.804 |
| 5 | 42 | 9 | 0.5323 | 0.0634 | 0.42149 | 0.672 |
| 6 | 33 | 3 | 0.4839 | 0.0635 | 0.37418 | 0.626 |
| 7 | 30 | 3 | 0.4355 | 0.063 | 0.32801 | 0.578 |
| 8 | 27 | 4 | 0.371 | 0.0613 | 0.26827 | 0.513 |
| 9 | 23 | 3 | 0.3226 | 0.0594 | 0.2249 | 0.463 |
| 10 | 20 | 3 | 0.2742 | 0.0567 | 0.18288 | 0.411 |
| 11 | 17 | 2 | 0.2419 | 0.0544 | 0.15572 | 0.376 |
| 12 | 15 | 1 | 0.2258 | 0.0531 | 0.14242 | 0.358 |
| 13 | 14 | 3 | 0.1774 | 0.0485 | 0.10381 | 0.303 |
| 14 | 11 | 1 | 0.1613 | 0.0467 | 0.09143 | 0.285 |
| 16 | 10 | 1 | 0.1452 | 0.0447 | 0.07934 | 0.266 |
| 18 | 9 | 1 | 0.129 | 0.0426 | 0.06758 | 0.246 |
| 21 | 8 | 1 | 0.1129 | 0.0402 | 0.05619 | 0.227 |
| 22 | 7 | 1 | 0.0968 | 0.0375 | 0.04524 | 0.207 |
| 23 | 6 | 1 | 0.0806 | 0.0346 | 0.0348 | 0.187 |
| 24 | 5 | 1 | 0.0645 | 0.0312 | 0.025 | 0.166 |
| 25 | 4 | 1 | 0.0484 | 0.0273 | 0.01604 | 0.146 |
| 27 | 3 | 1 | 0.0323 | 0.0224 | 0.00825 | 0.126 |
| 34 | 2 | 1 | 0.0161 | 0.016 | 0.00231 | 0.113 |
| 35 | 1 | 1 | 0 | NaN | NA | NA |

**Table S107.** Kinik station Kaplan-Meier survival estimates according to SPI-6

| Kaplan-Meier Wet to Dry (SPI6) | | | | | | |
| --- | --- | --- | --- | --- | --- | --- |
|  |  | n | events | median | 0.95LCL | 0.95UCL |
|  |  | 70 | 70 | 12 | 10 | 15 |
| time | n.risk | n.event | survival | std.err | lower 95% CL | upper 95% CL |
| 1 | 70 | 5 | 0.9286 | 0.0308 | 0.87016 | 0.991 |
| 2 | 65 | 6 | 0.8429 | 0.0435 | 0.76177 | 0.933 |
| 3 | 59 | 3 | 0.8 | 0.0478 | 0.71158 | 0.899 |
| 4 | 56 | 3 | 0.7571 | 0.0513 | 0.66307 | 0.865 |
| 5 | 53 | 1 | 0.7429 | 0.0522 | 0.64721 | 0.853 |
| 6 | 52 | 2 | 0.7143 | 0.054 | 0.61592 | 0.828 |
| 7 | 50 | 2 | 0.6857 | 0.0555 | 0.58515 | 0.804 |
| 8 | 48 | 2 | 0.6571 | 0.0567 | 0.55485 | 0.778 |
| 9 | 46 | 3 | 0.6143 | 0.0582 | 0.51021 | 0.74 |
| 10 | 43 | 3 | 0.5714 | 0.0591 | 0.4665 | 0.7 |
| 11 | 40 | 3 | 0.5286 | 0.0597 | 0.42366 | 0.659 |
| 12 | 37 | 4 | 0.4714 | 0.0597 | 0.36786 | 0.604 |
| 13 | 33 | 3 | 0.4286 | 0.0591 | 0.327 | 0.562 |
| 14 | 30 | 3 | 0.3857 | 0.0582 | 0.287 | 0.518 |
| 15 | 27 | 2 | 0.3571 | 0.0573 | 0.26082 | 0.489 |
| 16 | 25 | 1 | 0.3429 | 0.0567 | 0.24789 | 0.474 |
| 17 | 24 | 2 | 0.3143 | 0.0555 | 0.22236 | 0.444 |
| 18 | 22 | 2 | 0.2857 | 0.054 | 0.19727 | 0.414 |
| 19 | 20 | 3 | 0.2429 | 0.0513 | 0.16059 | 0.367 |
| 20 | 17 | 2 | 0.2143 | 0.049 | 0.13683 | 0.336 |
| 21 | 15 | 2 | 0.1857 | 0.0465 | 0.11371 | 0.303 |
| 22 | 13 | 2 | 0.1571 | 0.0435 | 0.09134 | 0.27 |
| 23 | 11 | 3 | 0.1143 | 0.038 | 0.05953 | 0.219 |
| 24 | 8 | 2 | 0.0857 | 0.0335 | 0.03988 | 0.184 |
| 25 | 6 | 1 | 0.0714 | 0.0308 | 0.03069 | 0.166 |
| 26 | 5 | 1 | 0.0571 | 0.0277 | 0.02206 | 0.148 |
| 27 | 4 | 1 | 0.0429 | 0.0242 | 0.01417 | 0.13 |
| 37 | 3 | 2 | 0.0143 | 0.0142 | 0.00204 | 0.1 |
| 38 | 1 | 1 | 0 | NaN | NA | NA |

**Table S108.** Kinik station Kaplan-Meier survival estimates according to SPI-12

| Kaplan-Meier Wet to Dry (SPI12) | | | | | | |
| --- | --- | --- | --- | --- | --- | --- |
|  |  | n | events | median | 0.95LCL | 0.95UCL |
|  |  | 60 | 60 | 15.5 | 13 | 20 |
| time | n.risk | n.event | survival | std.err | lower 95% CL | upper 95% CL |
| 1 | 60 | 1 | 0.9833 | 0.0165 | 0.95147 | 1 |
| 2 | 59 | 2 | 0.95 | 0.0281 | 0.89642 | 1 |
| 3 | 57 | 2 | 0.9167 | 0.0357 | 0.84933 | 0.989 |
| 4 | 55 | 1 | 0.9 | 0.0387 | 0.8272 | 0.979 |
| 5 | 54 | 2 | 0.8667 | 0.0439 | 0.78478 | 0.957 |
| 6 | 52 | 1 | 0.85 | 0.0461 | 0.76429 | 0.945 |
| 7 | 51 | 2 | 0.8167 | 0.05 | 0.7244 | 0.921 |
| 8 | 49 | 2 | 0.7833 | 0.0532 | 0.68573 | 0.895 |
| 9 | 47 | 2 | 0.75 | 0.0559 | 0.64806 | 0.868 |
| 10 | 45 | 2 | 0.7167 | 0.0582 | 0.61125 | 0.84 |
| 11 | 43 | 2 | 0.6833 | 0.0601 | 0.57521 | 0.812 |
| 12 | 41 | 4 | 0.6167 | 0.0628 | 0.50514 | 0.753 |
| 13 | 37 | 3 | 0.5667 | 0.064 | 0.45418 | 0.707 |
| 14 | 34 | 2 | 0.5333 | 0.0644 | 0.42093 | 0.676 |
| 15 | 32 | 2 | 0.5 | 0.0645 | 0.38822 | 0.644 |
| 16 | 30 | 2 | 0.4667 | 0.0644 | 0.35607 | 0.612 |
| 17 | 28 | 2 | 0.4333 | 0.064 | 0.32446 | 0.579 |
| 18 | 26 | 2 | 0.4 | 0.0632 | 0.29341 | 0.545 |
| 19 | 24 | 2 | 0.3667 | 0.0622 | 0.26293 | 0.511 |
| 20 | 22 | 2 | 0.3333 | 0.0609 | 0.23306 | 0.477 |
| 21 | 20 | 1 | 0.3167 | 0.0601 | 0.21836 | 0.459 |
| 22 | 19 | 1 | 0.3 | 0.0592 | 0.20383 | 0.442 |
| 36 | 18 | 1 | 0.2833 | 0.0582 | 0.18946 | 0.424 |
| 38 | 17 | 1 | 0.2667 | 0.0571 | 0.17528 | 0.406 |
| 39 | 16 | 1 | 0.25 | 0.0559 | 0.16129 | 0.388 |
| 40 | 15 | 1 | 0.2333 | 0.0546 | 0.1475 | 0.369 |
| 41 | 14 | 1 | 0.2167 | 0.0532 | 0.13392 | 0.351 |
| 42 | 13 | 1 | 0.2 | 0.0516 | 0.12057 | 0.332 |
| 43 | 12 | 1 | 0.1833 | 0.05 | 0.10748 | 0.313 |
| 44 | 11 | 1 | 0.1667 | 0.0481 | 0.09465 | 0.293 |
| 50 | 10 | 1 | 0.15 | 0.0461 | 0.08213 | 0.274 |
| 155 | 9 | 1 | 0.1333 | 0.0439 | 0.06995 | 0.254 |
| 156 | 8 | 1 | 0.1167 | 0.0414 | 0.05815 | 0.234 |
| 157 | 7 | 1 | 0.1 | 0.0387 | 0.04681 | 0.214 |
| 158 | 6 | 1 | 0.0833 | 0.0357 | 0.036 | 0.193 |
| 159 | 5 | 1 | 0.0667 | 0.0322 | 0.02587 | 0.172 |
| 160 | 4 | 1 | 0.05 | 0.0281 | 0.01659 | 0.151 |
| 161 | 3 | 1 | 0.0333 | 0.0232 | 0.00853 | 0.13 |
| 162 | 2 | 1 | 0.0167 | 0.0165 | 0.00239 | 0.116 |
| 163 | 1 | 1 | 0 | NaN | NA | NA |

**Table S109.** Kinik station Kaplan-Meier drought risk estimates according to SPI-3, 6, and 12

| Drought Risk (SPI3) | | Drought Risk (SPI6) | | Drought Risk (SPI12) | |
| --- | --- | --- | --- | --- | --- |
| Time | Drought Risk | Time | Drought Risk | Time | Drought Risk |
| 1 | 0.0645 | 1 | 0.0714 | 1 | 0.0167 |
| 2 | 0.1129 | 2 | 0.1571 | 2 | 0.05 |
| 3 | 0.2258 | 3 | 0.2 | 3 | 0.0833 |
| 4 | 0.3226 | 4 | 0.2429 | 4 | 0.1 |
| 5 | 0.4677 | 5 | 0.2571 | 5 | 0.1333 |
| 6 | 0.5161 | 6 | 0.2857 | 6 | 0.15 |
| 7 | 0.5645 | 7 | 0.3143 | 7 | 0.1833 |
| 8 | 0.629 | 8 | 0.3429 | 8 | 0.2167 |
| 9 | 0.6774 | 9 | 0.3857 | 9 | 0.25 |
| 10 | 0.7258 | 10 | 0.4286 | 10 | 0.2833 |
| 11 | 0.7581 | 11 | 0.4714 | 11 | 0.3167 |
| 12 | 0.7742 | 12 | 0.5286 | 12 | 0.3833 |
| 13 | 0.8226 | 13 | 0.5714 | 13 | 0.4333 |
| 14 | 0.8387 | 14 | 0.6143 | 14 | 0.4667 |
| 16 | 0.8548 | 15 | 0.6429 | 15 | 0.5 |
| 18 | 0.871 | 16 | 0.6571 | 16 | 0.5333 |
| 21 | 0.8871 | 17 | 0.6857 | 17 | 0.5667 |
| 22 | 0.9032 | 18 | 0.7143 | 18 | 0.6 |
| 23 | 0.9194 | 19 | 0.7571 | 19 | 0.6333 |
| 24 | 0.9355 | 20 | 0.7857 | 20 | 0.6667 |
| 25 | 0.9516 | 21 | 0.8143 | 21 | 0.6833 |
| 27 | 0.9677 | 22 | 0.8429 | 22 | 0.7 |
| 34 | 0.9839 | 23 | 0.8857 | 36 | 0.7167 |
| 35 | 1 | 24 | 0.9143 | 38 | 0.7333 |
|  |  | 25 | 0.9286 | 39 | 0.75 |
|  |  | 26 | 0.9429 | 40 | 0.7667 |
|  |  | 27 | 0.9571 | 41 | 0.7833 |
|  |  | 37 | 0.9857 | 42 | 0.8 |
|  |  | 38 | 1 | 43 | 0.8167 |
|  |  |  |  | 44 | 0.8333 |
|  |  |  |  | 50 | 0.85 |
|  |  |  |  | 155 | 0.8667 |
|  |  |  |  | 156 | 0.8833 |
|  |  |  |  | 157 | 0.9 |
|  |  |  |  | 158 | 0.9167 |
|  |  |  |  | 159 | 0.9333 |
|  |  |  |  | 160 | 0.95 |
|  |  |  |  | 161 | 0.9667 |
|  |  |  |  | 162 | 0.9833 |
|  |  |  |  | 163 | 1 |

**Table S110.** Kinik station Kaplan-Meier survival estimates according to SPEI-3

| Kaplan-Meier Wet to Dry (SPEI3) | | | | | | | |
| --- | --- | --- | --- | --- | --- | --- | --- |
|  |  | n | events | median | 0.95LCL | 0.95UCL |
|  |  | 75 | 75 | 5 | 4 | 9 |
| time | n.risk | n.event | survival | std.err | lower 95% CI | upper 95% CI |
| 1 | 75 | 3 | 0.96 | 0.0226 | 0.91666 | 10.000 |
| 2 | 72 | 7 | 0.8667 | 0.0393 | 0.79305 | 0.9471 |
| 3 | 65 | 11 | 0.72 | 0.0518 | 0.62523 | 0.8291 |
| 4 | 54 | 11 | 0.5733 | 0.0571 | 0.47165 | 0.6969 |
| 5 | 43 | 8 | 0.4667 | 0.0576 | 0.36638 | 0.5944 |
| 6 | 35 | 2 | 0.44 | 0.0573 | 0.34085 | 0.568 |
| 7 | 33 | 2 | 0.4133 | 0.0569 | 0.31565 | 0.5412 |
| 8 | 31 | 3 | 0.3733 | 0.0559 | 0.27845 | 0.5005 |
| 9 | 28 | 3 | 0.3333 | 0.0544 | 0.24203 | 0.4591 |
| 10 | 25 | 5 | 0.2667 | 0.0511 | 0.18322 | 0.3881 |
| 11 | 20 | 5 | 0.2 | 0.0462 | 0.12719 | 0.3145 |
| 12 | 15 | 3 | 0.16 | 0.0423 | 0.09526 | 0.2687 |
| 14 | 12 | 1 | 0.1467 | 0.0409 | 0.08497 | 0.2532 |
| 15 | 11 | 1 | 0.1333 | 0.0393 | 0.07488 | 0.2374 |
| 16 | 10 | 1 | 0.12 | 0.0375 | 0.06502 | 0.2215 |
| 18 | 9 | 2 | 0.0933 | 0.0336 | 0.0461 | 0.189 |
| 19 | 7 | 1 | 0.08 | 0.0313 | 0.03713 | 0.1723 |
| 24 | 6 | 1 | 0.0667 | 0.0288 | 0.02859 | 0.1555 |
| 27 | 5 | 1 | 0.0533 | 0.0259 | 0.02055 | 0.1384 |
| 29 | 4 | 1 | 0.04 | 0.0226 | 0.0132 | 0.1212 |
| 37 | 3 | 1 | 0.0267 | 0.0186 | 0.00679 | 0.1047 |
| 38 | 2 | 1 | 0.0133 | 0.0132 | 0.0019 | 0.0934 |
| 39 | 1 | 1 | 0 | NaN | NA | NA |

**Table S111.** Kinik station Kaplan-Meier survival estimates according to SPEI-6

| Kaplan-Meier Wet to Dry (SPEI6) | | | | | | | |
| --- | --- | --- | --- | --- | --- | --- | --- |
|  |  | n | events | median | 0.95LCL | 0.95UCL |
|  |  | 71 | 71 | 14 | 12 | 18 |
| time | n.risk | n.event | survival | std.err | lower 95% CI | upper 95% CI |
| 1 | 71 | 4 | 0.9437 | 0.0274 | 0.89153 | 0.9988 |
| 2 | 67 | 3 | 0.9014 | 0.0354 | 0.83467 | 0.9735 |
| 3 | 64 | 3 | 0.8592 | 0.0413 | 0.78193 | 0.944 |
| 4 | 61 | 4 | 0.8028 | 0.0472 | 0.71541 | 0.9009 |
| 6 | 57 | 1 | 0.7887 | 0.0484 | 0.69927 | 0.8896 |
| 7 | 56 | 1 | 0.7746 | 0.0496 | 0.68331 | 0.8782 |
| 8 | 55 | 1 | 0.7606 | 0.0506 | 0.66751 | 0.8666 |
| 9 | 54 | 3 | 0.7183 | 0.0534 | 0.62094 | 0.8309 |
| 10 | 51 | 4 | 0.662 | 0.0561 | 0.5606 | 0.7817 |
| 11 | 47 | 3 | 0.6197 | 0.0576 | 0.51649 | 0.7436 |
| 12 | 44 | 3 | 0.5775 | 0.0586 | 0.47328 | 0.7046 |
| 13 | 41 | 3 | 0.5352 | 0.0592 | 0.43091 | 0.6648 |
| 14 | 38 | 3 | 0.493 | 0.0593 | 0.38937 | 0.6241 |
| 15 | 35 | 3 | 0.4507 | 0.059 | 0.34863 | 0.5827 |
| 16 | 32 | 2 | 0.4225 | 0.0586 | 0.32193 | 0.5546 |
| 17 | 30 | 3 | 0.3803 | 0.0576 | 0.28258 | 0.5118 |
| 18 | 27 | 3 | 0.338 | 0.0561 | 0.24411 | 0.4681 |
| 19 | 24 | 3 | 0.2958 | 0.0542 | 0.20658 | 0.4235 |
| 20 | 21 | 3 | 0.2535 | 0.0516 | 0.17009 | 0.3779 |
| 21 | 18 | 2 | 0.2254 | 0.0496 | 0.14641 | 0.3469 |
| 22 | 16 | 1 | 0.2113 | 0.0484 | 0.13479 | 0.3311 |
| 23 | 15 | 1 | 0.1972 | 0.0472 | 0.12332 | 0.3153 |
| 24 | 14 | 1 | 0.1831 | 0.0459 | 0.11202 | 0.2993 |
| 27 | 13 | 1 | 0.169 | 0.0445 | 0.10091 | 0.2831 |
| 28 | 12 | 2 | 0.1408 | 0.0413 | 0.07929 | 0.2502 |
| 36 | 10 | 1 | 0.1268 | 0.0395 | 0.06884 | 0.2334 |
| 37 | 9 | 1 | 0.1127 | 0.0375 | 0.05866 | 0.2164 |
| 38 | 8 | 1 | 0.0986 | 0.0354 | 0.0488 | 0.1992 |
| 39 | 7 | 1 | 0.0845 | 0.033 | 0.0393 | 0.1817 |
| 40 | 6 | 1 | 0.0704 | 0.0304 | 0.03025 | 0.164 |
| 41 | 5 | 1 | 0.0563 | 0.0274 | 0.02175 | 0.146 |
| 42 | 4 | 1 | 0.0423 | 0.0239 | 0.01396 | 0.1279 |
| 43 | 3 | 1 | 0.0282 | 0.0196 | 0.00718 | 0.1104 |
| 112 | 2 | 1 | 0.0141 | 0.014 | 0.00201 | 0.0986 |
| 113 | 1 | 1 | 0 | NaN | NA | NA |

**Table S112.** Kinik station Kaplan-Meier survival estimates according to SPEI-12

| Kaplan-Meier Wet to Dry (SPEI12) | | | | | | | |
| --- | --- | --- | --- | --- | --- | --- | --- |
|  |  | n | events | median | 0.95LCL | 0.95UCL |
|  |  | 66 | 66 | 17 | 13 | 23 |
| time | n.risk | n.event | survival | std.err | lower 95% CI | upper 95% CI |
| 1 | 66 | 1 | 0.9848 | 0.015 | 0.95581 | 1.000 |
| 2 | 65 | 2 | 0.9545 | 0.0256 | 0.90559 | 1.000 |
| 3 | 63 | 2 | 0.9242 | 0.0326 | 0.86256 | 0.99 |
| 4 | 61 | 1 | 0.9091 | 0.0354 | 0.84231 | 0.981 |
| 5 | 60 | 2 | 0.8788 | 0.0402 | 0.80347 | 0.961 |
| 6 | 58 | 1 | 0.8636 | 0.0422 | 0.78469 | 0.951 |
| 7 | 57 | 2 | 0.8333 | 0.0459 | 0.7481 | 0.928 |
| 8 | 55 | 2 | 0.803 | 0.049 | 0.71259 | 0.905 |
| 9 | 53 | 2 | 0.7727 | 0.0516 | 0.67796 | 0.881 |
| 10 | 51 | 3 | 0.7273 | 0.0548 | 0.62739 | 0.843 |
| 11 | 48 | 3 | 0.6818 | 0.0573 | 0.57822 | 0.804 |
| 12 | 45 | 3 | 0.6364 | 0.0592 | 0.53028 | 0.764 |
| 13 | 42 | 2 | 0.6061 | 0.0601 | 0.49893 | 0.736 |
| 14 | 40 | 2 | 0.5758 | 0.0608 | 0.46806 | 0.708 |
| 15 | 38 | 2 | 0.5455 | 0.0613 | 0.43763 | 0.68 |
| 16 | 36 | 2 | 0.5152 | 0.0615 | 0.40765 | 0.651 |
| 17 | 34 | 2 | 0.4848 | 0.0615 | 0.3781 | 0.622 |
| 18 | 32 | 2 | 0.4545 | 0.0613 | 0.34898 | 0.592 |
| 19 | 30 | 2 | 0.4242 | 0.0608 | 0.3203 | 0.562 |
| 20 | 28 | 2 | 0.3939 | 0.0601 | 0.29206 | 0.531 |
| 21 | 26 | 1 | 0.3788 | 0.0597 | 0.27811 | 0.516 |
| 22 | 25 | 1 | 0.3636 | 0.0592 | 0.26428 | 0.5 |
| 23 | 24 | 1 | 0.3485 | 0.0587 | 0.25057 | 0.485 |
| 24 | 23 | 1 | 0.3333 | 0.058 | 0.23698 | 0.469 |
| 37 | 22 | 1 | 0.3182 | 0.0573 | 0.22351 | 0.453 |
| 38 | 21 | 1 | 0.303 | 0.0566 | 0.21018 | 0.437 |
| 39 | 20 | 1 | 0.2879 | 0.0557 | 0.19698 | 0.421 |
| 40 | 19 | 1 | 0.2727 | 0.0548 | 0.18392 | 0.404 |
| 41 | 18 | 1 | 0.2576 | 0.0538 | 0.17101 | 0.388 |
| 42 | 17 | 1 | 0.2424 | 0.0528 | 0.15825 | 0.371 |
| 86 | 16 | 1 | 0.2273 | 0.0516 | 0.14566 | 0.355 |
| 87 | 15 | 1 | 0.2121 | 0.0503 | 0.13325 | 0.338 |
| 88 | 14 | 1 | 0.197 | 0.049 | 0.12102 | 0.321 |
| 89 | 13 | 1 | 0.1818 | 0.0475 | 0.10899 | 0.303 |
| 90 | 12 | 1 | 0.1667 | 0.0459 | 0.09718 | 0.286 |
| 91 | 11 | 1 | 0.1515 | 0.0441 | 0.08561 | 0.268 |
| 92 | 10 | 1 | 0.1364 | 0.0422 | 0.07431 | 0.25 |
| 93 | 9 | 1 | 0.1212 | 0.0402 | 0.0633 | 0.232 |
| 94 | 8 | 1 | 0.1061 | 0.0379 | 0.05265 | 0.214 |
| 95 | 7 | 1 | 0.0909 | 0.0354 | 0.04239 | 0.195 |
| 96 | 6 | 1 | 0.0758 | 0.0326 | 0.03262 | 0.176 |
| 152 | 5 | 1 | 0.0606 | 0.0294 | 0.02344 | 0.157 |
| 153 | 4 | 1 | 0.0455 | 0.0256 | 0.01505 | 0.137 |
| 154 | 3 | 1 | 0.0303 | 0.0211 | 0.00774 | 0.119 |
| 155 | 2 | 1 | 0.0152 | 0.015 | 0.00217 | 0.106 |
| 156 | 1 | 1 | 0 | NaN | NA | NA |

**Table S113.** Kinik station Kaplan-Meier drought risk estimates according to SPEI-3, 6, and 12

| Drought Risk (SPEI3) | | Drought Risk (SPEI6) | | Drought Risk (SPEI12) | |
| --- | --- | --- | --- | --- | --- |
| Time | Drought Risk | Time | Drought Risk | Time | Drought Risk |
| 1 | 0.04 | 1 | 0.0563 | 1 | 0.0152 |
| 2 | 0.1333 | 2 | 0.0986 | 2 | 0.0455 |
| 3 | 0.28 | 3 | 0.1408 | 3 | 0.0758 |
| 4 | 0.4267 | 4 | 0.1972 | 4 | 0.0909 |
| 5 | 0.5333 | 6 | 0.2113 | 5 | 0.1212 |
| 6 | 0.56 | 7 | 0.2254 | 6 | 0.1364 |
| 7 | 0.5867 | 8 | 0.2394 | 7 | 0.1667 |
| 8 | 0.6267 | 9 | 0.2817 | 8 | 0.197 |
| 9 | 0.6667 | 10 | 0.338 | 9 | 0.2273 |
| 10 | 0.7333 | 11 | 0.3803 | 10 | 0.2727 |
| 11 | 0.8 | 12 | 0.4225 | 11 | 0.3182 |
| 12 | 0.84 | 13 | 0.4648 | 12 | 0.3636 |
| 14 | 0.8533 | 14 | 0.507 | 13 | 0.3939 |
| 15 | 0.8667 | 15 | 0.5493 | 14 | 0.4242 |
| 16 | 0.88 | 16 | 0.5775 | 15 | 0.4545 |
| 18 | 0.9067 | 17 | 0.6197 | 16 | 0.4848 |
| 19 | 0.92 | 18 | 0.662 | 17 | 0.5152 |
| 24 | 0.9333 | 19 | 0.7042 | 18 | 0.5455 |
| 27 | 0.9467 | 20 | 0.7465 | 19 | 0.5758 |
| 29 | 0.96 | 21 | 0.7746 | 20 | 0.6061 |
| 37 | 0.9733 | 22 | 0.7887 | 21 | 0.6212 |
| 38 | 0.9867 | 23 | 0.8028 | 22 | 0.6364 |
| 39 | 1 | 24 | 0.8169 | 23 | 0.6515 |
|  |  | 27 | 0.831 | 24 | 0.6667 |
|  |  | 28 | 0.8592 | 37 | 0.6818 |
|  |  | 36 | 0.8732 | 38 | 0.697 |
|  |  | 37 | 0.8873 | 39 | 0.7121 |
|  |  | 38 | 0.9014 | 40 | 0.7273 |
|  |  | 39 | 0.9155 | 41 | 0.7424 |
|  |  | 40 | 0.9296 | 42 | 0.7576 |
|  |  | 41 | 0.9437 | 86 | 0.7727 |
|  |  | 42 | 0.9577 | 87 | 0.7879 |
|  |  | 43 | 0.9718 | 88 | 0.803 |
|  |  | 112 | 0.9859 | 89 | 0.8182 |
|  |  | 113 | 1 | 90 | 0.8333 |
|  |  |  |  | 91 | 0.8485 |
|  |  |  |  | 92 | 0.8636 |
|  |  |  |  | 93 | 0.8788 |
|  |  |  |  | 94 | 0.8939 |
|  |  |  |  | 95 | 0.9091 |
|  |  |  |  | 96 | 0.9242 |
|  |  |  |  | 152 | 0.9394 |
|  |  |  |  | 153 | 0.9545 |
|  |  |  |  | 154 | 0.9697 |
|  |  |  |  | 155 | 0.9848 |
|  |  |  |  | 156 | 1 |

**Table S114.** Kiraz station Kaplan-Meier survival estimates according to SPI-3

| Kaplan-Meier Wet to Dry (SPI3) | | | | | | |
| --- | --- | --- | --- | --- | --- | --- |
|  |  | n | events | median | 0.95LCL | 0.95UCL |
|  |  | 57 | 57 | 7 | 5 | 10 |
| time | n.risk | n.event | survival | std.err | lower 95% CL | upper 95% CL |
| 1 | 57 | 4 | 0.9298 | 0.0338 | 0.86582 | 0.999 |
| 2 | 53 | 2 | 0.8947 | 0.0406 | 0.81851 | 0.978 |
| 3 | 51 | 4 | 0.8246 | 0.0504 | 0.73151 | 0.929 |
| 4 | 47 | 7 | 0.7018 | 0.0606 | 0.5925 | 0.831 |
| 5 | 40 | 6 | 0.5965 | 0.065 | 0.48181 | 0.738 |
| 6 | 34 | 4 | 0.5263 | 0.0661 | 0.41142 | 0.673 |
| 7 | 30 | 3 | 0.4737 | 0.0661 | 0.36028 | 0.623 |
| 8 | 27 | 2 | 0.4386 | 0.0657 | 0.32697 | 0.588 |
| 9 | 25 | 3 | 0.386 | 0.0645 | 0.27819 | 0.535 |
| 10 | 22 | 3 | 0.3333 | 0.0624 | 0.23091 | 0.481 |
| 11 | 19 | 3 | 0.2807 | 0.0595 | 0.18525 | 0.425 |
| 12 | 16 | 2 | 0.2456 | 0.057 | 0.15583 | 0.387 |
| 13 | 14 | 1 | 0.2281 | 0.0556 | 0.14146 | 0.368 |
| 16 | 13 | 2 | 0.193 | 0.0523 | 0.11349 | 0.328 |
| 17 | 11 | 2 | 0.1579 | 0.0483 | 0.0867 | 0.288 |
| 18 | 9 | 3 | 0.1053 | 0.0406 | 0.04938 | 0.224 |
| 19 | 6 | 1 | 0.0877 | 0.0375 | 0.03798 | 0.203 |
| 28 | 5 | 1 | 0.0702 | 0.0338 | 0.02728 | 0.181 |
| 29 | 4 | 1 | 0.0526 | 0.0296 | 0.01749 | 0.158 |
| 37 | 3 | 1 | 0.0351 | 0.0244 | 0.00899 | 0.137 |
| 48 | 2 | 1 | 0.0175 | 0.0174 | 0.00251 | 0.122 |
| 49 | 1 | 1 | 0 | NaN | NA | NA |

**Table S115.** Kiraz station Kaplan-Meier survival estimates according to SPI-6

| Kaplan-Meier Wet to Dry (SPI6) | | | | | | |
| --- | --- | --- | --- | --- | --- | --- |
|  |  | n | events | median | 0.95LCL | 0.95UCL |
|  |  | 49 | 49 | 12 | 8 | 26 |
| time | n.risk | n.event | survival | std.err | lower 95% CL | upper 95% CL |
| 1 | 49 | 1 | 0.9796 | 0.0202 | 0.94079 | 1 |
| 2 | 48 | 3 | 0.9184 | 0.0391 | 0.84482 | 0.998 |
| 3 | 45 | 3 | 0.8571 | 0.05 | 0.76456 | 0.961 |
| 4 | 42 | 2 | 0.8163 | 0.0553 | 0.7148 | 0.932 |
| 5 | 40 | 2 | 0.7755 | 0.0596 | 0.66706 | 0.902 |
| 6 | 38 | 2 | 0.7347 | 0.0631 | 0.62092 | 0.869 |
| 7 | 36 | 3 | 0.6735 | 0.067 | 0.55417 | 0.818 |
| 8 | 33 | 3 | 0.6122 | 0.0696 | 0.48995 | 0.765 |
| 9 | 30 | 3 | 0.551 | 0.0711 | 0.42796 | 0.709 |
| 11 | 27 | 2 | 0.5102 | 0.0714 | 0.38779 | 0.671 |
| 12 | 25 | 1 | 0.4898 | 0.0714 | 0.36805 | 0.652 |
| 13 | 24 | 1 | 0.4694 | 0.0713 | 0.34853 | 0.632 |
| 14 | 23 | 1 | 0.449 | 0.0711 | 0.32924 | 0.612 |
| 15 | 22 | 1 | 0.4286 | 0.0707 | 0.31018 | 0.592 |
| 16 | 21 | 2 | 0.3878 | 0.0696 | 0.27275 | 0.551 |
| 17 | 19 | 1 | 0.3673 | 0.0689 | 0.25439 | 0.53 |
| 23 | 18 | 1 | 0.3469 | 0.068 | 0.23628 | 0.509 |
| 26 | 17 | 1 | 0.3265 | 0.067 | 0.21842 | 0.488 |
| 27 | 16 | 2 | 0.2857 | 0.0645 | 0.18351 | 0.445 |
| 28 | 14 | 1 | 0.2653 | 0.0631 | 0.16649 | 0.423 |
| 29 | 13 | 1 | 0.2449 | 0.0614 | 0.14978 | 0.4 |
| 30 | 12 | 1 | 0.2245 | 0.0596 | 0.13341 | 0.378 |
| 31 | 11 | 1 | 0.2041 | 0.0576 | 0.1174 | 0.355 |
| 32 | 10 | 1 | 0.1837 | 0.0553 | 0.10179 | 0.331 |
| 33 | 9 | 1 | 0.1633 | 0.0528 | 0.08662 | 0.308 |
| 34 | 8 | 1 | 0.1429 | 0.05 | 0.07195 | 0.284 |
| 37 | 7 | 1 | 0.1224 | 0.0468 | 0.05787 | 0.259 |
| 44 | 6 | 1 | 0.102 | 0.0432 | 0.04447 | 0.234 |
| 45 | 5 | 1 | 0.0816 | 0.0391 | 0.03192 | 0.209 |
| 46 | 4 | 1 | 0.0612 | 0.0342 | 0.02045 | 0.183 |
| 47 | 3 | 1 | 0.0408 | 0.0283 | 0.0105 | 0.159 |
| 64 | 2 | 1 | 0.0204 | 0.0202 | 0.00293 | 0.142 |
| 65 | 1 | 1 | 0 | NaN | NA | NA |

**Table S116.** Kiraz station Kaplan-Meier survival estimates according to SPI-12

| Kaplan-Meier Wet to Dry (SPI12) | | | | | | |
| --- | --- | --- | --- | --- | --- | --- |
|  |  | n | events | median | 0.95LCL | 0.95UCL |
|  |  | 50 | 50 | 32.5 | 29 | 37 |
| time | n.risk | n.event | survival | std.err | lower 95% CL | upper 95% CL |
| 9 | 50 | 1 | 0.98 | 0.0198 | 0.94195 | 1 |
| 11 | 49 | 1 | 0.96 | 0.0277 | 0.90719 | 1 |
| 12 | 48 | 1 | 0.94 | 0.0336 | 0.87643 | 1 |
| 13 | 47 | 1 | 0.92 | 0.0384 | 0.84779 | 0.998 |
| 14 | 46 | 1 | 0.9 | 0.0424 | 0.82057 | 0.987 |
| 15 | 45 | 1 | 0.88 | 0.046 | 0.79438 | 0.975 |
| 16 | 44 | 1 | 0.86 | 0.0491 | 0.769 | 0.962 |
| 17 | 43 | 1 | 0.84 | 0.0518 | 0.74429 | 0.948 |
| 18 | 42 | 1 | 0.82 | 0.0543 | 0.72014 | 0.934 |
| 19 | 41 | 1 | 0.8 | 0.0566 | 0.69647 | 0.919 |
| 25 | 40 | 1 | 0.78 | 0.0586 | 0.67323 | 0.904 |
| 26 | 39 | 2 | 0.74 | 0.062 | 0.62788 | 0.872 |
| 27 | 37 | 2 | 0.7 | 0.0648 | 0.58384 | 0.839 |
| 28 | 35 | 2 | 0.66 | 0.067 | 0.54093 | 0.805 |
| 29 | 33 | 2 | 0.62 | 0.0686 | 0.49906 | 0.77 |
| 30 | 31 | 2 | 0.58 | 0.0698 | 0.45813 | 0.734 |
| 31 | 29 | 2 | 0.54 | 0.0705 | 0.41811 | 0.697 |
| 32 | 27 | 2 | 0.5 | 0.0707 | 0.37896 | 0.66 |
| 33 | 25 | 2 | 0.46 | 0.0705 | 0.34067 | 0.621 |
| 34 | 23 | 2 | 0.42 | 0.0698 | 0.30324 | 0.582 |
| 35 | 21 | 2 | 0.38 | 0.0686 | 0.2667 | 0.541 |
| 36 | 19 | 2 | 0.34 | 0.067 | 0.23108 | 0.5 |
| 37 | 17 | 2 | 0.3 | 0.0648 | 0.19644 | 0.458 |
| 38 | 15 | 1 | 0.28 | 0.0635 | 0.17952 | 0.437 |
| 39 | 14 | 1 | 0.26 | 0.062 | 0.16289 | 0.415 |
| 40 | 13 | 1 | 0.24 | 0.0604 | 0.14655 | 0.393 |
| 41 | 12 | 1 | 0.22 | 0.0586 | 0.13054 | 0.371 |
| 42 | 11 | 1 | 0.2 | 0.0566 | 0.11489 | 0.348 |
| 43 | 10 | 1 | 0.18 | 0.0543 | 0.09962 | 0.325 |
| 44 | 9 | 1 | 0.16 | 0.0518 | 0.08478 | 0.302 |
| 45 | 8 | 1 | 0.14 | 0.0491 | 0.07043 | 0.278 |
| 46 | 7 | 1 | 0.12 | 0.046 | 0.05665 | 0.254 |
| 47 | 6 | 1 | 0.1 | 0.0424 | 0.04354 | 0.23 |
| 48 | 5 | 1 | 0.08 | 0.0384 | 0.03125 | 0.205 |
| 49 | 4 | 1 | 0.06 | 0.0336 | 0.02003 | 0.18 |
| 96 | 3 | 1 | 0.04 | 0.0277 | 0.01029 | 0.156 |
| 120 | 2 | 1 | 0.02 | 0.0198 | 0.00287 | 0.139 |
| 121 | 1 | 1 | 0 | NaN | NA | NA |

**Table S117.** Kiraz station Kaplan-Meier drought risk estimates according to SPI-3, 6, and 12

| Drought Risk (SPI3) | | Drought Risk (SPI6) | | Drought Risk (SPI12) | |
| --- | --- | --- | --- | --- | --- |
| Time | Drought Risk | Time | Drought Risk | Time | Drought Risk |
| 1 | 0.0702 | 1 | 0.0204 | 3 | 0.006667 |
| 2 | 0.1053 | 2 | 0.0816 | 6 | 0.013333 |
| 3 | 0.1754 | 3 | 0.1429 | 9 | 0.02 |
| 4 | 0.2982 | 4 | 0.1837 | 11 | 0.04 |
| 5 | 0.4035 | 5 | 0.2245 | 12 | 0.06 |
| 6 | 0.4737 | 6 | 0.2653 | 13 | 0.08 |
| 7 | 0.5263 | 7 | 0.3265 | 14 | 0.1 |
| 8 | 0.5614 | 8 | 0.3878 | 15 | 0.12 |
| 9 | 0.614 | 9 | 0.449 | 16 | 0.14 |
| 10 | 0.6667 | 11 | 0.4898 | 17 | 0.16 |
| 11 | 0.7193 | 12 | 0.5102 | 18 | 0.18 |
| 12 | 0.7544 | 13 | 0.5306 | 19 | 0.2 |
| 13 | 0.7719 | 14 | 0.551 | 25 | 0.22 |
| 16 | 0.807 | 15 | 0.5714 | 26 | 0.26 |
| 17 | 0.8421 | 16 | 0.6122 | 27 | 0.3 |
| 18 | 0.8947 | 17 | 0.6327 | 28 | 0.34 |
| 19 | 0.9123 | 23 | 0.6531 | 29 | 0.38 |
| 28 | 0.9298 | 26 | 0.6735 | 30 | 0.42 |
| 29 | 0.9474 | 27 | 0.7143 | 31 | 0.46 |
| 37 | 0.9649 | 28 | 0.7347 | 32 | 0.5 |
| 48 | 0.9825 | 29 | 0.7551 | 33 | 0.54 |
| 49 | 1 | 30 | 0.7755 | 34 | 0.58 |
|  |  | 31 | 0.7959 | 35 | 0.62 |
|  |  | 32 | 0.8163 | 36 | 0.66 |
|  |  | 33 | 0.8367 | 37 | 0.7 |
|  |  | 34 | 0.8571 | 38 | 0.72 |
|  |  | 37 | 0.8776 | 39 | 0.74 |
|  |  | 44 | 0.898 | 40 | 0.76 |
|  |  | 45 | 0.9184 | 41 | 0.78 |
|  |  | 46 | 0.9388 | 42 | 0.8 |
|  |  | 47 | 0.9592 | 43 | 0.82 |
|  |  | 64 | 0.9796 | 44 | 0.84 |
|  |  | 65 | 1 | 45 | 0.86 |
|  |  |  |  | 46 | 0.88 |
|  |  |  |  | 47 | 0.9 |
|  |  |  |  | 48 | 0.92 |
|  |  |  |  | 49 | 0.94 |
|  |  |  |  | 96 | 0.96 |
|  |  |  |  | 120 | 0.98 |
|  |  |  |  | 121 | 1 |

**Table S118.** Kiraz station Kaplan-Meier survival estimates according to SPEI-3

| Kaplan-Meier Wet to Dry (SPEI3) | | | | | | | |
| --- | --- | --- | --- | --- | --- | --- | --- |
|  |  | n | events | median | 0.95LCL | 0.95UCL |
|  |  | 66 | 66 | 17 | 13 | 23 |
| time | n.risk | n.event | survival | std.err | lower 95% CI | upper 95% CI |
| 1 | 66 | 1 | 0.9848 | 0.015 | 0.95581 | 1.000 |
| 2 | 65 | 2 | 0.9545 | 0.0256 | 0.90559 | 1.000 |
| 3 | 63 | 2 | 0.9242 | 0.0326 | 0.86256 | 0.99 |
| 4 | 61 | 1 | 0.9091 | 0.0354 | 0.84231 | 0.981 |
| 5 | 60 | 2 | 0.8788 | 0.0402 | 0.80347 | 0.961 |
| 6 | 58 | 1 | 0.8636 | 0.0422 | 0.78469 | 0.951 |
| 7 | 57 | 2 | 0.8333 | 0.0459 | 0.7481 | 0.928 |
| 8 | 55 | 2 | 0.803 | 0.049 | 0.71259 | 0.905 |
| 9 | 53 | 2 | 0.7727 | 0.0516 | 0.67796 | 0.881 |
| 10 | 51 | 3 | 0.7273 | 0.0548 | 0.62739 | 0.843 |
| 11 | 48 | 3 | 0.6818 | 0.0573 | 0.57822 | 0.804 |
| 12 | 45 | 3 | 0.6364 | 0.0592 | 0.53028 | 0.764 |
| 13 | 42 | 2 | 0.6061 | 0.0601 | 0.49893 | 0.736 |
| 14 | 40 | 2 | 0.5758 | 0.0608 | 0.46806 | 0.708 |
| 15 | 38 | 2 | 0.5455 | 0.0613 | 0.43763 | 0.68 |
| 16 | 36 | 2 | 0.5152 | 0.0615 | 0.40765 | 0.651 |
| 17 | 34 | 2 | 0.4848 | 0.0615 | 0.3781 | 0.622 |
| 18 | 32 | 2 | 0.4545 | 0.0613 | 0.34898 | 0.592 |
| 19 | 30 | 2 | 0.4242 | 0.0608 | 0.3203 | 0.562 |
| 20 | 28 | 2 | 0.3939 | 0.0601 | 0.29206 | 0.531 |
| 21 | 26 | 1 | 0.3788 | 0.0597 | 0.27811 | 0.516 |
| 22 | 25 | 1 | 0.3636 | 0.0592 | 0.26428 | 0.5 |
| 23 | 24 | 1 | 0.3485 | 0.0587 | 0.25057 | 0.485 |
| 24 | 23 | 1 | 0.3333 | 0.058 | 0.23698 | 0.469 |
| 37 | 22 | 1 | 0.3182 | 0.0573 | 0.22351 | 0.453 |
| 38 | 21 | 1 | 0.303 | 0.0566 | 0.21018 | 0.437 |
| 39 | 20 | 1 | 0.2879 | 0.0557 | 0.19698 | 0.421 |
| 40 | 19 | 1 | 0.2727 | 0.0548 | 0.18392 | 0.404 |
| 41 | 18 | 1 | 0.2576 | 0.0538 | 0.17101 | 0.388 |
| 42 | 17 | 1 | 0.2424 | 0.0528 | 0.15825 | 0.371 |
| 86 | 16 | 1 | 0.2273 | 0.0516 | 0.14566 | 0.355 |
| 87 | 15 | 1 | 0.2121 | 0.0503 | 0.13325 | 0.338 |
| 88 | 14 | 1 | 0.197 | 0.049 | 0.12102 | 0.321 |
| 89 | 13 | 1 | 0.1818 | 0.0475 | 0.10899 | 0.303 |
| 90 | 12 | 1 | 0.1667 | 0.0459 | 0.09718 | 0.286 |
| 91 | 11 | 1 | 0.1515 | 0.0441 | 0.08561 | 0.268 |
| 92 | 10 | 1 | 0.1364 | 0.0422 | 0.07431 | 0.25 |
| 93 | 9 | 1 | 0.1212 | 0.0402 | 0.0633 | 0.232 |
| 94 | 8 | 1 | 0.1061 | 0.0379 | 0.05265 | 0.214 |
| 95 | 7 | 1 | 0.0909 | 0.0354 | 0.04239 | 0.195 |
| 96 | 6 | 1 | 0.0758 | 0.0326 | 0.03262 | 0.176 |
| 152 | 5 | 1 | 0.0606 | 0.0294 | 0.02344 | 0.157 |
| 153 | 4 | 1 | 0.0455 | 0.0256 | 0.01505 | 0.137 |
| 154 | 3 | 1 | 0.0303 | 0.0211 | 0.00774 | 0.119 |
| 155 | 2 | 1 | 0.0152 | 0.015 | 0.00217 | 0.106 |
| 156 | 1 | 1 | 0 | NaN | NA | NA |

**Table S119.** Kiraz station Kaplan-Meier survival estimates according to SPEI-6

| Kaplan-Meier Wet to Dry (SPEI6) | | | | | | | |
| --- | --- | --- | --- | --- | --- | --- | --- |
|  |  | n | events | median | 0.95LCL | 0.95UCL |
|  |  | 70 | 70 | 9 | 8 | 11 |
| time | n.risk | n.event | survival | std.err | lower 95% CI | upper 95% CI |
| 2 | 70 | 1 | 0.9857 | 0.0142 | 0.9583 | 1.000 |
| 3 | 69 | 1 | 0.9714 | 0.0199 | 0.93317 | 1.000 |
| 4 | 68 | 1 | 0.9571 | 0.0242 | 0.91085 | 1.000 |
| 5 | 67 | 2 | 0.9286 | 0.0308 | 0.87016 | 0.991 |
| 6 | 65 | 6 | 0.8429 | 0.0435 | 0.76177 | 0.933 |
| 7 | 59 | 8 | 0.7286 | 0.0532 | 0.6315 | 0.841 |
| 8 | 51 | 9 | 0.6 | 0.0586 | 0.49554 | 0.726 |
| 9 | 42 | 8 | 0.4857 | 0.0597 | 0.38167 | 0.618 |
| 10 | 34 | 6 | 0.4 | 0.0586 | 0.30023 | 0.533 |
| 11 | 28 | 4 | 0.3429 | 0.0567 | 0.24789 | 0.474 |
| 12 | 24 | 3 | 0.3 | 0.0548 | 0.20976 | 0.429 |
| 13 | 21 | 2 | 0.2714 | 0.0532 | 0.18492 | 0.398 |
| 14 | 19 | 1 | 0.2571 | 0.0522 | 0.17268 | 0.383 |
| 15 | 18 | 1 | 0.2429 | 0.0513 | 0.16059 | 0.367 |
| 16 | 17 | 1 | 0.2286 | 0.0502 | 0.14863 | 0.352 |
| 20 | 16 | 1 | 0.2143 | 0.049 | 0.13683 | 0.336 |
| 21 | 15 | 2 | 0.1857 | 0.0465 | 0.11371 | 0.303 |
| 22 | 13 | 1 | 0.1714 | 0.045 | 0.10243 | 0.287 |
| 23 | 12 | 1 | 0.1571 | 0.0435 | 0.09134 | 0.27 |
| 24 | 11 | 1 | 0.1429 | 0.0418 | 0.08048 | 0.254 |
| 25 | 10 | 1 | 0.1286 | 0.04 | 0.06987 | 0.237 |
| 26 | 9 | 1 | 0.1143 | 0.038 | 0.05953 | 0.219 |
| 27 | 8 | 2 | 0.0857 | 0.0335 | 0.03988 | 0.184 |
| 28 | 6 | 1 | 0.0714 | 0.0308 | 0.03069 | 0.166 |
| 29 | 5 | 1 | 0.0571 | 0.0277 | 0.02206 | 0.148 |
| 30 | 4 | 1 | 0.0429 | 0.0242 | 0.01417 | 0.13 |
| 48 | 3 | 1 | 0.0286 | 0.0199 | 0.00729 | 0.112 |
| 64 | 2 | 1 | 0.0143 | 0.0142 | 0.00204 | 0.1 |
| 65 | 1 | 1 | 0 | NaN | NA | NA |

**Table S120.** Kiraz station Kaplan-Meier survival estimates according to SPEI-12

| Kaplan-Meier Wet to Dry (SPEI12) | | | | | | | |
| --- | --- | --- | --- | --- | --- | --- | --- |
|  |  | n | events | median | 0.95LCL | 0.95UCL |
|  |  | 60 | 60 | 8 | 6 | 13 |
| time | n.risk | n.event | survival | std.err | lower 95% CI | upper 95% CI |
| 1 | 60 | 7 | 0.8833 | 0.0414 | 0.80573 | 0.968 |
| 2 | 53 | 4 | 0.8167 | 0.05 | 0.7244 | 0.921 |
| 3 | 49 | 3 | 0.7667 | 0.0546 | 0.66678 | 0.882 |
| 4 | 46 | 3 | 0.7167 | 0.0582 | 0.61125 | 0.84 |
| 5 | 43 | 3 | 0.6667 | 0.0609 | 0.55745 | 0.797 |
| 6 | 40 | 4 | 0.6 | 0.0632 | 0.48801 | 0.738 |
| 7 | 36 | 4 | 0.5333 | 0.0644 | 0.42093 | 0.676 |
| 8 | 32 | 3 | 0.4833 | 0.0645 | 0.37208 | 0.628 |
| 9 | 29 | 2 | 0.45 | 0.0642 | 0.34019 | 0.595 |
| 10 | 27 | 2 | 0.4167 | 0.0636 | 0.30886 | 0.562 |
| 11 | 25 | 1 | 0.4 | 0.0632 | 0.29341 | 0.545 |
| 12 | 24 | 2 | 0.3667 | 0.0622 | 0.26293 | 0.511 |
| 13 | 22 | 2 | 0.3333 | 0.0609 | 0.23306 | 0.477 |
| 14 | 20 | 2 | 0.3 | 0.0592 | 0.20383 | 0.442 |
| 15 | 18 | 2 | 0.2667 | 0.0571 | 0.17528 | 0.406 |
| 16 | 16 | 1 | 0.25 | 0.0559 | 0.16129 | 0.388 |
| 17 | 15 | 1 | 0.2333 | 0.0546 | 0.1475 | 0.369 |
| 18 | 14 | 1 | 0.2167 | 0.0532 | 0.13392 | 0.351 |
| 19 | 13 | 1 | 0.2 | 0.0516 | 0.12057 | 0.332 |
| 20 | 12 | 1 | 0.1833 | 0.05 | 0.10748 | 0.313 |
| 21 | 11 | 1 | 0.1667 | 0.0481 | 0.09465 | 0.293 |
| 22 | 10 | 1 | 0.15 | 0.0461 | 0.08213 | 0.274 |
| 23 | 9 | 1 | 0.1333 | 0.0439 | 0.06995 | 0.254 |
| 24 | 8 | 1 | 0.1167 | 0.0414 | 0.05815 | 0.234 |
| 25 | 7 | 1 | 0.1 | 0.0387 | 0.04681 | 0.214 |
| 27 | 6 | 1 | 0.0833 | 0.0357 | 0.036 | 0.193 |
| 28 | 5 | 1 | 0.0667 | 0.0322 | 0.02587 | 0.172 |
| 29 | 4 | 1 | 0.05 | 0.0281 | 0.01659 | 0.151 |
| 106 | 3 | 1 | 0.0333 | 0.0232 | 0.00853 | 0.13 |
| 120 | 2 | 1 | 0.0167 | 0.0165 | 0.00239 | 0.116 |
| 121 | 1 | 1 | 0 | NaN | NA | NA |

**Table S121.** Kiraz station Kaplan-Meier drought risk estimates according to SPEI-3, 6, and 12

| Drought Risk (SPEI3) | | Drought Risk (SPEI6) | | Drought Risk (SPEI12) | |
| --- | --- | --- | --- | --- | --- |
| Time | Drought Risk | Time | Drought Risk | Time | Drought Risk |
| 1 | 0.0152 | 2 | 0.0143 | 1 | 0.1167 |
| 2 | 0.0455 | 3 | 0.0286 | 2 | 0.1833 |
| 3 | 0.0758 | 4 | 0.0429 | 3 | 0.2333 |
| 4 | 0.0909 | 5 | 0.0714 | 4 | 0.2833 |
| 5 | 0.1212 | 6 | 0.1571 | 5 | 0.3333 |
| 6 | 0.1364 | 7 | 0.2714 | 6 | 0.4 |
| 7 | 0.1667 | 8 | 0.4 | 7 | 0.4667 |
| 8 | 0.197 | 9 | 0.5143 | 8 | 0.5167 |
| 9 | 0.2273 | 10 | 0.6 | 9 | 0.55 |
| 10 | 0.2727 | 11 | 0.6571 | 10 | 0.5833 |
| 11 | 0.3182 | 12 | 0.7 | 11 | 0.6 |
| 12 | 0.3636 | 13 | 0.7286 | 12 | 0.6333 |
| 13 | 0.3939 | 14 | 0.7429 | 13 | 0.6667 |
| 14 | 0.4242 | 15 | 0.7571 | 14 | 0.7 |
| 15 | 0.4545 | 16 | 0.7714 | 15 | 0.7333 |
| 16 | 0.4848 | 20 | 0.7857 | 16 | 0.75 |
| 17 | 0.5152 | 21 | 0.8143 | 17 | 0.7667 |
| 18 | 0.5455 | 22 | 0.8286 | 18 | 0.7833 |
| 19 | 0.5758 | 23 | 0.8429 | 19 | 0.8 |
| 20 | 0.6061 | 24 | 0.8571 | 20 | 0.8167 |
| 21 | 0.6212 | 25 | 0.8714 | 21 | 0.8333 |
| 22 | 0.6364 | 26 | 0.8857 | 22 | 0.85 |
| 23 | 0.6515 | 27 | 0.9143 | 23 | 0.8667 |
| 24 | 0.6667 | 28 | 0.9286 | 24 | 0.8833 |
| 37 | 0.6818 | 29 | 0.9429 | 25 | 0.9 |
| 38 | 0.697 | 30 | 0.9571 | 27 | 0.9167 |
| 39 | 0.7121 | 48 | 0.9714 | 28 | 0.9333 |
| 40 | 0.7273 | 64 | 0.9857 | 29 | 0.95 |
| 41 | 0.7424 | 65 | 1 | 106 | 0.9667 |
| 42 | 0.7576 |  |  | 120 | 0.9833 |
| 86 | 0.7727 |  |  | 121 | 1 |
| 87 | 0.7879 |  |  |  |  |
| 88 | 0.803 |  |  |  |  |
| 89 | 0.8182 |  |  |  |  |
| 90 | 0.8333 |  |  |  |  |
| 91 | 0.8485 |  |  |  |  |
| 92 | 0.8636 |  |  |  |  |
| 93 | 0.8788 |  |  |  |  |
| 94 | 0.8939 |  |  |  |  |
| 95 | 0.9091 |  |  |  |  |
| 96 | 0.9242 |  |  |  |  |
| 152 | 0.9394 |  |  |  |  |
| 153 | 0.9545 |  |  |  |  |
| 154 | 0.9697 |  |  |  |  |
| 155 | 0.9848 |  |  |  |  |
| 156 | 1 |  |  |  |  |

**Table S122.** Kirkagac station Kaplan-Meier survival estimates according to SPI-3

| Kaplan-Meier Wet to Dry (SPI3) | | | | | | |
| --- | --- | --- | --- | --- | --- | --- |
|  |  | n | events | median | 0.95LCL | 0.95UCL |
|  |  | 39 | 39 | 7 | 5 | 12 |
| time | n.risk | n.event | survival | std.err | lower 95% CL | upper 95% CL |
| 1 | 39 | 5 | 0.8718 | 0.0535 | 0.7729 | 0.983 |
| 2 | 34 | 2 | 0.8205 | 0.0615 | 0.7085 | 0.95 |
| 3 | 32 | 4 | 0.7179 | 0.0721 | 0.5897 | 0.874 |
| 4 | 28 | 3 | 0.641 | 0.0768 | 0.5068 | 0.811 |
| 5 | 25 | 2 | 0.5897 | 0.0788 | 0.4539 | 0.766 |
| 6 | 23 | 3 | 0.5128 | 0.08 | 0.3777 | 0.696 |
| 7 | 20 | 1 | 0.4872 | 0.08 | 0.3531 | 0.672 |
| 8 | 19 | 2 | 0.4359 | 0.0794 | 0.305 | 0.623 |
| 9 | 17 | 3 | 0.359 | 0.0768 | 0.236 | 0.546 |
| 11 | 14 | 1 | 0.3333 | 0.0755 | 0.2139 | 0.52 |
| 12 | 13 | 1 | 0.3077 | 0.0739 | 0.1922 | 0.493 |
| 13 | 12 | 2 | 0.2564 | 0.0699 | 0.1503 | 0.438 |
| 14 | 10 | 1 | 0.2308 | 0.0675 | 0.1301 | 0.409 |
| 15 | 9 | 1 | 0.2051 | 0.0647 | 0.1106 | 0.38 |
| 16 | 8 | 3 | 0.1282 | 0.0535 | 0.0566 | 0.291 |
| 17 | 5 | 1 | 0.1026 | 0.0486 | 0.0405 | 0.26 |
| 18 | 4 | 1 | 0.0769 | 0.0427 | 0.0259 | 0.228 |
| 24 | 3 | 1 | 0.0513 | 0.0353 | 0.0133 | 0.198 |
| 25 | 2 | 2 | 0 | NaN | NA | NA |

**Table S123.** Kirkagac station Kaplan-Meier survival estimates according to SPI-6

| Kaplan-Meier Wet to Dry (SPI6) | | | | | | |
| --- | --- | --- | --- | --- | --- | --- |
|  |  | n | events | median | 0.95LCL | 0.95UCL |
|  |  | 41 | 41 | 12 | 6 | 17 |
| time | n.risk | n.event | survival | std.err | lower 95% CL | upper 95% CL |
| 1 | 41 | 6 | 0.8537 | 0.0552 | 0.75204 | 0.969 |
| 2 | 35 | 4 | 0.7561 | 0.0671 | 0.63544 | 0.9 |
| 3 | 31 | 2 | 0.7073 | 0.0711 | 0.5809 | 0.861 |
| 4 | 29 | 1 | 0.6829 | 0.0727 | 0.55436 | 0.841 |
| 5 | 28 | 2 | 0.6341 | 0.0752 | 0.50259 | 0.8 |
| 6 | 26 | 1 | 0.6098 | 0.0762 | 0.47732 | 0.779 |
| 7 | 25 | 1 | 0.5854 | 0.0769 | 0.45242 | 0.757 |
| 10 | 24 | 1 | 0.561 | 0.0775 | 0.4279 | 0.735 |
| 11 | 23 | 2 | 0.5122 | 0.0781 | 0.37993 | 0.691 |
| 12 | 21 | 1 | 0.4878 | 0.0781 | 0.35647 | 0.668 |
| 13 | 20 | 1 | 0.4634 | 0.0779 | 0.33337 | 0.644 |
| 15 | 19 | 3 | 0.3902 | 0.0762 | 0.26617 | 0.572 |
| 16 | 16 | 2 | 0.3415 | 0.0741 | 0.22322 | 0.522 |
| 17 | 14 | 1 | 0.3171 | 0.0727 | 0.20233 | 0.497 |
| 18 | 13 | 1 | 0.2927 | 0.0711 | 0.18186 | 0.471 |
| 19 | 12 | 1 | 0.2683 | 0.0692 | 0.16184 | 0.445 |
| 20 | 11 | 1 | 0.2439 | 0.0671 | 0.14229 | 0.418 |
| 21 | 10 | 1 | 0.2195 | 0.0646 | 0.12325 | 0.391 |
| 22 | 9 | 1 | 0.1951 | 0.0619 | 0.10479 | 0.363 |
| 24 | 8 | 1 | 0.1707 | 0.0588 | 0.08696 | 0.335 |
| 25 | 7 | 1 | 0.1463 | 0.0552 | 0.06987 | 0.307 |
| 26 | 6 | 1 | 0.122 | 0.0511 | 0.05364 | 0.277 |
| 27 | 5 | 2 | 0.0732 | 0.0407 | 0.02462 | 0.217 |
| 37 | 3 | 2 | 0.0244 | 0.0241 | 0.00352 | 0.169 |
| 38 | 1 | 1 | 0 | NaN | NA | NA |

**Table S124.** Kirkagac station Kaplan-Meier survival estimates according to SPI-12

| Kaplan-Meier Wet to Dry (SPI12) | | | | | | |
| --- | --- | --- | --- | --- | --- | --- |
|  |  | n | events | median | 0.95LCL | 0.95UCL |
|  |  | 34 | 34 | 23.5 | 19 | 40 |
| time | n.risk | n.event | survival | std.err | lower 95% CL | upper 95% CL |
| 1 | 34 | 2 | 0.9412 | 0.0404 | 0.86532 | 1 |
| 2 | 32 | 1 | 0.9118 | 0.0486 | 0.82124 | 1 |
| 3 | 31 | 1 | 0.8824 | 0.0553 | 0.78044 | 0.998 |
| 4 | 30 | 1 | 0.8529 | 0.0607 | 0.74183 | 0.981 |
| 5 | 29 | 1 | 0.8235 | 0.0654 | 0.70486 | 0.962 |
| 8 | 28 | 1 | 0.7941 | 0.0693 | 0.6692 | 0.942 |
| 14 | 27 | 1 | 0.7647 | 0.0727 | 0.63463 | 0.921 |
| 15 | 26 | 1 | 0.7353 | 0.0757 | 0.601 | 0.9 |
| 16 | 25 | 1 | 0.7059 | 0.0781 | 0.5682 | 0.877 |
| 17 | 24 | 1 | 0.6765 | 0.0802 | 0.53616 | 0.853 |
| 18 | 23 | 1 | 0.6471 | 0.082 | 0.50481 | 0.829 |
| 19 | 22 | 1 | 0.6176 | 0.0833 | 0.47412 | 0.805 |
| 20 | 21 | 1 | 0.5882 | 0.0844 | 0.44403 | 0.779 |
| 21 | 20 | 1 | 0.5588 | 0.0852 | 0.41454 | 0.753 |
| 22 | 19 | 1 | 0.5294 | 0.0856 | 0.38562 | 0.727 |
| 23 | 18 | 1 | 0.5 | 0.0857 | 0.35726 | 0.7 |
| 24 | 17 | 1 | 0.4706 | 0.0856 | 0.32946 | 0.672 |
| 25 | 16 | 1 | 0.4412 | 0.0852 | 0.30222 | 0.644 |
| 36 | 15 | 1 | 0.4118 | 0.0844 | 0.27553 | 0.615 |
| 37 | 14 | 1 | 0.3824 | 0.0833 | 0.24942 | 0.586 |
| 38 | 13 | 1 | 0.3529 | 0.082 | 0.2239 | 0.556 |
| 39 | 12 | 1 | 0.3235 | 0.0802 | 0.19899 | 0.526 |
| 40 | 11 | 1 | 0.2941 | 0.0781 | 0.17473 | 0.495 |
| 41 | 10 | 1 | 0.2647 | 0.0757 | 0.15117 | 0.464 |
| 42 | 9 | 1 | 0.2353 | 0.0727 | 0.12836 | 0.431 |
| 65 | 8 | 1 | 0.2059 | 0.0693 | 0.10639 | 0.398 |
| 66 | 7 | 1 | 0.1765 | 0.0654 | 0.08537 | 0.365 |
| 67 | 6 | 1 | 0.1471 | 0.0607 | 0.06545 | 0.33 |
| 68 | 5 | 1 | 0.1176 | 0.0553 | 0.04686 | 0.295 |
| 69 | 4 | 1 | 0.0882 | 0.0486 | 0.02995 | 0.26 |
| 70 | 3 | 1 | 0.0588 | 0.0404 | 0.01533 | 0.226 |
| 87 | 2 | 1 | 0.0294 | 0.029 | 0.00427 | 0.203 |
| 88 | 1 | 1 | 0 | NaN | NA | NA |

**Table S125.** Kirkagac station Kaplan-Meier drought risk estimates according to SPI-3, 6, and 12

| Drought Risk (SPI3) | | Drought Risk (SPI6) | | Drought Risk (SPI12) | |
| --- | --- | --- | --- | --- | --- |
| Time | Drought Risk | Time | Drought Risk | Time | Drought Risk |
| 1 | 0.1282 | 1 | 0.1463 | 1 | 0.0588 |
| 2 | 0.1795 | 2 | 0.2439 | 2 | 0.0882 |
| 3 | 0.2821 | 3 | 0.2927 | 3 | 0.1176 |
| 4 | 0.359 | 4 | 0.3171 | 4 | 0.1471 |
| 5 | 0.4103 | 5 | 0.3659 | 5 | 0.1765 |
| 6 | 0.4872 | 6 | 0.3902 | 6 | 0.1863 |
| 7 | 0.5128 | 7 | 0.4146 | 8 | 0.2059 |
| 8 | 0.5641 | 10 | 0.439 | 12 | 0.2255 |
| 9 | 0.641 | 11 | 0.4878 | 14 | 0.2353 |
| 11 | 0.6667 | 12 | 0.5122 | 15 | 0.2647 |
| 12 | 0.6923 | 13 | 0.5366 | 16 | 0.2941 |
| 13 | 0.7436 | 15 | 0.6098 | 17 | 0.3235 |
| 14 | 0.7692 | 16 | 0.6585 | 18 | 0.3529 |
| 15 | 0.7949 | 17 | 0.6829 | 19 | 0.3824 |
| 16 | 0.8718 | 18 | 0.7073 | 20 | 0.4118 |
| 17 | 0.8974 | 19 | 0.7317 | 21 | 0.4412 |
| 18 | 0.9231 | 20 | 0.7561 | 22 | 0.4706 |
| 24 | 0.9487 | 21 | 0.7805 | 23 | 0.5 |
| 25 | 1 | 22 | 0.8049 | 24 | 0.5294 |
|  |  | 24 | 0.8293 | 25 | 0.5588 |
|  |  | 25 | 0.8537 | 36 | 0.5882 |
|  |  | 26 | 0.878 | 37 | 0.6176 |
|  |  | 27 | 0.9268 | 38 | 0.6471 |
|  |  | 37 | 0.9756 | 39 | 0.6765 |
|  |  | 38 | 1 | 40 | 0.7059 |
|  |  |  |  | 41 | 0.7353 |
|  |  |  |  | 42 | 0.7647 |
|  |  |  |  | 65 | 0.7941 |
|  |  |  |  | 66 | 0.8235 |
|  |  |  |  | 67 | 0.8529 |
|  |  |  |  | 68 | 0.8824 |
|  |  |  |  | 69 | 0.9118 |
|  |  |  |  | 70 | 0.9412 |
|  |  |  |  | 87 | 0.9706 |
|  |  |  |  | 88 | 1 |

**Table S126.** Kirkagac station Kaplan-Meier survival estimates according to SPEI-3

| Kaplan-Meier Wet to Dry (SPEI3) | | | | | | | |
| --- | --- | --- | --- | --- | --- | --- | --- |
|  |  | n | events | median | 0.95LCL | 0.95UCL |
|  |  | 48 | 48 | 5 | 3 | 8 |
| time | n.risk | n.event | survival | std.err | lower 95% CI | upper 95% CI |
| 1 | 48 | 6 | 0.875 | 0.0477 | 0.7863 | 0.974 |
| 2 | 42 | 7 | 0.7292 | 0.0641 | 0.6137 | 0.866 |
| 3 | 35 | 6 | 0.6042 | 0.0706 | 0.4805 | 0.76 |
| 4 | 29 | 4 | 0.5208 | 0.0721 | 0.3971 | 0.683 |
| 5 | 25 | 3 | 0.4583 | 0.0719 | 0.337 | 0.623 |
| 6 | 22 | 1 | 0.4375 | 0.0716 | 0.3174 | 0.603 |
| 7 | 21 | 2 | 0.3958 | 0.0706 | 0.2791 | 0.561 |
| 8 | 19 | 3 | 0.3333 | 0.068 | 0.2234 | 0.497 |
| 9 | 16 | 4 | 0.25 | 0.0625 | 0.1532 | 0.408 |
| 10 | 12 | 3 | 0.1875 | 0.0563 | 0.1041 | 0.338 |
| 11 | 9 | 1 | 0.1667 | 0.0538 | 0.0885 | 0.314 |
| 12 | 8 | 1 | 0.1458 | 0.0509 | 0.0735 | 0.289 |
| 13 | 7 | 3 | 0.0833 | 0.0399 | 0.0326 | 0.213 |
| 18 | 4 | 1 | 0.0625 | 0.0349 | 0.0209 | 0.187 |
| 19 | 3 | 1 | 0.0417 | 0.0288 | 0.0107 | 0.162 |
| 25 | 2 | 1 | 0.0208 | 0.0206 | 0.003 | 0.145 |
| 48 | 1 | 1 | 0 | NaN | NA | NA |

**Table S127.** Kirkagac station Kaplan-Meier survival estimates according to SPEI-6

| Kaplan-Meier Wet to Dry (SPEI6) | | | | | | | |
| --- | --- | --- | --- | --- | --- | --- | --- |
|  |  | n | events | median | 0.95LCL | 0.95UCL |
|  |  | 48 | 48 | 17 | 15 | 20 |
| time | n.risk | n.event | survival | std.err | lower 95% CI | upper 95% CI |
| 1 | 48 | 3 | 0.9375 | 0.0349 | 0.8715 | 1.000 |
| 2 | 45 | 2 | 0.8958 | 0.0441 | 0.8135 | 0.987 |
| 3 | 43 | 1 | 0.875 | 0.0477 | 0.7863 | 0.974 |
| 4 | 42 | 1 | 0.8542 | 0.0509 | 0.7599 | 0.96 |
| 5 | 41 | 1 | 0.8333 | 0.0538 | 0.7343 | 0.946 |
| 6 | 40 | 1 | 0.8125 | 0.0563 | 0.7093 | 0.931 |
| 7 | 39 | 3 | 0.75 | 0.0625 | 0.637 | 0.883 |
| 8 | 36 | 2 | 0.7083 | 0.0656 | 0.5907 | 0.849 |
| 9 | 34 | 1 | 0.6875 | 0.0669 | 0.5681 | 0.832 |
| 10 | 33 | 1 | 0.6667 | 0.068 | 0.5458 | 0.814 |
| 14 | 32 | 1 | 0.6458 | 0.069 | 0.5238 | 0.796 |
| 15 | 31 | 3 | 0.5833 | 0.0712 | 0.4593 | 0.741 |
| 16 | 28 | 3 | 0.5208 | 0.0721 | 0.3971 | 0.683 |
| 17 | 25 | 2 | 0.4792 | 0.0721 | 0.3568 | 0.644 |
| 18 | 23 | 3 | 0.4167 | 0.0712 | 0.2981 | 0.582 |
| 19 | 20 | 2 | 0.375 | 0.0699 | 0.2603 | 0.54 |
| 20 | 18 | 2 | 0.3333 | 0.068 | 0.2234 | 0.497 |
| 21 | 16 | 2 | 0.2917 | 0.0656 | 0.1877 | 0.453 |
| 22 | 14 | 2 | 0.25 | 0.0625 | 0.1532 | 0.408 |
| 23 | 12 | 1 | 0.2292 | 0.0607 | 0.1364 | 0.385 |
| 24 | 11 | 1 | 0.2083 | 0.0586 | 0.12 | 0.362 |
| 25 | 10 | 1 | 0.1875 | 0.0563 | 0.1041 | 0.338 |
| 26 | 9 | 1 | 0.1667 | 0.0538 | 0.0885 | 0.314 |
| 27 | 8 | 1 | 0.1458 | 0.0509 | 0.0735 | 0.289 |
| 37 | 7 | 1 | 0.125 | 0.0477 | 0.0591 | 0.264 |
| 38 | 6 | 1 | 0.1042 | 0.0441 | 0.0454 | 0.239 |
| 39 | 5 | 1 | 0.0833 | 0.0399 | 0.0326 | 0.213 |
| 40 | 4 | 1 | 0.0625 | 0.0349 | 0.0209 | 0.187 |
| 41 | 3 | 1 | 0.0417 | 0.0288 | 0.0107 | 0.162 |
| 42 | 2 | 1 | 0.0208 | 0.0206 | 0.003 | 0.145 |
| 79 | 1 | 1 | 0 | NaN | NA | NA |

**Table S128.** Kirkagac station Kaplan-Meier survival estimates according to SPEI-12

| Kaplan-Meier Wet to Dry (SPEI12) | | | | | | | |
| --- | --- | --- | --- | --- | --- | --- | --- |
|  |  | n | events | median | 0.95LCL | 0.95UCL |
|  |  | 41 | 41 | 23 | 20 | 27 |
| time | n.risk | n.event | survival | std.err | lower 95% CI | upper 95% CI |
| 1 | 41 | 2 | 0.9512 | 0.0336 | 0.88752 | 1.000 |
| 2 | 39 | 1 | 0.9268 | 0.0407 | 0.85045 | 1.000 |
| 3 | 38 | 2 | 0.878 | 0.0511 | 0.78339 | 0.984 |
| 4 | 36 | 2 | 0.8293 | 0.0588 | 0.72173 | 0.953 |
| 5 | 34 | 1 | 0.8049 | 0.0619 | 0.69227 | 0.936 |
| 8 | 33 | 1 | 0.7805 | 0.0646 | 0.66354 | 0.918 |
| 9 | 32 | 1 | 0.7561 | 0.0671 | 0.63544 | 0.9 |
| 17 | 31 | 1 | 0.7317 | 0.0692 | 0.60791 | 0.881 |
| 18 | 30 | 1 | 0.7073 | 0.0711 | 0.5809 | 0.861 |
| 19 | 29 | 2 | 0.6585 | 0.0741 | 0.52827 | 0.821 |
| 20 | 27 | 2 | 0.6098 | 0.0762 | 0.47732 | 0.779 |
| 21 | 25 | 2 | 0.561 | 0.0775 | 0.4279 | 0.735 |
| 22 | 23 | 2 | 0.5122 | 0.0781 | 0.37993 | 0.691 |
| 23 | 21 | 2 | 0.4634 | 0.0779 | 0.33337 | 0.644 |
| 24 | 19 | 2 | 0.4146 | 0.0769 | 0.28821 | 0.597 |
| 25 | 17 | 2 | 0.3659 | 0.0752 | 0.24451 | 0.547 |
| 26 | 15 | 1 | 0.3415 | 0.0741 | 0.22322 | 0.522 |
| 27 | 14 | 1 | 0.3171 | 0.0727 | 0.20233 | 0.497 |
| 28 | 13 | 1 | 0.2927 | 0.0711 | 0.18186 | 0.471 |
| 29 | 12 | 1 | 0.2683 | 0.0692 | 0.16184 | 0.445 |
| 32 | 11 | 1 | 0.2439 | 0.0671 | 0.14229 | 0.418 |
| 33 | 10 | 1 | 0.2195 | 0.0646 | 0.12325 | 0.391 |
| 34 | 9 | 1 | 0.1951 | 0.0619 | 0.10479 | 0.363 |
| 35 | 8 | 1 | 0.1707 | 0.0588 | 0.08696 | 0.335 |
| 39 | 7 | 1 | 0.1463 | 0.0552 | 0.06987 | 0.307 |
| 40 | 6 | 1 | 0.122 | 0.0511 | 0.05364 | 0.277 |
| 41 | 5 | 1 | 0.0976 | 0.0463 | 0.03846 | 0.248 |
| 42 | 4 | 1 | 0.0732 | 0.0407 | 0.02462 | 0.217 |
| 43 | 3 | 1 | 0.0488 | 0.0336 | 0.01262 | 0.188 |
| 44 | 2 | 1 | 0.0244 | 0.0241 | 0.00352 | 0.169 |
| 87 | 1 | 1 | 0 | NaN | NA | NA |

**Table S129.** Kirkagac station Kaplan-Meier drought risk estimates according to SPEI-3, 6, and 12

| Drought Risk (SPEI3) | | Drought Risk (SPEI6) | | Drought Risk (SPEI12) | |
| --- | --- | --- | --- | --- | --- |
| Time | Drought Risk | Time | Drought Risk | Time | Drought Risk |
| 1 | 0.125 | 1 | 0.0625 | 1 | 0.0488 |
| 2 | 0.2708 | 2 | 0.1042 | 2 | 0.0732 |
| 3 | 0.3958 | 3 | 0.125 | 3 | 0.122 |
| 4 | 0.4792 | 4 | 0.1458 | 4 | 0.1707 |
| 5 | 0.5417 | 5 | 0.1667 | 5 | 0.1951 |
| 6 | 0.5625 | 6 | 0.1875 | 6 | 0.203233 |
| 7 | 0.6042 | 7 | 0.25 | 8 | 0.2195 |
| 8 | 0.6667 | 8 | 0.2917 | 9 | 0.2439 |
| 9 | 0.75 | 9 | 0.3125 | 12 | 0.25305 |
| 10 | 0.8125 | 10 | 0.3333 | 17 | 0.2683 |
| 11 | 0.8333 | 12 | 0.34375 | 18 | 0.2927 |
| 12 | 0.8542 | 14 | 0.3542 | 19 | 0.3415 |
| 13 | 0.9167 | 15 | 0.4167 | 20 | 0.3902 |
| 18 | 0.9375 | 16 | 0.4792 | 21 | 0.439 |
| 19 | 0.9583 | 17 | 0.5208 | 22 | 0.4878 |
| 25 | 0.9792 | 18 | 0.5833 | 23 | 0.5366 |
| 48 | 1 | 19 | 0.625 | 24 | 0.5854 |
|  |  | 20 | 0.6667 | 25 | 0.6341 |
|  |  | 21 | 0.7083 | 26 | 0.6585 |
|  |  | 22 | 0.75 | 27 | 0.6829 |
|  |  | 23 | 0.7708 | 28 | 0.7073 |
|  |  | 24 | 0.7917 | 29 | 0.7317 |
|  |  | 25 | 0.8125 | 32 | 0.7561 |
|  |  | 26 | 0.8333 | 33 | 0.7805 |
|  |  | 27 | 0.8542 | 34 | 0.8049 |
|  |  | 37 | 0.875 | 35 | 0.8293 |
|  |  | 38 | 0.8958 | 39 | 0.8537 |
|  |  | 39 | 0.9167 | 40 | 0.878 |
|  |  | 40 | 0.9375 | 41 | 0.9024 |
|  |  | 41 | 0.9583 | 42 | 0.9268 |
|  |  | 42 | 0.9792 | 43 | 0.9512 |
|  |  | 79 | 1 | 44 | 0.9756 |
|  |  |  |  | 87 | 1 |

**Table S130.** Kula station Kaplan-Meier survival estimates according to SPI-3

| Kaplan-Meier Wet to Dry (SPI3) | | | | | | |
| --- | --- | --- | --- | --- | --- | --- |
|  |  | n | events | median | 0.95LCL | 0.95UCL |
|  |  | 118 | 118 | 8 | 7 | 10 |
| time | n.risk | n.event | survival | std.err | lower 95% CL | upper 95% CL |
| 1 | 118 | 5 | 0.95763 | 0.01854 | 0.92196 | 0.9947 |
| 2 | 113 | 5 | 0.91525 | 0.02564 | 0.86636 | 0.9669 |
| 3 | 108 | 6 | 0.86441 | 0.03152 | 0.80479 | 0.9284 |
| 4 | 102 | 3 | 0.83898 | 0.03384 | 0.77522 | 0.908 |
| 5 | 99 | 10 | 0.75424 | 0.03963 | 0.68042 | 0.8361 |
| 6 | 89 | 12 | 0.65254 | 0.04383 | 0.57204 | 0.7444 |
| 7 | 77 | 13 | 0.54237 | 0.04586 | 0.45954 | 0.6401 |
| 8 | 64 | 7 | 0.48305 | 0.046 | 0.4008 | 0.5822 |
| 9 | 57 | 6 | 0.4322 | 0.0456 | 0.35146 | 0.5315 |
| 10 | 51 | 7 | 0.37288 | 0.04452 | 0.29509 | 0.4712 |
| 11 | 44 | 7 | 0.31356 | 0.04271 | 0.24009 | 0.4095 |
| 12 | 37 | 3 | 0.28814 | 0.04169 | 0.21699 | 0.3826 |
| 13 | 34 | 5 | 0.24576 | 0.03963 | 0.17916 | 0.3371 |
| 14 | 29 | 4 | 0.21186 | 0.03762 | 0.1496 | 0.3 |
| 15 | 25 | 2 | 0.19492 | 0.03647 | 0.13508 | 0.2813 |
| 17 | 23 | 2 | 0.17797 | 0.03521 | 0.12076 | 0.2623 |
| 18 | 21 | 2 | 0.16102 | 0.03384 | 0.10666 | 0.2431 |
| 19 | 19 | 1 | 0.15254 | 0.0331 | 0.0997 | 0.2334 |
| 20 | 18 | 3 | 0.12712 | 0.03066 | 0.07923 | 0.204 |
| 21 | 15 | 1 | 0.11864 | 0.02977 | 0.07256 | 0.194 |
| 22 | 14 | 3 | 0.09322 | 0.02676 | 0.0531 | 0.1636 |
| 23 | 11 | 2 | 0.07627 | 0.02443 | 0.04071 | 0.1429 |
| 24 | 9 | 3 | 0.05085 | 0.02022 | 0.02332 | 0.1109 |
| 25 | 6 | 3 | 0.02542 | 0.01449 | 0.00832 | 0.0777 |
| 26 | 3 | 1 | 0.01695 | 0.01188 | 0.00429 | 0.067 |
| 29 | 2 | 1 | 0.00847 | 0.00844 | 0.0012 | 0.0597 |
| 49 | 1 | 1 | 0 | NaN | NA | NA |

**Table S131.** Kula station Kaplan-Meier survival estimates according to SPI-6

| Kaplan-Meier Wet to Dry (SPI6) | | | | | | |
| --- | --- | --- | --- | --- | --- | --- |
|  |  | n | events | median | 0.95LCL | 0.95UCL |
|  |  | 124 | 124 | 11.5 | 10 | 16 |
| time | n.risk | n.event | survival | std.err | lower 95% CL | upper 95% CL |
| 1 | 124 | 4 | 0.96774 | 0.01587 | 0.93714 | 0.9993 |
| 2 | 120 | 7 | 0.91129 | 0.02553 | 0.8626 | 0.9627 |
| 3 | 113 | 6 | 0.8629 | 0.03089 | 0.80444 | 0.9256 |
| 4 | 107 | 2 | 0.84677 | 0.03235 | 0.78569 | 0.9126 |
| 5 | 105 | 2 | 0.83065 | 0.03368 | 0.76719 | 0.8994 |
| 6 | 103 | 7 | 0.77419 | 0.03755 | 0.70399 | 0.8514 |
| 7 | 96 | 7 | 0.71774 | 0.04042 | 0.64274 | 0.8015 |
| 8 | 89 | 7 | 0.66129 | 0.0425 | 0.58302 | 0.7501 |
| 9 | 82 | 7 | 0.60484 | 0.0439 | 0.52463 | 0.6973 |
| 10 | 75 | 7 | 0.54839 | 0.04469 | 0.46743 | 0.6434 |
| 11 | 68 | 6 | 0.5 | 0.0449 | 0.4193 | 0.5962 |
| 12 | 62 | 4 | 0.46774 | 0.04481 | 0.38767 | 0.5643 |
| 13 | 58 | 2 | 0.45161 | 0.04469 | 0.37199 | 0.5483 |
| 14 | 56 | 2 | 0.43548 | 0.04453 | 0.3564 | 0.5321 |
| 15 | 54 | 3 | 0.41129 | 0.04419 | 0.33319 | 0.5077 |
| 16 | 51 | 2 | 0.39516 | 0.0439 | 0.31784 | 0.4913 |
| 17 | 49 | 3 | 0.37097 | 0.04338 | 0.29498 | 0.4665 |
| 18 | 46 | 2 | 0.35484 | 0.04297 | 0.27987 | 0.4499 |
| 19 | 44 | 2 | 0.33871 | 0.0425 | 0.26486 | 0.4331 |
| 22 | 42 | 1 | 0.33065 | 0.04225 | 0.2574 | 0.4247 |
| 23 | 41 | 2 | 0.31452 | 0.0417 | 0.24255 | 0.4078 |
| 24 | 39 | 3 | 0.29032 | 0.04076 | 0.22048 | 0.3823 |
| 25 | 36 | 4 | 0.25806 | 0.03929 | 0.19148 | 0.3478 |
| 26 | 32 | 3 | 0.23387 | 0.03801 | 0.17007 | 0.3216 |
| 27 | 29 | 2 | 0.21774 | 0.03706 | 0.15598 | 0.304 |
| 28 | 27 | 2 | 0.20161 | 0.03603 | 0.14204 | 0.2862 |
| 31 | 25 | 1 | 0.19355 | 0.03548 | 0.13513 | 0.2772 |
| 32 | 24 | 3 | 0.16935 | 0.03368 | 0.11469 | 0.2501 |
| 33 | 21 | 3 | 0.14516 | 0.03163 | 0.0947 | 0.2225 |
| 34 | 18 | 3 | 0.12097 | 0.02928 | 0.07527 | 0.1944 |
| 35 | 15 | 3 | 0.09677 | 0.02655 | 0.05652 | 0.1657 |
| 36 | 12 | 3 | 0.07258 | 0.0233 | 0.03869 | 0.1362 |
| 37 | 9 | 2 | 0.05645 | 0.02073 | 0.02749 | 0.1159 |
| 38 | 7 | 3 | 0.03226 | 0.01587 | 0.0123 | 0.0846 |
| 39 | 4 | 2 | 0.01613 | 0.01131 | 0.00408 | 0.0638 |
| 40 | 2 | 1 | 0.00806 | 0.00803 | 0.00115 | 0.0568 |
| 49 | 1 | 1 | 0 | NaN | NA | NA |

**Table S132.** Kula station Kaplan-Meier survival estimates according to SPI-12

| Kaplan-Meier Wet to Dry (SPI12) | | | | | | |
| --- | --- | --- | --- | --- | --- | --- |
|  |  | n | events | median | 0.95LCL | 0.95UCL |
|  |  | 100 | 100 | 16.5 | 14 | 22 |
| time | n.risk | n.event | survival | std.err | lower 95% CL | upper 95% CL |
| 1 | 100 | 3 | 0.97 | 0.01706 | 0.93714 | 1 |
| 2 | 97 | 6 | 0.91 | 0.02862 | 0.8556 | 0.9679 |
| 3 | 91 | 5 | 0.86 | 0.0347 | 0.79461 | 0.9308 |
| 4 | 86 | 5 | 0.81 | 0.03923 | 0.73665 | 0.8907 |
| 5 | 81 | 2 | 0.79 | 0.04073 | 0.71407 | 0.874 |
| 6 | 79 | 2 | 0.77 | 0.04208 | 0.69178 | 0.8571 |
| 7 | 77 | 2 | 0.75 | 0.0433 | 0.66976 | 0.8399 |
| 8 | 75 | 2 | 0.73 | 0.0444 | 0.64797 | 0.8224 |
| 9 | 73 | 1 | 0.72 | 0.0449 | 0.63716 | 0.8136 |
| 10 | 72 | 2 | 0.7 | 0.04583 | 0.61571 | 0.7958 |
| 11 | 70 | 2 | 0.68 | 0.04665 | 0.59445 | 0.7779 |
| 12 | 68 | 3 | 0.65 | 0.0477 | 0.56293 | 0.7505 |
| 13 | 65 | 3 | 0.62 | 0.04854 | 0.53181 | 0.7228 |
| 14 | 62 | 4 | 0.58 | 0.04936 | 0.4909 | 0.6853 |
| 15 | 58 | 4 | 0.54 | 0.04984 | 0.45064 | 0.6471 |
| 16 | 54 | 4 | 0.5 | 0.05 | 0.41101 | 0.6083 |
| 17 | 50 | 2 | 0.48 | 0.04996 | 0.39142 | 0.5886 |
| 18 | 48 | 2 | 0.46 | 0.04984 | 0.37199 | 0.5688 |
| 19 | 46 | 2 | 0.44 | 0.04964 | 0.35272 | 0.5489 |
| 20 | 44 | 2 | 0.42 | 0.04936 | 0.3336 | 0.5288 |
| 21 | 42 | 1 | 0.41 | 0.04918 | 0.3241 | 0.5187 |
| 22 | 41 | 2 | 0.39 | 0.04877 | 0.30522 | 0.4983 |
| 23 | 39 | 2 | 0.37 | 0.04828 | 0.2865 | 0.4778 |
| 24 | 37 | 2 | 0.35 | 0.0477 | 0.26796 | 0.4572 |
| 25 | 35 | 1 | 0.34 | 0.04737 | 0.25875 | 0.4468 |
| 26 | 34 | 1 | 0.33 | 0.04702 | 0.24959 | 0.4363 |
| 27 | 33 | 2 | 0.31 | 0.04625 | 0.2314 | 0.4153 |
| 28 | 31 | 2 | 0.29 | 0.04538 | 0.21341 | 0.3941 |
| 29 | 29 | 1 | 0.28 | 0.0449 | 0.20449 | 0.3834 |
| 30 | 28 | 1 | 0.27 | 0.0444 | 0.19561 | 0.3727 |
| 31 | 27 | 1 | 0.26 | 0.04386 | 0.1868 | 0.3619 |
| 32 | 26 | 1 | 0.25 | 0.0433 | 0.17804 | 0.3511 |
| 33 | 25 | 2 | 0.23 | 0.04208 | 0.16069 | 0.3292 |
| 36 | 23 | 2 | 0.21 | 0.04073 | 0.14359 | 0.3071 |
| 37 | 21 | 1 | 0.2 | 0.04 | 0.13514 | 0.296 |
| 78 | 20 | 1 | 0.19 | 0.03923 | 0.12677 | 0.2848 |
| 79 | 19 | 1 | 0.18 | 0.03842 | 0.11847 | 0.2735 |
| 80 | 18 | 1 | 0.17 | 0.03756 | 0.11025 | 0.2621 |
| 81 | 17 | 1 | 0.16 | 0.03666 | 0.10211 | 0.2507 |
| 82 | 16 | 1 | 0.15 | 0.03571 | 0.09407 | 0.2392 |
| 93 | 15 | 1 | 0.14 | 0.0347 | 0.08613 | 0.2276 |
| 129 | 14 | 1 | 0.13 | 0.03363 | 0.0783 | 0.2158 |
| 130 | 13 | 1 | 0.12 | 0.0325 | 0.07058 | 0.204 |
| 131 | 12 | 1 | 0.11 | 0.03129 | 0.06299 | 0.1921 |
| 132 | 11 | 1 | 0.1 | 0.03 | 0.05554 | 0.18 |
| 133 | 10 | 1 | 0.09 | 0.02862 | 0.04826 | 0.1678 |
| 134 | 9 | 1 | 0.08 | 0.02713 | 0.04116 | 0.1555 |
| 135 | 8 | 1 | 0.07 | 0.02551 | 0.03426 | 0.143 |
| 136 | 7 | 1 | 0.06 | 0.02375 | 0.02762 | 0.1303 |
| 137 | 6 | 1 | 0.05 | 0.02179 | 0.02128 | 0.1175 |
| 138 | 5 | 1 | 0.04 | 0.0196 | 0.01531 | 0.1045 |
| 139 | 4 | 1 | 0.03 | 0.01706 | 0.00984 | 0.0914 |
| 140 | 3 | 1 | 0.02 | 0.014 | 0.00507 | 0.0789 |
| 141 | 2 | 1 | 0.01 | 0.00995 | 0.00142 | 0.0703 |
| 142 | 1 | 1 | 0 | NaN | NA | NA |

**Table S133.** Kula station Kaplan-Meier drought risk estimates according to SPI-3, 6, and 12

| Drought Risk (SPI3) | | Drought Risk (SPI6) | | Drought Risk (SPI12) | |
| --- | --- | --- | --- | --- | --- |
| Time | Drought Risk | Time | Drought Risk | Time | Drought Risk |
| 1 | 0.04237 | 1 | 0.03226 | 1 | 0.03 |
| 2 | 0.08475 | 2 | 0.08871 | 2 | 0.09 |
| 3 | 0.13559 | 3 | 0.1371 | 3 | 0.14 |
| 4 | 0.16102 | 4 | 0.15323 | 4 | 0.19 |
| 5 | 0.24576 | 5 | 0.16935 | 5 | 0.21 |
| 6 | 0.34746 | 6 | 0.22581 | 6 | 0.23 |
| 7 | 0.45763 | 7 | 0.28226 | 7 | 0.25 |
| 8 | 0.51695 | 8 | 0.33871 | 8 | 0.27 |
| 9 | 0.5678 | 9 | 0.39516 | 9 | 0.28 |
| 10 | 0.62712 | 10 | 0.45161 | 10 | 0.3 |
| 11 | 0.68644 | 11 | 0.5 | 11 | 0.32 |
| 12 | 0.71186 | 12 | 0.53226 | 12 | 0.35 |
| 13 | 0.75424 | 13 | 0.54839 | 13 | 0.38 |
| 14 | 0.78814 | 14 | 0.56452 | 14 | 0.42 |
| 15 | 0.80508 | 15 | 0.58871 | 15 | 0.46 |
| 17 | 0.82203 | 16 | 0.60484 | 16 | 0.5 |
| 18 | 0.83898 | 17 | 0.62903 | 17 | 0.52 |
| 19 | 0.84746 | 18 | 0.64516 | 18 | 0.54 |
| 20 | 0.87288 | 19 | 0.66129 | 19 | 0.56 |
| 21 | 0.88136 | 22 | 0.66935 | 20 | 0.58 |
| 22 | 0.90678 | 23 | 0.68548 | 21 | 0.59 |
| 23 | 0.92373 | 24 | 0.70968 | 22 | 0.61 |
| 24 | 0.94915 | 25 | 0.74194 | 23 | 0.63 |
| 25 | 0.97458 | 26 | 0.76613 | 24 | 0.65 |
| 26 | 0.98305 | 27 | 0.78226 | 25 | 0.66 |
| 29 | 0.99153 | 28 | 0.79839 | 26 | 0.67 |
| 49 | 1 | 31 | 0.80645 | 27 | 0.69 |
|  |  | 32 | 0.83065 | 28 | 0.71 |
|  |  | 33 | 0.85484 | 29 | 0.72 |
|  |  | 34 | 0.87903 | 30 | 0.73 |
|  |  | 35 | 0.90323 | 31 | 0.74 |
|  |  | 36 | 0.92742 | 32 | 0.75 |
|  |  | 37 | 0.94355 | 33 | 0.77 |
|  |  | 38 | 0.96774 | 36 | 0.79 |
|  |  | 39 | 0.98387 | 37 | 0.8 |
|  |  | 40 | 0.99194 | 78 | 0.81 |
|  |  | 49 | 1 | 79 | 0.82 |
|  |  |  |  | 80 | 0.83 |
|  |  |  |  | 81 | 0.84 |
|  |  |  |  | 82 | 0.85 |
|  |  |  |  | 93 | 0.86 |
|  |  |  |  | 129 | 0.87 |
|  |  |  |  | 130 | 0.88 |
|  |  |  |  | 131 | 0.89 |
|  |  |  |  | 132 | 0.9 |
|  |  |  |  | 133 | 0.91 |
|  |  |  |  | 134 | 0.92 |
|  |  |  |  | 135 | 0.93 |
|  |  |  |  | 136 | 0.94 |
|  |  |  |  | 137 | 0.95 |
|  |  |  |  | 138 | 0.96 |
|  |  |  |  | 139 | 0.97 |
|  |  |  |  | 140 | 0.98 |
|  |  |  |  | 141 | 0.99 |
|  |  |  |  | 142 | 1 |

**Table S134.** Kula station Kaplan-Meier survival estimates according to SPEI-3

| Kaplan-Meier Wet to Dry (SPEI3) | | | | | | | |
| --- | --- | --- | --- | --- | --- | --- | --- |
|  |  | n | events | median | 0.95LCL | 0.95UCL |
|  |  | 61 | 61 | 8 | 7 | 9 |
| time | n.risk | n.event | survival | std.err | lower 95% CI | upper 95% CI |
| 1 | 61 | 2 | 0.9672 | 0.0228 | 0.92354 | 1.000 |
| 2 | 59 | 2 | 0.9344 | 0.0317 | 0.87433 | 0.999 |
| 3 | 57 | 5 | 0.8525 | 0.0454 | 0.76795 | 0.946 |
| 4 | 52 | 5 | 0.7705 | 0.0538 | 0.67187 | 0.884 |
| 5 | 47 | 5 | 0.6885 | 0.0593 | 0.58159 | 0.815 |
| 6 | 42 | 4 | 0.623 | 0.0621 | 0.51247 | 0.757 |
| 7 | 38 | 6 | 0.5246 | 0.0639 | 0.41311 | 0.666 |
| 8 | 32 | 6 | 0.4262 | 0.0633 | 0.31856 | 0.57 |
| 9 | 26 | 6 | 0.3279 | 0.0601 | 0.22891 | 0.47 |
| 10 | 20 | 4 | 0.2623 | 0.0563 | 0.17219 | 0.4 |
| 11 | 16 | 2 | 0.2295 | 0.0538 | 0.14491 | 0.363 |
| 17 | 14 | 1 | 0.2131 | 0.0524 | 0.13158 | 0.345 |
| 18 | 13 | 2 | 0.1803 | 0.0492 | 0.10561 | 0.308 |
| 19 | 11 | 1 | 0.1639 | 0.0474 | 0.09301 | 0.289 |
| 20 | 10 | 1 | 0.1475 | 0.0454 | 0.08071 | 0.27 |
| 21 | 9 | 1 | 0.1311 | 0.0432 | 0.06875 | 0.25 |
| 22 | 8 | 2 | 0.0984 | 0.0381 | 0.04601 | 0.21 |
| 23 | 6 | 2 | 0.0656 | 0.0317 | 0.02543 | 0.169 |
| 24 | 4 | 2 | 0.0328 | 0.0228 | 0.00839 | 0.128 |
| 47 | 2 | 1 | 0.0164 | 0.0163 | 0.00235 | 0.115 |
| 48 | 1 | 1 | 0 | NaN | NA | NA |

**Table S135.** Kula station Kaplan-Meier survival estimates according to SPEI-6

| Kaplan-Meier Wet to Dry (SPEI6) | | | | | | | |
| --- | --- | --- | --- | --- | --- | --- | --- |
|  |  | n | events | median | 0.95LCL | 0.95UCL |
|  |  | 62 | 62 | 9.5 | 7 | 17 |
| time | n.risk | n.event | survival | std.err | lower 95% CI | upper 95% CI |
| 1 | 62 | 2 | 0.9677 | 0.0224 | 0.92475 | 1.000 |
| 2 | 60 | 4 | 0.9032 | 0.0375 | 0.83255 | 0.98 |
| 3 | 56 | 3 | 0.8548 | 0.0447 | 0.7715 | 0.947 |
| 4 | 53 | 2 | 0.8226 | 0.0485 | 0.73278 | 0.923 |
| 5 | 51 | 3 | 0.7742 | 0.0531 | 0.67681 | 0.886 |
| 6 | 48 | 5 | 0.6935 | 0.0585 | 0.58778 | 0.818 |
| 7 | 43 | 6 | 0.5968 | 0.0623 | 0.48635 | 0.732 |
| 8 | 37 | 4 | 0.5323 | 0.0634 | 0.42149 | 0.672 |
| 9 | 33 | 2 | 0.5 | 0.0635 | 0.38982 | 0.641 |
| 10 | 31 | 3 | 0.4516 | 0.0632 | 0.34328 | 0.594 |
| 11 | 28 | 1 | 0.4355 | 0.063 | 0.32801 | 0.578 |
| 12 | 27 | 1 | 0.4194 | 0.0627 | 0.31288 | 0.562 |
| 13 | 26 | 1 | 0.4032 | 0.0623 | 0.29788 | 0.546 |
| 16 | 25 | 1 | 0.3871 | 0.0619 | 0.283 | 0.529 |
| 17 | 24 | 2 | 0.3548 | 0.0608 | 0.25367 | 0.496 |
| 18 | 22 | 2 | 0.3226 | 0.0594 | 0.2249 | 0.463 |
| 19 | 20 | 2 | 0.2903 | 0.0576 | 0.19673 | 0.428 |
| 21 | 18 | 1 | 0.2742 | 0.0567 | 0.18288 | 0.411 |
| 22 | 17 | 1 | 0.2581 | 0.0556 | 0.16921 | 0.394 |
| 23 | 16 | 2 | 0.2258 | 0.0531 | 0.14242 | 0.358 |
| 24 | 14 | 2 | 0.1935 | 0.0502 | 0.11645 | 0.322 |
| 25 | 12 | 2 | 0.1613 | 0.0467 | 0.09143 | 0.285 |
| 26 | 10 | 1 | 0.1452 | 0.0447 | 0.07934 | 0.266 |
| 27 | 9 | 2 | 0.1129 | 0.0402 | 0.05619 | 0.227 |
| 28 | 7 | 2 | 0.0806 | 0.0346 | 0.0348 | 0.187 |
| 29 | 5 | 1 | 0.0645 | 0.0312 | 0.025 | 0.166 |
| 36 | 4 | 1 | 0.0484 | 0.0273 | 0.01604 | 0.146 |
| 37 | 3 | 1 | 0.0323 | 0.0224 | 0.00825 | 0.126 |
| 62 | 2 | 1 | 0.0161 | 0.016 | 0.00231 | 0.113 |
| 63 | 1 | 1 | 0 | NaN | NA | NA |

**Table S136.** Kula station Kaplan-Meier survival estimates according to SPEI-12

| Kaplan-Meier Wet to Dry (SPEI12) | | | | | | | |
| --- | --- | --- | --- | --- | --- | --- | --- |
|  |  | n | events | median | 0.95LCL | 0.95UCL |
|  |  | 46 | 46 | 13.5 | 9 | 21 |
| time | n.risk | n.event | survival | std.err | lower 95% CI | upper 95% CI |
| 1 | 46 | 1 | 0.9783 | 0.0215 | 0.93701 | 1.000 |
| 2 | 45 | 2 | 0.9348 | 0.0364 | 0.86609 | 1.000 |
| 3 | 43 | 3 | 0.8696 | 0.0497 | 0.77749 | 0.973 |
| 4 | 40 | 3 | 0.8043 | 0.0585 | 0.6975 | 0.928 |
| 5 | 37 | 2 | 0.7609 | 0.0629 | 0.64707 | 0.895 |
| 6 | 35 | 2 | 0.7174 | 0.0664 | 0.59839 | 0.86 |
| 7 | 33 | 2 | 0.6739 | 0.0691 | 0.55119 | 0.824 |
| 8 | 31 | 2 | 0.6304 | 0.0712 | 0.5053 | 0.787 |
| 9 | 29 | 1 | 0.6087 | 0.072 | 0.48281 | 0.767 |
| 10 | 28 | 1 | 0.587 | 0.0726 | 0.4606 | 0.748 |
| 11 | 27 | 2 | 0.5435 | 0.0734 | 0.41702 | 0.708 |
| 12 | 25 | 1 | 0.5217 | 0.0737 | 0.39563 | 0.688 |
| 13 | 24 | 1 | 0.5 | 0.0737 | 0.37451 | 0.668 |
| 14 | 23 | 1 | 0.4783 | 0.0737 | 0.35366 | 0.647 |
| 15 | 22 | 1 | 0.4565 | 0.0734 | 0.33306 | 0.626 |
| 16 | 21 | 1 | 0.4348 | 0.0731 | 0.31274 | 0.604 |
| 17 | 20 | 1 | 0.413 | 0.0726 | 0.29268 | 0.583 |
| 18 | 19 | 1 | 0.3913 | 0.072 | 0.27289 | 0.561 |
| 19 | 18 | 1 | 0.3696 | 0.0712 | 0.25338 | 0.539 |
| 20 | 17 | 1 | 0.3478 | 0.0702 | 0.23416 | 0.517 |
| 21 | 16 | 2 | 0.3043 | 0.0678 | 0.19662 | 0.471 |
| 22 | 14 | 1 | 0.2826 | 0.0664 | 0.17833 | 0.448 |
| 23 | 13 | 1 | 0.2609 | 0.0647 | 0.16039 | 0.424 |
| 24 | 12 | 1 | 0.2391 | 0.0629 | 0.14281 | 0.4 |
| 27 | 11 | 1 | 0.2174 | 0.0608 | 0.12564 | 0.376 |
| 28 | 10 | 1 | 0.1957 | 0.0585 | 0.1089 | 0.352 |
| 42 | 9 | 1 | 0.1739 | 0.0559 | 0.09264 | 0.326 |
| 43 | 8 | 1 | 0.1522 | 0.053 | 0.07693 | 0.301 |
| 44 | 7 | 1 | 0.1304 | 0.0497 | 0.06185 | 0.275 |
| 45 | 6 | 1 | 0.1087 | 0.0459 | 0.04751 | 0.249 |
| 46 | 5 | 1 | 0.087 | 0.0415 | 0.03409 | 0.222 |
| 61 | 4 | 1 | 0.0652 | 0.0364 | 0.02184 | 0.195 |
| 62 | 3 | 1 | 0.0435 | 0.0301 | 0.01121 | 0.169 |
| 63 | 2 | 1 | 0.0217 | 0.0215 | 0.00313 | 0.151 |
| 87 | 1 | 1 | 0 | NaN | NA | NA |

**Table S137.** Kula station Kaplan-Meier drought risk estimates according to SPEI-3, 6, and 12

| Drought Risk (SPEI3) | | Drought Risk (SPEI6) | | Drought Risk (SPEI12) | |
| --- | --- | --- | --- | --- | --- |
| Time | Drought Risk | Time | Drought Risk | Time | Drought Risk |
| 1 | 0.0328 | 1 | 0.0323 | 1 | 0.0217 |
| 2 | 0.0656 | 2 | 0.0968 | 2 | 0.0652 |
| 3 | 0.1475 | 3 | 0.1452 | 3 | 0.1304 |
| 4 | 0.2295 | 4 | 0.1774 | 4 | 0.1957 |
| 5 | 0.3115 | 5 | 0.2258 | 5 | 0.2391 |
| 6 | 0.377 | 6 | 0.3065 | 6 | 0.2826 |
| 7 | 0.4754 | 7 | 0.4032 | 7 | 0.3261 |
| 8 | 0.5738 | 8 | 0.4677 | 8 | 0.3696 |
| 9 | 0.6721 | 9 | 0.5 | 9 | 0.3913 |
| 10 | 0.7377 | 10 | 0.5484 | 10 | 0.413 |
| 11 | 0.7705 | 11 | 0.5645 | 11 | 0.4565 |
| 12 | 0.773233 | 12 | 0.5806 | 12 | 0.4783 |
| 17 | 0.7869 | 13 | 0.5968 | 13 | 0.5 |
| 18 | 0.8197 | 16 | 0.6129 | 14 | 0.5217 |
| 19 | 0.8361 | 17 | 0.6452 | 15 | 0.5435 |
| 20 | 0.8525 | 18 | 0.6774 | 16 | 0.5652 |
| 21 | 0.8689 | 19 | 0.7097 | 17 | 0.587 |
| 22 | 0.9016 | 21 | 0.7258 | 18 | 0.6087 |
| 23 | 0.9344 | 22 | 0.7419 | 19 | 0.6304 |
| 24 | 0.9672 | 23 | 0.7742 | 20 | 0.6522 |
| 47 | 0.9836 | 24 | 0.8065 | 21 | 0.6957 |
| 48 | 1 | 25 | 0.8387 | 22 | 0.7174 |
|  |  | 26 | 0.8548 | 23 | 0.7391 |
|  |  | 27 | 0.8871 | 24 | 0.7609 |
|  |  | 28 | 0.9194 | 27 | 0.7826 |
|  |  | 29 | 0.9355 | 28 | 0.8043 |
|  |  | 36 | 0.9516 | 42 | 0.8261 |
|  |  | 37 | 0.9677 | 43 | 0.8478 |
|  |  | 62 | 0.9839 | 44 | 0.8696 |
|  |  | 63 | 1 | 45 | 0.8913 |
|  |  |  |  | 46 | 0.913 |
|  |  |  |  | 61 | 0.9348 |
|  |  |  |  | 62 | 0.9565 |
|  |  |  |  | 63 | 0.9783 |
|  |  |  |  | 87 | 1 |

**Table S138.** Manisa station Kaplan-Meier survival estimates according to SPI-3

| Kaplan-Meier Wet to Dry (SPI3) | | | | | | |
| --- | --- | --- | --- | --- | --- | --- |
|  |  | n | events | median | 0.95LCL | 0.95UCL |
|  |  | 148 | 148 | 9 | 8 | 11 |
| time | n.risk | n.event | survival | std.err | lower 95% CL | upper 95% CL |
| 1 | 148 | 7 | 0.9527 | 0.01745 | 0.91911 | 0.9875 |
| 2 | 141 | 9 | 0.89189 | 0.02552 | 0.843242 | 0.9433 |
| 3 | 132 | 13 | 0.80405 | 0.03263 | 0.742583 | 0.8706 |
| 4 | 119 | 11 | 0.72973 | 0.0365 | 0.661577 | 0.8049 |
| 5 | 108 | 9 | 0.66892 | 0.03868 | 0.59724 | 0.7492 |
| 6 | 99 | 3 | 0.64865 | 0.03924 | 0.576122 | 0.7303 |
| 7 | 96 | 7 | 0.60135 | 0.04025 | 0.527424 | 0.6856 |
| 8 | 89 | 8 | 0.5473 | 0.04092 | 0.472703 | 0.6337 |
| 9 | 81 | 8 | 0.49324 | 0.0411 | 0.418929 | 0.5807 |
| 10 | 73 | 10 | 0.42568 | 0.04064 | 0.353026 | 0.5133 |
| 11 | 63 | 8 | 0.37162 | 0.03972 | 0.301382 | 0.4582 |
| 12 | 55 | 2 | 0.35811 | 0.03941 | 0.288628 | 0.4443 |
| 13 | 53 | 3 | 0.33784 | 0.03888 | 0.26962 | 0.4233 |
| 14 | 50 | 2 | 0.32432 | 0.03848 | 0.257033 | 0.4092 |
| 15 | 48 | 7 | 0.27703 | 0.03679 | 0.213545 | 0.3594 |
| 16 | 41 | 8 | 0.22297 | 0.03421 | 0.165058 | 0.3012 |
| 17 | 33 | 4 | 0.19595 | 0.03263 | 0.141384 | 0.2716 |
| 18 | 29 | 5 | 0.16216 | 0.0303 | 0.112437 | 0.2339 |
| 19 | 24 | 3 | 0.14189 | 0.02868 | 0.095476 | 0.2109 |
| 21 | 21 | 1 | 0.13514 | 0.0281 | 0.0899 | 0.2031 |
| 22 | 20 | 2 | 0.12162 | 0.02687 | 0.078882 | 0.1875 |
| 23 | 18 | 2 | 0.10811 | 0.02552 | 0.06806 | 0.1717 |
| 24 | 16 | 2 | 0.09459 | 0.02406 | 0.057465 | 0.1557 |
| 25 | 14 | 2 | 0.08108 | 0.02244 | 0.047138 | 0.1395 |
| 26 | 12 | 5 | 0.0473 | 0.01745 | 0.022952 | 0.0975 |
| 27 | 7 | 2 | 0.03378 | 0.01485 | 0.014273 | 0.08 |
| 28 | 5 | 2 | 0.02027 | 0.01158 | 0.006613 | 0.0621 |
| 29 | 3 | 1 | 0.01351 | 0.00949 | 0.003412 | 0.0535 |
| 30 | 2 | 1 | 0.00676 | 0.00673 | 0.000958 | 0.0476 |
| 37 | 1 | 1 | 0 | NaN | NA | NA |

**Table S139.** Manisa station Kaplan-Meier survival estimates according to SPI-6

| Kaplan-Meier Wet to Dry (SPI6) | | | | | | |
| --- | --- | --- | --- | --- | --- | --- |
|  |  | n | events | median | 0.95LCL | 0.95UCL |
|  |  | 155 | 155 | 11 | 9 | 16 |
| time | n.risk | n.event | survival | std.err | lower 95% CL | upper 95% CL |
| 1 | 155 | 7 | 0.95484 | 0.01668 | 0.922701 | 0.9881 |
| 2 | 148 | 9 | 0.89677 | 0.02444 | 0.850133 | 0.946 |
| 3 | 139 | 9 | 0.83871 | 0.02954 | 0.782761 | 0.8987 |
| 4 | 130 | 7 | 0.79355 | 0.03251 | 0.732319 | 0.8599 |
| 5 | 123 | 7 | 0.74839 | 0.03485 | 0.683098 | 0.8199 |
| 6 | 116 | 10 | 0.68387 | 0.03735 | 0.614454 | 0.7611 |
| 7 | 106 | 7 | 0.63871 | 0.03858 | 0.567391 | 0.719 |
| 8 | 99 | 6 | 0.6 | 0.03935 | 0.527627 | 0.6823 |
| 9 | 93 | 6 | 0.56129 | 0.03986 | 0.488363 | 0.6451 |
| 10 | 87 | 9 | 0.50323 | 0.04016 | 0.430361 | 0.5884 |
| 11 | 78 | 5 | 0.47097 | 0.04009 | 0.398592 | 0.5565 |
| 12 | 73 | 2 | 0.45806 | 0.04002 | 0.385976 | 0.5436 |
| 13 | 71 | 3 | 0.43871 | 0.03986 | 0.36715 | 0.5242 |
| 14 | 68 | 1 | 0.43226 | 0.03979 | 0.3609 | 0.5177 |
| 15 | 67 | 1 | 0.42581 | 0.03972 | 0.354665 | 0.5112 |
| 16 | 66 | 3 | 0.40645 | 0.03945 | 0.336038 | 0.4916 |
| 17 | 63 | 3 | 0.3871 | 0.03912 | 0.317533 | 0.4719 |
| 19 | 60 | 1 | 0.38065 | 0.039 | 0.311393 | 0.4653 |
| 20 | 59 | 2 | 0.36774 | 0.03873 | 0.299154 | 0.4521 |
| 21 | 57 | 1 | 0.36129 | 0.03858 | 0.293056 | 0.4454 |
| 22 | 56 | 2 | 0.34839 | 0.03827 | 0.280904 | 0.4321 |
| 23 | 54 | 2 | 0.33548 | 0.03792 | 0.268811 | 0.4187 |
| 24 | 52 | 3 | 0.31613 | 0.03735 | 0.250787 | 0.3985 |
| 25 | 49 | 4 | 0.29032 | 0.03646 | 0.226979 | 0.3713 |
| 26 | 45 | 2 | 0.27742 | 0.03596 | 0.215176 | 0.3577 |
| 27 | 43 | 2 | 0.26452 | 0.03543 | 0.203445 | 0.3439 |
| 28 | 41 | 2 | 0.25161 | 0.03485 | 0.191787 | 0.3301 |
| 29 | 39 | 4 | 0.22581 | 0.03358 | 0.168709 | 0.3022 |
| 30 | 35 | 4 | 0.2 | 0.03213 | 0.145979 | 0.274 |
| 31 | 31 | 2 | 0.1871 | 0.03132 | 0.134758 | 0.2598 |
| 32 | 29 | 2 | 0.17419 | 0.03046 | 0.123643 | 0.2454 |
| 33 | 27 | 2 | 0.16129 | 0.02954 | 0.112642 | 0.2309 |
| 34 | 25 | 2 | 0.14839 | 0.02855 | 0.101767 | 0.2164 |
| 35 | 23 | 3 | 0.12903 | 0.02693 | 0.085717 | 0.1942 |
| 36 | 20 | 2 | 0.11613 | 0.02573 | 0.075218 | 0.1793 |
| 37 | 18 | 4 | 0.09032 | 0.02302 | 0.054805 | 0.1489 |
| 38 | 14 | 3 | 0.07097 | 0.02062 | 0.04015 | 0.1254 |
| 39 | 11 | 3 | 0.05161 | 0.01777 | 0.026283 | 0.1014 |
| 40 | 8 | 3 | 0.03226 | 0.01419 | 0.013619 | 0.0764 |
| 41 | 5 | 3 | 0.0129 | 0.00906 | 0.003256 | 0.0511 |
| 42 | 2 | 1 | 0.00645 | 0.00643 | 0.000915 | 0.0455 |
| 52 | 1 | 1 | 0 | NaN | NA | NA |

**Table S140.** Manisa station Kaplan-Meier survival estimates according to SPI-12

| Kaplan-Meier Wet to Dry (SPI12) | | | | | | |
| --- | --- | --- | --- | --- | --- | --- |
|  |  | n | events | median | 0.95LCL | 0.95UCL |
|  |  | 158 | 158 | 15 | 13 | 21 |
| time | n.risk | n.event | survival | std.err | lower 95% CL | upper 95% CL |
| 1 | 158 | 6 | 0.96203 | 0.01521 | 0.932679 | 0.9923 |
| 2 | 152 | 7 | 0.91772 | 0.02186 | 0.87586 | 0.9616 |
| 3 | 145 | 7 | 0.87342 | 0.02645 | 0.82308 | 0.9268 |
| 4 | 138 | 7 | 0.82911 | 0.02995 | 0.772451 | 0.8899 |
| 5 | 131 | 6 | 0.79114 | 0.03234 | 0.730229 | 0.8571 |
| 6 | 125 | 5 | 0.75949 | 0.034 | 0.695692 | 0.8291 |
| 7 | 120 | 4 | 0.73418 | 0.03515 | 0.668426 | 0.8064 |
| 8 | 116 | 4 | 0.70886 | 0.03614 | 0.64145 | 0.7834 |
| 9 | 112 | 3 | 0.68987 | 0.0368 | 0.621392 | 0.7659 |
| 10 | 109 | 4 | 0.66456 | 0.03756 | 0.594868 | 0.7424 |
| 11 | 105 | 5 | 0.63291 | 0.03835 | 0.562044 | 0.7127 |
| 12 | 100 | 7 | 0.58861 | 0.03915 | 0.516669 | 0.6706 |
| 13 | 93 | 6 | 0.55063 | 0.03957 | 0.478286 | 0.6339 |
| 14 | 87 | 5 | 0.51899 | 0.03975 | 0.446646 | 0.603 |
| 15 | 82 | 4 | 0.49367 | 0.03977 | 0.421558 | 0.5781 |
| 16 | 78 | 4 | 0.46835 | 0.0397 | 0.396667 | 0.553 |
| 17 | 74 | 2 | 0.4557 | 0.03962 | 0.384296 | 0.5404 |
| 18 | 72 | 2 | 0.44304 | 0.03952 | 0.371975 | 0.5277 |
| 19 | 70 | 2 | 0.43038 | 0.03939 | 0.359704 | 0.5149 |
| 20 | 68 | 2 | 0.41772 | 0.03924 | 0.347485 | 0.5022 |
| 21 | 66 | 1 | 0.41139 | 0.03915 | 0.341394 | 0.4957 |
| 23 | 65 | 1 | 0.40506 | 0.03905 | 0.335316 | 0.4893 |
| 24 | 64 | 2 | 0.39241 | 0.03885 | 0.323199 | 0.4764 |
| 25 | 62 | 2 | 0.37975 | 0.03861 | 0.311135 | 0.4635 |
| 26 | 60 | 3 | 0.36076 | 0.0382 | 0.29314 | 0.444 |
| 27 | 57 | 2 | 0.3481 | 0.0379 | 0.281213 | 0.4309 |
| 28 | 55 | 2 | 0.33544 | 0.03756 | 0.269342 | 0.4178 |
| 29 | 53 | 2 | 0.32278 | 0.0372 | 0.257529 | 0.4046 |
| 30 | 51 | 3 | 0.3038 | 0.03659 | 0.239923 | 0.3847 |
| 31 | 48 | 3 | 0.28481 | 0.03591 | 0.222457 | 0.3646 |
| 32 | 45 | 3 | 0.26582 | 0.03515 | 0.205141 | 0.3445 |
| 33 | 42 | 2 | 0.25316 | 0.03459 | 0.193684 | 0.3309 |
| 34 | 40 | 1 | 0.24684 | 0.0343 | 0.187983 | 0.3241 |
| 35 | 39 | 2 | 0.23418 | 0.03369 | 0.176638 | 0.3105 |
| 36 | 37 | 2 | 0.22152 | 0.03304 | 0.165373 | 0.2967 |
| 37 | 35 | 2 | 0.20886 | 0.03234 | 0.154192 | 0.2829 |
| 38 | 33 | 1 | 0.20253 | 0.03197 | 0.148634 | 0.276 |
| 39 | 32 | 1 | 0.1962 | 0.03159 | 0.1431 | 0.269 |
| 40 | 31 | 1 | 0.18987 | 0.0312 | 0.13759 | 0.262 |
| 41 | 30 | 1 | 0.18354 | 0.0308 | 0.132104 | 0.255 |
| 42 | 29 | 1 | 0.17722 | 0.03038 | 0.126645 | 0.248 |
| 43 | 28 | 1 | 0.17089 | 0.02995 | 0.121212 | 0.2409 |
| 44 | 27 | 1 | 0.16456 | 0.0295 | 0.115807 | 0.2338 |
| 45 | 26 | 1 | 0.15823 | 0.02903 | 0.110431 | 0.2267 |
| 59 | 25 | 1 | 0.1519 | 0.02855 | 0.105086 | 0.2196 |
| 64 | 24 | 1 | 0.14557 | 0.02806 | 0.099772 | 0.2124 |
| 65 | 23 | 1 | 0.13924 | 0.02754 | 0.094492 | 0.2052 |
| 71 | 22 | 1 | 0.13291 | 0.02701 | 0.089248 | 0.1979 |
| 72 | 21 | 1 | 0.12658 | 0.02645 | 0.084041 | 0.1907 |
| 96 | 20 | 1 | 0.12025 | 0.02588 | 0.078874 | 0.1833 |
| 97 | 19 | 1 | 0.11392 | 0.02528 | 0.073749 | 0.176 |
| 98 | 18 | 1 | 0.10759 | 0.02465 | 0.06867 | 0.1686 |
| 99 | 17 | 1 | 0.10127 | 0.024 | 0.063639 | 0.1611 |
| 100 | 16 | 1 | 0.09494 | 0.02332 | 0.058661 | 0.1536 |
| 101 | 15 | 1 | 0.08861 | 0.02261 | 0.053739 | 0.1461 |
| 102 | 14 | 1 | 0.08228 | 0.02186 | 0.048879 | 0.1385 |
| 103 | 13 | 1 | 0.07595 | 0.02108 | 0.044088 | 0.1308 |
| 104 | 12 | 1 | 0.06962 | 0.02025 | 0.039372 | 0.1231 |
| 116 | 11 | 1 | 0.06329 | 0.01937 | 0.03474 | 0.1153 |
| 117 | 10 | 1 | 0.05696 | 0.01844 | 0.030203 | 0.1074 |
| 118 | 9 | 1 | 0.05063 | 0.01744 | 0.025775 | 0.0995 |
| 145 | 8 | 1 | 0.0443 | 0.01637 | 0.021475 | 0.0914 |
| 146 | 7 | 1 | 0.03797 | 0.01521 | 0.017324 | 0.0832 |
| 147 | 6 | 1 | 0.03165 | 0.01393 | 0.013357 | 0.075 |
| 148 | 5 | 1 | 0.02532 | 0.0125 | 0.009621 | 0.0666 |
| 149 | 4 | 1 | 0.01899 | 0.01086 | 0.00619 | 0.0582 |
| 150 | 3 | 1 | 0.01266 | 0.00889 | 0.003194 | 0.0502 |
| 151 | 2 | 1 | 0.00633 | 0.00631 | 0.000897 | 0.0447 |
| 152 | 1 | 1 | 0 | NaN | NA | NA |

**Table S141.** Manisa station Kaplan-Meier drought risk estimates according to SPI-3, 6, and 12

| Drought Risk (SPI3) | | Drought Risk (SPI6) | | Drought Risk (SPI12) | |
| --- | --- | --- | --- | --- | --- |
| Time | Drought Risk | Time | Drought Risk | Time | Drought Risk |
| 1 | 0.0473 | 1 | 0.04516 | 1 | 0.03797 |
| 2 | 0.10811 | 2 | 0.10323 | 2 | 0.08228 |
| 3 | 0.19595 | 3 | 0.16129 | 3 | 0.12658 |
| 4 | 0.27027 | 4 | 0.20645 | 4 | 0.17089 |
| 5 | 0.33108 | 5 | 0.25161 | 5 | 0.20886 |
| 6 | 0.35135 | 6 | 0.31613 | 6 | 0.24051 |
| 7 | 0.39865 | 7 | 0.36129 | 7 | 0.26582 |
| 8 | 0.4527 | 8 | 0.4 | 8 | 0.29114 |
| 9 | 0.50676 | 9 | 0.43871 | 9 | 0.31013 |
| 10 | 0.57432 | 10 | 0.49677 | 10 | 0.33544 |
| 11 | 0.62838 | 11 | 0.52903 | 11 | 0.36709 |
| 12 | 0.64189 | 12 | 0.54194 | 12 | 0.41139 |
| 13 | 0.66216 | 13 | 0.56129 | 13 | 0.44937 |
| 14 | 0.67568 | 14 | 0.56774 | 14 | 0.48101 |
| 15 | 0.72297 | 15 | 0.57419 | 15 | 0.50633 |
| 16 | 0.77703 | 16 | 0.59355 | 16 | 0.53165 |
| 17 | 0.80405 | 17 | 0.6129 | 17 | 0.5443 |
| 18 | 0.83784 | 19 | 0.61935 | 18 | 0.55696 |
| 19 | 0.85811 | 20 | 0.63226 | 19 | 0.56962 |
| 21 | 0.86486 | 21 | 0.63871 | 20 | 0.58228 |
| 22 | 0.87838 | 22 | 0.65161 | 21 | 0.58861 |
| 23 | 0.89189 | 23 | 0.66452 | 23 | 0.59494 |
| 24 | 0.90541 | 24 | 0.68387 | 24 | 0.60759 |
| 25 | 0.91892 | 25 | 0.70968 | 25 | 0.62025 |
| 26 | 0.9527 | 26 | 0.72258 | 26 | 0.63924 |
| 27 | 0.96622 | 27 | 0.73548 | 27 | 0.6519 |
| 28 | 0.97973 | 28 | 0.74839 | 28 | 0.66456 |
| 29 | 0.98649 | 29 | 0.77419 | 29 | 0.67722 |
| 30 | 0.99324 | 30 | 0.8 | 30 | 0.6962 |
| 37 | 1 | 31 | 0.8129 | 31 | 0.71519 |
|  |  | 32 | 0.82581 | 32 | 0.73418 |
|  |  | 33 | 0.83871 | 33 | 0.74684 |
|  |  | 34 | 0.85161 | 34 | 0.75316 |
|  |  | 35 | 0.87097 | 35 | 0.76582 |
|  |  | 36 | 0.88387 | 36 | 0.77848 |
|  |  | 37 | 0.90968 | 37 | 0.79114 |
|  |  | 38 | 0.92903 | 38 | 0.79747 |
|  |  | 39 | 0.94839 | 39 | 0.8038 |
|  |  | 40 | 0.96774 | 40 | 0.81013 |
|  |  | 41 | 0.9871 | 41 | 0.81646 |
|  |  | 42 | 0.99355 | 42 | 0.82278 |
|  |  | 52 | 1 | 43 | 0.82911 |
|  |  |  |  | 44 | 0.83544 |
|  |  |  |  | 45 | 0.84177 |
|  |  |  |  | 59 | 0.8481 |
|  |  |  |  | 64 | 0.85443 |
|  |  |  |  | 65 | 0.86076 |
|  |  |  |  | 71 | 0.86709 |
|  |  |  |  | 72 | 0.87342 |
|  |  |  |  | 96 | 0.87975 |
|  |  |  |  | 97 | 0.88608 |
|  |  |  |  | 98 | 0.89241 |
|  |  |  |  | 99 | 0.89873 |
|  |  |  |  | 100 | 0.90506 |
|  |  |  |  | 101 | 0.91139 |
|  |  |  |  | 102 | 0.91772 |
|  |  |  |  | 103 | 0.92405 |
|  |  |  |  | 104 | 0.93038 |
|  |  |  |  | 116 | 0.93671 |
|  |  |  |  | 117 | 0.94304 |
|  |  |  |  | 118 | 0.94937 |
|  |  |  |  | 145 | 0.9557 |
|  |  |  |  | 146 | 0.96203 |
|  |  |  |  | 147 | 0.96835 |
|  |  |  |  | 148 | 0.97468 |
|  |  |  |  | 149 | 0.98101 |
|  |  |  |  | 150 | 0.98734 |
|  |  |  |  | 151 | 0.99367 |
|  |  |  |  | 152 | 1 |

**Table S142.** Manisa station Kaplan-Meier survival estimates according to SPEI-3

| Kaplan-Meier Wet to Dry (SPEI3) | | | | | | |
| --- | --- | --- | --- | --- | --- | --- |
|  |  | n | events | median | 0.95LCL | 0.95UCL |
|  |  | 178 | 178 | 8 | 7 | 10 |
| time | n.risk | n.event | survival | std.err | lower 95% CI | upper 95% CI |
| 1 | 178 | 11 | 0.9382 | 0.01805 | 0.903488 | 0.9743 |
| 2 | 167 | 11 | 0.8764 | 0.02467 | 0.829365 | 0.9261 |
| 3 | 156 | 17 | 0.7809 | 0.031 | 0.722437 | 0.8441 |
| 4 | 139 | 16 | 0.69101 | 0.03463 | 0.626357 | 0.7623 |
| 5 | 123 | 14 | 0.61236 | 0.03652 | 0.54481 | 0.6883 |
| 6 | 109 | 7 | 0.57303 | 0.03707 | 0.504787 | 0.6505 |
| 7 | 102 | 12 | 0.50562 | 0.03747 | 0.437255 | 0.5847 |
| 8 | 90 | 9 | 0.45506 | 0.03732 | 0.387478 | 0.5344 |
| 9 | 81 | 6 | 0.42135 | 0.03701 | 0.354711 | 0.5005 |
| 10 | 75 | 7 | 0.38202 | 0.03642 | 0.316915 | 0.4605 |
| 11 | 68 | 5 | 0.35393 | 0.03584 | 0.290216 | 0.4316 |
| 12 | 63 | 6 | 0.32022 | 0.03497 | 0.258523 | 0.3967 |
| 13 | 57 | 5 | 0.29213 | 0.03408 | 0.232418 | 0.3672 |
| 14 | 52 | 2 | 0.2809 | 0.03369 | 0.22206 | 0.3553 |
| 15 | 50 | 1 | 0.27528 | 0.03348 | 0.216899 | 0.3494 |
| 16 | 49 | 6 | 0.24157 | 0.03208 | 0.18621 | 0.3134 |
| 17 | 43 | 5 | 0.21348 | 0.03071 | 0.161029 | 0.283 |
| 18 | 38 | 7 | 0.17416 | 0.02843 | 0.126477 | 0.2398 |
| 19 | 31 | 4 | 0.15169 | 0.02689 | 0.107168 | 0.2147 |
| 20 | 27 | 2 | 0.14045 | 0.02604 | 0.097653 | 0.202 |
| 21 | 25 | 3 | 0.1236 | 0.02467 | 0.083582 | 0.1828 |
| 22 | 22 | 4 | 0.10112 | 0.0226 | 0.065258 | 0.1567 |
| 23 | 18 | 4 | 0.07865 | 0.02018 | 0.047571 | 0.13 |
| 24 | 14 | 3 | 0.0618 | 0.01805 | 0.034864 | 0.1095 |
| 25 | 11 | 2 | 0.05056 | 0.01642 | 0.026752 | 0.0956 |
| 26 | 9 | 3 | 0.03371 | 0.01353 | 0.015351 | 0.074 |
| 27 | 6 | 2 | 0.02247 | 0.01111 | 0.008528 | 0.0592 |
| 28 | 4 | 1 | 0.01685 | 0.00965 | 0.005488 | 0.0518 |
| 30 | 3 | 1 | 0.01124 | 0.0079 | 0.002832 | 0.0446 |
| 33 | 2 | 1 | 0.00562 | 0.0056 | 0.000796 | 0.0397 |
| 49 | 1 | 1 | 0 | NaN | NA | NA |

**Table S143.** Manisa station Kaplan-Meier survival estimates according to SPEI-6

| Kaplan-Meier Wet to Dry (SPEI6) | | | | | | |
| --- | --- | --- | --- | --- | --- | --- |
|  |  | n | events | median | 0.95LCL | 0.95UCL |
|  |  | 178 | 178 | 15.5 | 13 | 20 |
| time | n.risk | n.event | survival | std.err | lower 95% CI | upper 95% CI |
| 1 | 178 | 8 | 0.95506 | 0.01553 | 0.9251 | 0.986 |
| 2 | 170 | 14 | 0.8764 | 0.02467 | 0.829365 | 0.9261 |
| 3 | 156 | 12 | 0.80899 | 0.02946 | 0.753253 | 0.8688 |
| 4 | 144 | 7 | 0.76966 | 0.03156 | 0.710229 | 0.8341 |
| 5 | 137 | 4 | 0.74719 | 0.03258 | 0.685994 | 0.8138 |
| 6 | 133 | 6 | 0.71348 | 0.03389 | 0.65006 | 0.7831 |
| 7 | 127 | 3 | 0.69663 | 0.03446 | 0.632265 | 0.7675 |
| 8 | 124 | 2 | 0.68539 | 0.03481 | 0.620461 | 0.7571 |
| 9 | 122 | 2 | 0.67416 | 0.03513 | 0.608704 | 0.7466 |
| 10 | 120 | 5 | 0.64607 | 0.03584 | 0.579503 | 0.7203 |
| 11 | 115 | 6 | 0.61236 | 0.03652 | 0.54481 | 0.6883 |
| 12 | 109 | 6 | 0.57865 | 0.03701 | 0.510476 | 0.6559 |
| 13 | 103 | 4 | 0.55618 | 0.03724 | 0.487778 | 0.6342 |
| 14 | 99 | 5 | 0.52809 | 0.03742 | 0.459618 | 0.6068 |
| 15 | 94 | 5 | 0.5 | 0.03748 | 0.431688 | 0.5791 |
| 16 | 89 | 4 | 0.47753 | 0.03744 | 0.409509 | 0.5568 |
| 17 | 85 | 3 | 0.46067 | 0.03736 | 0.392972 | 0.54 |
| 18 | 82 | 3 | 0.44382 | 0.03724 | 0.376518 | 0.5232 |
| 19 | 79 | 2 | 0.43258 | 0.03713 | 0.365596 | 0.5118 |
| 20 | 77 | 3 | 0.41573 | 0.03694 | 0.349282 | 0.4948 |
| 21 | 74 | 5 | 0.38764 | 0.03652 | 0.322286 | 0.4662 |
| 22 | 69 | 1 | 0.38202 | 0.03642 | 0.316915 | 0.4605 |
| 23 | 68 | 3 | 0.36517 | 0.03609 | 0.300865 | 0.4432 |
| 24 | 65 | 3 | 0.34831 | 0.03571 | 0.284907 | 0.4258 |
| 25 | 62 | 3 | 0.33146 | 0.03528 | 0.269044 | 0.4084 |
| 26 | 59 | 2 | 0.32022 | 0.03497 | 0.258523 | 0.3967 |
| 27 | 57 | 3 | 0.30337 | 0.03446 | 0.242825 | 0.379 |
| 28 | 54 | 3 | 0.28652 | 0.03389 | 0.227233 | 0.3613 |
| 29 | 51 | 3 | 0.26966 | 0.03326 | 0.211751 | 0.3434 |
| 30 | 48 | 4 | 0.24719 | 0.03233 | 0.19129 | 0.3194 |
| 31 | 44 | 2 | 0.23596 | 0.03182 | 0.181143 | 0.3074 |
| 32 | 42 | 3 | 0.2191 | 0.031 | 0.166034 | 0.2891 |
| 33 | 39 | 2 | 0.20787 | 0.03041 | 0.15604 | 0.2769 |
| 34 | 37 | 1 | 0.20225 | 0.03011 | 0.151068 | 0.2708 |
| 35 | 36 | 2 | 0.19101 | 0.02946 | 0.141175 | 0.2584 |
| 37 | 34 | 1 | 0.18539 | 0.02913 | 0.136257 | 0.2522 |
| 38 | 33 | 1 | 0.17978 | 0.02878 | 0.131357 | 0.246 |
| 39 | 32 | 1 | 0.17416 | 0.02843 | 0.126477 | 0.2398 |
| 40 | 31 | 1 | 0.16854 | 0.02806 | 0.121617 | 0.2336 |
| 41 | 30 | 2 | 0.1573 | 0.02729 | 0.111962 | 0.221 |
| 42 | 28 | 2 | 0.14607 | 0.02647 | 0.102398 | 0.2084 |
| 47 | 26 | 1 | 0.14045 | 0.02604 | 0.097653 | 0.202 |
| 48 | 25 | 2 | 0.12921 | 0.02514 | 0.088244 | 0.1892 |
| 49 | 23 | 2 | 0.11798 | 0.02418 | 0.07895 | 0.1763 |
| 50 | 21 | 2 | 0.10674 | 0.02314 | 0.069786 | 0.1633 |
| 51 | 19 | 3 | 0.08989 | 0.02144 | 0.056323 | 0.1435 |
| 52 | 16 | 3 | 0.07303 | 0.0195 | 0.043274 | 0.1233 |
| 53 | 13 | 3 | 0.05618 | 0.01726 | 0.030766 | 0.1026 |
| 54 | 10 | 3 | 0.03933 | 0.01457 | 0.019026 | 0.0813 |
| 55 | 7 | 1 | 0.03371 | 0.01353 | 0.015351 | 0.074 |
| 56 | 6 | 1 | 0.02809 | 0.01238 | 0.011838 | 0.0667 |
| 57 | 5 | 1 | 0.02247 | 0.01111 | 0.008528 | 0.0592 |
| 58 | 4 | 1 | 0.01685 | 0.00965 | 0.005488 | 0.0518 |
| 63 | 3 | 1 | 0.01124 | 0.0079 | 0.002832 | 0.0446 |
| 64 | 2 | 1 | 0.00562 | 0.0056 | 0.000796 | 0.0397 |
| 65 | 1 | 1 | 0 | NaN | NA | NA |

**Table S144.** Manisa station Kaplan-Meier survival estimates according to SPEI-12

| Kaplan-Meier Wet to Dry (SPEI12) | | | | | | |
| --- | --- | --- | --- | --- | --- | --- |
|  |  | n | events | median | 0.95LCL | 0.95UCL |
|  |  | 170 | 170 | 19 | 17 | 23 |
| time | n.risk | n.event | survival | std.err | lower 95% CI | upper 95% CI |
| 1 | 170 | 7 | 0.95882 | 0.01524 | 0.929415 | 0.9892 |
| 2 | 163 | 5 | 0.92941 | 0.01964 | 0.891695 | 0.9687 |
| 3 | 158 | 6 | 0.89412 | 0.0236 | 0.849041 | 0.9416 |
| 4 | 152 | 4 | 0.87059 | 0.02574 | 0.821566 | 0.9225 |
| 5 | 148 | 4 | 0.84706 | 0.02761 | 0.794645 | 0.9029 |
| 6 | 144 | 2 | 0.83529 | 0.02845 | 0.781358 | 0.893 |
| 7 | 142 | 3 | 0.81765 | 0.02962 | 0.761615 | 0.8778 |
| 8 | 139 | 3 | 0.8 | 0.03068 | 0.742075 | 0.8624 |
| 9 | 136 | 3 | 0.78235 | 0.03165 | 0.722718 | 0.8469 |
| 10 | 133 | 3 | 0.76471 | 0.03253 | 0.703528 | 0.8312 |
| 11 | 130 | 3 | 0.74706 | 0.03334 | 0.68449 | 0.8153 |
| 12 | 127 | 7 | 0.70588 | 0.03495 | 0.640607 | 0.7778 |
| 13 | 120 | 6 | 0.67059 | 0.03605 | 0.603531 | 0.7451 |
| 14 | 114 | 6 | 0.63529 | 0.03692 | 0.566905 | 0.7119 |
| 15 | 108 | 5 | 0.60588 | 0.03748 | 0.536704 | 0.684 |
| 16 | 103 | 5 | 0.57647 | 0.0379 | 0.50678 | 0.6557 |
| 17 | 98 | 6 | 0.54118 | 0.03822 | 0.471223 | 0.6215 |
| 18 | 92 | 6 | 0.50588 | 0.03835 | 0.436043 | 0.5869 |
| 19 | 86 | 5 | 0.47647 | 0.03831 | 0.407009 | 0.5578 |
| 20 | 81 | 4 | 0.45294 | 0.03818 | 0.383968 | 0.5343 |
| 21 | 77 | 3 | 0.43529 | 0.03803 | 0.366796 | 0.5166 |
| 22 | 74 | 2 | 0.42353 | 0.0379 | 0.355401 | 0.5047 |
| 23 | 72 | 3 | 0.40588 | 0.03766 | 0.338388 | 0.4868 |
| 24 | 69 | 4 | 0.38235 | 0.03727 | 0.315856 | 0.4628 |
| 25 | 65 | 3 | 0.36471 | 0.03692 | 0.299074 | 0.4447 |
| 26 | 62 | 3 | 0.34706 | 0.03651 | 0.282395 | 0.4265 |
| 27 | 59 | 4 | 0.32353 | 0.03588 | 0.260323 | 0.4021 |
| 28 | 55 | 4 | 0.3 | 0.03515 | 0.23845 | 0.3774 |
| 29 | 51 | 3 | 0.28235 | 0.03452 | 0.222184 | 0.3588 |
| 30 | 48 | 3 | 0.26471 | 0.03384 | 0.206042 | 0.3401 |
| 31 | 45 | 3 | 0.24706 | 0.03308 | 0.190034 | 0.3212 |
| 32 | 42 | 2 | 0.23529 | 0.03253 | 0.17944 | 0.3085 |
| 33 | 40 | 2 | 0.22353 | 0.03195 | 0.168911 | 0.2958 |
| 34 | 38 | 1 | 0.21765 | 0.03165 | 0.163673 | 0.2894 |
| 35 | 37 | 1 | 0.21176 | 0.03134 | 0.158453 | 0.283 |
| 36 | 36 | 1 | 0.20588 | 0.03101 | 0.153251 | 0.2766 |
| 37 | 35 | 1 | 0.2 | 0.03068 | 0.148068 | 0.2701 |
| 38 | 34 | 1 | 0.19412 | 0.03033 | 0.142905 | 0.2637 |
| 39 | 33 | 1 | 0.18824 | 0.02998 | 0.137762 | 0.2572 |
| 40 | 32 | 1 | 0.18235 | 0.02962 | 0.132639 | 0.2507 |
| 41 | 31 | 1 | 0.17647 | 0.02924 | 0.127539 | 0.2442 |
| 42 | 30 | 1 | 0.17059 | 0.02885 | 0.122461 | 0.2376 |
| 43 | 29 | 1 | 0.16471 | 0.02845 | 0.117406 | 0.2311 |
| 44 | 28 | 1 | 0.15882 | 0.02803 | 0.112376 | 0.2245 |
| 45 | 27 | 1 | 0.15294 | 0.02761 | 0.107371 | 0.2179 |
| 46 | 26 | 1 | 0.14706 | 0.02716 | 0.102392 | 0.2112 |
| 64 | 25 | 1 | 0.14118 | 0.02671 | 0.097441 | 0.2045 |
| 70 | 24 | 1 | 0.13529 | 0.02623 | 0.09252 | 0.1978 |
| 71 | 23 | 1 | 0.12941 | 0.02574 | 0.087629 | 0.1911 |
| 85 | 22 | 1 | 0.12353 | 0.02524 | 0.08277 | 0.1844 |
| 92 | 21 | 1 | 0.11765 | 0.02471 | 0.077946 | 0.1776 |
| 93 | 20 | 1 | 0.11176 | 0.02417 | 0.073158 | 0.1707 |
| 94 | 19 | 1 | 0.10588 | 0.0236 | 0.068409 | 0.1639 |
| 95 | 18 | 1 | 0.1 | 0.02301 | 0.063701 | 0.157 |
| 96 | 17 | 2 | 0.08824 | 0.02175 | 0.054423 | 0.1431 |
| 97 | 15 | 2 | 0.07647 | 0.02038 | 0.045354 | 0.1289 |
| 98 | 13 | 1 | 0.07059 | 0.01964 | 0.040911 | 0.1218 |
| 99 | 12 | 1 | 0.06471 | 0.01887 | 0.036538 | 0.1146 |
| 100 | 11 | 1 | 0.05882 | 0.01805 | 0.032241 | 0.1073 |
| 101 | 10 | 1 | 0.05294 | 0.01717 | 0.028033 | 0.1 |
| 102 | 9 | 1 | 0.04706 | 0.01624 | 0.023926 | 0.0926 |
| 145 | 8 | 1 | 0.04118 | 0.01524 | 0.019935 | 0.0851 |
| 146 | 7 | 1 | 0.03529 | 0.01415 | 0.016084 | 0.0774 |
| 147 | 6 | 1 | 0.02941 | 0.01296 | 0.012402 | 0.0698 |
| 148 | 5 | 1 | 0.02353 | 0.01163 | 0.008934 | 0.062 |
| 149 | 4 | 1 | 0.01765 | 0.0101 | 0.005749 | 0.0542 |
| 150 | 3 | 1 | 0.01176 | 0.00827 | 0.002966 | 0.0467 |
| 151 | 2 | 1 | 0.00588 | 0.00587 | 0.000833 | 0.0415 |
| 152 | 1 | 1 | 0 | NaN | NA | NA |

**Table S145.** Manisa station Kaplan-Meier drought risk estimates according to SPEI-3, 6, and 12

| Drought Risk (SPEI3) | | Drought Risk (SPEI6) | | Drought Risk (SPEI12) | |
| --- | --- | --- | --- | --- | --- |
| Time | Drought Risk | Time | Drought Risk | Time | Drought Risk |
| 1 | 0.0618 | 1 | 0.04494 | 1 | 0.04118 |
| 2 | 0.1236 | 2 | 0.1236 | 2 | 0.07059 |
| 3 | 0.2191 | 3 | 0.19101 | 3 | 0.10588 |
| 4 | 0.30899 | 4 | 0.23034 | 4 | 0.12941 |
| 5 | 0.38764 | 5 | 0.25281 | 5 | 0.15294 |
| 6 | 0.42697 | 6 | 0.28652 | 6 | 0.16471 |
| 7 | 0.49438 | 7 | 0.30337 | 7 | 0.18235 |
| 8 | 0.54494 | 8 | 0.31461 | 8 | 0.2 |
| 9 | 0.57865 | 9 | 0.32584 | 9 | 0.21765 |
| 10 | 0.61798 | 10 | 0.35393 | 10 | 0.23529 |
| 11 | 0.64607 | 11 | 0.38764 | 11 | 0.25294 |
| 12 | 0.67978 | 12 | 0.42135 | 12 | 0.29412 |
| 13 | 0.70787 | 13 | 0.44382 | 13 | 0.32941 |
| 14 | 0.7191 | 14 | 0.47191 | 14 | 0.36471 |
| 15 | 0.72472 | 15 | 0.5 | 15 | 0.39412 |
| 16 | 0.75843 | 16 | 0.52247 | 16 | 0.42353 |
| 17 | 0.78652 | 17 | 0.53933 | 17 | 0.45882 |
| 18 | 0.82584 | 18 | 0.55618 | 18 | 0.49412 |
| 19 | 0.84831 | 19 | 0.56742 | 19 | 0.52353 |
| 20 | 0.85955 | 20 | 0.58427 | 20 | 0.54706 |
| 21 | 0.8764 | 21 | 0.61236 | 21 | 0.56471 |
| 22 | 0.89888 | 22 | 0.61798 | 22 | 0.57647 |
| 23 | 0.92135 | 23 | 0.63483 | 23 | 0.59412 |
| 24 | 0.9382 | 24 | 0.65169 | 24 | 0.61765 |
| 25 | 0.94944 | 25 | 0.66854 | 25 | 0.63529 |
| 26 | 0.96629 | 26 | 0.67978 | 26 | 0.65294 |
| 27 | 0.97753 | 27 | 0.69663 | 27 | 0.67647 |
| 28 | 0.98315 | 28 | 0.71348 | 28 | 0.7 |
| 30 | 0.98876 | 29 | 0.73034 | 29 | 0.71765 |
| 33 | 0.99438 | 30 | 0.75281 | 30 | 0.73529 |
| 49 | 1 | 31 | 0.76404 | 31 | 0.75294 |
|  |  | 32 | 0.7809 | 32 | 0.76471 |
|  |  | 33 | 0.79213 | 33 | 0.77647 |
|  |  | 34 | 0.79775 | 34 | 0.78235 |
|  |  | 35 | 0.80899 | 35 | 0.78824 |
|  |  | 37 | 0.81461 | 36 | 0.79412 |
|  |  | 38 | 0.82022 | 37 | 0.8 |
|  |  | 39 | 0.82584 | 38 | 0.80588 |
|  |  | 40 | 0.83146 | 39 | 0.81176 |
|  |  | 41 | 0.8427 | 40 | 0.81765 |
|  |  | 42 | 0.85393 | 41 | 0.82353 |
|  |  | 47 | 0.85955 | 42 | 0.82941 |
|  |  | 48 | 0.87079 | 43 | 0.83529 |
|  |  | 49 | 0.88202 | 44 | 0.84118 |
|  |  | 50 | 0.89326 | 45 | 0.84706 |
|  |  | 51 | 0.91011 | 46 | 0.85294 |
|  |  | 52 | 0.92697 | 64 | 0.85882 |
|  |  | 53 | 0.94382 | 70 | 0.86471 |
|  |  | 54 | 0.96067 | 71 | 0.87059 |
|  |  | 55 | 0.96629 | 85 | 0.87647 |
|  |  | 56 | 0.97191 | 92 | 0.88235 |
|  |  | 57 | 0.97753 | 93 | 0.88824 |
|  |  | 58 | 0.98315 | 94 | 0.89412 |
|  |  | 63 | 0.98876 | 95 | 0.9 |
|  |  | 64 | 0.99438 | 96 | 0.91176 |
|  |  | 65 | 1 | 97 | 0.92353 |
|  |  |  |  | 98 | 0.92941 |
|  |  |  |  | 99 | 0.93529 |
|  |  |  |  | 100 | 0.94118 |
|  |  |  |  | 101 | 0.94706 |
|  |  |  |  | 102 | 0.95294 |
|  |  |  |  | 145 | 0.95882 |
|  |  |  |  | 146 | 0.96471 |
|  |  |  |  | 147 | 0.97059 |
|  |  |  |  | 148 | 0.97647 |
|  |  |  |  | 149 | 0.98235 |
|  |  |  |  | 150 | 0.98824 |
|  |  |  |  | 151 | 0.99412 |
|  |  |  |  | 152 | 1 |

**Table S146.** Menemen station Kaplan-Meier survival estimates according to SPI-3

| Kaplan-Meier Wet to Dry (SPI3) | | | | | | |
| --- | --- | --- | --- | --- | --- | --- |
|  |  | n | events | median | 0.95LCL | 0.95UCL |
|  |  | 77 | 77 | 9 | 6 | 12 |
| time | n.risk | n.event | survival | std.err | lower 95% CL | upper 95% CL |
| 1 | 77 | 5 | 0.9351 | 0.0281 | 0.88162 | 0.992 |
| 2 | 72 | 6 | 0.8571 | 0.0399 | 0.78244 | 0.939 |
| 3 | 66 | 9 | 0.7403 | 0.05 | 0.64852 | 0.845 |
| 4 | 57 | 6 | 0.6623 | 0.0539 | 0.5647 | 0.777 |
| 5 | 51 | 3 | 0.6234 | 0.0552 | 0.52402 | 0.742 |
| 6 | 48 | 4 | 0.5714 | 0.0564 | 0.47093 | 0.693 |
| 7 | 44 | 3 | 0.5325 | 0.0569 | 0.43191 | 0.656 |
| 8 | 41 | 2 | 0.5065 | 0.057 | 0.40628 | 0.631 |
| 9 | 39 | 4 | 0.4545 | 0.0567 | 0.35589 | 0.581 |
| 10 | 35 | 3 | 0.4156 | 0.0562 | 0.31888 | 0.542 |
| 11 | 32 | 3 | 0.3766 | 0.0552 | 0.28256 | 0.502 |
| 12 | 29 | 2 | 0.3506 | 0.0544 | 0.25874 | 0.475 |
| 13 | 27 | 2 | 0.3247 | 0.0534 | 0.23526 | 0.448 |
| 14 | 25 | 3 | 0.2857 | 0.0515 | 0.2007 | 0.407 |
| 15 | 22 | 3 | 0.2468 | 0.0491 | 0.16702 | 0.365 |
| 16 | 19 | 2 | 0.2208 | 0.0473 | 0.14512 | 0.336 |
| 17 | 17 | 3 | 0.1818 | 0.044 | 0.1132 | 0.292 |
| 18 | 14 | 5 | 0.1169 | 0.0366 | 0.06326 | 0.216 |
| 19 | 9 | 1 | 0.1039 | 0.0348 | 0.05392 | 0.2 |
| 20 | 8 | 1 | 0.0909 | 0.0328 | 0.04486 | 0.184 |
| 21 | 7 | 1 | 0.0779 | 0.0305 | 0.03614 | 0.168 |
| 23 | 6 | 1 | 0.0649 | 0.0281 | 0.02782 | 0.152 |
| 24 | 5 | 1 | 0.0519 | 0.0253 | 0.02001 | 0.135 |
| 25 | 4 | 1 | 0.039 | 0.0221 | 0.01285 | 0.118 |
| 26 | 3 | 1 | 0.026 | 0.0181 | 0.00661 | 0.102 |
| 27 | 2 | 1 | 0.013 | 0.0129 | 0.00185 | 0.091 |
| 36 | 1 | 1 | 0 | NaN | NA | NA |

**Table S147.** Menemen station Kaplan-Meier survival estimates according to SPI-6

| Kaplan-Meier Wet to Dry (SPI6) | | | | | | |
| --- | --- | --- | --- | --- | --- | --- |
|  |  | n | events | median | 0.95LCL | 0.95UCL |
|  |  | 83 | 83 | 13 | 10 | 17 |
| time | n.risk | n.event | survival | std.err | lower 95% CL | upper 95% CL |
| 1 | 83 | 7 | 0.9157 | 0.0305 | 0.85779 | 0.9774 |
| 2 | 76 | 9 | 0.8072 | 0.0433 | 0.72667 | 0.8967 |
| 3 | 67 | 5 | 0.747 | 0.0477 | 0.65908 | 0.8466 |
| 4 | 62 | 2 | 0.7229 | 0.0491 | 0.63274 | 0.8259 |
| 5 | 60 | 1 | 0.7108 | 0.0498 | 0.6197 | 0.8154 |
| 6 | 59 | 3 | 0.6747 | 0.0514 | 0.58108 | 0.7834 |
| 7 | 56 | 2 | 0.6506 | 0.0523 | 0.55571 | 0.7617 |
| 8 | 54 | 2 | 0.6265 | 0.0531 | 0.53062 | 0.7397 |
| 9 | 52 | 2 | 0.6024 | 0.0537 | 0.50581 | 0.7175 |
| 10 | 50 | 2 | 0.5783 | 0.0542 | 0.48126 | 0.6949 |
| 11 | 48 | 2 | 0.5542 | 0.0546 | 0.45697 | 0.6722 |
| 12 | 46 | 2 | 0.5301 | 0.0548 | 0.43292 | 0.6491 |
| 13 | 44 | 4 | 0.4819 | 0.0548 | 0.38558 | 0.6024 |
| 14 | 40 | 3 | 0.4458 | 0.0546 | 0.35071 | 0.5666 |
| 15 | 37 | 2 | 0.4217 | 0.0542 | 0.32777 | 0.5425 |
| 16 | 35 | 2 | 0.3976 | 0.0537 | 0.30509 | 0.5181 |
| 17 | 33 | 2 | 0.3735 | 0.0531 | 0.28267 | 0.4935 |
| 18 | 31 | 4 | 0.3253 | 0.0514 | 0.23863 | 0.4434 |
| 19 | 27 | 3 | 0.2892 | 0.0498 | 0.20637 | 0.4052 |
| 20 | 24 | 1 | 0.2771 | 0.0491 | 0.19577 | 0.3922 |
| 21 | 23 | 1 | 0.2651 | 0.0484 | 0.18525 | 0.3792 |
| 22 | 22 | 2 | 0.241 | 0.0469 | 0.16449 | 0.353 |
| 23 | 20 | 2 | 0.2169 | 0.0452 | 0.14409 | 0.3264 |
| 24 | 18 | 2 | 0.1928 | 0.0433 | 0.12412 | 0.2994 |
| 26 | 16 | 1 | 0.1807 | 0.0422 | 0.11431 | 0.2857 |
| 27 | 15 | 1 | 0.1687 | 0.0411 | 0.10462 | 0.2719 |
| 37 | 14 | 1 | 0.1566 | 0.0399 | 0.09507 | 0.258 |
| 38 | 13 | 1 | 0.1446 | 0.0386 | 0.08567 | 0.244 |
| 39 | 12 | 2 | 0.1205 | 0.0357 | 0.06737 | 0.2155 |
| 40 | 10 | 1 | 0.1084 | 0.0341 | 0.05851 | 0.2009 |
| 41 | 9 | 1 | 0.0964 | 0.0324 | 0.04988 | 0.1862 |
| 42 | 8 | 1 | 0.0843 | 0.0305 | 0.04151 | 0.1713 |
| 43 | 7 | 1 | 0.0723 | 0.0284 | 0.03345 | 0.1562 |
| 44 | 6 | 1 | 0.0602 | 0.0261 | 0.02576 | 0.1409 |
| 45 | 5 | 1 | 0.0482 | 0.0235 | 0.01853 | 0.1254 |
| 46 | 4 | 1 | 0.0361 | 0.0205 | 0.0119 | 0.1098 |
| 52 | 3 | 1 | 0.0241 | 0.0168 | 0.00613 | 0.0947 |
| 53 | 2 | 1 | 0.012 | 0.012 | 0.00172 | 0.0845 |
| 54 | 1 | 1 | 0 | NaN | NA | NA |

**Table S148.** Menemen station Kaplan-Meier survival estimates according to SPI-12

| Kaplan-Meier Wet to Dry (SPI12) | | | | | | |
| --- | --- | --- | --- | --- | --- | --- |
|  |  | n | events | median | 0.95LCL | 0.95UCL |
|  |  | 92 | 92 | 17.5 | 16 | 20 |
| time | n.risk | n.event | survival | std.err | lower 95% CL | upper 95% CL |
| 1 | 92 | 7 | 0.9239 | 0.0276 | 0.87129 | 0.9797 |
| 2 | 85 | 6 | 0.8587 | 0.0363 | 0.79039 | 0.9329 |
| 3 | 79 | 2 | 0.837 | 0.0385 | 0.76478 | 0.9159 |
| 4 | 77 | 2 | 0.8152 | 0.0405 | 0.73964 | 0.8985 |
| 5 | 75 | 1 | 0.8043 | 0.0414 | 0.72724 | 0.8896 |
| 6 | 74 | 1 | 0.7935 | 0.0422 | 0.71493 | 0.8807 |
| 7 | 73 | 1 | 0.7826 | 0.043 | 0.7027 | 0.8716 |
| 8 | 72 | 3 | 0.75 | 0.0451 | 0.66654 | 0.8439 |
| 9 | 69 | 3 | 0.7174 | 0.0469 | 0.63104 | 0.8156 |
| 10 | 66 | 1 | 0.7065 | 0.0475 | 0.61934 | 0.806 |
| 11 | 65 | 1 | 0.6957 | 0.048 | 0.60771 | 0.7963 |
| 12 | 64 | 1 | 0.6848 | 0.0484 | 0.59613 | 0.7866 |
| 13 | 63 | 2 | 0.663 | 0.0493 | 0.57316 | 0.767 |
| 14 | 61 | 2 | 0.6413 | 0.05 | 0.55042 | 0.7472 |
| 15 | 59 | 3 | 0.6087 | 0.0509 | 0.51671 | 0.7171 |
| 16 | 56 | 5 | 0.5543 | 0.0518 | 0.46154 | 0.6658 |
| 17 | 51 | 5 | 0.5 | 0.0521 | 0.40759 | 0.6134 |
| 18 | 46 | 5 | 0.4457 | 0.0518 | 0.35483 | 0.5597 |
| 19 | 41 | 4 | 0.4022 | 0.0511 | 0.31348 | 0.516 |
| 20 | 37 | 4 | 0.3587 | 0.05 | 0.27294 | 0.4714 |
| 21 | 33 | 4 | 0.3152 | 0.0484 | 0.23324 | 0.426 |
| 22 | 29 | 5 | 0.2609 | 0.0458 | 0.18495 | 0.368 |
| 23 | 24 | 3 | 0.2283 | 0.0438 | 0.15677 | 0.3324 |
| 24 | 21 | 3 | 0.1957 | 0.0414 | 0.12929 | 0.2961 |
| 25 | 18 | 1 | 0.1848 | 0.0405 | 0.1203 | 0.2838 |
| 26 | 17 | 1 | 0.1739 | 0.0395 | 0.11141 | 0.2715 |
| 27 | 16 | 1 | 0.163 | 0.0385 | 0.10262 | 0.259 |
| 36 | 15 | 1 | 0.1522 | 0.0374 | 0.09394 | 0.2465 |
| 38 | 14 | 1 | 0.1413 | 0.0363 | 0.08539 | 0.2338 |
| 39 | 13 | 1 | 0.1304 | 0.0351 | 0.07696 | 0.2211 |
| 40 | 12 | 1 | 0.1196 | 0.0338 | 0.06867 | 0.2082 |
| 41 | 11 | 1 | 0.1087 | 0.0325 | 0.06055 | 0.1951 |
| 42 | 10 | 2 | 0.087 | 0.0294 | 0.04485 | 0.1686 |
| 43 | 8 | 1 | 0.0761 | 0.0276 | 0.03733 | 0.1551 |
| 44 | 7 | 1 | 0.0652 | 0.0257 | 0.03009 | 0.1414 |
| 45 | 6 | 1 | 0.0543 | 0.0236 | 0.02317 | 0.1275 |
| 46 | 5 | 1 | 0.0435 | 0.0213 | 0.01667 | 0.1134 |
| 47 | 4 | 1 | 0.0326 | 0.0185 | 0.01071 | 0.0992 |
| 54 | 3 | 1 | 0.0217 | 0.0152 | 0.00552 | 0.0856 |
| 59 | 2 | 1 | 0.0109 | 0.0108 | 0.00155 | 0.0763 |
| 60 | 1 | 1 | 0 | NaN | NA | NA |

**Table S149.** Menemen station Kaplan-Meier drought risk estimates according to SPI-3, 6, and 12

| Drought Risk (SPI3) | | Drought Risk (SPI6) | | Drought Risk (SPI12) | |
| --- | --- | --- | --- | --- | --- |
| Time | Drought Risk | Time | Drought Risk | Time | Drought Risk |
| 1 | 0.0649 | 1 | 0.0843 | 1 | 0.0761 |
| 2 | 0.1429 | 2 | 0.1928 | 2 | 0.1413 |
| 3 | 0.2597 | 3 | 0.253 | 3 | 0.163 |
| 4 | 0.3377 | 4 | 0.2771 | 4 | 0.1848 |
| 5 | 0.3766 | 5 | 0.2892 | 5 | 0.1957 |
| 6 | 0.4286 | 6 | 0.3253 | 6 | 0.2065 |
| 7 | 0.4675 | 7 | 0.3494 | 7 | 0.2174 |
| 8 | 0.4935 | 8 | 0.3735 | 8 | 0.25 |
| 9 | 0.5455 | 9 | 0.3976 | 9 | 0.2826 |
| 10 | 0.5844 | 10 | 0.4217 | 10 | 0.2935 |
| 11 | 0.6234 | 11 | 0.4458 | 11 | 0.3043 |
| 12 | 0.6494 | 12 | 0.4699 | 12 | 0.3152 |
| 13 | 0.6753 | 13 | 0.5181 | 13 | 0.337 |
| 14 | 0.7143 | 14 | 0.5542 | 14 | 0.3587 |
| 15 | 0.7532 | 15 | 0.5783 | 15 | 0.3913 |
| 16 | 0.7792 | 16 | 0.6024 | 16 | 0.4457 |
| 17 | 0.8182 | 17 | 0.6265 | 17 | 0.5 |
| 18 | 0.8831 | 18 | 0.6747 | 18 | 0.5543 |
| 19 | 0.8961 | 19 | 0.7108 | 19 | 0.5978 |
| 20 | 0.9091 | 20 | 0.7229 | 20 | 0.6413 |
| 21 | 0.9221 | 21 | 0.7349 | 21 | 0.6848 |
| 23 | 0.9351 | 22 | 0.759 | 22 | 0.7391 |
| 24 | 0.9481 | 23 | 0.7831 | 23 | 0.7717 |
| 25 | 0.961 | 24 | 0.8072 | 24 | 0.8043 |
| 26 | 0.974 | 26 | 0.8193 | 25 | 0.8152 |
| 27 | 0.987 | 27 | 0.8313 | 26 | 0.8261 |
| 36 | 1 | 37 | 0.8434 | 27 | 0.837 |
|  |  | 38 | 0.8554 | 36 | 0.8478 |
|  |  | 39 | 0.8795 | 38 | 0.8587 |
|  |  | 40 | 0.8916 | 39 | 0.8696 |
|  |  | 41 | 0.9036 | 40 | 0.8804 |
|  |  | 42 | 0.9157 | 41 | 0.8913 |
|  |  | 43 | 0.9277 | 42 | 0.913 |
|  |  | 44 | 0.9398 | 43 | 0.9239 |
|  |  | 45 | 0.9518 | 44 | 0.9348 |
|  |  | 46 | 0.9639 | 45 | 0.9457 |
|  |  | 52 | 0.9759 | 46 | 0.9565 |
|  |  | 53 | 0.988 | 47 | 0.9674 |
|  |  | 54 | 1 | 54 | 0.9783 |
|  |  |  |  | 59 | 0.9891 |
|  |  |  |  | 60 | 1 |

**Table S150.** Menemen station Kaplan-Meier survival estimates according to SPEI-3

| Kaplan-Meier Wet to Dry (SPEI3) | | | | | | | |
| --- | --- | --- | --- | --- | --- | --- | --- |
|  |  | n | events | median | 0.95LCL | 0.95UCL |
|  |  | 93 | 93 | 7 | 5 | 9 |
| time | n.risk | n.event | survival | std.err | lower 95% CI | upper 95% CI |
| 1 | 93 | 6 | 0.9355 | 0.0255 | 0.88686 | 0.9868 |
| 2 | 87 | 6 | 0.871 | 0.0348 | 0.80543 | 0.9418 |
| 3 | 81 | 11 | 0.7527 | 0.0447 | 0.66992 | 0.8457 |
| 4 | 70 | 6 | 0.6882 | 0.048 | 0.60018 | 0.7891 |
| 5 | 64 | 9 | 0.5914 | 0.051 | 0.49947 | 0.7002 |
| 6 | 55 | 7 | 0.5161 | 0.0518 | 0.42393 | 0.6284 |
| 7 | 48 | 6 | 0.4516 | 0.0516 | 0.361 | 0.565 |
| 8 | 42 | 4 | 0.4086 | 0.051 | 0.31997 | 0.5218 |
| 9 | 38 | 5 | 0.3548 | 0.0496 | 0.26978 | 0.4667 |
| 10 | 33 | 3 | 0.3226 | 0.0485 | 0.24029 | 0.4331 |
| 11 | 30 | 3 | 0.2903 | 0.0471 | 0.21129 | 0.3989 |
| 12 | 27 | 4 | 0.2473 | 0.0447 | 0.17348 | 0.3526 |
| 13 | 23 | 4 | 0.2043 | 0.0418 | 0.1368 | 0.3051 |
| 14 | 19 | 4 | 0.1613 | 0.0381 | 0.10147 | 0.2564 |
| 15 | 15 | 3 | 0.129 | 0.0348 | 0.0761 | 0.2188 |
| 16 | 12 | 2 | 0.1075 | 0.0321 | 0.05987 | 0.1931 |
| 17 | 10 | 3 | 0.0753 | 0.0274 | 0.03692 | 0.1535 |
| 18 | 7 | 1 | 0.0645 | 0.0255 | 0.02976 | 0.1399 |
| 19 | 6 | 1 | 0.0538 | 0.0234 | 0.02292 | 0.1261 |
| 25 | 5 | 1 | 0.043 | 0.021 | 0.01649 | 0.1122 |
| 26 | 4 | 2 | 0.0215 | 0.015 | 0.00546 | 0.0847 |
| 27 | 2 | 1 | 0.0108 | 0.0107 | 0.00153 | 0.0755 |
| 37 | 1 | 1 | 0 | NaN | NA | NA |

**Table S151.** Menemen station Kaplan-Meier survival estimates according to SPEI-6

| Kaplan-Meier Wet to Dry (SPEI6) | | | | | | | |
| --- | --- | --- | --- | --- | --- | --- | --- |
|  |  | n | events | median | 0.95LCL | 0.95UCL |
|  |  | 88 | 88 | 14 | 12 | 17 |
| time | n.risk | n.event | survival | std.err | lower 95% CI | upper 95% CI |
| 1 | 88 | 5 | 0.9432 | 0.0247 | 0.89603 | 0.9928 |
| 2 | 83 | 5 | 0.8864 | 0.0338 | 0.82247 | 0.9552 |
| 3 | 78 | 6 | 0.8182 | 0.0411 | 0.74144 | 0.9029 |
| 4 | 72 | 3 | 0.7841 | 0.0439 | 0.70267 | 0.8749 |
| 6 | 69 | 1 | 0.7727 | 0.0447 | 0.68995 | 0.8654 |
| 7 | 68 | 3 | 0.7386 | 0.0468 | 0.65231 | 0.8364 |
| 8 | 65 | 3 | 0.7045 | 0.0486 | 0.61539 | 0.8066 |
| 9 | 62 | 3 | 0.6705 | 0.0501 | 0.5791 | 0.7762 |
| 10 | 59 | 3 | 0.6364 | 0.0513 | 0.54339 | 0.7452 |
| 11 | 56 | 3 | 0.6023 | 0.0522 | 0.50822 | 0.7137 |
| 12 | 53 | 3 | 0.5682 | 0.0528 | 0.47357 | 0.6817 |
| 13 | 50 | 4 | 0.5227 | 0.0532 | 0.42813 | 0.6382 |
| 14 | 46 | 3 | 0.4886 | 0.0533 | 0.3946 | 0.6051 |
| 15 | 43 | 3 | 0.4545 | 0.0531 | 0.36156 | 0.5714 |
| 16 | 40 | 4 | 0.4091 | 0.0524 | 0.31825 | 0.5259 |
| 17 | 36 | 3 | 0.375 | 0.0516 | 0.28634 | 0.4911 |
| 18 | 33 | 4 | 0.3295 | 0.0501 | 0.24462 | 0.444 |
| 19 | 29 | 5 | 0.2727 | 0.0475 | 0.19389 | 0.3836 |
| 20 | 24 | 3 | 0.2386 | 0.0454 | 0.16431 | 0.3466 |
| 21 | 21 | 2 | 0.2159 | 0.0439 | 0.145 | 0.3215 |
| 22 | 19 | 2 | 0.1932 | 0.0421 | 0.12605 | 0.2961 |
| 23 | 17 | 1 | 0.1818 | 0.0411 | 0.11672 | 0.2832 |
| 24 | 16 | 1 | 0.1705 | 0.0401 | 0.10751 | 0.2703 |
| 25 | 15 | 2 | 0.1477 | 0.0378 | 0.08944 | 0.244 |
| 26 | 13 | 1 | 0.1364 | 0.0366 | 0.0806 | 0.2307 |
| 27 | 12 | 1 | 0.125 | 0.0353 | 0.07192 | 0.2173 |
| 29 | 11 | 1 | 0.1136 | 0.0338 | 0.0634 | 0.2037 |
| 30 | 10 | 1 | 0.1023 | 0.0323 | 0.05507 | 0.1899 |
| 41 | 9 | 1 | 0.0909 | 0.0306 | 0.04695 | 0.176 |
| 42 | 8 | 1 | 0.0795 | 0.0288 | 0.03908 | 0.1619 |
| 43 | 7 | 1 | 0.0682 | 0.0269 | 0.03149 | 0.1476 |
| 44 | 6 | 1 | 0.0568 | 0.0247 | 0.02425 | 0.1331 |
| 53 | 5 | 1 | 0.0455 | 0.0222 | 0.01745 | 0.1184 |
| 54 | 4 | 1 | 0.0341 | 0.0193 | 0.01121 | 0.1037 |
| 63 | 3 | 1 | 0.0227 | 0.0159 | 0.00577 | 0.0894 |
| 64 | 2 | 1 | 0.0114 | 0.0113 | 0.00162 | 0.0798 |
| 65 | 1 | 1 | 0 | NaN | NA | NA |

**Table S152.** Menemen station Kaplan-Meier survival estimates according to SPEI-12

| Kaplan-Meier Wet to Dry (SPEI12) | | | | | | | |
| --- | --- | --- | --- | --- | --- | --- | --- |
|  |  | n | events | median | 0.95LCL | 0.95UCL |
|  |  | 96 | 96 | 15 | 13 | 17 |
| time | n.risk | n.event | survival | std.err | lower 95% CI | upper 95% CI |
| 1 | 96 | 5 | 0.9479 | 0.0227 | 0.9045 | 0.9934 |
| 2 | 91 | 6 | 0.8854 | 0.0325 | 0.82394 | 0.9515 |
| 3 | 85 | 4 | 0.8437 | 0.0371 | 0.77416 | 0.9196 |
| 4 | 81 | 3 | 0.8125 | 0.0398 | 0.73806 | 0.8945 |
| 5 | 78 | 3 | 0.7812 | 0.0422 | 0.70278 | 0.8685 |
| 6 | 75 | 1 | 0.7708 | 0.0429 | 0.69118 | 0.8597 |
| 7 | 74 | 1 | 0.7604 | 0.0436 | 0.67965 | 0.8508 |
| 8 | 73 | 1 | 0.75 | 0.0442 | 0.6682 | 0.8418 |
| 9 | 72 | 2 | 0.7292 | 0.0454 | 0.64548 | 0.8237 |
| 10 | 70 | 3 | 0.6979 | 0.0469 | 0.61185 | 0.7961 |
| 11 | 67 | 4 | 0.6562 | 0.0485 | 0.5678 | 0.7585 |
| 12 | 63 | 4 | 0.6146 | 0.0497 | 0.52455 | 0.7201 |
| 13 | 59 | 4 | 0.5729 | 0.0505 | 0.48204 | 0.6809 |
| 14 | 55 | 4 | 0.5312 | 0.0509 | 0.44024 | 0.6411 |
| 15 | 51 | 4 | 0.4896 | 0.051 | 0.39914 | 0.6005 |
| 16 | 47 | 5 | 0.4375 | 0.0506 | 0.34871 | 0.5489 |
| 17 | 42 | 5 | 0.3854 | 0.0497 | 0.29938 | 0.4962 |
| 18 | 37 | 5 | 0.3333 | 0.0481 | 0.2512 | 0.4423 |
| 19 | 32 | 4 | 0.2917 | 0.0464 | 0.21355 | 0.3984 |
| 20 | 28 | 4 | 0.25 | 0.0442 | 0.17679 | 0.3535 |
| 21 | 24 | 3 | 0.2187 | 0.0422 | 0.14989 | 0.3192 |
| 22 | 21 | 2 | 0.1979 | 0.0407 | 0.13231 | 0.2961 |
| 23 | 19 | 2 | 0.1771 | 0.039 | 0.11505 | 0.2726 |
| 24 | 17 | 1 | 0.1667 | 0.038 | 0.10656 | 0.2607 |
| 38 | 16 | 1 | 0.1562 | 0.0371 | 0.09816 | 0.2487 |
| 39 | 15 | 1 | 0.1458 | 0.036 | 0.08987 | 0.2367 |
| 40 | 14 | 1 | 0.1354 | 0.0349 | 0.08169 | 0.2245 |
| 41 | 13 | 1 | 0.125 | 0.0338 | 0.07363 | 0.2122 |
| 42 | 12 | 2 | 0.1042 | 0.0312 | 0.05794 | 0.1873 |
| 43 | 10 | 1 | 0.0938 | 0.0297 | 0.05033 | 0.1746 |
| 44 | 9 | 1 | 0.0833 | 0.0282 | 0.04292 | 0.1618 |
| 45 | 8 | 1 | 0.0729 | 0.0265 | 0.03573 | 0.1488 |
| 46 | 7 | 1 | 0.0625 | 0.0247 | 0.0288 | 0.1356 |
| 47 | 6 | 3 | 0.0313 | 0.0178 | 0.01026 | 0.0952 |
| 48 | 3 | 1 | 0.0208 | 0.0146 | 0.00529 | 0.0821 |
| 49 | 2 | 1 | 0.0104 | 0.0104 | 0.00148 | 0.0732 |
| 96 | 1 | 1 | 0 | NaN | NA | NA |

**Table S153.** Menemen station Kaplan-Meier drought risk estimates according to SPEI-3, 6, and 12

| Drought Risk (SPEI3) | | Drought Risk (SPEI6) | | Drought Risk (SPEI12) | |
| --- | --- | --- | --- | --- | --- |
| Time | Drought Risk | Time | Drought Risk | Time | Drought Risk |
| 1 | 0.0645 | 1 | 0.0568 | 1 | 0.0521 |
| 2 | 0.129 | 2 | 0.1136 | 2 | 0.1146 |
| 3 | 0.2473 | 3 | 0.1818 | 3 | 0.1563 |
| 4 | 0.3118 | 4 | 0.2159 | 4 | 0.1875 |
| 5 | 0.4086 | 6 | 0.2273 | 5 | 0.2188 |
| 6 | 0.4839 | 7 | 0.2614 | 6 | 0.2292 |
| 7 | 0.5484 | 8 | 0.2955 | 7 | 0.2396 |
| 8 | 0.5914 | 9 | 0.3295 | 8 | 0.25 |
| 9 | 0.6452 | 10 | 0.3636 | 9 | 0.2708 |
| 10 | 0.6774 | 11 | 0.3977 | 10 | 0.3021 |
| 11 | 0.7097 | 12 | 0.4318 | 11 | 0.3438 |
| 12 | 0.7527 | 13 | 0.4773 | 12 | 0.3854 |
| 13 | 0.7957 | 14 | 0.5114 | 13 | 0.4271 |
| 14 | 0.8387 | 15 | 0.5455 | 14 | 0.4688 |
| 15 | 0.871 | 16 | 0.5909 | 15 | 0.5104 |
| 16 | 0.8925 | 17 | 0.625 | 16 | 0.5625 |
| 17 | 0.9247 | 18 | 0.6705 | 17 | 0.6146 |
| 18 | 0.9355 | 19 | 0.7273 | 18 | 0.6667 |
| 19 | 0.9462 | 20 | 0.7614 | 19 | 0.7083 |
| 25 | 0.957 | 21 | 0.7841 | 20 | 0.75 |
| 26 | 0.9785 | 22 | 0.8068 | 21 | 0.7813 |
| 27 | 0.9892 | 23 | 0.8182 | 22 | 0.8021 |
| 37 | 1 | 24 | 0.8295 | 23 | 0.8229 |
|  |  | 25 | 0.8523 | 24 | 0.8333 |
|  |  | 26 | 0.8636 | 38 | 0.8438 |
|  |  | 27 | 0.875 | 39 | 0.8542 |
|  |  | 29 | 0.8864 | 40 | 0.8646 |
|  |  | 30 | 0.8977 | 41 | 0.875 |
|  |  | 41 | 0.9091 | 42 | 0.8958 |
|  |  | 42 | 0.9205 | 43 | 0.9062 |
|  |  | 43 | 0.9318 | 44 | 0.9167 |
|  |  | 44 | 0.9432 | 45 | 0.9271 |
|  |  | 53 | 0.9545 | 46 | 0.9375 |
|  |  | 54 | 0.9659 | 47 | 0.9687 |
|  |  | 63 | 0.9773 | 48 | 0.9792 |
|  |  | 64 | 0.9886 | 49 | 0.9896 |
|  |  | 65 | 1 | 96 | 1 |

**Table S154.** Odemis station Kaplan-Meier survival estimates according to SPI-3

| Kaplan-Meier Wet to Dry (SPI3) | | | | | | |
| --- | --- | --- | --- | --- | --- | --- |
|  |  | n | events | median | 0.95LCL | 0.95UCL |
|  |  | 96 | 96 | 7.5 | 6 | 9 |
| time | n.risk | n.event | survival | std.err | lower 95% CL | upper 95% CL |
| 1 | 96 | 2 | 0.9792 | 0.0146 | 0.95101 | 1 |
| 2 | 94 | 3 | 0.9479 | 0.0227 | 0.9045 | 0.9934 |
| 3 | 91 | 11 | 0.8333 | 0.038 | 0.76202 | 0.9113 |
| 4 | 80 | 8 | 0.75 | 0.0442 | 0.6682 | 0.8418 |
| 5 | 72 | 8 | 0.6667 | 0.0481 | 0.57873 | 0.768 |
| 6 | 64 | 8 | 0.5833 | 0.0503 | 0.4926 | 0.6908 |
| 7 | 56 | 8 | 0.5 | 0.051 | 0.40935 | 0.6107 |
| 8 | 48 | 8 | 0.4167 | 0.0503 | 0.32885 | 0.5279 |
| 9 | 40 | 6 | 0.3542 | 0.0488 | 0.27033 | 0.464 |
| 10 | 34 | 4 | 0.3125 | 0.0473 | 0.23227 | 0.4204 |
| 11 | 30 | 5 | 0.2604 | 0.0448 | 0.18589 | 0.3648 |
| 12 | 25 | 2 | 0.2396 | 0.0436 | 0.16776 | 0.3422 |
| 13 | 23 | 2 | 0.2187 | 0.0422 | 0.14989 | 0.3192 |
| 14 | 21 | 1 | 0.2083 | 0.0414 | 0.14106 | 0.3077 |
| 15 | 20 | 1 | 0.1979 | 0.0407 | 0.13231 | 0.2961 |
| 16 | 19 | 3 | 0.1667 | 0.038 | 0.10656 | 0.2607 |
| 17 | 16 | 1 | 0.1562 | 0.0371 | 0.09816 | 0.2487 |
| 18 | 15 | 2 | 0.1354 | 0.0349 | 0.08169 | 0.2245 |
| 20 | 13 | 1 | 0.125 | 0.0338 | 0.07363 | 0.2122 |
| 21 | 12 | 1 | 0.1146 | 0.0325 | 0.06571 | 0.1998 |
| 22 | 11 | 1 | 0.1042 | 0.0312 | 0.05794 | 0.1873 |
| 27 | 10 | 1 | 0.0937 | 0.0297 | 0.05033 | 0.1746 |
| 32 | 9 | 1 | 0.0833 | 0.0282 | 0.04292 | 0.1618 |
| 33 | 8 | 1 | 0.0729 | 0.0265 | 0.03573 | 0.1488 |
| 34 | 7 | 1 | 0.0625 | 0.0247 | 0.0288 | 0.1356 |
| 36 | 6 | 1 | 0.0521 | 0.0227 | 0.02219 | 0.1223 |
| 37 | 5 | 2 | 0.0312 | 0.0178 | 0.01026 | 0.0952 |
| 48 | 3 | 1 | 0.0208 | 0.0146 | 0.00529 | 0.0821 |
| 49 | 2 | 1 | 0.0104 | 0.0104 | 0.00148 | 0.0732 |
| 50 | 1 | 1 | 0 | NaN | NA | NA |

**Table S155.** Odemis station Kaplan-Meier survival estimates according to SPI-6

| Kaplan-Meier Wet to Dry (SPI6) | | | | | | |
| --- | --- | --- | --- | --- | --- | --- |
|  |  | n | events | median | 0.95LCL | 0.95UCL |
|  |  | 86 | 86 | 8 | 7 | 10 |
| time | n.risk | n.event | survival | std.err | lower 95% CL | upper 95% CL |
| 1 | 86 | 3 | 0.9651 | 0.0198 | 0.92711 | 1 |
| 2 | 83 | 5 | 0.907 | 0.0313 | 0.84762 | 0.9705 |
| 3 | 78 | 7 | 0.8256 | 0.0409 | 0.74915 | 0.9098 |
| 4 | 71 | 6 | 0.7558 | 0.0463 | 0.67026 | 0.8523 |
| 5 | 65 | 5 | 0.6977 | 0.0495 | 0.60706 | 0.8018 |
| 6 | 60 | 8 | 0.6047 | 0.0527 | 0.50967 | 0.7173 |
| 7 | 52 | 7 | 0.5233 | 0.0539 | 0.42766 | 0.6402 |
| 8 | 45 | 5 | 0.4651 | 0.0538 | 0.37079 | 0.5834 |
| 9 | 40 | 4 | 0.4186 | 0.0532 | 0.32631 | 0.537 |
| 10 | 36 | 5 | 0.3605 | 0.0518 | 0.27202 | 0.4777 |
| 11 | 31 | 3 | 0.3256 | 0.0505 | 0.24019 | 0.4413 |
| 12 | 28 | 1 | 0.314 | 0.05 | 0.22971 | 0.4291 |
| 13 | 27 | 1 | 0.3023 | 0.0495 | 0.2193 | 0.4168 |
| 14 | 26 | 1 | 0.2907 | 0.049 | 0.20896 | 0.4044 |
| 15 | 25 | 1 | 0.2791 | 0.0484 | 0.19869 | 0.392 |
| 16 | 24 | 1 | 0.2674 | 0.0477 | 0.1885 | 0.3794 |
| 17 | 23 | 1 | 0.2558 | 0.047 | 0.17839 | 0.3668 |
| 19 | 22 | 1 | 0.2442 | 0.0463 | 0.16836 | 0.3542 |
| 21 | 21 | 2 | 0.2209 | 0.0447 | 0.14856 | 0.3286 |
| 22 | 19 | 1 | 0.2093 | 0.0439 | 0.13879 | 0.3156 |
| 23 | 18 | 2 | 0.186 | 0.042 | 0.11957 | 0.2895 |
| 24 | 16 | 1 | 0.1744 | 0.0409 | 0.11013 | 0.2762 |
| 25 | 15 | 1 | 0.1628 | 0.0398 | 0.1008 | 0.2629 |
| 26 | 14 | 1 | 0.1512 | 0.0386 | 0.09161 | 0.2494 |
| 27 | 13 | 1 | 0.1395 | 0.0374 | 0.08256 | 0.2358 |
| 28 | 12 | 1 | 0.1279 | 0.036 | 0.07366 | 0.2221 |
| 29 | 11 | 1 | 0.1163 | 0.0346 | 0.06493 | 0.2082 |
| 30 | 10 | 1 | 0.1047 | 0.033 | 0.0564 | 0.1942 |
| 34 | 9 | 1 | 0.093 | 0.0313 | 0.04808 | 0.18 |
| 39 | 8 | 1 | 0.0814 | 0.0295 | 0.04002 | 0.1656 |
| 45 | 7 | 1 | 0.0698 | 0.0275 | 0.03225 | 0.1509 |
| 46 | 6 | 2 | 0.0465 | 0.0227 | 0.01786 | 0.1211 |
| 47 | 4 | 1 | 0.0349 | 0.0198 | 0.01148 | 0.106 |
| 48 | 3 | 1 | 0.0233 | 0.0163 | 0.00591 | 0.0915 |
| 49 | 2 | 1 | 0.0116 | 0.0116 | 0.00166 | 0.0816 |
| 133 | 1 | 1 | 0 | NaN | NA | NA |

**Table S156.** Odemis station Kaplan-Meier survival estimates according to SPI-12

| Kaplan-Meier Wet to Dry (SPI12) | | | | | | |
| --- | --- | --- | --- | --- | --- | --- |
|  |  | n | events | median | 0.95LCL | 0.95UCL |
|  |  | 80 | 80 | 17.5 | 15 | 20 |
| time | n.risk | n.event | survival | std.err | lower 95% CL | upper 95% CL |
| 1 | 80 | 4 | 0.95 | 0.0244 | 0.90342 | 0.999 |
| 2 | 76 | 4 | 0.9 | 0.0335 | 0.8366 | 0.9682 |
| 3 | 72 | 3 | 0.8625 | 0.0385 | 0.79024 | 0.9414 |
| 4 | 69 | 2 | 0.8375 | 0.0412 | 0.76044 | 0.9224 |
| 5 | 67 | 2 | 0.8125 | 0.0436 | 0.73132 | 0.9027 |
| 6 | 65 | 1 | 0.8 | 0.0447 | 0.71698 | 0.8926 |
| 7 | 64 | 1 | 0.7875 | 0.0457 | 0.70277 | 0.8824 |
| 9 | 63 | 1 | 0.775 | 0.0467 | 0.68869 | 0.8721 |
| 10 | 62 | 1 | 0.7625 | 0.0476 | 0.67473 | 0.8617 |
| 11 | 61 | 2 | 0.7375 | 0.0492 | 0.64712 | 0.8405 |
| 12 | 59 | 3 | 0.7 | 0.0512 | 0.60645 | 0.808 |
| 13 | 56 | 3 | 0.6625 | 0.0529 | 0.56658 | 0.7747 |
| 14 | 53 | 3 | 0.625 | 0.0541 | 0.52743 | 0.7406 |
| 15 | 50 | 3 | 0.5875 | 0.055 | 0.48895 | 0.7059 |
| 16 | 47 | 3 | 0.55 | 0.0556 | 0.45111 | 0.6706 |
| 17 | 44 | 4 | 0.5 | 0.0559 | 0.40161 | 0.6225 |
| 18 | 40 | 4 | 0.45 | 0.0556 | 0.35318 | 0.5734 |
| 19 | 36 | 4 | 0.4 | 0.0548 | 0.30585 | 0.5231 |
| 20 | 32 | 4 | 0.35 | 0.0533 | 0.25964 | 0.4718 |
| 21 | 28 | 3 | 0.3125 | 0.0518 | 0.22578 | 0.4325 |
| 22 | 25 | 3 | 0.275 | 0.0499 | 0.19267 | 0.3925 |
| 23 | 22 | 3 | 0.2375 | 0.0476 | 0.16038 | 0.3517 |
| 24 | 19 | 3 | 0.2 | 0.0447 | 0.12903 | 0.31 |
| 25 | 16 | 1 | 0.1875 | 0.0436 | 0.11882 | 0.2959 |
| 26 | 15 | 1 | 0.175 | 0.0425 | 0.10874 | 0.2816 |
| 27 | 14 | 1 | 0.1625 | 0.0412 | 0.09881 | 0.2672 |
| 28 | 13 | 1 | 0.15 | 0.0399 | 0.08903 | 0.2527 |
| 29 | 12 | 1 | 0.1375 | 0.0385 | 0.07942 | 0.238 |
| 30 | 11 | 1 | 0.125 | 0.037 | 0.07 | 0.2232 |
| 31 | 10 | 1 | 0.1125 | 0.0353 | 0.06079 | 0.2082 |
| 32 | 9 | 1 | 0.1 | 0.0335 | 0.05182 | 0.193 |
| 33 | 8 | 1 | 0.0875 | 0.0316 | 0.04312 | 0.1776 |
| 37 | 7 | 1 | 0.075 | 0.0294 | 0.03474 | 0.1619 |
| 38 | 6 | 1 | 0.0625 | 0.0271 | 0.02675 | 0.146 |
| 39 | 5 | 1 | 0.05 | 0.0244 | 0.01924 | 0.13 |
| 85 | 4 | 1 | 0.0375 | 0.0212 | 0.01236 | 0.1138 |
| 86 | 3 | 1 | 0.025 | 0.0175 | 0.00636 | 0.0982 |
| 277 | 2 | 1 | 0.0125 | 0.0124 | 0.00178 | 0.0877 |
| 278 | 1 | 1 | 0 | NaN | NA | NA |

**Table S157.** Odemis station Kaplan-Meier drought risk estimates according to SPI-3, 6, and 12

| Drought Risk (SPI3) | | Drought Risk (SPI6) | | Drought Risk (SPI12) | |
| --- | --- | --- | --- | --- | --- |
| Time | Drought Risk | Time | Drought Risk | Time | Drought Risk |
| 1 | 0.0208 | 1 | 0.0349 | 1 | 0.05 |
| 2 | 0.0521 | 2 | 0.093 | 2 | 0.1 |
| 3 | 0.1667 | 3 | 0.1744 | 3 | 0.1375 |
| 4 | 0.25 | 4 | 0.2442 | 4 | 0.1625 |
| 5 | 0.3333 | 5 | 0.3023 | 5 | 0.1875 |
| 6 | 0.4167 | 6 | 0.3953 | 6 | 0.2 |
| 7 | 0.5 | 7 | 0.4767 | 7 | 0.2125 |
| 8 | 0.5833 | 8 | 0.5349 | 9 | 0.225 |
| 9 | 0.6458 | 9 | 0.5814 | 10 | 0.2375 |
| 10 | 0.6875 | 10 | 0.6395 | 11 | 0.2625 |
| 11 | 0.7396 | 11 | 0.6744 | 12 | 0.3 |
| 12 | 0.7604 | 12 | 0.686 | 13 | 0.3375 |
| 13 | 0.7813 | 13 | 0.6977 | 14 | 0.375 |
| 14 | 0.7917 | 14 | 0.7093 | 15 | 0.4125 |
| 15 | 0.8021 | 15 | 0.7209 | 16 | 0.45 |
| 16 | 0.8333 | 16 | 0.7326 | 17 | 0.5 |
| 17 | 0.8438 | 17 | 0.7442 | 18 | 0.55 |
| 18 | 0.8646 | 19 | 0.7558 | 19 | 0.6 |
| 20 | 0.875 | 21 | 0.7791 | 20 | 0.65 |
| 21 | 0.8854 | 22 | 0.7907 | 21 | 0.6875 |
| 22 | 0.8958 | 23 | 0.814 | 22 | 0.725 |
| 27 | 0.9063 | 24 | 0.8256 | 23 | 0.7625 |
| 32 | 0.9167 | 25 | 0.8372 | 24 | 0.8 |
| 33 | 0.9271 | 26 | 0.8488 | 25 | 0.8125 |
| 34 | 0.9375 | 27 | 0.8605 | 26 | 0.825 |
| 36 | 0.9479 | 28 | 0.8721 | 27 | 0.8375 |
| 37 | 0.9688 | 29 | 0.8837 | 28 | 0.85 |
| 48 | 0.9792 | 30 | 0.8953 | 29 | 0.8625 |
| 49 | 0.9896 | 34 | 0.907 | 30 | 0.875 |
| 50 | 1 | 39 | 0.9186 | 31 | 0.8875 |
|  |  | 45 | 0.9302 | 32 | 0.9 |
|  |  | 46 | 0.9535 | 33 | 0.9125 |
|  |  | 47 | 0.9651 | 37 | 0.925 |
|  |  | 48 | 0.9767 | 38 | 0.9375 |
|  |  | 49 | 0.9884 | 39 | 0.95 |
|  |  | 133 | 1 | 85 | 0.9625 |
|  |  |  |  | 86 | 0.975 |
|  |  |  |  | 277 | 0.9875 |
|  |  |  |  | 278 | 1 |

**Table S158.** Odemis station Kaplan-Meier survival estimates according to SPEI-3

| Kaplan-Meier Wet to Dry (SPEI3) | | | | | | | |
| --- | --- | --- | --- | --- | --- | --- | --- |
|  |  | n | events | median | 0.95LCL | 0.95UCL |
|  |  | 93 | 93 | 7 | 6 | 8 |
| time | n.risk | n.event | survival | std.err | lower 95% CI | upper 95% CI |
| 1 | 93 | 2 | 0.9785 | 0.015 | 0.94945 | 10.000 |
| 2 | 91 | 1 | 0.9677 | 0.0183 | 0.93249 | 10.000 |
| 3 | 90 | 9 | 0.871 | 0.0348 | 0.80543 | 0.9418 |
| 4 | 81 | 8 | 0.7849 | 0.0426 | 0.70573 | 0.8731 |
| 5 | 73 | 9 | 0.6882 | 0.048 | 0.60018 | 0.7891 |
| 6 | 64 | 11 | 0.5699 | 0.0513 | 0.47765 | 0.6799 |
| 7 | 53 | 9 | 0.4731 | 0.0518 | 0.38179 | 0.5863 |
| 8 | 44 | 8 | 0.3871 | 0.0505 | 0.29975 | 0.4999 |
| 9 | 36 | 6 | 0.3226 | 0.0485 | 0.24029 | 0.4331 |
| 10 | 30 | 5 | 0.2688 | 0.046 | 0.19226 | 0.3759 |
| 11 | 25 | 3 | 0.2366 | 0.0441 | 0.1642 | 0.3408 |
| 12 | 22 | 1 | 0.2258 | 0.0434 | 0.15499 | 0.329 |
| 13 | 21 | 2 | 0.2043 | 0.0418 | 0.1368 | 0.3051 |
| 14 | 19 | 1 | 0.1935 | 0.041 | 0.12783 | 0.2931 |
| 15 | 18 | 1 | 0.1828 | 0.0401 | 0.11894 | 0.2809 |
| 16 | 17 | 1 | 0.172 | 0.0391 | 0.11016 | 0.2687 |
| 17 | 16 | 1 | 0.1613 | 0.0381 | 0.10147 | 0.2564 |
| 18 | 15 | 2 | 0.1398 | 0.036 | 0.08443 | 0.2314 |
| 21 | 13 | 1 | 0.129 | 0.0348 | 0.0761 | 0.2188 |
| 22 | 12 | 4 | 0.086 | 0.0291 | 0.04435 | 0.1668 |
| 23 | 8 | 1 | 0.0753 | 0.0274 | 0.03692 | 0.1535 |
| 31 | 7 | 1 | 0.0645 | 0.0255 | 0.02976 | 0.1399 |
| 32 | 6 | 1 | 0.0538 | 0.0234 | 0.02292 | 0.1261 |
| 36 | 5 | 1 | 0.043 | 0.021 | 0.01649 | 0.1122 |
| 37 | 4 | 1 | 0.0323 | 0.0183 | 0.0106 | 0.0982 |
| 41 | 3 | 1 | 0.0215 | 0.015 | 0.00546 | 0.0847 |
| 42 | 2 | 1 | 0.0108 | 0.0107 | 0.00153 | 0.0755 |
| 43 | 1 | 1 | 0 | NaN | NA | NA |

**Table S159.** Odemis station Kaplan-Meier survival estimates according to SPEI-6

| Kaplan-Meier Wet to Dry (SPEI6) | | | | | | | |
| --- | --- | --- | --- | --- | --- | --- | --- |
|  |  | n | events | median | 0.95LCL | 0.95UCL |
|  |  | 94 | 94 | 9 | 7 | 11 |
| time | n.risk | n.event | survival | std.err | lower 95% CI | upper 95% CI |
| 1 | 94 | 4 | 0.9574 | 0.0208 | 0.9175 | 0.9991 |
| 2 | 90 | 5 | 0.9043 | 0.0303 | 0.84669 | 0.9657 |
| 3 | 85 | 5 | 0.8511 | 0.0367 | 0.78205 | 0.9262 |
| 4 | 80 | 5 | 0.7979 | 0.0414 | 0.72068 | 0.8833 |
| 5 | 75 | 6 | 0.734 | 0.0456 | 0.64994 | 0.829 |
| 6 | 69 | 10 | 0.6277 | 0.0499 | 0.53716 | 0.7334 |
| 7 | 59 | 6 | 0.5638 | 0.0511 | 0.47199 | 0.6735 |
| 8 | 53 | 5 | 0.5106 | 0.0516 | 0.41895 | 0.6224 |
| 9 | 48 | 6 | 0.4468 | 0.0513 | 0.35681 | 0.5595 |
| 10 | 42 | 5 | 0.3936 | 0.0504 | 0.30627 | 0.5059 |
| 11 | 37 | 2 | 0.3723 | 0.0499 | 0.28639 | 0.4841 |
| 12 | 35 | 1 | 0.3617 | 0.0496 | 0.27652 | 0.4731 |
| 13 | 34 | 1 | 0.3511 | 0.0492 | 0.2667 | 0.4621 |
| 14 | 33 | 1 | 0.3404 | 0.0489 | 0.25693 | 0.4511 |
| 15 | 32 | 1 | 0.3298 | 0.0485 | 0.24722 | 0.4399 |
| 16 | 31 | 1 | 0.3191 | 0.0481 | 0.23755 | 0.4288 |
| 17 | 30 | 2 | 0.2979 | 0.0472 | 0.21839 | 0.4063 |
| 18 | 28 | 3 | 0.266 | 0.0456 | 0.19009 | 0.3721 |
| 19 | 25 | 2 | 0.2447 | 0.0443 | 0.17153 | 0.349 |
| 20 | 23 | 1 | 0.234 | 0.0437 | 0.16236 | 0.3374 |
| 21 | 22 | 2 | 0.2128 | 0.0422 | 0.14422 | 0.3139 |
| 22 | 20 | 1 | 0.2021 | 0.0414 | 0.13527 | 0.302 |
| 23 | 19 | 1 | 0.1915 | 0.0406 | 0.1264 | 0.2901 |
| 24 | 18 | 1 | 0.1809 | 0.0397 | 0.11762 | 0.2781 |
| 25 | 17 | 1 | 0.1702 | 0.0388 | 0.10893 | 0.266 |
| 26 | 16 | 1 | 0.1596 | 0.0378 | 0.10034 | 0.2538 |
| 27 | 15 | 1 | 0.1489 | 0.0367 | 0.09186 | 0.2415 |
| 28 | 14 | 1 | 0.1383 | 0.0356 | 0.0835 | 0.2291 |
| 29 | 13 | 1 | 0.1277 | 0.0344 | 0.07526 | 0.2165 |
| 30 | 12 | 1 | 0.117 | 0.0332 | 0.06716 | 0.2039 |
| 31 | 11 | 1 | 0.1064 | 0.0318 | 0.05921 | 0.1911 |
| 43 | 10 | 1 | 0.0957 | 0.0303 | 0.05144 | 0.1782 |
| 44 | 9 | 1 | 0.0851 | 0.0288 | 0.04386 | 0.1651 |
| 45 | 8 | 1 | 0.0745 | 0.0271 | 0.03651 | 0.1519 |
| 46 | 7 | 1 | 0.0638 | 0.0252 | 0.02943 | 0.1384 |
| 62 | 6 | 1 | 0.0532 | 0.0231 | 0.02267 | 0.1248 |
| 68 | 5 | 1 | 0.0426 | 0.0208 | 0.01631 | 0.111 |
| 69 | 4 | 1 | 0.0319 | 0.0181 | 0.01048 | 0.0972 |
| 70 | 3 | 1 | 0.0213 | 0.0149 | 0.0054 | 0.0838 |
| 71 | 2 | 1 | 0.0106 | 0.0106 | 0.00151 | 0.0747 |
| 87 | 1 | 1 | 0 | NaN | NA | NA |

**Table S160.** Odemis station Kaplan-Meier survival estimates according to SPEI-12

| Kaplan-Meier Wet to Dry (SPEI12) | | | | | | |
| --- | --- | --- | --- | --- | --- | --- |
|  |  | n | events | median | 0.95LCL | 0.95UCL |
|  |  | 100 | 100 | 17.5 | 15 | 20 |
| time | n.risk | n.event | survival | std.err | lower 95% CI | upper 95% CI |
| 1 | 100 | 4 | 0.96 | 0.0196 | 0.92235 | 0.9992 |
| 2 | 96 | 5 | 0.91 | 0.02862 | 0.8556 | 0.9679 |
| 3 | 91 | 4 | 0.87 | 0.03363 | 0.80652 | 0.9385 |
| 4 | 87 | 3 | 0.84 | 0.03666 | 0.77113 | 0.915 |
| 5 | 84 | 3 | 0.81 | 0.03923 | 0.73665 | 0.8907 |
| 6 | 81 | 3 | 0.78 | 0.04142 | 0.70289 | 0.8656 |
| 7 | 78 | 3 | 0.75 | 0.0433 | 0.66976 | 0.8399 |
| 8 | 75 | 3 | 0.72 | 0.0449 | 0.63716 | 0.8136 |
| 9 | 72 | 2 | 0.7 | 0.04583 | 0.61571 | 0.7958 |
| 10 | 70 | 2 | 0.68 | 0.04665 | 0.59445 | 0.7779 |
| 11 | 68 | 2 | 0.66 | 0.04737 | 0.57339 | 0.7597 |
| 12 | 66 | 2 | 0.64 | 0.048 | 0.55251 | 0.7413 |
| 13 | 64 | 2 | 0.62 | 0.04854 | 0.53181 | 0.7228 |
| 14 | 62 | 2 | 0.6 | 0.04899 | 0.51127 | 0.7041 |
| 15 | 60 | 2 | 0.58 | 0.04936 | 0.4909 | 0.6853 |
| 16 | 58 | 3 | 0.55 | 0.04975 | 0.46065 | 0.6567 |
| 17 | 55 | 5 | 0.5 | 0.05 | 0.41101 | 0.6083 |
| 18 | 50 | 4 | 0.46 | 0.04984 | 0.37199 | 0.5688 |
| 19 | 46 | 4 | 0.42 | 0.04936 | 0.3336 | 0.5288 |
| 20 | 42 | 3 | 0.39 | 0.04877 | 0.30522 | 0.4983 |
| 21 | 39 | 1 | 0.38 | 0.04854 | 0.29584 | 0.4881 |
| 22 | 38 | 1 | 0.37 | 0.04828 | 0.2865 | 0.4778 |
| 23 | 37 | 1 | 0.36 | 0.048 | 0.27721 | 0.4675 |
| 24 | 36 | 1 | 0.35 | 0.0477 | 0.26796 | 0.4572 |
| 25 | 35 | 1 | 0.34 | 0.04737 | 0.25875 | 0.4468 |
| 26 | 34 | 1 | 0.33 | 0.04702 | 0.24959 | 0.4363 |
| 27 | 33 | 1 | 0.32 | 0.04665 | 0.24047 | 0.4258 |
| 28 | 32 | 1 | 0.31 | 0.04625 | 0.2314 | 0.4153 |
| 29 | 31 | 1 | 0.3 | 0.04583 | 0.22238 | 0.4047 |
| 30 | 30 | 1 | 0.29 | 0.04538 | 0.21341 | 0.3941 |
| 31 | 29 | 1 | 0.28 | 0.0449 | 0.20449 | 0.3834 |
| 32 | 28 | 1 | 0.27 | 0.0444 | 0.19561 | 0.3727 |
| 33 | 27 | 1 | 0.26 | 0.04386 | 0.1868 | 0.3619 |
| 34 | 26 | 1 | 0.25 | 0.0433 | 0.17804 | 0.3511 |
| 35 | 25 | 1 | 0.24 | 0.04271 | 0.16933 | 0.3402 |
| 36 | 24 | 2 | 0.22 | 0.04142 | 0.15211 | 0.3182 |
| 37 | 22 | 2 | 0.2 | 0.04 | 0.13514 | 0.296 |
| 38 | 20 | 2 | 0.18 | 0.03842 | 0.11847 | 0.2735 |
| 39 | 18 | 1 | 0.17 | 0.03756 | 0.11025 | 0.2621 |
| 40 | 17 | 1 | 0.16 | 0.03666 | 0.10211 | 0.2507 |
| 41 | 16 | 1 | 0.15 | 0.03571 | 0.09407 | 0.2392 |
| 74 | 15 | 1 | 0.14 | 0.0347 | 0.08613 | 0.2276 |
| 75 | 14 | 1 | 0.13 | 0.03363 | 0.0783 | 0.2158 |
| 76 | 13 | 1 | 0.12 | 0.0325 | 0.07058 | 0.204 |
| 77 | 12 | 1 | 0.11 | 0.03129 | 0.06299 | 0.1921 |
| 78 | 11 | 1 | 0.1 | 0.03 | 0.05554 | 0.18 |
| 79 | 10 | 1 | 0.09 | 0.02862 | 0.04826 | 0.1678 |
| 80 | 9 | 1 | 0.08 | 0.02713 | 0.04116 | 0.1555 |
| 81 | 8 | 1 | 0.07 | 0.02551 | 0.03426 | 0.143 |
| 82 | 7 | 1 | 0.06 | 0.02375 | 0.02762 | 0.1303 |
| 83 | 6 | 1 | 0.05 | 0.02179 | 0.02128 | 0.1175 |
| 84 | 5 | 1 | 0.04 | 0.0196 | 0.01531 | 0.1045 |
| 85 | 4 | 1 | 0.03 | 0.01706 | 0.00984 | 0.0914 |
| 120 | 3 | 1 | 0.02 | 0.014 | 0.00507 | 0.0789 |
| 121 | 2 | 1 | 0.01 | 0.00995 | 0.00142 | 0.0703 |
| 156 | 1 | 1 | 0 | NaN | NA | NA |

**Table S161.** Odemis station Kaplan-Meier drought risk estimates according to SPEI-3, 6, and 12

| Drought Risk (SPEI3) | | Drought Risk (SPEI6) | | Drought Risk (SPEI12) | |
| --- | --- | --- | --- | --- | --- |
| Time | Drought Risk | Time | Drought Risk | Time | Drought Risk |
| 1 | 0.0215 | 1 | 0.0426 | 1 | 0.04 |
| 2 | 0.0323 | 2 | 0.0957 | 2 | 0.09 |
| 3 | 0.129 | 3 | 0.1489 | 3 | 0.13 |
| 4 | 0.2151 | 4 | 0.2021 | 4 | 0.16 |
| 5 | 0.3118 | 5 | 0.266 | 5 | 0.19 |
| 6 | 0.4301 | 6 | 0.3723 | 6 | 0.22 |
| 7 | 0.5269 | 7 | 0.4362 | 7 | 0.25 |
| 8 | 0.6129 | 8 | 0.4894 | 8 | 0.28 |
| 9 | 0.6774 | 9 | 0.5532 | 9 | 0.3 |
| 10 | 0.7312 | 10 | 0.6064 | 10 | 0.32 |
| 11 | 0.7634 | 11 | 0.6277 | 11 | 0.34 |
| 12 | 0.7742 | 12 | 0.6383 | 12 | 0.36 |
| 13 | 0.7957 | 13 | 0.6489 | 13 | 0.38 |
| 14 | 0.8065 | 14 | 0.6596 | 14 | 0.4 |
| 15 | 0.8172 | 15 | 0.6702 | 15 | 0.42 |
| 16 | 0.828 | 16 | 0.6809 | 16 | 0.45 |
| 17 | 0.8387 | 17 | 0.7021 | 17 | 0.5 |
| 18 | 0.8602 | 18 | 0.734 | 18 | 0.54 |
| 21 | 0.871 | 19 | 0.7553 | 19 | 0.58 |
| 22 | 0.914 | 20 | 0.766 | 20 | 0.61 |
| 23 | 0.9247 | 21 | 0.7872 | 21 | 0.62 |
| 31 | 0.9355 | 22 | 0.7979 | 22 | 0.63 |
| 32 | 0.9462 | 23 | 0.8085 | 23 | 0.64 |
| 36 | 0.957 | 24 | 0.8191 | 24 | 0.65 |
| 37 | 0.9677 | 25 | 0.8298 | 25 | 0.66 |
| 41 | 0.9785 | 26 | 0.8404 | 26 | 0.67 |
| 42 | 0.9892 | 27 | 0.8511 | 27 | 0.68 |
| 43 | 1 | 28 | 0.8617 | 28 | 0.69 |
|  |  | 29 | 0.8723 | 29 | 0.7 |
|  |  | 30 | 0.883 | 30 | 0.71 |
|  |  | 31 | 0.8936 | 31 | 0.72 |
|  |  | 43 | 0.9043 | 32 | 0.73 |
|  |  | 44 | 0.9149 | 33 | 0.74 |
|  |  | 45 | 0.9255 | 34 | 0.75 |
|  |  | 46 | 0.9362 | 35 | 0.76 |
|  |  | 62 | 0.9468 | 36 | 0.78 |
|  |  | 68 | 0.9574 | 37 | 0.8 |
|  |  | 69 | 0.9681 | 38 | 0.82 |
|  |  | 70 | 0.9787 | 39 | 0.83 |
|  |  | 71 | 0.9894 | 40 | 0.84 |
|  |  | 87 | 1 | 41 | 0.85 |
|  |  |  |  | 74 | 0.86 |
|  |  |  |  | 75 | 0.87 |
|  |  |  |  | 76 | 0.88 |
|  |  |  |  | 77 | 0.89 |
|  |  |  |  | 78 | 0.9 |
|  |  |  |  | 79 | 0.91 |
|  |  |  |  | 80 | 0.92 |
|  |  |  |  | 81 | 0.93 |
|  |  |  |  | 82 | 0.94 |
|  |  |  |  | 83 | 0.95 |
|  |  |  |  | 84 | 0.96 |
|  |  |  |  | 85 | 0.97 |
|  |  |  |  | 120 | 0.98 |
|  |  |  |  | 121 | 0.99 |
|  |  |  |  | 156 | 1 |

**Table S162.** Salihli station Kaplan-Meier survival estimates according to SPI-3

| Kaplan-Meier Wet to Dry (SPI3) | | | | | | |
| --- | --- | --- | --- | --- | --- | --- |
|  |  | n | events | median | 0.95LCL | 0.95UCL |
|  |  | 140 | 140 | 12 | 10 | 14 |
| time | n.risk | n.event | survival | std.err | lower 95% CL | upper 95% CL |
| 1 | 140 | 6 | 0.95714 | 0.01712 | 0.92417 | 0.9913 |
| 2 | 134 | 5 | 0.92143 | 0.02274 | 0.87792 | 0.9671 |
| 3 | 129 | 6 | 0.87857 | 0.0276 | 0.8261 | 0.9344 |
| 4 | 123 | 7 | 0.82857 | 0.03185 | 0.76844 | 0.8934 |
| 5 | 116 | 5 | 0.79286 | 0.03425 | 0.72849 | 0.8629 |
| 6 | 111 | 5 | 0.75714 | 0.03624 | 0.68934 | 0.8316 |
| 7 | 106 | 10 | 0.68571 | 0.03923 | 0.61297 | 0.7671 |
| 8 | 96 | 6 | 0.64286 | 0.0405 | 0.56819 | 0.7273 |
| 9 | 90 | 8 | 0.58571 | 0.04163 | 0.50955 | 0.6733 |
| 10 | 82 | 4 | 0.55714 | 0.04198 | 0.48065 | 0.6458 |
| 11 | 78 | 5 | 0.52143 | 0.04222 | 0.44491 | 0.6111 |
| 12 | 73 | 4 | 0.49286 | 0.04225 | 0.41663 | 0.583 |
| 13 | 69 | 5 | 0.45714 | 0.0421 | 0.38164 | 0.5476 |
| 14 | 64 | 7 | 0.40714 | 0.04152 | 0.33338 | 0.4972 |
| 15 | 57 | 7 | 0.35714 | 0.0405 | 0.28597 | 0.446 |
| 16 | 50 | 7 | 0.30714 | 0.03899 | 0.23949 | 0.3939 |
| 17 | 43 | 6 | 0.26429 | 0.03727 | 0.20047 | 0.3484 |
| 18 | 37 | 5 | 0.22857 | 0.03549 | 0.1686 | 0.3099 |
| 19 | 32 | 2 | 0.21429 | 0.03468 | 0.15604 | 0.2943 |
| 20 | 30 | 2 | 0.2 | 0.03381 | 0.1436 | 0.2786 |
| 21 | 28 | 2 | 0.18571 | 0.03287 | 0.13128 | 0.2627 |
| 22 | 26 | 2 | 0.17143 | 0.03185 | 0.1191 | 0.2467 |
| 23 | 24 | 1 | 0.16429 | 0.03132 | 0.11307 | 0.2387 |
| 24 | 23 | 2 | 0.15 | 0.03018 | 0.10112 | 0.2225 |
| 25 | 21 | 2 | 0.13571 | 0.02895 | 0.08935 | 0.2061 |
| 26 | 19 | 2 | 0.12143 | 0.0276 | 0.07777 | 0.1896 |
| 27 | 17 | 3 | 0.1 | 0.02535 | 0.06084 | 0.1644 |
| 28 | 14 | 3 | 0.07857 | 0.02274 | 0.04456 | 0.1386 |
| 29 | 11 | 1 | 0.07143 | 0.02177 | 0.03931 | 0.1298 |
| 30 | 10 | 1 | 0.06429 | 0.02073 | 0.03417 | 0.1209 |
| 31 | 9 | 1 | 0.05714 | 0.01962 | 0.02916 | 0.112 |
| 32 | 8 | 1 | 0.05 | 0.01842 | 0.02429 | 0.1029 |
| 33 | 7 | 1 | 0.04286 | 0.01712 | 0.01959 | 0.0938 |
| 37 | 6 | 1 | 0.03571 | 0.01568 | 0.0151 | 0.0845 |
| 38 | 5 | 2 | 0.02143 | 0.01224 | 0.007 | 0.0656 |
| 39 | 3 | 2 | 0.00714 | 0.00712 | 0.00101 | 0.0504 |
| 40 | 1 | 1 | 0 | NaN | NA | NA |

**Table S163.** Salihli station Kaplan-Meier survival estimates according to SPI-6

| Kaplan-Meier Wet to Dry (SPI6) | | | | | | |
| --- | --- | --- | --- | --- | --- | --- |
|  |  | n | events | median | 0.95LCL | 0.95UCL |
|  |  | 133 | 133 | 12 | 10 | 18 |
| time | n.risk | n.event | survival | std.err | lower 95% CL | upper 95% CL |
| 1 | 133 | 8 | 0.93985 | 0.02062 | 0.9003 | 0.9811 |
| 2 | 125 | 8 | 0.8797 | 0.02821 | 0.82611 | 0.9368 |
| 3 | 117 | 7 | 0.82707 | 0.03279 | 0.76523 | 0.8939 |
| 4 | 110 | 3 | 0.80451 | 0.03439 | 0.73986 | 0.8748 |
| 5 | 107 | 5 | 0.76692 | 0.03666 | 0.69833 | 0.8422 |
| 6 | 102 | 2 | 0.75188 | 0.03745 | 0.68194 | 0.829 |
| 7 | 100 | 6 | 0.70677 | 0.03947 | 0.63348 | 0.7885 |
| 8 | 94 | 6 | 0.66165 | 0.04103 | 0.58594 | 0.7472 |
| 9 | 88 | 6 | 0.61654 | 0.04216 | 0.53921 | 0.705 |
| 10 | 82 | 8 | 0.55639 | 0.04308 | 0.47805 | 0.6476 |
| 11 | 74 | 4 | 0.52632 | 0.0433 | 0.44795 | 0.6184 |
| 12 | 70 | 4 | 0.49624 | 0.04335 | 0.41814 | 0.5889 |
| 13 | 66 | 5 | 0.45865 | 0.04321 | 0.38132 | 0.5517 |
| 14 | 61 | 2 | 0.44361 | 0.04308 | 0.36672 | 0.5366 |
| 15 | 59 | 1 | 0.43609 | 0.043 | 0.35946 | 0.5291 |
| 16 | 58 | 1 | 0.42857 | 0.04291 | 0.35221 | 0.5215 |
| 17 | 57 | 2 | 0.41353 | 0.0427 | 0.33776 | 0.5063 |
| 18 | 55 | 3 | 0.39098 | 0.04231 | 0.31625 | 0.4834 |
| 19 | 52 | 3 | 0.36842 | 0.04183 | 0.29492 | 0.4602 |
| 20 | 49 | 3 | 0.34586 | 0.04124 | 0.27378 | 0.4369 |
| 21 | 46 | 2 | 0.33083 | 0.0408 | 0.25979 | 0.4213 |
| 22 | 44 | 3 | 0.30827 | 0.04004 | 0.23898 | 0.3976 |
| 23 | 41 | 3 | 0.28571 | 0.03917 | 0.21839 | 0.3738 |
| 24 | 38 | 3 | 0.26316 | 0.03818 | 0.19802 | 0.3497 |
| 25 | 35 | 2 | 0.24812 | 0.03745 | 0.18458 | 0.3335 |
| 26 | 33 | 2 | 0.23308 | 0.03666 | 0.17125 | 0.3172 |
| 27 | 31 | 3 | 0.21053 | 0.03535 | 0.15149 | 0.2926 |
| 28 | 28 | 1 | 0.20301 | 0.03488 | 0.14497 | 0.2843 |
| 29 | 27 | 1 | 0.19549 | 0.03439 | 0.13848 | 0.276 |
| 30 | 26 | 1 | 0.18797 | 0.03388 | 0.13203 | 0.2676 |
| 32 | 25 | 2 | 0.17293 | 0.03279 | 0.11925 | 0.2508 |
| 34 | 23 | 1 | 0.16541 | 0.03222 | 0.11292 | 0.2423 |
| 35 | 22 | 1 | 0.15789 | 0.03162 | 0.10664 | 0.2338 |
| 36 | 21 | 2 | 0.14286 | 0.03034 | 0.09421 | 0.2166 |
| 37 | 19 | 1 | 0.13534 | 0.02966 | 0.08808 | 0.208 |
| 38 | 18 | 2 | 0.1203 | 0.02821 | 0.07598 | 0.1905 |
| 39 | 16 | 3 | 0.09774 | 0.02575 | 0.05832 | 0.1638 |
| 40 | 13 | 1 | 0.09023 | 0.02484 | 0.0526 | 0.1548 |
| 41 | 12 | 1 | 0.08271 | 0.02388 | 0.04696 | 0.1457 |
| 42 | 11 | 2 | 0.06767 | 0.02178 | 0.03601 | 0.1272 |
| 43 | 9 | 2 | 0.05263 | 0.01936 | 0.02559 | 0.1082 |
| 44 | 7 | 1 | 0.04511 | 0.018 | 0.02064 | 0.0986 |
| 45 | 6 | 1 | 0.03759 | 0.01649 | 0.01591 | 0.0888 |
| 46 | 5 | 1 | 0.03008 | 0.01481 | 0.01146 | 0.079 |
| 47 | 4 | 1 | 0.02256 | 0.01288 | 0.00737 | 0.069 |
| 48 | 3 | 1 | 0.01504 | 0.01055 | 0.0038 | 0.0595 |
| 57 | 2 | 1 | 0.00752 | 0.00749 | 0.00107 | 0.053 |
| 91 | 1 | 1 | 0 | NaN | NA | NA |

**Table S164.** Salihli station Kaplan-Meier survival estimates according to SPI-12

| Kaplan-Meier Wet to Dry (SPI12) | | | | | | |
| --- | --- | --- | --- | --- | --- | --- |
|  |  | n | events | median | 0.95LCL | 0.95UCL |
|  |  | 130 | 130 | 25 | 21 | 29 |
| time | n.risk | n.event | survival | std.err | lower 95% CL | upper 95% CL |
| 1 | 130 | 5 | 0.96154 | 0.01687 | 0.92904 | 0.9952 |
| 2 | 125 | 6 | 0.91538 | 0.02441 | 0.86877 | 0.9645 |
| 3 | 119 | 3 | 0.89231 | 0.02719 | 0.84058 | 0.9472 |
| 4 | 116 | 3 | 0.86923 | 0.02957 | 0.81316 | 0.9292 |
| 5 | 113 | 2 | 0.85385 | 0.03098 | 0.79523 | 0.9168 |
| 11 | 111 | 1 | 0.84615 | 0.03164 | 0.78635 | 0.9105 |
| 12 | 110 | 3 | 0.82308 | 0.03347 | 0.76003 | 0.8914 |
| 13 | 107 | 4 | 0.79231 | 0.03558 | 0.72556 | 0.8652 |
| 14 | 103 | 4 | 0.76154 | 0.03738 | 0.6917 | 0.8384 |
| 15 | 99 | 4 | 0.73077 | 0.0389 | 0.65836 | 0.8111 |
| 16 | 95 | 3 | 0.70769 | 0.03989 | 0.63367 | 0.7904 |
| 17 | 92 | 4 | 0.67692 | 0.04102 | 0.60112 | 0.7623 |
| 18 | 88 | 4 | 0.64615 | 0.04194 | 0.56897 | 0.7338 |
| 19 | 84 | 3 | 0.62308 | 0.0425 | 0.5451 | 0.7122 |
| 20 | 81 | 3 | 0.6 | 0.04297 | 0.52143 | 0.6904 |
| 21 | 78 | 3 | 0.57692 | 0.04333 | 0.49795 | 0.6684 |
| 22 | 75 | 3 | 0.55385 | 0.0436 | 0.47466 | 0.6462 |
| 23 | 72 | 3 | 0.53077 | 0.04377 | 0.45156 | 0.6239 |
| 24 | 69 | 3 | 0.50769 | 0.04385 | 0.42863 | 0.6013 |
| 25 | 66 | 2 | 0.49231 | 0.04385 | 0.41345 | 0.5862 |
| 26 | 64 | 3 | 0.46923 | 0.04377 | 0.39083 | 0.5634 |
| 27 | 61 | 3 | 0.44615 | 0.0436 | 0.36839 | 0.5403 |
| 28 | 58 | 3 | 0.42308 | 0.04333 | 0.34613 | 0.5171 |
| 29 | 55 | 3 | 0.4 | 0.04297 | 0.32406 | 0.4937 |
| 30 | 52 | 1 | 0.39231 | 0.04282 | 0.31675 | 0.4859 |
| 31 | 51 | 1 | 0.38462 | 0.04267 | 0.30945 | 0.478 |
| 32 | 50 | 1 | 0.37692 | 0.0425 | 0.30218 | 0.4702 |
| 33 | 49 | 2 | 0.36154 | 0.04214 | 0.2877 | 0.4543 |
| 34 | 47 | 2 | 0.34615 | 0.04173 | 0.27332 | 0.4384 |
| 35 | 45 | 2 | 0.33077 | 0.04126 | 0.25902 | 0.4224 |
| 36 | 43 | 3 | 0.30769 | 0.04048 | 0.23776 | 0.3982 |
| 37 | 40 | 3 | 0.28462 | 0.03958 | 0.21672 | 0.3738 |
| 38 | 37 | 2 | 0.26923 | 0.0389 | 0.20283 | 0.3574 |
| 39 | 35 | 2 | 0.25385 | 0.03817 | 0.18905 | 0.3409 |
| 40 | 33 | 1 | 0.24615 | 0.03778 | 0.1822 | 0.3325 |
| 41 | 32 | 1 | 0.23846 | 0.03738 | 0.17539 | 0.3242 |
| 42 | 31 | 1 | 0.23077 | 0.03695 | 0.16861 | 0.3158 |
| 43 | 30 | 1 | 0.22308 | 0.03651 | 0.16186 | 0.3075 |
| 44 | 29 | 1 | 0.21538 | 0.03605 | 0.15514 | 0.299 |
| 45 | 28 | 1 | 0.20769 | 0.03558 | 0.14846 | 0.2906 |
| 46 | 27 | 1 | 0.2 | 0.03508 | 0.14181 | 0.2821 |
| 47 | 26 | 1 | 0.19231 | 0.03457 | 0.13521 | 0.2735 |
| 48 | 25 | 1 | 0.18462 | 0.03403 | 0.12864 | 0.2649 |
| 49 | 24 | 1 | 0.17692 | 0.03347 | 0.12211 | 0.2563 |
| 50 | 23 | 1 | 0.16923 | 0.03289 | 0.11563 | 0.2477 |
| 69 | 22 | 1 | 0.16154 | 0.03228 | 0.10919 | 0.239 |
| 70 | 21 | 1 | 0.15385 | 0.03164 | 0.1028 | 0.2302 |
| 85 | 20 | 1 | 0.14615 | 0.03098 | 0.09646 | 0.2214 |
| 94 | 19 | 1 | 0.13846 | 0.03029 | 0.09018 | 0.2126 |
| 95 | 18 | 1 | 0.13077 | 0.02957 | 0.08395 | 0.2037 |
| 96 | 17 | 1 | 0.12308 | 0.02881 | 0.07779 | 0.1947 |
| 97 | 16 | 1 | 0.11538 | 0.02802 | 0.07169 | 0.1857 |
| 98 | 15 | 1 | 0.10769 | 0.02719 | 0.06566 | 0.1766 |
| 99 | 14 | 1 | 0.1 | 0.02631 | 0.05971 | 0.1675 |
| 100 | 13 | 1 | 0.09231 | 0.02539 | 0.05384 | 0.1582 |
| 101 | 12 | 1 | 0.08462 | 0.02441 | 0.04807 | 0.1489 |
| 102 | 11 | 1 | 0.07692 | 0.02337 | 0.04241 | 0.1395 |
| 103 | 10 | 1 | 0.06923 | 0.02226 | 0.03686 | 0.13 |
| 104 | 9 | 1 | 0.06154 | 0.02108 | 0.03145 | 0.1204 |
| 136 | 8 | 1 | 0.05385 | 0.0198 | 0.02619 | 0.1107 |
| 137 | 7 | 1 | 0.04615 | 0.0184 | 0.02113 | 0.1008 |
| 138 | 6 | 1 | 0.03846 | 0.01687 | 0.01628 | 0.0908 |
| 139 | 5 | 1 | 0.03077 | 0.01515 | 0.01173 | 0.0807 |
| 140 | 4 | 1 | 0.02308 | 0.01317 | 0.00754 | 0.0706 |
| 141 | 3 | 1 | 0.01538 | 0.01079 | 0.00389 | 0.0609 |
| 142 | 2 | 1 | 0.00769 | 0.00766 | 0.00109 | 0.0542 |
| 143 | 1 | 1 | 0 | NaN | NA | NA |

**Table S165.** Salihli station Kaplan-Meier drought risk estimates according to SPI-3, 6, and 12

| Drought Risk (SPI3) | | Drought Risk (SPI6) | | Drought Risk (SPI12) | |
| --- | --- | --- | --- | --- | --- |
| Time | Drought Risk | Time | Drought Risk | Time | Drought Risk |
| 1 | 0.04286 | 1 | 0.06015 | 1 | 0.03846 |
| 2 | 0.07857 | 2 | 0.1203 | 2 | 0.08462 |
| 3 | 0.12143 | 3 | 0.17293 | 3 | 0.10769 |
| 4 | 0.17143 | 4 | 0.19549 | 4 | 0.13077 |
| 5 | 0.20714 | 5 | 0.23308 | 5 | 0.14615 |
| 6 | 0.24286 | 6 | 0.24812 | 6 | 0.147433 |
| 7 | 0.31429 | 7 | 0.29323 | 11 | 0.15385 |
| 8 | 0.35714 | 8 | 0.33835 | 12 | 0.17692 |
| 9 | 0.41429 | 9 | 0.38346 | 13 | 0.20769 |
| 10 | 0.44286 | 10 | 0.44361 | 14 | 0.23846 |
| 11 | 0.47857 | 11 | 0.47368 | 15 | 0.26923 |
| 12 | 0.50714 | 12 | 0.50376 | 16 | 0.29231 |
| 13 | 0.54286 | 13 | 0.54135 | 17 | 0.32308 |
| 14 | 0.59286 | 14 | 0.55639 | 18 | 0.35385 |
| 15 | 0.64286 | 15 | 0.56391 | 19 | 0.37692 |
| 16 | 0.69286 | 16 | 0.57143 | 20 | 0.4 |
| 17 | 0.73571 | 17 | 0.58647 | 21 | 0.42308 |
| 18 | 0.77143 | 18 | 0.60902 | 22 | 0.44615 |
| 19 | 0.78571 | 19 | 0.63158 | 23 | 0.46923 |
| 20 | 0.8 | 20 | 0.65414 | 24 | 0.49231 |
| 21 | 0.81429 | 21 | 0.66917 | 25 | 0.50769 |
| 22 | 0.82857 | 22 | 0.69173 | 26 | 0.53077 |
| 23 | 0.83571 | 23 | 0.71429 | 27 | 0.55385 |
| 24 | 0.85 | 24 | 0.73684 | 28 | 0.57692 |
| 25 | 0.86429 | 25 | 0.75188 | 29 | 0.6 |
| 26 | 0.87857 | 26 | 0.76692 | 30 | 0.60769 |
| 27 | 0.9 | 27 | 0.78947 | 31 | 0.61538 |
| 28 | 0.92143 | 28 | 0.79699 | 32 | 0.62308 |
| 29 | 0.92857 | 29 | 0.80451 | 33 | 0.63846 |
| 30 | 0.93571 | 30 | 0.81203 | 34 | 0.65385 |
| 31 | 0.94286 | 32 | 0.82707 | 35 | 0.66923 |
| 32 | 0.95 | 34 | 0.83459 | 36 | 0.69231 |
| 33 | 0.95714 | 35 | 0.84211 | 37 | 0.71538 |
| 37 | 0.96429 | 36 | 0.85714 | 38 | 0.73077 |
| 38 | 0.97857 | 37 | 0.86466 | 39 | 0.74615 |
| 39 | 0.99286 | 38 | 0.8797 | 40 | 0.75385 |
| 40 | 1 | 39 | 0.90226 | 41 | 0.76154 |
|  |  | 40 | 0.90977 | 42 | 0.76923 |
|  |  | 41 | 0.91729 | 43 | 0.77692 |
|  |  | 42 | 0.93233 | 44 | 0.78462 |
|  |  | 43 | 0.94737 | 45 | 0.79231 |
|  |  | 44 | 0.95489 | 46 | 0.8 |
|  |  | 45 | 0.96241 | 47 | 0.80769 |
|  |  | 46 | 0.96992 | 48 | 0.81538 |
|  |  | 47 | 0.97744 | 49 | 0.82308 |
|  |  | 48 | 0.98496 | 50 | 0.83077 |
|  |  | 57 | 0.99248 | 69 | 0.83846 |
|  |  | 91 | 1 | 70 | 0.84615 |
|  |  |  |  | 85 | 0.85385 |
|  |  |  |  | 94 | 0.86154 |
|  |  |  |  | 95 | 0.86923 |
|  |  |  |  | 96 | 0.87692 |
|  |  |  |  | 97 | 0.88462 |
|  |  |  |  | 98 | 0.89231 |
|  |  |  |  | 99 | 0.9 |
|  |  |  |  | 100 | 0.90769 |
|  |  |  |  | 101 | 0.91538 |
|  |  |  |  | 102 | 0.92308 |
|  |  |  |  | 103 | 0.93077 |
|  |  |  |  | 104 | 0.93846 |
|  |  |  |  | 136 | 0.94615 |
|  |  |  |  | 137 | 0.95385 |
|  |  |  |  | 138 | 0.96154 |
|  |  |  |  | 139 | 0.96923 |
|  |  |  |  | 140 | 0.97692 |
|  |  |  |  | 141 | 0.98462 |
|  |  |  |  | 142 | 0.99231 |
|  |  |  |  | 143 | 1 |

**Table S166.** Salihli station Kaplan-Meier survival estimates according to SPEI-3

| Kaplan-Meier Wet to Dry (SPEI3) | | | | | | | |
| --- | --- | --- | --- | --- | --- | --- | --- |
|  |  | n | events | median | 0.95LCL | 0.95UCL |
|  |  | 85 | 85 | 8 | 6 | 10 |
| time | n.risk | n.event | survival | std.err | lower 95% CI | upper 95% CI |
| 1 | 85 | 4 | 0.9529 | 0.023 | 0.90897 | 0.999 |
| 2 | 81 | 2 | 0.9294 | 0.0278 | 0.87652 | 0.9855 |
| 3 | 79 | 7 | 0.8471 | 0.039 | 0.7739 | 0.9271 |
| 4 | 72 | 7 | 0.7647 | 0.046 | 0.67964 | 0.8604 |
| 5 | 65 | 8 | 0.6706 | 0.051 | 0.57776 | 0.7783 |
| 6 | 57 | 9 | 0.5647 | 0.0538 | 0.46856 | 0.6806 |
| 7 | 48 | 5 | 0.5059 | 0.0542 | 0.41002 | 0.6242 |
| 8 | 43 | 6 | 0.4353 | 0.0538 | 0.34168 | 0.5546 |
| 9 | 37 | 2 | 0.4118 | 0.0534 | 0.31937 | 0.5309 |
| 10 | 35 | 5 | 0.3529 | 0.0518 | 0.26466 | 0.4707 |
| 11 | 30 | 2 | 0.3294 | 0.051 | 0.24323 | 0.4461 |
| 12 | 28 | 2 | 0.3059 | 0.05 | 0.22206 | 0.4213 |
| 13 | 26 | 2 | 0.2824 | 0.0488 | 0.20119 | 0.3963 |
| 14 | 24 | 2 | 0.2588 | 0.0475 | 0.18062 | 0.3709 |
| 15 | 22 | 2 | 0.2353 | 0.046 | 0.16039 | 0.3452 |
| 16 | 20 | 1 | 0.2235 | 0.0452 | 0.1504 | 0.3322 |
| 21 | 19 | 1 | 0.2118 | 0.0443 | 0.14052 | 0.3191 |
| 22 | 18 | 3 | 0.1765 | 0.0413 | 0.11149 | 0.2793 |
| 23 | 15 | 2 | 0.1529 | 0.039 | 0.09274 | 0.2522 |
| 24 | 13 | 1 | 0.1412 | 0.0378 | 0.08357 | 0.2385 |
| 25 | 12 | 2 | 0.1176 | 0.0349 | 0.06573 | 0.2106 |
| 30 | 10 | 1 | 0.1059 | 0.0334 | 0.05709 | 0.1964 |
| 31 | 9 | 1 | 0.0941 | 0.0317 | 0.04867 | 0.182 |
| 39 | 8 | 1 | 0.0824 | 0.0298 | 0.0405 | 0.1674 |
| 40 | 7 | 1 | 0.0706 | 0.0278 | 0.03264 | 0.1527 |
| 41 | 6 | 1 | 0.0588 | 0.0255 | 0.02513 | 0.1377 |
| 42 | 5 | 1 | 0.0471 | 0.023 | 0.01808 | 0.1225 |
| 43 | 4 | 2 | 0.0235 | 0.0164 | 0.00598 | 0.0926 |
| 46 | 2 | 1 | 0.0118 | 0.0117 | 0.00168 | 0.0826 |
| 56 | 1 | 1 | 0 | NaN | NA | NA |

**Table S167.** Salihli station Kaplan-Meier survival estimates according to SPEI-6

| Kaplan-Meier Wet to Dry (SPEI6) | | | | | | | |
| --- | --- | --- | --- | --- | --- | --- | --- |
|  |  | n | events | median | 0.95LCL | 0.95UCL |
|  |  | 91 | 91 | 10 | 8 | 13 |
| time | n.risk | n.event | survival | std.err | lower 95% CI | upper 95% CI |
| 1 | 91 | 6 | 0.9341 | 0.026 | 0.88444 | 0.9865 |
| 2 | 85 | 9 | 0.8352 | 0.0389 | 0.76231 | 0.915 |
| 3 | 76 | 8 | 0.7473 | 0.0456 | 0.66309 | 0.8421 |
| 4 | 68 | 5 | 0.6923 | 0.0484 | 0.60369 | 0.7939 |
| 5 | 63 | 2 | 0.6703 | 0.0493 | 0.58038 | 0.7742 |
| 6 | 61 | 2 | 0.6484 | 0.0501 | 0.55731 | 0.7543 |
| 7 | 59 | 4 | 0.6044 | 0.0513 | 0.51184 | 0.7137 |
| 8 | 55 | 4 | 0.5604 | 0.052 | 0.4672 | 0.6723 |
| 9 | 51 | 5 | 0.5055 | 0.0524 | 0.41254 | 0.6194 |
| 10 | 46 | 3 | 0.4725 | 0.0523 | 0.38032 | 0.5871 |
| 11 | 43 | 3 | 0.4396 | 0.052 | 0.34855 | 0.5543 |
| 12 | 40 | 3 | 0.4066 | 0.0515 | 0.31722 | 0.5211 |
| 13 | 37 | 3 | 0.3736 | 0.0507 | 0.28635 | 0.4875 |
| 14 | 34 | 3 | 0.3407 | 0.0497 | 0.25597 | 0.4534 |
| 15 | 31 | 2 | 0.3187 | 0.0488 | 0.23599 | 0.4304 |
| 16 | 29 | 1 | 0.3077 | 0.0484 | 0.22608 | 0.4188 |
| 17 | 28 | 1 | 0.2967 | 0.0479 | 0.21624 | 0.4071 |
| 18 | 27 | 2 | 0.2747 | 0.0468 | 0.19675 | 0.3836 |
| 21 | 25 | 1 | 0.2637 | 0.0462 | 0.1871 | 0.3718 |
| 24 | 24 | 2 | 0.2418 | 0.0449 | 0.16802 | 0.3479 |
| 25 | 22 | 1 | 0.2308 | 0.0442 | 0.15859 | 0.3358 |
| 26 | 21 | 1 | 0.2198 | 0.0434 | 0.14923 | 0.3237 |
| 27 | 20 | 2 | 0.1978 | 0.0418 | 0.13078 | 0.2992 |
| 28 | 18 | 1 | 0.1868 | 0.0409 | 0.12169 | 0.2868 |
| 29 | 17 | 1 | 0.1758 | 0.0399 | 0.11269 | 0.2743 |
| 30 | 16 | 2 | 0.1538 | 0.0378 | 0.09502 | 0.2491 |
| 31 | 14 | 2 | 0.1319 | 0.0355 | 0.07784 | 0.2234 |
| 32 | 12 | 1 | 0.1209 | 0.0342 | 0.06946 | 0.2104 |
| 37 | 11 | 1 | 0.1099 | 0.0328 | 0.06124 | 0.1972 |
| 38 | 10 | 1 | 0.0989 | 0.0313 | 0.05319 | 0.1839 |
| 39 | 9 | 2 | 0.0769 | 0.0279 | 0.03775 | 0.1567 |
| 40 | 7 | 1 | 0.0659 | 0.026 | 0.03043 | 0.1429 |
| 41 | 6 | 1 | 0.0549 | 0.0239 | 0.02344 | 0.1288 |
| 42 | 5 | 1 | 0.044 | 0.0215 | 0.01686 | 0.1146 |
| 43 | 4 | 1 | 0.033 | 0.0187 | 0.01083 | 0.1003 |
| 44 | 3 | 1 | 0.022 | 0.0154 | 0.00558 | 0.0865 |
| 66 | 2 | 1 | 0.011 | 0.0109 | 0.00156 | 0.0772 |
| 90 | 1 | 1 | 0 | NaN | NA | NA |

**Table S168.** Salihli station Kaplan-Meier survival estimates according to SPEI-12

| Kaplan-Meier Wet to Dry (SPEI12) | | | | | | | |
| --- | --- | --- | --- | --- | --- | --- | --- |
|  |  | n | events | median | 0.95LCL | 0.95UCL |
|  |  | 97 | 97 | 18 | 15 | 24 |
| time | n.risk | n.event | survival | std.err | lower 95% CI | upper 95% CI |
| 1 | 97 | 3 | 0.9691 | 0.0176 | 0.93523 | 10.000 |
| 2 | 94 | 4 | 0.9278 | 0.0263 | 0.87774 | 0.9808 |
| 3 | 90 | 3 | 0.8969 | 0.0309 | 0.83839 | 0.9595 |
| 4 | 87 | 2 | 0.8763 | 0.0334 | 0.81316 | 0.9443 |
| 5 | 85 | 2 | 0.8557 | 0.0357 | 0.78852 | 0.9285 |
| 6 | 83 | 1 | 0.8454 | 0.0367 | 0.77639 | 0.9205 |
| 7 | 82 | 1 | 0.8351 | 0.0377 | 0.76437 | 0.9123 |
| 8 | 81 | 2 | 0.8144 | 0.0395 | 0.74063 | 0.8956 |
| 9 | 79 | 2 | 0.7938 | 0.0411 | 0.71725 | 0.8785 |
| 10 | 77 | 2 | 0.7732 | 0.0425 | 0.69419 | 0.8612 |
| 11 | 75 | 1 | 0.7629 | 0.0432 | 0.68277 | 0.8524 |
| 12 | 74 | 3 | 0.732 | 0.045 | 0.64891 | 0.8256 |
| 13 | 71 | 5 | 0.6804 | 0.0473 | 0.59366 | 0.7798 |
| 14 | 66 | 5 | 0.6289 | 0.0491 | 0.53971 | 0.7327 |
| 15 | 61 | 4 | 0.5876 | 0.05 | 0.4974 | 0.6942 |
| 16 | 57 | 4 | 0.5464 | 0.0505 | 0.45578 | 0.655 |
| 17 | 53 | 4 | 0.5052 | 0.0508 | 0.41484 | 0.6151 |
| 18 | 49 | 4 | 0.4639 | 0.0506 | 0.37457 | 0.5746 |
| 19 | 45 | 2 | 0.4433 | 0.0504 | 0.35469 | 0.554 |
| 20 | 43 | 2 | 0.4227 | 0.0502 | 0.33497 | 0.5334 |
| 21 | 41 | 1 | 0.4124 | 0.05 | 0.32518 | 0.5229 |
| 23 | 40 | 1 | 0.4021 | 0.0498 | 0.31542 | 0.5125 |
| 24 | 39 | 2 | 0.3814 | 0.0493 | 0.29605 | 0.4915 |
| 25 | 37 | 1 | 0.3711 | 0.0491 | 0.28644 | 0.4809 |
| 26 | 36 | 1 | 0.3608 | 0.0488 | 0.27686 | 0.4702 |
| 27 | 35 | 1 | 0.3505 | 0.0484 | 0.26734 | 0.4596 |
| 28 | 34 | 1 | 0.3402 | 0.0481 | 0.25786 | 0.4489 |
| 29 | 33 | 1 | 0.3299 | 0.0477 | 0.24843 | 0.4381 |
| 30 | 32 | 1 | 0.3196 | 0.0473 | 0.23905 | 0.4273 |
| 31 | 31 | 1 | 0.3093 | 0.0469 | 0.22972 | 0.4164 |
| 32 | 30 | 1 | 0.299 | 0.0465 | 0.22044 | 0.4055 |
| 33 | 29 | 1 | 0.2887 | 0.046 | 0.21121 | 0.3945 |
| 34 | 28 | 1 | 0.2784 | 0.0455 | 0.20204 | 0.3835 |
| 35 | 27 | 2 | 0.2577 | 0.0444 | 0.18386 | 0.3613 |
| 36 | 25 | 2 | 0.2371 | 0.0432 | 0.16593 | 0.3388 |
| 37 | 23 | 3 | 0.2062 | 0.0411 | 0.13953 | 0.3047 |
| 38 | 20 | 2 | 0.1856 | 0.0395 | 0.1223 | 0.2816 |
| 39 | 18 | 1 | 0.1753 | 0.0386 | 0.11381 | 0.2699 |
| 40 | 17 | 1 | 0.1649 | 0.0377 | 0.10541 | 0.2581 |
| 41 | 16 | 1 | 0.1546 | 0.0367 | 0.09711 | 0.2463 |
| 42 | 15 | 1 | 0.1443 | 0.0357 | 0.0889 | 0.2343 |
| 43 | 14 | 1 | 0.134 | 0.0346 | 0.08081 | 0.2223 |
| 52 | 13 | 1 | 0.1237 | 0.0334 | 0.07284 | 0.2101 |
| 53 | 12 | 1 | 0.1134 | 0.0322 | 0.06501 | 0.1978 |
| 65 | 11 | 1 | 0.1031 | 0.0309 | 0.05732 | 0.1854 |
| 134 | 10 | 1 | 0.0928 | 0.0295 | 0.0498 | 0.1729 |
| 135 | 9 | 1 | 0.0825 | 0.0279 | 0.04247 | 0.1602 |
| 136 | 8 | 1 | 0.0722 | 0.0263 | 0.03535 | 0.1473 |
| 137 | 7 | 1 | 0.0619 | 0.0245 | 0.0285 | 0.1343 |
| 138 | 6 | 1 | 0.0515 | 0.0225 | 0.02195 | 0.121 |
| 139 | 5 | 1 | 0.0412 | 0.0202 | 0.0158 | 0.1077 |
| 140 | 4 | 1 | 0.0309 | 0.0176 | 0.01015 | 0.0942 |
| 141 | 3 | 1 | 0.0206 | 0.0144 | 0.00523 | 0.0813 |
| 142 | 2 | 1 | 0.0103 | 0.0103 | 0.00147 | 0.0724 |
| 143 | 1 | 1 | 0 | NaN | NA | NA |

**Table S169.** Salihli station Kaplan-Meier drought risk estimates according to SPEI-3, 6, and 12

| Drought Risk (SPEI3) | | Drought Risk (SPEI6) | | Drought Risk (SPEI12) | |
| --- | --- | --- | --- | --- | --- |
| Time | Drought Risk | Time | Drought Risk | Time | Drought Risk |
| 1 | 0.0471 | 1 | 0.0659 | 1 | 0.0309 |
| 2 | 0.0706 | 2 | 0.1648 | 2 | 0.0722 |
| 3 | 0.1529 | 3 | 0.2527 | 3 | 0.1031 |
| 4 | 0.2353 | 4 | 0.3077 | 4 | 0.1237 |
| 5 | 0.3294 | 5 | 0.3297 | 5 | 0.1443 |
| 6 | 0.4353 | 6 | 0.3516 | 6 | 0.1546 |
| 7 | 0.4941 | 7 | 0.3956 | 7 | 0.1649 |
| 8 | 0.5647 | 8 | 0.4396 | 8 | 0.1856 |
| 9 | 0.5882 | 9 | 0.4945 | 9 | 0.2062 |
| 10 | 0.6471 | 10 | 0.5275 | 10 | 0.2268 |
| 11 | 0.6706 | 11 | 0.5604 | 11 | 0.2371 |
| 12 | 0.6941 | 12 | 0.5934 | 12 | 0.268 |
| 13 | 0.7176 | 13 | 0.6264 | 13 | 0.3196 |
| 14 | 0.7412 | 14 | 0.6593 | 14 | 0.3711 |
| 15 | 0.7647 | 15 | 0.6813 | 15 | 0.4124 |
| 16 | 0.7765 | 16 | 0.6923 | 16 | 0.4536 |
| 21 | 0.7882 | 17 | 0.7033 | 17 | 0.4948 |
| 22 | 0.8235 | 18 | 0.7253 | 18 | 0.5361 |
| 23 | 0.8471 | 21 | 0.7363 | 19 | 0.5567 |
| 24 | 0.8588 | 24 | 0.7582 | 20 | 0.5773 |
| 25 | 0.8824 | 25 | 0.7692 | 21 | 0.5876 |
| 30 | 0.8941 | 26 | 0.7802 | 23 | 0.5979 |
| 31 | 0.9059 | 27 | 0.8022 | 24 | 0.6186 |
| 39 | 0.9176 | 28 | 0.8132 | 25 | 0.6289 |
| 40 | 0.9294 | 29 | 0.8242 | 26 | 0.6392 |
| 41 | 0.9412 | 30 | 0.8462 | 27 | 0.6495 |
| 42 | 0.9529 | 31 | 0.8681 | 28 | 0.6598 |
| 43 | 0.9765 | 32 | 0.8791 | 29 | 0.6701 |
| 46 | 0.9882 | 37 | 0.8901 | 30 | 0.6804 |
| 56 | 1 | 38 | 0.9011 | 31 | 0.6907 |
|  |  | 39 | 0.9231 | 32 | 0.701 |
|  |  | 40 | 0.9341 | 33 | 0.7113 |
|  |  | 41 | 0.9451 | 34 | 0.7216 |
|  |  | 42 | 0.956 | 35 | 0.7423 |
|  |  | 43 | 0.967 | 36 | 0.7629 |
|  |  | 44 | 0.978 | 37 | 0.7938 |
|  |  | 66 | 0.989 | 38 | 0.8144 |
|  |  | 90 | 1 | 39 | 0.8247 |
|  |  |  |  | 40 | 0.8351 |
|  |  |  |  | 41 | 0.8454 |
|  |  |  |  | 42 | 0.8557 |
|  |  |  |  | 43 | 0.866 |
|  |  |  |  | 52 | 0.8763 |
|  |  |  |  | 53 | 0.8866 |
|  |  |  |  | 65 | 0.8969 |
|  |  |  |  | 134 | 0.9072 |
|  |  |  |  | 135 | 0.9175 |
|  |  |  |  | 136 | 0.9278 |
|  |  |  |  | 137 | 0.9381 |
|  |  |  |  | 138 | 0.9485 |
|  |  |  |  | 139 | 0.9588 |
|  |  |  |  | 140 | 0.9691 |
|  |  |  |  | 141 | 0.9794 |
|  |  |  |  | 142 | 0.9897 |
|  |  |  |  | 143 | 1 |

**Table S170.** Sarigol station Kaplan-Meier survival estimates according to SPI-3

| Kaplan-Meier Wet to Dry (SPI3) | | | | | | |
| --- | --- | --- | --- | --- | --- | --- |
|  |  | n | events | median | 0.95LCL | 0.95UCL |
|  |  | 45 | 45 | 7 | 6 | 9 |
| time | n.risk | n.event | survival | std.err | lower 95% CL | upper 95% CL |
| 2 | 45 | 2 | 0.9556 | 0.0307 | 0.8972 | 1 |
| 3 | 43 | 4 | 0.8667 | 0.0507 | 0.7728 | 0.972 |
| 4 | 39 | 7 | 0.7111 | 0.0676 | 0.5903 | 0.857 |
| 5 | 32 | 3 | 0.6444 | 0.0714 | 0.5187 | 0.801 |
| 6 | 29 | 4 | 0.5556 | 0.0741 | 0.4278 | 0.721 |
| 7 | 25 | 5 | 0.4444 | 0.0741 | 0.3206 | 0.616 |
| 8 | 20 | 4 | 0.3556 | 0.0714 | 0.2399 | 0.527 |
| 9 | 16 | 2 | 0.3111 | 0.069 | 0.2014 | 0.481 |
| 10 | 14 | 3 | 0.2444 | 0.0641 | 0.1462 | 0.409 |
| 11 | 11 | 3 | 0.1778 | 0.057 | 0.0948 | 0.333 |
| 14 | 8 | 1 | 0.1556 | 0.054 | 0.0787 | 0.307 |
| 17 | 7 | 1 | 0.1333 | 0.0507 | 0.0633 | 0.281 |
| 18 | 6 | 1 | 0.1111 | 0.0468 | 0.0486 | 0.254 |
| 19 | 5 | 2 | 0.0667 | 0.0372 | 0.0223 | 0.199 |
| 21 | 3 | 1 | 0.0444 | 0.0307 | 0.0115 | 0.172 |
| 23 | 2 | 1 | 0.0222 | 0.022 | 0.0032 | 0.154 |
| 27 | 1 | 1 | 0 | NaN | NA | NA |

**Table S171.** Sarigol station Kaplan-Meier survival estimates according to SPI-6

| Kaplan-Meier Wet to Dry (SPI6) | | | | | | |
| --- | --- | --- | --- | --- | --- | --- |
|  |  | n | events | median | 0.95LCL | 0.95UCL |
|  |  | 50 | 50 | 8 | 6 | 11 |
| time | n.risk | n.event | survival | std.err | lower 95% CL | upper 95% CL |
| 1 | 50 | 4 | 0.92 | 0.0384 | 0.84779 | 0.998 |
| 2 | 46 | 1 | 0.9 | 0.0424 | 0.82057 | 0.987 |
| 3 | 45 | 2 | 0.86 | 0.0491 | 0.769 | 0.962 |
| 4 | 43 | 4 | 0.78 | 0.0586 | 0.67323 | 0.904 |
| 5 | 39 | 3 | 0.72 | 0.0635 | 0.60571 | 0.856 |
| 6 | 36 | 5 | 0.62 | 0.0686 | 0.49906 | 0.77 |
| 7 | 31 | 4 | 0.54 | 0.0705 | 0.41811 | 0.697 |
| 8 | 27 | 4 | 0.46 | 0.0705 | 0.34067 | 0.621 |
| 9 | 23 | 3 | 0.4 | 0.0693 | 0.28486 | 0.562 |
| 10 | 20 | 3 | 0.34 | 0.067 | 0.23108 | 0.5 |
| 11 | 17 | 4 | 0.26 | 0.062 | 0.16289 | 0.415 |
| 12 | 13 | 2 | 0.22 | 0.0586 | 0.13054 | 0.371 |
| 13 | 11 | 1 | 0.2 | 0.0566 | 0.11489 | 0.348 |
| 22 | 10 | 1 | 0.18 | 0.0543 | 0.09962 | 0.325 |
| 27 | 9 | 1 | 0.16 | 0.0518 | 0.08478 | 0.302 |
| 28 | 8 | 1 | 0.14 | 0.0491 | 0.07043 | 0.278 |
| 30 | 7 | 1 | 0.12 | 0.046 | 0.05665 | 0.254 |
| 32 | 6 | 1 | 0.1 | 0.0424 | 0.04354 | 0.23 |
| 33 | 5 | 1 | 0.08 | 0.0384 | 0.03125 | 0.205 |
| 48 | 4 | 1 | 0.06 | 0.0336 | 0.02003 | 0.18 |
| 49 | 3 | 1 | 0.04 | 0.0277 | 0.01029 | 0.156 |
| 50 | 2 | 1 | 0.02 | 0.0198 | 0.00287 | 0.139 |
| 51 | 1 | 1 | 0 | NaN | NA | NA |

**Table S172.** Sarigol station Kaplan-Meier survival estimates according to SPI-12

| Kaplan-Meier Wet to Dry (SPI12) | | | | | | |
| --- | --- | --- | --- | --- | --- | --- |
|  |  | n | events | median | 0.95LCL | 0.95UCL |
|  |  | 44 | 44 | 7 | 5 | 36 |
| time | n.risk | n.event | survival | std.err | lower 95% CL | upper 95% CL |
| 1 | 44 | 1 | 0.9773 | 0.0225 | 0.93421 | 1 |
| 2 | 43 | 4 | 0.8864 | 0.0478 | 0.79738 | 0.985 |
| 3 | 39 | 4 | 0.7955 | 0.0608 | 0.68477 | 0.924 |
| 4 | 35 | 4 | 0.7045 | 0.0688 | 0.58185 | 0.853 |
| 5 | 31 | 4 | 0.6136 | 0.0734 | 0.48539 | 0.776 |
| 6 | 27 | 3 | 0.5455 | 0.0751 | 0.4165 | 0.714 |
| 7 | 24 | 3 | 0.4773 | 0.0753 | 0.35033 | 0.65 |
| 8 | 21 | 2 | 0.4318 | 0.0747 | 0.30768 | 0.606 |
| 9 | 19 | 2 | 0.3864 | 0.0734 | 0.26624 | 0.561 |
| 10 | 17 | 1 | 0.3636 | 0.0725 | 0.24599 | 0.538 |
| 11 | 16 | 1 | 0.3409 | 0.0715 | 0.22605 | 0.514 |
| 36 | 15 | 2 | 0.2955 | 0.0688 | 0.18721 | 0.466 |
| 41 | 13 | 1 | 0.2727 | 0.0671 | 0.16834 | 0.442 |
| 42 | 12 | 1 | 0.25 | 0.0653 | 0.14986 | 0.417 |
| 48 | 11 | 1 | 0.2273 | 0.0632 | 0.1318 | 0.392 |
| 49 | 10 | 2 | 0.1818 | 0.0581 | 0.09715 | 0.34 |
| 50 | 8 | 2 | 0.1364 | 0.0517 | 0.06483 | 0.287 |
| 51 | 6 | 1 | 0.1136 | 0.0478 | 0.04979 | 0.259 |
| 52 | 5 | 1 | 0.0909 | 0.0433 | 0.03571 | 0.231 |
| 53 | 4 | 1 | 0.0682 | 0.038 | 0.02287 | 0.203 |
| 54 | 3 | 1 | 0.0455 | 0.0314 | 0.01174 | 0.176 |
| 55 | 2 | 1 | 0.0227 | 0.0225 | 0.00327 | 0.158 |
| 56 | 1 | 1 | 0 | NaN | NA | NA |

**Table S173.** Sarigol station Kaplan-Meier drought risk estimates according to SPI-3, 6, and 12

| Drought Risk (SPI3) | | Drought Risk (SPI6) | | Drought Risk (SPI12) | |
| --- | --- | --- | --- | --- | --- |
| Time | Drought Risk | Time | Drought Risk | Time | Drought Risk |
| 2 | 0.0444 | 1 | 0.08 | 1 | 0.0227 |
| 3 | 0.1333 | 2 | 0.1 | 2 | 0.1136 |
| 4 | 0.2889 | 3 | 0.14 | 3 | 0.2045 |
| 5 | 0.3556 | 4 | 0.22 | 4 | 0.2955 |
| 6 | 0.4444 | 5 | 0.28 | 5 | 0.3864 |
| 7 | 0.5556 | 6 | 0.38 | 6 | 0.4545 |
| 8 | 0.6444 | 7 | 0.46 | 7 | 0.5227 |
| 9 | 0.6889 | 8 | 0.54 | 8 | 0.5682 |
| 10 | 0.7556 | 9 | 0.6 | 9 | 0.6136 |
| 11 | 0.8222 | 10 | 0.66 | 10 | 0.6364 |
| 12 | 0.7402 | 11 | 0.74 | 11 | 0.6591 |
| 14 | 0.8444 | 12 | 0.78 | 12 | 0.660916 |
| 17 | 0.8667 | 13 | 0.8 | 36 | 0.7045 |
| 18 | 0.8889 | 22 | 0.82 | 41 | 0.7273 |
| 19 | 0.9333 | 27 | 0.84 | 42 | 0.75 |
| 21 | 0.9556 | 28 | 0.86 | 48 | 0.7727 |
| 23 | 0.9778 | 30 | 0.88 | 49 | 0.8182 |
| 27 | 1 | 32 | 0.9 | 50 | 0.8636 |
|  |  | 33 | 0.92 | 51 | 0.8864 |
|  |  | 48 | 0.94 | 52 | 0.9091 |
|  |  | 49 | 0.96 | 53 | 0.9318 |
|  |  | 50 | 0.98 | 54 | 0.9545 |
|  |  | 51 | 1 | 55 | 0.9773 |
|  |  |  |  | 56 | 1 |

**Table S174.** Sarigol station Kaplan-Meier survival estimates according to SPEI-3

| Kaplan-Meier Wet to Dry (SPEI3) | | | | | | | |
| --- | --- | --- | --- | --- | --- | --- | --- |
|  |  | n | events | median | 0.95LCL | 0.95UCL |
|  |  | 43 | 43 | 9 | 7 | 10 |
| time | n.risk | n.event | survival | std.err | lower 95% CI | upper 95% CI |
| 1 | 43 | 2 | 0.9535 | 0.0321 | 0.89258 | 1.000 |
| 2 | 41 | 1 | 0.9302 | 0.0388 | 0.85712 | 1.000 |
| 3 | 40 | 4 | 0.8372 | 0.0563 | 0.73383 | 0.955 |
| 4 | 36 | 3 | 0.7674 | 0.0644 | 0.65101 | 0.905 |
| 5 | 33 | 3 | 0.6977 | 0.07 | 0.57306 | 0.849 |
| 6 | 30 | 2 | 0.6512 | 0.0727 | 0.52322 | 0.81 |
| 7 | 28 | 3 | 0.5814 | 0.0752 | 0.45116 | 0.749 |
| 8 | 25 | 3 | 0.5116 | 0.0762 | 0.38206 | 0.685 |
| 9 | 22 | 5 | 0.3953 | 0.0746 | 0.27318 | 0.572 |
| 10 | 17 | 4 | 0.3023 | 0.07 | 0.19199 | 0.476 |
| 11 | 13 | 3 | 0.2326 | 0.0644 | 0.13512 | 0.4 |
| 14 | 10 | 2 | 0.186 | 0.0593 | 0.09957 | 0.348 |
| 16 | 8 | 1 | 0.1628 | 0.0563 | 0.08265 | 0.321 |
| 17 | 7 | 1 | 0.1395 | 0.0528 | 0.06643 | 0.293 |
| 18 | 6 | 1 | 0.1163 | 0.0489 | 0.05101 | 0.265 |
| 19 | 5 | 1 | 0.093 | 0.0443 | 0.03658 | 0.237 |
| 29 | 4 | 1 | 0.0698 | 0.0388 | 0.02342 | 0.208 |
| 30 | 3 | 1 | 0.0465 | 0.0321 | 0.01202 | 0.18 |
| 31 | 2 | 1 | 0.0233 | 0.023 | 0.00335 | 0.161 |
| 32 | 1 | 1 | 0 | NaN | NA | NA |

**Table S175.** Sarigol station Kaplan-Meier survival estimates according to SPEI-6

| Kaplan-Meier Wet to Dry (SPEI6) | | | | | | | |
| --- | --- | --- | --- | --- | --- | --- | --- |
|  |  | n | events | median | 0.95LCL | 0.95UCL |
|  |  | 51 | 51 | 15 | 13 | 18 |
| time | n.risk | n.event | survival | std.err | lower 95% CI | upper 95% CI |
| 1 | 51 | 3 | 0.9412 | 0.0329 | 0.87877 | 1.000 |
| 2 | 48 | 3 | 0.8824 | 0.0451 | 0.79821 | 0.975 |
| 3 | 45 | 1 | 0.8627 | 0.0482 | 0.77329 | 0.963 |
| 6 | 44 | 2 | 0.8235 | 0.0534 | 0.72528 | 0.935 |
| 7 | 42 | 1 | 0.8039 | 0.0556 | 0.70202 | 0.921 |
| 8 | 41 | 1 | 0.7843 | 0.0576 | 0.67918 | 0.906 |
| 9 | 40 | 1 | 0.7647 | 0.0594 | 0.65672 | 0.89 |
| 10 | 39 | 1 | 0.7451 | 0.061 | 0.6346 | 0.875 |
| 11 | 38 | 2 | 0.7059 | 0.0638 | 0.59128 | 0.843 |
| 12 | 36 | 4 | 0.6275 | 0.0677 | 0.50785 | 0.775 |
| 13 | 32 | 3 | 0.5686 | 0.0694 | 0.44773 | 0.722 |
| 14 | 29 | 2 | 0.5294 | 0.0699 | 0.40871 | 0.686 |
| 15 | 27 | 3 | 0.4706 | 0.0699 | 0.35174 | 0.63 |
| 16 | 24 | 2 | 0.4314 | 0.0694 | 0.31478 | 0.591 |
| 17 | 22 | 3 | 0.3725 | 0.0677 | 0.26092 | 0.532 |
| 18 | 19 | 2 | 0.3333 | 0.066 | 0.22611 | 0.491 |
| 19 | 17 | 2 | 0.2941 | 0.0638 | 0.19225 | 0.45 |
| 20 | 15 | 1 | 0.2745 | 0.0625 | 0.17571 | 0.429 |
| 21 | 14 | 1 | 0.2549 | 0.061 | 0.15944 | 0.408 |
| 22 | 13 | 1 | 0.2353 | 0.0594 | 0.14346 | 0.386 |
| 23 | 12 | 1 | 0.2157 | 0.0576 | 0.1278 | 0.364 |
| 24 | 11 | 1 | 0.1961 | 0.0556 | 0.11248 | 0.342 |
| 25 | 10 | 1 | 0.1765 | 0.0534 | 0.09754 | 0.319 |
| 26 | 9 | 1 | 0.1569 | 0.0509 | 0.08302 | 0.296 |
| 27 | 8 | 1 | 0.1373 | 0.0482 | 0.06898 | 0.273 |
| 28 | 7 | 1 | 0.1176 | 0.0451 | 0.05548 | 0.249 |
| 29 | 6 | 1 | 0.098 | 0.0416 | 0.04265 | 0.225 |
| 30 | 5 | 2 | 0.0588 | 0.0329 | 0.01962 | 0.176 |
| 31 | 3 | 1 | 0.0392 | 0.0272 | 0.01008 | 0.153 |
| 32 | 2 | 1 | 0.0196 | 0.0194 | 0.00282 | 0.137 |
| 54 | 1 | 1 | 0 | NaN | NA | NA |

**Table S176.** Sarigol station Kaplan-Meier survival estimates according to SPEI-12

| Kaplan-Meier Wet to Dry (SPEI12) | | | | | | | |
| --- | --- | --- | --- | --- | --- | --- | --- |
|  |  | n | events | median | 0.95LCL | 0.95UCL |
|  |  | 38 | 38 | 12.5 | 6 | 43 |
| time | n.risk | n.event | survival | std.err | lower 95% CI | upper 95% CI |
| 1 | 38 | 1 | 0.9737 | 0.026 | 0.9241 | 1.000 |
| 2 | 37 | 3 | 0.8947 | 0.0498 | 0.8023 | 0.998 |
| 3 | 34 | 4 | 0.7895 | 0.0661 | 0.6699 | 0.93 |
| 4 | 30 | 3 | 0.7105 | 0.0736 | 0.58 | 0.87 |
| 5 | 27 | 2 | 0.6579 | 0.077 | 0.5231 | 0.827 |
| 6 | 25 | 1 | 0.6316 | 0.0783 | 0.4954 | 0.805 |
| 7 | 24 | 1 | 0.6053 | 0.0793 | 0.4682 | 0.782 |
| 8 | 23 | 1 | 0.5789 | 0.0801 | 0.4414 | 0.759 |
| 9 | 22 | 1 | 0.5526 | 0.0807 | 0.4151 | 0.736 |
| 11 | 21 | 1 | 0.5263 | 0.081 | 0.3893 | 0.712 |
| 12 | 20 | 1 | 0.5 | 0.0811 | 0.3638 | 0.687 |
| 13 | 19 | 1 | 0.4737 | 0.081 | 0.3388 | 0.662 |
| 14 | 18 | 1 | 0.4474 | 0.0807 | 0.3142 | 0.637 |
| 33 | 17 | 1 | 0.4211 | 0.0801 | 0.29 | 0.611 |
| 39 | 16 | 1 | 0.3947 | 0.0793 | 0.2663 | 0.585 |
| 40 | 15 | 1 | 0.3684 | 0.0783 | 0.243 | 0.559 |
| 41 | 14 | 1 | 0.3421 | 0.077 | 0.2201 | 0.532 |
| 42 | 13 | 1 | 0.3158 | 0.0754 | 0.1978 | 0.504 |
| 43 | 12 | 1 | 0.2895 | 0.0736 | 0.1759 | 0.476 |
| 44 | 11 | 1 | 0.2632 | 0.0714 | 0.1546 | 0.448 |
| 45 | 10 | 1 | 0.2368 | 0.069 | 0.1338 | 0.419 |
| 46 | 9 | 1 | 0.2105 | 0.0661 | 0.1137 | 0.39 |
| 47 | 8 | 2 | 0.1579 | 0.0592 | 0.0758 | 0.329 |
| 48 | 6 | 1 | 0.1316 | 0.0548 | 0.0581 | 0.298 |
| 49 | 5 | 1 | 0.1053 | 0.0498 | 0.0417 | 0.266 |
| 50 | 4 | 1 | 0.0789 | 0.0437 | 0.0266 | 0.234 |
| 51 | 3 | 1 | 0.0526 | 0.0362 | 0.0137 | 0.203 |
| 52 | 2 | 1 | 0.0263 | 0.026 | 0.0038 | 0.182 |
| 74 | 1 | 1 | 0 | NaN | NA | NA |

**Table S177.** Sarigol station Kaplan-Meier drought risk estimates according to SPEI-3, 6, and 12

| Drought Risk (SPEI3) | | Drought Risk (SPEI6) | | Drought Risk (SPEI12) | |
| --- | --- | --- | --- | --- | --- |
| Time | Drought Risk | Time | Drought Risk | Time | Drought Risk |
| 1 | 0.0465 | 1 | 0.0588 | 1 | 0.0263 |
| 2 | 0.0698 | 2 | 0.1176 | 2 | 0.1053 |
| 3 | 0.1628 | 3 | 0.1373 | 3 | 0.2105 |
| 4 | 0.2326 | 6 | 0.1765 | 4 | 0.2895 |
| 5 | 0.3023 | 7 | 0.1961 | 5 | 0.3421 |
| 6 | 0.3488 | 8 | 0.2157 | 6 | 0.3684 |
| 7 | 0.4186 | 9 | 0.2353 | 7 | 0.3947 |
| 8 | 0.4884 | 10 | 0.2549 | 8 | 0.4211 |
| 9 | 0.6047 | 11 | 0.2941 | 9 | 0.4474 |
| 10 | 0.6977 | 12 | 0.3725 | 11 | 0.4737 |
| 11 | 0.7674 | 13 | 0.4314 | 12 | 0.5 |
| 12 | 0.782933 | 14 | 0.4706 | 13 | 0.5263 |
| 14 | 0.814 | 15 | 0.5294 | 14 | 0.5526 |
| 16 | 0.8372 | 16 | 0.5686 | 33 | 0.5789 |
| 17 | 0.8605 | 17 | 0.6275 | 39 | 0.6053 |
| 18 | 0.8837 | 18 | 0.6667 | 40 | 0.6316 |
| 19 | 0.907 | 19 | 0.7059 | 41 | 0.6579 |
| 29 | 0.9302 | 20 | 0.7255 | 42 | 0.6842 |
| 30 | 0.9535 | 21 | 0.7451 | 43 | 0.7105 |
| 31 | 0.9767 | 22 | 0.7647 | 44 | 0.7368 |
| 32 | 1 | 23 | 0.7843 | 45 | 0.7632 |
|  |  | 24 | 0.8039 | 46 | 0.7895 |
|  |  | 25 | 0.8235 | 47 | 0.8421 |
|  |  | 26 | 0.8431 | 48 | 0.8684 |
|  |  | 27 | 0.8627 | 49 | 0.8947 |
|  |  | 28 | 0.8824 | 50 | 0.9211 |
|  |  | 29 | 0.902 | 51 | 0.9474 |
|  |  | 30 | 0.9412 | 52 | 0.9737 |
|  |  | 31 | 0.9608 | 74 | 1 |
|  |  | 32 | 0.9804 |  |  |
|  |  | 54 | 1 |  |  |

**Table S178.** Saruhanli station Kaplan-Meier survival estimates according to SPI-3

| Kaplan-Meier Wet to Dry (SPI3) | | | | | | |
| --- | --- | --- | --- | --- | --- | --- |
|  |  | n | events | median | 0.95LCL | 0.95UCL |
|  |  | 66 | 66 | 8 | 7 | 9 |
| time | n.risk | n.event | survival | std.err | lower 95% CL | upper 95% CL |
| 1 | 66 | 2 | 0.9697 | 0.0211 | 0.92921 | 1 |
| 2 | 64 | 2 | 0.9394 | 0.0294 | 0.88356 | 0.999 |
| 3 | 62 | 10 | 0.7879 | 0.0503 | 0.69517 | 0.893 |
| 4 | 52 | 3 | 0.7424 | 0.0538 | 0.64408 | 0.856 |
| 5 | 49 | 4 | 0.6818 | 0.0573 | 0.57822 | 0.804 |
| 6 | 45 | 3 | 0.6364 | 0.0592 | 0.53028 | 0.764 |
| 7 | 42 | 8 | 0.5152 | 0.0615 | 0.40765 | 0.651 |
| 8 | 34 | 4 | 0.4545 | 0.0613 | 0.34898 | 0.592 |
| 9 | 30 | 7 | 0.3485 | 0.0587 | 0.25057 | 0.485 |
| 10 | 23 | 4 | 0.2879 | 0.0557 | 0.19698 | 0.421 |
| 11 | 19 | 2 | 0.2576 | 0.0538 | 0.17101 | 0.388 |
| 12 | 17 | 2 | 0.2273 | 0.0516 | 0.14566 | 0.355 |
| 13 | 15 | 4 | 0.1667 | 0.0459 | 0.09718 | 0.286 |
| 14 | 11 | 3 | 0.1212 | 0.0402 | 0.0633 | 0.232 |
| 15 | 8 | 1 | 0.1061 | 0.0379 | 0.05265 | 0.214 |
| 16 | 7 | 1 | 0.0909 | 0.0354 | 0.04239 | 0.195 |
| 17 | 6 | 1 | 0.0758 | 0.0326 | 0.03262 | 0.176 |
| 18 | 5 | 3 | 0.0303 | 0.0211 | 0.00774 | 0.119 |
| 19 | 2 | 1 | 0.0152 | 0.015 | 0.00217 | 0.106 |
| 20 | 1 | 1 | 0 | NaN | NA | NA |

**Table S179.** Saruhanli station Kaplan-Meier survival estimates according to SPI-6

| Kaplan-Meier Wet to Dry (SPI6) | | | | | | |
| --- | --- | --- | --- | --- | --- | --- |
|  |  | n | events | median | 0.95LCL | 0.95UCL |
|  |  | 59 | 59 | 9 | 6 | 12 |
| time | n.risk | n.event | survival | std.err | lower 95% CL | upper 95% CL |
| 1 | 59 | 5 | 0.9153 | 0.0363 | 0.84688 | 0.989 |
| 2 | 54 | 6 | 0.8136 | 0.0507 | 0.72001 | 0.919 |
| 3 | 48 | 4 | 0.7458 | 0.0567 | 0.64254 | 0.866 |
| 4 | 44 | 3 | 0.6949 | 0.0599 | 0.58682 | 0.823 |
| 5 | 41 | 2 | 0.661 | 0.0616 | 0.55062 | 0.794 |
| 6 | 39 | 3 | 0.6102 | 0.0635 | 0.49759 | 0.748 |
| 7 | 36 | 3 | 0.5593 | 0.0646 | 0.44596 | 0.701 |
| 8 | 33 | 3 | 0.5085 | 0.0651 | 0.39565 | 0.653 |
| 9 | 30 | 2 | 0.4746 | 0.065 | 0.36283 | 0.621 |
| 10 | 28 | 3 | 0.4237 | 0.0643 | 0.31467 | 0.571 |
| 11 | 25 | 4 | 0.3559 | 0.0623 | 0.25252 | 0.502 |
| 12 | 21 | 1 | 0.339 | 0.0616 | 0.23737 | 0.484 |
| 13 | 20 | 1 | 0.322 | 0.0608 | 0.22239 | 0.466 |
| 14 | 19 | 1 | 0.3051 | 0.0599 | 0.20757 | 0.448 |
| 15 | 18 | 2 | 0.2712 | 0.0579 | 0.17848 | 0.412 |
| 16 | 16 | 1 | 0.2542 | 0.0567 | 0.16423 | 0.394 |
| 18 | 15 | 2 | 0.2203 | 0.054 | 0.13634 | 0.356 |
| 19 | 13 | 2 | 0.1864 | 0.0507 | 0.10941 | 0.318 |
| 20 | 11 | 1 | 0.1695 | 0.0488 | 0.09635 | 0.298 |
| 21 | 10 | 1 | 0.1525 | 0.0468 | 0.0836 | 0.278 |
| 23 | 9 | 1 | 0.1356 | 0.0446 | 0.07119 | 0.258 |
| 28 | 8 | 1 | 0.1186 | 0.0421 | 0.05918 | 0.238 |
| 36 | 7 | 1 | 0.1017 | 0.0393 | 0.04764 | 0.217 |
| 37 | 6 | 1 | 0.0847 | 0.0363 | 0.03664 | 0.196 |
| 38 | 5 | 1 | 0.0678 | 0.0327 | 0.02632 | 0.175 |
| 39 | 4 | 1 | 0.0508 | 0.0286 | 0.01688 | 0.153 |
| 40 | 3 | 1 | 0.0339 | 0.0236 | 0.00868 | 0.132 |
| 41 | 2 | 1 | 0.0169 | 0.0168 | 0.00243 | 0.118 |
| 42 | 1 | 1 | 0 | NaN | NA | NA |

**Table S180.** Saruhanli station Kaplan-Meier survival estimates according to SPI-12

| Kaplan-Meier Wet to Dry (SPI12) | | | | | | |
| --- | --- | --- | --- | --- | --- | --- |
|  |  | n | events | median | 0.95LCL | 0.95UCL |
|  |  | 64 | 64 | 22.5 | 21 | 34 |
| time | n.risk | n.event | survival | std.err | lower 95% CL | upper 95% CL |
| 1 | 64 | 3 | 0.9531 | 0.0264 | 0.90272 | 1 |
| 2 | 61 | 5 | 0.875 | 0.0413 | 0.79761 | 0.96 |
| 3 | 56 | 3 | 0.8281 | 0.0472 | 0.74067 | 0.926 |
| 4 | 53 | 3 | 0.7812 | 0.0517 | 0.68626 | 0.889 |
| 5 | 50 | 3 | 0.7344 | 0.0552 | 0.63376 | 0.851 |
| 6 | 47 | 1 | 0.7188 | 0.0562 | 0.61662 | 0.838 |
| 7 | 46 | 1 | 0.7031 | 0.0571 | 0.59965 | 0.824 |
| 17 | 45 | 1 | 0.6875 | 0.0579 | 0.58282 | 0.811 |
| 18 | 44 | 1 | 0.6719 | 0.0587 | 0.56615 | 0.797 |
| 19 | 43 | 1 | 0.6562 | 0.0594 | 0.54962 | 0.784 |
| 20 | 42 | 3 | 0.6094 | 0.061 | 0.50084 | 0.741 |
| 21 | 39 | 4 | 0.5469 | 0.0622 | 0.43756 | 0.684 |
| 22 | 35 | 3 | 0.5 | 0.0625 | 0.39135 | 0.639 |
| 23 | 32 | 1 | 0.4844 | 0.0625 | 0.37619 | 0.624 |
| 24 | 31 | 1 | 0.4688 | 0.0624 | 0.36114 | 0.608 |
| 25 | 30 | 1 | 0.4531 | 0.0622 | 0.3462 | 0.593 |
| 27 | 29 | 1 | 0.4375 | 0.062 | 0.33138 | 0.578 |
| 28 | 28 | 1 | 0.4219 | 0.0617 | 0.31669 | 0.562 |
| 31 | 27 | 1 | 0.4062 | 0.0614 | 0.30211 | 0.546 |
| 32 | 26 | 1 | 0.3906 | 0.061 | 0.28765 | 0.53 |
| 33 | 25 | 1 | 0.375 | 0.0605 | 0.27332 | 0.515 |
| 34 | 24 | 1 | 0.3594 | 0.06 | 0.25911 | 0.498 |
| 35 | 23 | 1 | 0.3438 | 0.0594 | 0.24504 | 0.482 |
| 36 | 22 | 2 | 0.3125 | 0.0579 | 0.21729 | 0.449 |
| 37 | 20 | 2 | 0.2812 | 0.0562 | 0.19011 | 0.416 |
| 38 | 18 | 2 | 0.25 | 0.0541 | 0.16355 | 0.382 |
| 39 | 16 | 1 | 0.2344 | 0.053 | 0.15052 | 0.365 |
| 40 | 15 | 1 | 0.2188 | 0.0517 | 0.13768 | 0.348 |
| 41 | 14 | 1 | 0.2031 | 0.0503 | 0.12503 | 0.33 |
| 42 | 13 | 1 | 0.1875 | 0.0488 | 0.11259 | 0.312 |
| 43 | 12 | 1 | 0.1719 | 0.0472 | 0.10038 | 0.294 |
| 44 | 11 | 1 | 0.1562 | 0.0454 | 0.08842 | 0.276 |
| 45 | 10 | 1 | 0.1406 | 0.0435 | 0.07674 | 0.258 |
| 46 | 9 | 1 | 0.125 | 0.0413 | 0.06537 | 0.239 |
| 60 | 8 | 1 | 0.1094 | 0.039 | 0.05436 | 0.22 |
| 61 | 7 | 1 | 0.0938 | 0.0364 | 0.04377 | 0.201 |
| 62 | 6 | 1 | 0.0781 | 0.0335 | 0.03367 | 0.181 |
| 63 | 5 | 1 | 0.0625 | 0.0303 | 0.0242 | 0.161 |
| 64 | 4 | 1 | 0.0469 | 0.0264 | 0.01553 | 0.141 |
| 65 | 3 | 1 | 0.0312 | 0.0217 | 0.00799 | 0.122 |
| 66 | 2 | 1 | 0.0156 | 0.0155 | 0.00224 | 0.109 |
| 67 | 1 | 1 | 0 | NaN | NA | NA |

**Table S181.** Saruhanli station Kaplan-Meier drought risk estimates according to SPI-3, 6, and 12

| Drought Risk (SPI3) | | Drought Risk (SPI6) | | Drought Risk (SPI12) | |
| --- | --- | --- | --- | --- | --- |
| Time | Drought Risk | Time | Drought Risk | Time | Drought Risk |
| 1 | 0.0303 | 1 | 0.0847 | 1 | 0.0469 |
| 2 | 0.0606 | 2 | 0.1864 | 2 | 0.125 |
| 3 | 0.2121 | 3 | 0.2542 | 3 | 0.1719 |
| 4 | 0.2576 | 4 | 0.3051 | 4 | 0.2188 |
| 5 | 0.3182 | 5 | 0.339 | 5 | 0.2656 |
| 6 | 0.3636 | 6 | 0.3898 | 6 | 0.2812 |
| 7 | 0.4848 | 7 | 0.4407 | 7 | 0.2969 |
| 8 | 0.5455 | 8 | 0.4915 | 12 | 0.3047 |
| 9 | 0.6515 | 9 | 0.5254 | 17 | 0.3125 |
| 10 | 0.7121 | 10 | 0.5763 | 18 | 0.3281 |
| 11 | 0.7424 | 11 | 0.6441 | 19 | 0.3438 |
| 12 | 0.7727 | 12 | 0.661 | 20 | 0.3906 |
| 13 | 0.8333 | 13 | 0.678 | 21 | 0.4531 |
| 14 | 0.8788 | 14 | 0.6949 | 22 | 0.5 |
| 15 | 0.8939 | 15 | 0.7288 | 23 | 0.5156 |
| 16 | 0.9091 | 16 | 0.7458 | 24 | 0.5312 |
| 17 | 0.9242 | 18 | 0.7797 | 25 | 0.5469 |
| 18 | 0.9697 | 19 | 0.8136 | 27 | 0.5625 |
| 19 | 0.9848 | 20 | 0.8305 | 28 | 0.5781 |
| 20 | 1 | 21 | 0.8475 | 31 | 0.5938 |
|  |  | 23 | 0.8644 | 32 | 0.6094 |
|  |  | 28 | 0.8814 | 33 | 0.625 |
|  |  | 36 | 0.8983 | 34 | 0.6406 |
|  |  | 37 | 0.9153 | 35 | 0.6562 |
|  |  | 38 | 0.9322 | 36 | 0.6875 |
|  |  | 39 | 0.9492 | 37 | 0.7188 |
|  |  | 40 | 0.9661 | 38 | 0.75 |
|  |  | 41 | 0.9831 | 39 | 0.7656 |
|  |  | 42 | 1 | 40 | 0.7812 |
|  |  |  |  | 41 | 0.7969 |
|  |  |  |  | 42 | 0.8125 |
|  |  |  |  | 43 | 0.8281 |
|  |  |  |  | 44 | 0.8438 |
|  |  |  |  | 45 | 0.8594 |
|  |  |  |  | 46 | 0.875 |
|  |  |  |  | 60 | 0.8906 |
|  |  |  |  | 61 | 0.9062 |
|  |  |  |  | 62 | 0.9219 |
|  |  |  |  | 63 | 0.9375 |
|  |  |  |  | 64 | 0.9531 |
|  |  |  |  | 65 | 0.9688 |
|  |  |  |  | 66 | 0.9844 |
|  |  |  |  | 67 | 1 |

**Table S182.** Saruhanli station Kaplan-Meier survival estimates according to SPEI-3

| Kaplan-Meier Wet to Dry (SPEI3) | | | | | | | |
| --- | --- | --- | --- | --- | --- | --- | --- |
|  |  | n | events | median | 0.95LCL | 0.95UCL |
|  |  | 80 | 80 | 8 | 7 | 9 |
| time | n.risk | n.event | survival | std.err | lower 95% CI | upper 95% CI |
| 1 | 80 | 4 | 0.95 | 0.0244 | 0.90342 | 0.999 |
| 2 | 76 | 3 | 0.9125 | 0.0316 | 0.85264 | 0.9766 |
| 3 | 73 | 10 | 0.7875 | 0.0457 | 0.70277 | 0.8824 |
| 4 | 63 | 7 | 0.7 | 0.0512 | 0.60645 | 0.808 |
| 5 | 56 | 3 | 0.6625 | 0.0529 | 0.56658 | 0.7747 |
| 6 | 53 | 5 | 0.6 | 0.0548 | 0.5017 | 0.7176 |
| 7 | 48 | 6 | 0.525 | 0.0558 | 0.42622 | 0.6467 |
| 8 | 42 | 7 | 0.4375 | 0.0555 | 0.34125 | 0.5609 |
| 9 | 35 | 7 | 0.35 | 0.0533 | 0.25964 | 0.4718 |
| 10 | 28 | 6 | 0.275 | 0.0499 | 0.19267 | 0.3925 |
| 11 | 22 | 3 | 0.2375 | 0.0476 | 0.16038 | 0.3517 |
| 12 | 19 | 1 | 0.225 | 0.0467 | 0.14982 | 0.3379 |
| 13 | 18 | 1 | 0.2125 | 0.0457 | 0.13937 | 0.324 |
| 14 | 17 | 5 | 0.15 | 0.0399 | 0.08903 | 0.2527 |
| 15 | 12 | 4 | 0.1 | 0.0335 | 0.05182 | 0.193 |
| 16 | 8 | 3 | 0.0625 | 0.0271 | 0.02675 | 0.146 |
| 17 | 5 | 1 | 0.05 | 0.0244 | 0.01924 | 0.13 |
| 18 | 4 | 1 | 0.0375 | 0.0212 | 0.01236 | 0.1138 |
| 25 | 3 | 1 | 0.025 | 0.0175 | 0.00636 | 0.0982 |
| 26 | 2 | 1 | 0.0125 | 0.0124 | 0.00178 | 0.0877 |
| 27 | 1 | 1 | 0 | NaN | NA | NA |

**Table S183.** Saruhanli station Kaplan-Meier survival estimates according to SPEI-6

| Kaplan-Meier Wet to Dry (SPEI6) | | | | | | | |
| --- | --- | --- | --- | --- | --- | --- | --- |
|  |  | n | events | median | 0.95LCL | 0.95UCL |
|  |  | 73 | 73 | 11 | 9 | 15 |
| time | n.risk | n.event | survival | std.err | lower 95% CI | upper 95% CI |
| 1 | 73 | 5 | 0.9315 | 0.0296 | 0.87533 | 0.9913 |
| 2 | 68 | 5 | 0.863 | 0.0402 | 0.78764 | 0.9456 |
| 3 | 63 | 5 | 0.7945 | 0.0473 | 0.70703 | 0.8928 |
| 4 | 58 | 5 | 0.726 | 0.0522 | 0.6306 | 0.8359 |
| 5 | 53 | 3 | 0.6849 | 0.0544 | 0.58624 | 0.8002 |
| 6 | 50 | 3 | 0.6438 | 0.056 | 0.54285 | 0.7636 |
| 7 | 47 | 2 | 0.6164 | 0.0569 | 0.5144 | 0.7387 |
| 8 | 45 | 1 | 0.6027 | 0.0573 | 0.50032 | 0.7261 |
| 9 | 44 | 3 | 0.5616 | 0.0581 | 0.45861 | 0.6878 |
| 10 | 41 | 4 | 0.5068 | 0.0585 | 0.40421 | 0.6355 |
| 11 | 37 | 3 | 0.4658 | 0.0584 | 0.3643 | 0.5955 |
| 12 | 34 | 2 | 0.4384 | 0.0581 | 0.33811 | 0.5683 |
| 13 | 32 | 2 | 0.411 | 0.0576 | 0.31227 | 0.5408 |
| 14 | 30 | 2 | 0.3836 | 0.0569 | 0.28677 | 0.513 |
| 15 | 28 | 1 | 0.3699 | 0.0565 | 0.27416 | 0.499 |
| 16 | 27 | 2 | 0.3425 | 0.0555 | 0.24921 | 0.4706 |
| 17 | 25 | 3 | 0.3014 | 0.0537 | 0.21253 | 0.4274 |
| 18 | 22 | 4 | 0.2466 | 0.0504 | 0.16512 | 0.3682 |
| 19 | 18 | 3 | 0.2055 | 0.0473 | 0.13088 | 0.3226 |
| 20 | 15 | 2 | 0.1781 | 0.0448 | 0.10879 | 0.2915 |
| 21 | 13 | 1 | 0.1644 | 0.0434 | 0.098 | 0.2757 |
| 22 | 12 | 1 | 0.1507 | 0.0419 | 0.08741 | 0.2598 |
| 23 | 11 | 1 | 0.137 | 0.0402 | 0.07702 | 0.2436 |
| 24 | 10 | 1 | 0.1233 | 0.0385 | 0.06687 | 0.2273 |
| 28 | 9 | 1 | 0.1096 | 0.0366 | 0.05699 | 0.2107 |
| 38 | 8 | 1 | 0.0959 | 0.0345 | 0.04741 | 0.1939 |
| 39 | 7 | 1 | 0.0822 | 0.0321 | 0.03819 | 0.1769 |
| 40 | 6 | 1 | 0.0685 | 0.0296 | 0.02939 | 0.1596 |
| 41 | 5 | 1 | 0.0548 | 0.0266 | 0.02113 | 0.1421 |
| 42 | 4 | 1 | 0.0411 | 0.0232 | 0.01357 | 0.1245 |
| 43 | 3 | 1 | 0.0274 | 0.0191 | 0.00698 | 0.1075 |
| 44 | 2 | 1 | 0.0137 | 0.0136 | 0.00196 | 0.0959 |
| 107 | 1 | 1 | 0 | NaN | NA | NA |

**Table S184.** Saruhanli station Kaplan-Meier survival estimates according to SPEI-12

| Kaplan-Meier Wet to Dry (SPEI12) | | | | | | | |
| --- | --- | --- | --- | --- | --- | --- | --- |
|  |  | n | events | median | 0.95LCL | 0.95UCL |
|  |  | 80 | 80 | 15.5 | 14 | 17 |
| time | n.risk | n.event | survival | std.err | lower 95% CI | upper 95% CI |
| 1 | 80 | 4 | 0.95 | 0.0244 | 0.90342 | 0.999 |
| 2 | 76 | 4 | 0.9 | 0.0335 | 0.8366 | 0.9682 |
| 3 | 72 | 3 | 0.8625 | 0.0385 | 0.79024 | 0.9414 |
| 4 | 69 | 3 | 0.825 | 0.0425 | 0.7458 | 0.9126 |
| 5 | 66 | 3 | 0.7875 | 0.0457 | 0.70277 | 0.8824 |
| 6 | 63 | 2 | 0.7625 | 0.0476 | 0.67473 | 0.8617 |
| 7 | 61 | 2 | 0.7375 | 0.0492 | 0.64712 | 0.8405 |
| 8 | 59 | 2 | 0.7125 | 0.0506 | 0.61992 | 0.8189 |
| 9 | 57 | 1 | 0.7 | 0.0512 | 0.60645 | 0.808 |
| 12 | 56 | 2 | 0.675 | 0.0524 | 0.57979 | 0.7858 |
| 13 | 54 | 2 | 0.65 | 0.0533 | 0.55345 | 0.7634 |
| 14 | 52 | 5 | 0.5875 | 0.055 | 0.48895 | 0.7059 |
| 15 | 47 | 7 | 0.5 | 0.0559 | 0.40161 | 0.6225 |
| 16 | 40 | 5 | 0.4375 | 0.0555 | 0.34125 | 0.5609 |
| 17 | 35 | 5 | 0.375 | 0.0541 | 0.2826 | 0.4976 |
| 18 | 30 | 5 | 0.3125 | 0.0518 | 0.22578 | 0.4325 |
| 19 | 25 | 4 | 0.2625 | 0.0492 | 0.18181 | 0.379 |
| 20 | 21 | 3 | 0.225 | 0.0467 | 0.14982 | 0.3379 |
| 21 | 18 | 3 | 0.1875 | 0.0436 | 0.11882 | 0.2959 |
| 22 | 15 | 1 | 0.175 | 0.0425 | 0.10874 | 0.2816 |
| 27 | 14 | 1 | 0.1625 | 0.0412 | 0.09881 | 0.2672 |
| 38 | 13 | 1 | 0.15 | 0.0399 | 0.08903 | 0.2527 |
| 59 | 12 | 2 | 0.125 | 0.037 | 0.07 | 0.2232 |
| 60 | 10 | 1 | 0.1125 | 0.0353 | 0.06079 | 0.2082 |
| 61 | 9 | 1 | 0.1 | 0.0335 | 0.05182 | 0.193 |
| 62 | 8 | 1 | 0.0875 | 0.0316 | 0.04312 | 0.1776 |
| 63 | 7 | 1 | 0.075 | 0.0294 | 0.03474 | 0.1619 |
| 64 | 6 | 1 | 0.0625 | 0.0271 | 0.02675 | 0.146 |
| 65 | 5 | 1 | 0.05 | 0.0244 | 0.01924 | 0.13 |
| 66 | 4 | 1 | 0.0375 | 0.0212 | 0.01236 | 0.1138 |
| 67 | 3 | 1 | 0.025 | 0.0175 | 0.00636 | 0.0982 |
| 68 | 2 | 1 | 0.0125 | 0.0124 | 0.00178 | 0.0877 |
| 69 | 1 | 1 | 0 | NaN | NA | NA |

**Table S185.** Saruhanli station Kaplan-Meier drought risk estimates according to SPEI-3, 6, and 12

| Drought Risk (SPEI3) | | Drought Risk (SPEI6) | | Drought Risk (SPEI12) | |
| --- | --- | --- | --- | --- | --- |
| Time | Drought Risk | Time | Drought Risk | Time | Drought Risk |
| 1 | 0.05 | 1 | 0.0685 | 1 | 0.05 |
| 2 | 0.0875 | 2 | 0.137 | 2 | 0.1 |
| 3 | 0.2125 | 3 | 0.2055 | 3 | 0.1375 |
| 4 | 0.3 | 4 | 0.274 | 4 | 0.175 |
| 5 | 0.3375 | 5 | 0.3151 | 5 | 0.2125 |
| 6 | 0.4 | 6 | 0.3562 | 6 | 0.2375 |
| 7 | 0.475 | 7 | 0.3836 | 7 | 0.2625 |
| 8 | 0.5625 | 8 | 0.3973 | 8 | 0.2875 |
| 9 | 0.65 | 9 | 0.4384 | 9 | 0.3 |
| 10 | 0.725 | 10 | 0.4932 | 12 | 0.325 |
| 11 | 0.7625 | 11 | 0.5342 | 13 | 0.35 |
| 12 | 0.775 | 12 | 0.5616 | 14 | 0.4125 |
| 13 | 0.7875 | 13 | 0.589 | 15 | 0.5 |
| 14 | 0.85 | 14 | 0.6164 | 16 | 0.5625 |
| 15 | 0.9 | 15 | 0.6301 | 17 | 0.625 |
| 16 | 0.9375 | 16 | 0.6575 | 18 | 0.6875 |
| 17 | 0.95 | 17 | 0.6986 | 19 | 0.7375 |
| 18 | 0.9625 | 18 | 0.7534 | 20 | 0.775 |
| 25 | 0.975 | 19 | 0.7945 | 21 | 0.8125 |
| 26 | 0.9875 | 20 | 0.8219 | 22 | 0.825 |
| 27 | 1 | 21 | 0.8356 | 27 | 0.8375 |
|  |  | 22 | 0.8493 | 38 | 0.85 |
|  |  | 23 | 0.863 | 59 | 0.875 |
|  |  | 24 | 0.8767 | 60 | 0.8875 |
|  |  | 28 | 0.8904 | 61 | 0.9 |
|  |  | 38 | 0.9041 | 62 | 0.9125 |
|  |  | 39 | 0.9178 | 63 | 0.925 |
|  |  | 40 | 0.9315 | 64 | 0.9375 |
|  |  | 41 | 0.9452 | 65 | 0.95 |
|  |  | 42 | 0.9589 | 66 | 0.9625 |
|  |  | 43 | 0.9726 | 67 | 0.975 |
|  |  | 44 | 0.9863 | 68 | 0.9875 |
|  |  | 107 | 1 | 69 | 1 |

**Table S186.** Selendi station Kaplan-Meier survival estimates according to SPI-3

| Kaplan-Meier Wet to Dry (SPI3) | | | | | | |
| --- | --- | --- | --- | --- | --- | --- |
|  |  | n | events | median | 0.95LCL | 0.95UCL |
|  |  | 78 | 78 | 7 | 6 | 9 |
| time | n.risk | n.event | survival | std.err | lower 95% CL | upper 95% CL |
| 0 | 78 | 1 | 0.9872 | 0.0127 | 0.96253 | 1 |
| 1 | 77 | 7 | 0.8974 | 0.0344 | 0.83257 | 0.9674 |
| 2 | 70 | 3 | 0.859 | 0.0394 | 0.78511 | 0.9398 |
| 3 | 67 | 4 | 0.8077 | 0.0446 | 0.7248 | 0.9001 |
| 4 | 63 | 6 | 0.7308 | 0.0502 | 0.63868 | 0.8361 |
| 5 | 57 | 7 | 0.641 | 0.0543 | 0.54294 | 0.7568 |
| 6 | 50 | 4 | 0.5897 | 0.0557 | 0.49009 | 0.7097 |
| 7 | 46 | 8 | 0.4872 | 0.0566 | 0.38798 | 0.6117 |
| 8 | 38 | 5 | 0.4231 | 0.0559 | 0.32649 | 0.5482 |
| 9 | 33 | 5 | 0.359 | 0.0543 | 0.26685 | 0.4829 |
| 10 | 28 | 5 | 0.2949 | 0.0516 | 0.20922 | 0.4156 |
| 11 | 23 | 4 | 0.2436 | 0.0486 | 0.16475 | 0.3602 |
| 12 | 19 | 4 | 0.1923 | 0.0446 | 0.12203 | 0.3031 |
| 13 | 15 | 2 | 0.1667 | 0.0422 | 0.10147 | 0.2738 |
| 15 | 13 | 1 | 0.1538 | 0.0409 | 0.09142 | 0.2589 |
| 16 | 12 | 1 | 0.141 | 0.0394 | 0.08155 | 0.2439 |
| 17 | 11 | 3 | 0.1026 | 0.0344 | 0.0532 | 0.1977 |
| 24 | 8 | 1 | 0.0897 | 0.0324 | 0.04426 | 0.1819 |
[truncated: 65,437 more chars]
